# Supplementary material
Source: publisher figshare collection journal article supplement (https://acs.figshare.com/ndownloader/files/3614859)
Supplement: Supplementary file 1 [file 3614859]

## Sheet: Sheet1
	Table S1. Complete protein list identified by non-unique peptide hits having a protein ratio of a high confidence level (p < 0.05), showing Swiss-Prot ID, protein description, number of peptides, frames, hits and normalized ratio.
	Protein ID	Description	Peptides	Frames	Hits	Normalized Ratio
	Q15149	PLEC_HUMAN Plectin OS=Homo sapiens GN=PLEC PE=1 SV=3	27	34	246	1.11
	P49327	FAS_HUMAN Fatty acid synthase OS=Homo sapiens GN=FASN PE=1 SV=3	21	29	287	0.988
	P08238	HS90B_HUMAN Heat shock protein HSP 90_beta OS=Homo sapiens GN=HSP90AB1 PE=1 SV=4	20	50	973	0.983
	P07900	HS90A_HUMAN Heat shock protein HSP 90_alpha OS=Homo sapiens GN=HSP90AA1 PE=1 SV=5	20	52	964	0.95
	Q00610	CLH1_HUMAN Clathrin heavy chain 1 OS=Homo sapiens GN=CLTC PE=1 SV=5	18	28	274	1.082
	P06733	ENOA_HUMAN Alpha_enolase OS=Homo sapiens GN=ENO1 PE=1 SV=2	17	28	473	0.858
	P21333	FLNA_HUMAN Filamin_A OS=Homo sapiens GN=FLNA PE=1 SV=4	15	29	336	0.926
	P02545	LMNA_HUMAN Prelamin_A/C OS=Homo sapiens GN=LMNA PE=1 SV=1	14	22	275	1.616
	P13639	EF2_HUMAN Elongation factor 2 OS=Homo sapiens GN=EEF2 PE=1 SV=4	14	19	269	0.953
	P14618	KPYM_HUMAN Pyruvate kinase isozymes M1/M2 OS=Homo sapiens GN=PKM2 PE=1 SV=4	13	21	236	1.424
	P35579	MYH9_HUMAN Myosin_9 OS=Homo sapiens GN=MYH9 PE=1 SV=4	13	16	117	1.27
	P08670	VIME_HUMAN Vimentin OS=Homo sapiens GN=VIM PE=1 SV=4	13	25	453	1.163
	Q92598	HS105_HUMAN Heat shock protein 105 kDa OS=Homo sapiens GN=HSPH1 PE=1 SV=1	13	22	247	1.122
	P00558	PGK1_HUMAN Phosphoglycerate kinase 1 OS=Homo sapiens GN=PGK1 PE=1 SV=3	13	21	273	0.431
	O75369	FLNB_HUMAN Filamin_B OS=Homo sapiens GN=FLNB PE=1 SV=2	12	15	147	0.987
	P04406	G3P_HUMAN Glyceraldehyde_3_phosphate dehydrogenase OS=Homo sapiens GN=GAPDH PE=1 SV=3	12	34	512	0.639
	P29401	TKT_HUMAN Transketolase OS=Homo sapiens GN=TKT PE=1 SV=3	12	22	179	0.238
	P48643	TCPE_HUMAN T_complex protein 1 subunit epsilon OS=Homo sapiens GN=CCT5 PE=1 SV=1	11	13	147	1.224
	P34932	HSP74_HUMAN Heat shock 70 kDa protein 4 OS=Homo sapiens GN=HSPA4 PE=1 SV=4	11	17	183	1.162
	P23396	RS3_HUMAN 40S ribosomal protein S3 OS=Homo sapiens GN=RPS3 PE=1 SV=2	11	13	173	1.036
	Q14974	IMB1_HUMAN Importin subunit beta_1 OS=Homo sapiens GN=KPNB1 PE=1 SV=2	11	12	207	0.789
	P22314	UBA1_HUMAN Ubiquitin_like modifier_activating enzyme 1 OS=Homo sapiens GN=UBA1 PE=1 SV=3	10	19	214	1.083
	P11940	PABP1_HUMAN Polyadenylate_binding protein 1 OS=Homo sapiens GN=PABPC1 PE=1 SV=2	10	13	81	0.965
	P60842	IF4A1_HUMAN Eukaryotic initiation factor 4A_I OS=Homo sapiens GN=EIF4A1 PE=1 SV=1	10	18	228	0.938
	O43707	ACTN4_HUMAN Alpha_actinin_4 OS=Homo sapiens GN=ACTN4 PE=1 SV=2	10	14	135	0.861
	P78371	TCPB_HUMAN T_complex protein 1 subunit beta OS=Homo sapiens GN=CCT2 PE=1 SV=4	9	11	161	1.43
	P19338	NUCL_HUMAN Nucleolin OS=Homo sapiens GN=NCL PE=1 SV=3	9	13	163	1.287
	Q12906	ILF3_HUMAN Interleukin enhancer_binding factor 3 OS=Homo sapiens GN=ILF3 PE=1 SV=3	9	12	87	1.197
	P12956	XRCC6_HUMAN X_ray repair cross_complementing protein 6 OS=Homo sapiens GN=XRCC6 PE=1 SV=2	9	16	142	1.115
	Q8WZ42	TITIN_HUMAN Titin OS=Homo sapiens GN=TTN PE=1 SV=4	9	8	73	1.071
	P50395	GDIB_HUMAN Rab GDP dissociation inhibitor beta OS=Homo sapiens GN=GDI2 PE=1 SV=2	9	10	89	0.945
	P55060	XPO2_HUMAN Exportin_2 OS=Homo sapiens GN=CSE1L PE=1 SV=3	9	11	117	0.893
	P11142	HSP7C_HUMAN Heat shock cognate 71 kDa protein OS=Homo sapiens GN=HSPA8 PE=1 SV=1	9	12	80	0.774
	P60174	TPIS_HUMAN Triosephosphate isomerase OS=Homo sapiens GN=TPI1 PE=1 SV=3	9	18	174	0.613
	P22626	ROA2_HUMAN Heterogeneous nuclear ribonucleoproteins A2/B1 OS=Homo sapiens GN=HNRNPA2B1 PE=1 SV=2	8	13	147	1.393
	P68371	TBB4B_HUMAN Tubulin beta_4B chain OS=Homo sapiens GN=TUBB4B PE=1 SV=1	8	29	468	1.255
	P07437	TBB5_HUMAN Tubulin beta chain OS=Homo sapiens GN=TUBB PE=1 SV=2	8	30	487	1.205
	P11216	PYGB_HUMAN Glycogen phosphorylase_ brain form OS=Homo sapiens GN=PYGB PE=1 SV=5	8	12	110	1.158
	P62937	PPIA_HUMAN Peptidyl_prolyl cis_trans isomerase A OS=Homo sapiens GN=PPIA PE=1 SV=2	8	17	227	1.144
	P50990	TCPQ_HUMAN T_complex protein 1 subunit theta OS=Homo sapiens GN=CCT8 PE=1 SV=4	8	9	137	1.098
	Q15029	U5S1_HUMAN 116 kDa U5 small nuclear ribonucleoprotein component OS=Homo sapiens GN=EFTUD2 PE=1 SV=1	8	10	48	0.999
	Q58FF7	H90B3_HUMAN Putative heat shock protein HSP 90_beta_3 OS=Homo sapiens GN=HSP90AB3P PE=5 SV=1	8	24	401	0.966
	P12268	IMDH2_HUMAN Inosine_5__monophosphate dehydrogenase 2 OS=Homo sapiens GN=IMPDH2 PE=1 SV=2	8	13	113	0.841
	O00410	IPO5_HUMAN Importin_5 OS=Homo sapiens GN=IPO5 PE=1 SV=4	8	10	79	0.827
	Q86VP6	CAND1_HUMAN Cullin_associated NEDD8_dissociated protein 1 OS=Homo sapiens GN=CAND1 PE=1 SV=2	8	11	100	0.821
	P07195	LDHB_HUMAN L_lactate dehydrogenase B chain OS=Homo sapiens GN=LDHB PE=1 SV=2	8	12	152	0.321
	Q13509	TBB3_HUMAN Tubulin beta_3 chain OS=Homo sapiens GN=TUBB3 PE=1 SV=2	7	21	301	1.333
	P68104	EF1A1_HUMAN Elongation factor 1_alpha 1 OS=Homo sapiens GN=EEF1A1 PE=1 SV=1	7	30	460	1.275
	Q5VTE0	EF1A3_HUMAN Putative elongation factor 1_alpha_like 3 OS=Homo sapiens GN=EEF1A1P5 PE=5 SV=1	7	30	460	1.275
	Q13885	TBB2A_HUMAN Tubulin beta_2A chain OS=Homo sapiens GN=TUBB2A PE=1 SV=1	7	25	369	1.275
	Q9BVA1	TBB2B_HUMAN Tubulin beta_2B chain OS=Homo sapiens GN=TUBB2B PE=1 SV=1	7	25	369	1.275
	Q06830	PRDX1_HUMAN Peroxiredoxin_1 OS=Homo sapiens GN=PRDX1 PE=1 SV=1	7	11	117	1.12
	P05388	RLA0_HUMAN 60S acidic ribosomal protein P0 OS=Homo sapiens GN=RPLP0 PE=1 SV=1	7	9	62	1.104
	P06753	TPM3_HUMAN Tropomyosin alpha_3 chain OS=Homo sapiens GN=TPM3 PE=1 SV=1	7	10	106	1.06
	P17987	TCPA_HUMAN T_complex protein 1 subunit alpha OS=Homo sapiens GN=TCP1 PE=1 SV=1	7	9	103	1.056
	P68363	TBA1B_HUMAN Tubulin alpha_1B chain OS=Homo sapiens GN=TUBA1B PE=1 SV=1	7	11	199	1.03
	Q9BQE3	TBA1C_HUMAN Tubulin alpha_1C chain OS=Homo sapiens GN=TUBA1C PE=1 SV=1	7	11	199	1.03
	O00231	PSD11_HUMAN 26S proteasome non_ATPase regulatory subunit 11 OS=Homo sapiens GN=PSMD11 PE=1 SV=3	7	10	59	1.017
	P54136	SYRC_HUMAN Arginine__tRNA ligase_ cytoplasmic OS=Homo sapiens GN=RARS PE=1 SV=2	7	10	84	1.008
	Q58FF8	H90B2_HUMAN Putative heat shock protein HSP 90_beta 2 OS=Homo sapiens GN=HSP90AB2P PE=1 SV=2	7	17	320	0.901
	Q9Y490	TLN1_HUMAN Talin_1 OS=Homo sapiens GN=TLN1 PE=1 SV=3	7	9	65	0.883
	P47895	AL1A3_HUMAN Aldehyde dehydrogenase family 1 member A3 OS=Homo sapiens GN=ALDH1A3 PE=1 SV=2	7	9	80	0.763
	P08758	ANXA5_HUMAN Annexin A5 OS=Homo sapiens GN=ANXA5 PE=1 SV=2	7	14	134	0.549
	P00338	LDHA_HUMAN L_lactate dehydrogenase A chain OS=Homo sapiens GN=LDHA PE=1 SV=2	7	11	68	0.407
	Q05639	EF1A2_HUMAN Elongation factor 1_alpha 2 OS=Homo sapiens GN=EEF1A2 PE=1 SV=1	6	28	457	1.284
	P04350	TBB4A_HUMAN Tubulin beta_4A chain OS=Homo sapiens GN=TUBB4A PE=1 SV=2	6	23	375	1.25
	P17844	DDX5_HUMAN Probable ATP_dependent RNA helicase DDX5 OS=Homo sapiens GN=DDX5 PE=1 SV=1	6	7	64	1.211
	P07814	SYEP_HUMAN Bifunctional glutamate/proline__tRNA ligase OS=Homo sapiens GN=EPRS PE=1 SV=5	6	8	62	1.162
	P04075	ALDOA_HUMAN Fructose_bisphosphate aldolase A OS=Homo sapiens GN=ALDOA PE=1 SV=2	6	9	130	1.154
	P60709	ACTB_HUMAN Actin_ cytoplasmic 1 OS=Homo sapiens GN=ACTB PE=1 SV=1	6	21	374	1.142
	P63261	ACTG_HUMAN Actin_ cytoplasmic 2 OS=Homo sapiens GN=ACTG1 PE=1 SV=1	6	21	374	1.142
	Q9Y230	RUVB2_HUMAN RuvB_like 2 OS=Homo sapiens GN=RUVBL2 PE=1 SV=3	6	6	61	1.088
	Q71U36	TBA1A_HUMAN Tubulin alpha_1A chain OS=Homo sapiens GN=TUBA1A PE=1 SV=1	6	10	166	1.051
	Q9H361	PABP3_HUMAN Polyadenylate_binding protein 3 OS=Homo sapiens GN=PABPC3 PE=1 SV=2	6	7	49	1.05
	Q9Y3F4	STRAP_HUMAN Serine_threonine kinase receptor_associated protein OS=Homo sapiens GN=STRAP PE=1 SV=1	6	9	72	1.014
	P55072	TERA_HUMAN Transitional endoplasmic reticulum ATPase OS=Homo sapiens GN=VCP PE=1 SV=4	6	8	108	1.009
	P12081	SYHC_HUMAN Histidine__tRNA ligase_ cytoplasmic OS=Homo sapiens GN=HARS PE=1 SV=2	6	8	47	1.002
	P50991	TCPD_HUMAN T_complex protein 1 subunit delta OS=Homo sapiens GN=CCT4 PE=1 SV=4	6	7	119	0.912
	P12814	ACTN1_HUMAN Alpha_actinin_1 OS=Homo sapiens GN=ACTN1 PE=1 SV=2	6	7	52	0.814
	Q13813	SPTA2_HUMAN Spectrin alpha chain_ brain OS=Homo sapiens GN=SPTAN1 PE=1 SV=3	6	6	27	0.736
	P37802	TAGL2_HUMAN Transgelin_2 OS=Homo sapiens GN=TAGLN2 PE=1 SV=3	6	9	177	0.633
	Q8NF91	SYNE1_HUMAN Nesprin_1 OS=Homo sapiens GN=SYNE1 PE=1 SV=3	5	4	11	1.838
	Q00839	HNRPU_HUMAN Heterogeneous nuclear ribonucleoprotein U OS=Homo sapiens GN=HNRNPU PE=1 SV=6	5	8	84	1.389
	P09651	ROA1_HUMAN Heterogeneous nuclear ribonucleoprotein A1 OS=Homo sapiens GN=HNRNPA1 PE=1 SV=5	5	11	135	1.385
	Q32P51	RA1L2_HUMAN Heterogeneous nuclear ribonucleoprotein A1_like 2 OS=Homo sapiens GN=HNRNPA1L2 PE=2 SV=2	5	11	135	1.385
	P12004	PCNA_HUMAN Proliferating cell nuclear antigen OS=Homo sapiens GN=PCNA PE=1 SV=1	5	6	53	1.353
	Q08211	DHX9_HUMAN ATP_dependent RNA helicase A OS=Homo sapiens GN=DHX9 PE=1 SV=4	5	8	47	1.325
	P53675	CLH2_HUMAN Clathrin heavy chain 2 OS=Homo sapiens GN=CLTCL1 PE=1 SV=2	5	6	67	1.261
	O43175	SERA_HUMAN D_3_phosphoglycerate dehydrogenase OS=Homo sapiens GN=PHGDH PE=1 SV=4	5	5	49	1.215
	P13010	XRCC5_HUMAN X_ray repair cross_complementing protein 5 OS=Homo sapiens GN=XRCC5 PE=1 SV=3	5	8	48	1.21
	Q9BXJ9	NAA15_HUMAN N_alpha_acetyltransferase 15_ NatA auxiliary subunit OS=Homo sapiens GN=NAA15 PE=1 SV=1	5	6	18	1.208
	P09429	HMGB1_HUMAN High mobility group protein B1 OS=Homo sapiens GN=HMGB1 PE=1 SV=3	5	5	38	1.181
	P53396	ACLY_HUMAN ATP_citrate synthase OS=Homo sapiens GN=ACLY PE=1 SV=3	5	5	73	1.159
	P26038	MOES_HUMAN Moesin OS=Homo sapiens GN=MSN PE=1 SV=3	5	6	24	1.158
	P49915	GUAA_HUMAN GMP synthase [glutamine_hydrolyzing] OS=Homo sapiens GN=GMPS PE=1 SV=1	5	9	60	1.157
	P14868	SYDC_HUMAN Aspartate__tRNA ligase_ cytoplasmic OS=Homo sapiens GN=DARS PE=1 SV=2	5	6	52	1.153
	P62701	RS4X_HUMAN 40S ribosomal protein S4_ X isoform OS=Homo sapiens GN=RPS4X PE=1 SV=2	5	7	70	1.123
	P38919	IF4A3_HUMAN Eukaryotic initiation factor 4A_III OS=Homo sapiens GN=EIF4A3 PE=1 SV=4	5	6	46	1.108
	Q8NHW5	RLA0L_HUMAN 60S acidic ribosomal protein P0_like OS=Homo sapiens GN=RPLP0P6 PE=5 SV=1	5	6	47	1.103
	O15523	DDX3Y_HUMAN ATP_dependent RNA helicase DDX3Y OS=Homo sapiens GN=DDX3Y PE=1 SV=2	5	5	63	1.086
	O60506	HNRPQ_HUMAN Heterogeneous nuclear ribonucleoprotein Q OS=Homo sapiens GN=SYNCRIP PE=1 SV=2	5	6	68	1.075
	P22234	PUR6_HUMAN Multifunctional protein ADE2 OS=Homo sapiens GN=PAICS PE=1 SV=3	5	7	69	1.072
	Q14152	EIF3A_HUMAN Eukaryotic translation initiation factor 3 subunit A OS=Homo sapiens GN=EIF3A PE=1 SV=1	5	6	47	1.055
	O00571	DDX3X_HUMAN ATP_dependent RNA helicase DDX3X OS=Homo sapiens GN=DDX3X PE=1 SV=3	5	5	82	1.044
	P48681	NEST_HUMAN Nestin OS=Homo sapiens GN=NES PE=1 SV=2	5	6	21	1.04
	O95347	SMC2_HUMAN Structural maintenance of chromosomes protein 2 OS=Homo sapiens GN=SMC2 PE=1 SV=2	5	5	25	1.038
	P40227	TCPZ_HUMAN T_complex protein 1 subunit zeta OS=Homo sapiens GN=CCT6A PE=1 SV=3	5	8	100	1.028
	Q8WUM4	PDC6I_HUMAN Programmed cell death 6_interacting protein OS=Homo sapiens GN=PDCD6IP PE=1 SV=1	5	5	48	1.028
	P31153	METK2_HUMAN S_adenosylmethionine synthase isoform type_2 OS=Homo sapiens GN=MAT2A PE=1 SV=1	5	10	108	1.021
	P63244	GBLP_HUMAN Guanine nucleotide_binding protein subunit beta_2_like 1 OS=Homo sapiens GN=GNB2L1 PE=1 SV=3	5	9	101	1.017
	P27708	PYR1_HUMAN CAD protein OS=Homo sapiens GN=CAD PE=1 SV=3	5	7	67	0.993
	P62241	RS8_HUMAN 40S ribosomal protein S8 OS=Homo sapiens GN=RPS8 PE=1 SV=2	5	8	115	0.991
	Q07020	RL18_HUMAN 60S ribosomal protein L18 OS=Homo sapiens GN=RPL18 PE=1 SV=2	5	7	103	0.985
	P04083	ANXA1_HUMAN Annexin A1 OS=Homo sapiens GN=ANXA1 PE=1 SV=2	5	14	217	0.944
	Q13263	TIF1B_HUMAN Transcription intermediary factor 1_beta OS=Homo sapiens GN=TRIM28 PE=1 SV=5	5	8	114	0.935
	P31939	PUR9_HUMAN Bifunctional purine biosynthesis protein PURH OS=Homo sapiens GN=ATIC PE=1 SV=3	5	7	64	0.929
	Q14240	IF4A2_HUMAN Eukaryotic initiation factor 4A_II OS=Homo sapiens GN=EIF4A2 PE=1 SV=2	5	8	121	0.875
	P35998	PRS7_HUMAN 26S protease regulatory subunit 7 OS=Homo sapiens GN=PSMC2 PE=1 SV=3	5	5	45	0.84
	Q13765	NACA_HUMAN Nascent polypeptide_associated complex subunit alpha OS=Homo sapiens GN=NACA PE=1 SV=1	5	9	161	0.835
	P41250	SYG_HUMAN Glycine__tRNA ligase OS=Homo sapiens GN=GARS PE=1 SV=3	5	5	43	0.77
	P62195	PRS8_HUMAN 26S protease regulatory subunit 8 OS=Homo sapiens GN=PSMC5 PE=1 SV=1	5	6	23	0.656
	P62906	RL10A_HUMAN 60S ribosomal protein L10a OS=Homo sapiens GN=RPL10A PE=1 SV=2	5	10	80	0.455
	P07910	HNRPC_HUMAN Heterogeneous nuclear ribonucleoproteins C1/C2 OS=Homo sapiens GN=HNRNPC PE=1 SV=4	4	5	47	2.377
	Q99497	PARK7_HUMAN Protein DJ_1 OS=Homo sapiens GN=PARK7 PE=1 SV=2	4	4	29	1.897
	P30101	PDIA3_HUMAN Protein disulfide_isomerase A3 OS=Homo sapiens GN=PDIA3 PE=1 SV=4	4	4	17	1.743
	P61247	RS3A_HUMAN 40S ribosomal protein S3a OS=Homo sapiens GN=RPS3A PE=1 SV=2	4	4	31	1.727
	P31943	HNRH1_HUMAN Heterogeneous nuclear ribonucleoprotein H OS=Homo sapiens GN=HNRNPH1 PE=1 SV=4	4	6	63	1.52
	Q96JM2	ZN462_HUMAN Zinc finger protein 462 OS=Homo sapiens GN=ZNF462 PE=1 SV=3	4	6	15	1.46
	P30050	RL12_HUMAN 60S ribosomal protein L12 OS=Homo sapiens GN=RPL12 PE=1 SV=1	4	6	79	1.422
	P63104	1433Z_HUMAN 14_3_3 protein zeta/delta OS=Homo sapiens GN=YWHAZ PE=1 SV=1	4	6	111	1.407
	P15880	RS2_HUMAN 40S ribosomal protein S2 OS=Homo sapiens GN=RPS2 PE=1 SV=2	4	4	49	1.334
	P41252	SYIC_HUMAN Isoleucine__tRNA ligase_ cytoplasmic OS=Homo sapiens GN=IARS PE=1 SV=2	4	5	35	1.317
	P11021	GRP78_HUMAN 78 kDa glucose_regulated protein OS=Homo sapiens GN=HSPA5 PE=1 SV=2	4	5	35	1.313
	Q14204	DYHC1_HUMAN Cytoplasmic dynein 1 heavy chain 1 OS=Homo sapiens GN=DYNC1H1 PE=1 SV=5	4	4	16	1.305
	Q13347	EIF3I_HUMAN Eukaryotic translation initiation factor 3 subunit I OS=Homo sapiens GN=EIF3I PE=1 SV=1	4	4	43	1.267
	P67936	TPM4_HUMAN Tropomyosin alpha_4 chain OS=Homo sapiens GN=TPM4 PE=1 SV=3	4	9	74	1.248
	P56192	SYMC_HUMAN Methionine__tRNA ligase_ cytoplasmic OS=Homo sapiens GN=MARS PE=1 SV=2	4	4	16	1.243
	P30041	PRDX6_HUMAN Peroxiredoxin_6 OS=Homo sapiens GN=PRDX6 PE=1 SV=3	4	6	71	1.237
	Q99873	ANM1_HUMAN Protein arginine N_methyltransferase 1 OS=Homo sapiens GN=PRMT1 PE=1 SV=2	4	6	59	1.213
	P07951	TPM2_HUMAN Tropomyosin beta chain OS=Homo sapiens GN=TPM2 PE=1 SV=1	4	8	61	1.204
	O00148	DX39A_HUMAN ATP_dependent RNA helicase DDX39A OS=Homo sapiens GN=DDX39A PE=1 SV=2	4	4	36	1.196
	P62736	ACTA_HUMAN Actin_ aortic smooth muscle OS=Homo sapiens GN=ACTA2 PE=1 SV=1	4	14	239	1.181
	P63267	ACTH_HUMAN Actin_ gamma_enteric smooth muscle OS=Homo sapiens GN=ACTG2 PE=1 SV=1	4	14	239	1.181
	P68032	ACTC_HUMAN Actin_ alpha cardiac muscle 1 OS=Homo sapiens GN=ACTC1 PE=1 SV=1	4	14	239	1.181
	P68133	ACTS_HUMAN Actin_ alpha skeletal muscle OS=Homo sapiens GN=ACTA1 PE=1 SV=1	4	14	239	1.181
	P50502	F10A1_HUMAN Hsc70_interacting protein OS=Homo sapiens GN=ST13 PE=1 SV=2	4	6	54	1.179
	P31150	GDIA_HUMAN Rab GDP dissociation inhibitor alpha OS=Homo sapiens GN=GDI1 PE=1 SV=2	4	4	26	1.167
	P62851	RS25_HUMAN 40S ribosomal protein S25 OS=Homo sapiens GN=RPS25 PE=1 SV=1	4	8	43	1.162
	P61289	PSME3_HUMAN Proteasome activator complex subunit 3 OS=Homo sapiens GN=PSME3 PE=1 SV=1	4	6	54	1.151
	P62258	1433E_HUMAN 14_3_3 protein epsilon OS=Homo sapiens GN=YWHAE PE=1 SV=1	4	5	41	1.125
	Q562R1	ACTBL_HUMAN Beta_actin_like protein 2 OS=Homo sapiens GN=ACTBL2 PE=1 SV=2	4	17	293	1.104
	Q92841	DDX17_HUMAN Probable ATP_dependent RNA helicase DDX17 OS=Homo sapiens GN=DDX17 PE=1 SV=2	4	5	45	1.09
	P53621	COPA_HUMAN Coatomer subunit alpha OS=Homo sapiens GN=COPA PE=1 SV=2	4	5	39	1.087
	Q9Y262	EIF3L_HUMAN Eukaryotic translation initiation factor 3 subunit L OS=Homo sapiens GN=EIF3L PE=1 SV=1	4	4	38	1.075
	Q13748	TBA3C_HUMAN Tubulin alpha_3C/D chain OS=Homo sapiens GN=TUBA3C PE=1 SV=3	4	8	124	1.068
	Q6PEY2	TBA3E_HUMAN Tubulin alpha_3E chain OS=Homo sapiens GN=TUBA3E PE=1 SV=2	4	8	124	1.068
	P68366	TBA4A_HUMAN Tubulin alpha_4A chain OS=Homo sapiens GN=TUBA4A PE=1 SV=1	4	8	147	1.067
	Q9NY65	TBA8_HUMAN Tubulin alpha_8 chain OS=Homo sapiens GN=TUBA8 PE=1 SV=1	4	8	147	1.067
	O43242	PSMD3_HUMAN 26S proteasome non_ATPase regulatory subunit 3 OS=Homo sapiens GN=PSMD3 PE=1 SV=2	4	5	55	1.059
	Q13310	PABP4_HUMAN Polyadenylate_binding protein 4 OS=Homo sapiens GN=PABPC4 PE=1 SV=1	4	5	24	1.037
	Q15008	PSMD6_HUMAN 26S proteasome non_ATPase regulatory subunit 6 OS=Homo sapiens GN=PSMD6 PE=1 SV=1	4	8	67	1.032
	P30520	PURA2_HUMAN Adenylosuccinate synthetase isozyme 2 OS=Homo sapiens GN=ADSS PE=1 SV=3	4	4	52	1.03
	P53618	COPB_HUMAN Coatomer subunit beta OS=Homo sapiens GN=COPB1 PE=1 SV=3	4	6	17	1.021
	P05387	RLA2_HUMAN 60S acidic ribosomal protein P2 OS=Homo sapiens GN=RPLP2 PE=1 SV=1	4	8	95	1.01
	P46777	RL5_HUMAN 60S ribosomal protein L5 OS=Homo sapiens GN=RPL5 PE=1 SV=3	4	7	110	0.999
	Q01105	SET_HUMAN Protein SET OS=Homo sapiens GN=SET PE=1 SV=3	4	4	81	0.986
	Q12905	ILF2_HUMAN Interleukin enhancer_binding factor 2 OS=Homo sapiens GN=ILF2 PE=1 SV=2	4	6	29	0.985
	Q02878	RL6_HUMAN 60S ribosomal protein L6 OS=Homo sapiens GN=RPL6 PE=1 SV=3	4	5	51	0.984
	Q96TA1	NIBL1_HUMAN Niban_like protein 1 OS=Homo sapiens GN=FAM129B PE=1 SV=3	4	6	33	0.971
	P61981	1433G_HUMAN 14_3_3 protein gamma OS=Homo sapiens GN=YWHAG PE=1 SV=2	4	6	59	0.952
	P15311	EZRI_HUMAN Ezrin OS=Homo sapiens GN=EZR PE=1 SV=4	4	4	8	0.952
	P62280	RS11_HUMAN 40S ribosomal protein S11 OS=Homo sapiens GN=RPS11 PE=1 SV=3	4	7	41	0.951
	P31946	1433B_HUMAN 14_3_3 protein beta/alpha OS=Homo sapiens GN=YWHAB PE=1 SV=3	4	6	98	0.934
	Q14568	HS902_HUMAN Putative heat shock protein HSP 90_alpha A2 OS=Homo sapiens GN=HSP90AA2 PE=1 SV=2	4	13	264	0.929
	Q9Y617	SERC_HUMAN Phosphoserine aminotransferase OS=Homo sapiens GN=PSAT1 PE=1 SV=2	4	4	35	0.927
	Q09666	AHNK_HUMAN Neuroblast differentiation_associated protein AHNAK OS=Homo sapiens GN=AHNAK PE=1 SV=2	4	5	6	0.922
	Q16543	CDC37_HUMAN Hsp90 co_chaperone Cdc37 OS=Homo sapiens GN=CDC37 PE=1 SV=1	4	5	66	0.907
	O00303	EIF3F_HUMAN Eukaryotic translation initiation factor 3 subunit F OS=Homo sapiens GN=EIF3F PE=1 SV=1	4	5	43	0.903
	Q70CQ2	UBP34_HUMAN Ubiquitin carboxyl_terminal hydrolase 34 OS=Homo sapiens GN=USP34 PE=1 SV=2	4	4	5	0.901
	P31948	STIP1_HUMAN Stress_induced_phosphoprotein 1 OS=Homo sapiens GN=STIP1 PE=1 SV=1	4	9	120	0.9
	Q9P2J5	SYLC_HUMAN Leucine__tRNA ligase_ cytoplasmic OS=Homo sapiens GN=LARS PE=1 SV=2	4	4	33	0.892
	P47756	CAPZB_HUMAN F_actin_capping protein subunit beta OS=Homo sapiens GN=CAPZB PE=1 SV=4	4	4	36	0.878
	Q9UQ80	PA2G4_HUMAN Proliferation_associated protein 2G4 OS=Homo sapiens GN=PA2G4 PE=1 SV=3	4	6	83	0.857
	P46940	IQGA1_HUMAN Ras GTPase_activating_like protein IQGAP1 OS=Homo sapiens GN=IQGAP1 PE=1 SV=1	4	4	46	0.856
	Q6P2Q9	PRP8_HUMAN Pre_mRNA_processing_splicing factor 8 OS=Homo sapiens GN=PRPF8 PE=1 SV=2	4	3	11	0.842
	P41091	IF2G_HUMAN Eukaryotic translation initiation factor 2 subunit 3 OS=Homo sapiens GN=EIF2S3 PE=1 SV=3	4	8	62	0.813
	P23381	SYWC_HUMAN Tryptophan__tRNA ligase_ cytoplasmic OS=Homo sapiens GN=WARS PE=1 SV=2	4	5	24	0.806
	Q15365	PCBP1_HUMAN Poly(rC)_binding protein 1 OS=Homo sapiens GN=PCBP1 PE=1 SV=2	4	5	83	0.797
	P07737	PROF1_HUMAN Profilin_1 OS=Homo sapiens GN=PFN1 PE=1 SV=2	4	11	229	0.78
	Q01082	SPTB2_HUMAN Spectrin beta chain_ brain 1 OS=Homo sapiens GN=SPTBN1 PE=1 SV=2	4	5	31	0.752
	P18669	PGAM1_HUMAN Phosphoglycerate mutase 1 OS=Homo sapiens GN=PGAM1 PE=1 SV=2	4	8	83	0.735
	P26641	EF1G_HUMAN Elongation factor 1_gamma OS=Homo sapiens GN=EEF1G PE=1 SV=3	4	6	49	0.648
	P06744	G6PI_HUMAN Glucose_6_phosphate isomerase OS=Homo sapiens GN=GPI PE=1 SV=4	4	4	19	0.318
	P22087	FBRL_HUMAN rRNA 2__O_methyltransferase fibrillarin OS=Homo sapiens GN=FBL PE=1 SV=2	3	4	21	4.862
	P38159	RBMX_HUMAN RNA_binding motif protein_ X chromosome OS=Homo sapiens GN=RBMX PE=1 SV=3	3	3	39	2.614
	Q96E39	RMXL1_HUMAN RNA binding motif protein_ X_linked_like_1 OS=Homo sapiens GN=RBMXL1 PE=1 SV=1	3	3	45	1.97
	P50914	RL14_HUMAN 60S ribosomal protein L14 OS=Homo sapiens GN=RPL14 PE=1 SV=4	3	3	36	1.895
	Q99733	NP1L4_HUMAN Nucleosome assembly protein 1_like 4 OS=Homo sapiens GN=NAP1L4 PE=1 SV=1	3	3	45	1.621
	P13929	ENOB_HUMAN Beta_enolase OS=Homo sapiens GN=ENO3 PE=1 SV=4	3	6	161	1.609
	P55209	NP1L1_HUMAN Nucleosome assembly protein 1_like 1 OS=Homo sapiens GN=NAP1L1 PE=1 SV=1	3	4	54	1.573
	P61978	HNRPK_HUMAN Heterogeneous nuclear ribonucleoprotein K OS=Homo sapiens GN=HNRNPK PE=1 SV=1	3	4	85	1.561
	P52272	HNRPM_HUMAN Heterogeneous nuclear ribonucleoprotein M OS=Homo sapiens GN=HNRNPM PE=1 SV=3	3	3	13	1.558
	Q13185	CBX3_HUMAN Chromobox protein homolog 3 OS=Homo sapiens GN=CBX3 PE=1 SV=4	3	4	45	1.525
	O43390	HNRPR_HUMAN Heterogeneous nuclear ribonucleoprotein R OS=Homo sapiens GN=HNRNPR PE=1 SV=1	3	3	32	1.525
	P23246	SFPQ_HUMAN Splicing factor_ proline_ and glutamine_rich OS=Homo sapiens GN=SFPQ PE=1 SV=2	3	3	29	1.519
	P53999	TCP4_HUMAN Activated RNA polymerase II transcriptional coactivator p15 OS=Homo sapiens GN=SUB1 PE=1 SV=3	3	3	28	1.482
	Q9Y3I0	RTCB_HUMAN tRNA_splicing ligase RtcB homolog OS=Homo sapiens GN=C22orf28 PE=1 SV=1	3	3	4	1.445
	O43143	DHX15_HUMAN Putative pre_mRNA_splicing factor ATP_dependent RNA helicase DHX15 OS=Homo sapiens GN=DHX15 PE=1 SV=2	3	3	31	1.429
	Q96RW7	HMCN1_HUMAN Hemicentin_1 OS=Homo sapiens GN=HMCN1 PE=1 SV=2	3	4	12	1.418
	P55795	HNRH2_HUMAN Heterogeneous nuclear ribonucleoprotein H2 OS=Homo sapiens GN=HNRNPH2 PE=1 SV=1	3	5	62	1.398
	P36578	RL4_HUMAN 60S ribosomal protein L4 OS=Homo sapiens GN=RPL4 PE=1 SV=5	3	3	24	1.379
	P46060	RAGP1_HUMAN Ran GTPase_activating protein 1 OS=Homo sapiens GN=RANGAP1 PE=1 SV=1	3	3	37	1.355
	P62917	RL8_HUMAN 60S ribosomal protein L8 OS=Homo sapiens GN=RPL8 PE=1 SV=2	3	6	73	1.345
	P13667	PDIA4_HUMAN Protein disulfide_isomerase A4 OS=Homo sapiens GN=PDIA4 PE=1 SV=2	3	2	14	1.321
	Q8NFI4	F10A5_HUMAN Putative protein FAM10A5 OS=Homo sapiens GN=ST13P5 PE=5 SV=1	3	4	33	1.318
	P62249	RS16_HUMAN 40S ribosomal protein S16 OS=Homo sapiens GN=RPS16 PE=1 SV=2	3	4	37	1.317
	Q9NYF8	BCLF1_HUMAN Bcl_2_associated transcription factor 1 OS=Homo sapiens GN=BCLAF1 PE=1 SV=2	3	3	3	1.307
	Q9C0D4	Z518B_HUMAN Zinc finger protein 518B OS=Homo sapiens GN=ZNF518B PE=2 SV=2	3	3	3	1.294
	P62826	RAN_HUMAN GTP_binding nuclear protein Ran OS=Homo sapiens GN=RAN PE=1 SV=3	3	3	87	1.287
	Q13838	DX39B_HUMAN Spliceosome RNA helicase DDX39B OS=Homo sapiens GN=DDX39B PE=1 SV=1	3	3	19	1.28
	Q7Z5P9	MUC19_HUMAN Mucin_19 OS=Homo sapiens GN=MUC19 PE=1 SV=2	3	3	3	1.265
	P07954	FUMH_HUMAN Fumarate hydratase_ mitochondrial OS=Homo sapiens GN=FH PE=1 SV=3	3	4	37	1.248
	P42677	RS27_HUMAN 40S ribosomal protein S27 OS=Homo sapiens GN=RPS27 PE=1 SV=3	3	4	33	1.24
	Q9Y265	RUVB1_HUMAN RuvB_like 1 OS=Homo sapiens GN=RUVBL1 PE=1 SV=1	3	3	37	1.225
	Q9HCK8	CHD8_HUMAN Chromodomain_helicase_DNA_binding protein 8 OS=Homo sapiens GN=CHD8 PE=1 SV=5	3	3	3	1.218
	Q13435	SF3B2_HUMAN Splicing factor 3B subunit 2 OS=Homo sapiens GN=SF3B2 PE=1 SV=2	3	5	18	1.191
	A5A3E0	POTEF_HUMAN POTE ankyrin domain family member F OS=Homo sapiens GN=POTEF PE=1 SV=2	3	12	241	1.186
	Q6S8J3	POTEE_HUMAN POTE ankyrin domain family member E OS=Homo sapiens GN=POTEE PE=1 SV=3	3	12	241	1.186
	Q9BYX7	ACTBM_HUMAN Putative beta_actin_like protein 3 OS=Homo sapiens GN=POTEKP PE=5 SV=1	3	12	241	1.186
	Q9UMS4	PRP19_HUMAN Pre_mRNA_processing factor 19 OS=Homo sapiens GN=PRPF19 PE=1 SV=1	3	4	57	1.182
	O14737	PDCD5_HUMAN Programmed cell death protein 5 OS=Homo sapiens GN=PDCD5 PE=1 SV=3	3	3	29	1.182
	P11217	PYGM_HUMAN Glycogen phosphorylase_ muscle form OS=Homo sapiens GN=PYGM PE=1 SV=6	3	3	10	1.168
	P18621	RL17_HUMAN 60S ribosomal protein L17 OS=Homo sapiens GN=RPL17 PE=1 SV=3	3	4	48	1.149
	P08865	RSSA_HUMAN 40S ribosomal protein SA OS=Homo sapiens GN=RPSA PE=1 SV=4	3	5	71	1.147
	O75643	U520_HUMAN U5 small nuclear ribonucleoprotein 200 kDa helicase OS=Homo sapiens GN=SNRNP200 PE=1 SV=2	3	3	37	1.143
	P68400	CSK21_HUMAN Casein kinase II subunit alpha OS=Homo sapiens GN=CSNK2A1 PE=1 SV=1	3	4	42	1.142
	P35749	MYH11_HUMAN Myosin_11 OS=Homo sapiens GN=MYH11 PE=1 SV=3	3	3	28	1.136
	P15170	ERF3A_HUMAN Eukaryotic peptide chain release factor GTP_binding subunit ERF3A OS=Homo sapiens GN=GSPT1 PE=1 SV=1	3	3	23	1.134
	Q9NR45	SIAS_HUMAN Sialic acid synthase OS=Homo sapiens GN=NANS PE=1 SV=2	3	4	22	1.12
	P37837	TALDO_HUMAN Transaldolase OS=Homo sapiens GN=TALDO1 PE=1 SV=2	3	3	8	1.118
	O15143	ARC1B_HUMAN Actin_related protein 2/3 complex subunit 1B OS=Homo sapiens GN=ARPC1B PE=1 SV=3	3	3	23	1.113
	B2RPK0	HGB1A_HUMAN Putative high mobility group protein B1_like 1 OS=Homo sapiens GN=HMGB1P1 PE=5 SV=1	3	4	15	1.104
	O95831	AIFM1_HUMAN Apoptosis_inducing factor 1_ mitochondrial OS=Homo sapiens GN=AIFM1 PE=1 SV=1	3	3	11	1.099
	O00154	BACH_HUMAN Cytosolic acyl coenzyme A thioester hydrolase OS=Homo sapiens GN=ACOT7 PE=1 SV=3	3	4	39	1.097
	Q9BUF5	TBB6_HUMAN Tubulin beta_6 chain OS=Homo sapiens GN=TUBB6 PE=1 SV=1	3	5	65	1.093
	P25205	MCM3_HUMAN DNA replication licensing factor MCM3 OS=Homo sapiens GN=MCM3 PE=1 SV=3	3	3	19	1.091
	Q4VXU2	PAP1L_HUMAN Polyadenylate_binding protein 1_like OS=Homo sapiens GN=PABPC1L PE=2 SV=1	3	3	13	1.085
	P18085	ARF4_HUMAN ADP_ribosylation factor 4 OS=Homo sapiens GN=ARF4 PE=1 SV=3	3	5	48	1.078
	P30044	PRDX5_HUMAN Peroxiredoxin_5_ mitochondrial OS=Homo sapiens GN=PRDX5 PE=1 SV=4	3	4	33	1.074
	Q15911	ZFHX3_HUMAN Zinc finger homeobox protein 3 OS=Homo sapiens GN=ZFHX3 PE=1 SV=2	3	3	5	1.074
	P43358	MAGA4_HUMAN Melanoma_associated antigen 4 OS=Homo sapiens GN=MAGEA4 PE=1 SV=2	3	7	115	1.06
	P49368	TCPG_HUMAN T_complex protein 1 subunit gamma OS=Homo sapiens GN=CCT3 PE=1 SV=4	3	3	79	1.056
	Q9NTK5	OLA1_HUMAN Obg_like ATPase 1 OS=Homo sapiens GN=OLA1 PE=1 SV=2	3	3	25	1.055
	P21980	TGM2_HUMAN Protein_glutamine gamma_glutamyltransferase 2 OS=Homo sapiens GN=TGM2 PE=1 SV=2	3	3	22	1.048
	P14625	ENPL_HUMAN Endoplasmin OS=Homo sapiens GN=HSP90B1 PE=1 SV=1	3	5	46	1.04
	P47897	SYQ_HUMAN Glutamine__tRNA ligase OS=Homo sapiens GN=QARS PE=1 SV=1	3	5	29	1.034
	P49321	NASP_HUMAN Nuclear autoantigenic sperm protein OS=Homo sapiens GN=NASP PE=1 SV=2	3	4	41	1.027
	P54577	SYYC_HUMAN Tyrosine__tRNA ligase_ cytoplasmic OS=Homo sapiens GN=YARS PE=1 SV=4	3	3	10	1.027
	Q7Z406	MYH14_HUMAN Myosin_14 OS=Homo sapiens GN=MYH14 PE=1 SV=2	3	4	34	1.024
	P22102	PUR2_HUMAN Trifunctional purine biosynthetic protein adenosine_3 OS=Homo sapiens GN=GART PE=1 SV=1	3	5	27	1.024
	P60866	RS20_HUMAN 40S ribosomal protein S20 OS=Homo sapiens GN=RPS20 PE=1 SV=1	3	7	123	1.023
	P62424	RL7A_HUMAN 60S ribosomal protein L7a OS=Homo sapiens GN=RPL7A PE=1 SV=2	3	4	17	1.018
	Q58FG1	HS904_HUMAN Putative heat shock protein HSP 90_alpha A4 OS=Homo sapiens GN=HSP90AA4P PE=5 SV=1	3	14	281	1.013
	P45974	UBP5_HUMAN Ubiquitin carboxyl_terminal hydrolase 5 OS=Homo sapiens GN=USP5 PE=1 SV=2	3	5	23	1.013
	P09104	ENOG_HUMAN Gamma_enolase OS=Homo sapiens GN=ENO2 PE=1 SV=3	3	7	173	1.012
	Q8NEV8	EXPH5_HUMAN Exophilin_5 OS=Homo sapiens GN=EXPH5 PE=1 SV=3	3	4	4	1.01
	Q14247	SRC8_HUMAN Src substrate cortactin OS=Homo sapiens GN=CTTN PE=1 SV=2	3	3	25	1
	Q9UDT6	CLIP2_HUMAN CAP_Gly domain_containing linker protein 2 OS=Homo sapiens GN=CLIP2 PE=1 SV=1	3	4	8	0.988
	P61160	ARP2_HUMAN Actin_related protein 2 OS=Homo sapiens GN=ACTR2 PE=1 SV=1	3	4	27	0.985
	P39687	AN32A_HUMAN Acidic leucine_rich nuclear phosphoprotein 32 family member A OS=Homo sapiens GN=ANP32A PE=1 SV=1	3	4	33	0.984
	P52597	HNRPF_HUMAN Heterogeneous nuclear ribonucleoprotein F OS=Homo sapiens GN=HNRNPF PE=1 SV=3	3	3	30	0.977
	Q92688	AN32B_HUMAN Acidic leucine_rich nuclear phosphoprotein 32 family member B OS=Homo sapiens GN=ANP32B PE=1 SV=1	3	4	21	0.977
	P08237	K6PF_HUMAN 6_phosphofructokinase_ muscle type OS=Homo sapiens GN=PFKM PE=1 SV=2	3	4	33	0.972
	O95373	IPO7_HUMAN Importin_7 OS=Homo sapiens GN=IPO7 PE=1 SV=1	3	4	48	0.971
	Q01518	CAP1_HUMAN Adenylyl cyclase_associated protein 1 OS=Homo sapiens GN=CAP1 PE=1 SV=5	3	3	56	0.959
	Q58FG0	HS905_HUMAN Putative heat shock protein HSP 90_alpha A5 OS=Homo sapiens GN=HSP90AA5P PE=1 SV=1	3	4	67	0.957
	Q5TZA2	CROCC_HUMAN Rootletin OS=Homo sapiens GN=CROCC PE=1 SV=1	3	4	24	0.936
	Q7L014	DDX46_HUMAN Probable ATP_dependent RNA helicase DDX46 OS=Homo sapiens GN=DDX46 PE=1 SV=2	3	2	22	0.934
	O15078	CE290_HUMAN Centrosomal protein of 290 kDa OS=Homo sapiens GN=CEP290 PE=1 SV=2	3	3	3	0.928
	Q9Y566	SHAN1_HUMAN SH3 and multiple ankyrin repeat domains protein 1 OS=Homo sapiens GN=SHANK1 PE=1 SV=2	3	3	5	0.916
	P54652	HSP72_HUMAN Heat shock_related 70 kDa protein 2 OS=Homo sapiens GN=HSPA2 PE=1 SV=1	3	4	24	0.902
	O95477	ABCA1_HUMAN ATP_binding cassette sub_family A member 1 OS=Homo sapiens GN=ABCA1 PE=1 SV=3	3	3	5	0.899
	P62191	PRS4_HUMAN 26S protease regulatory subunit 4 OS=Homo sapiens GN=PSMC1 PE=1 SV=1	3	3	29	0.896
	Q13200	PSMD2_HUMAN 26S proteasome non_ATPase regulatory subunit 2 OS=Homo sapiens GN=PSMD2 PE=1 SV=3	3	4	28	0.895
	Q7Z6Z7	HUWE1_HUMAN E3 ubiquitin_protein ligase HUWE1 OS=Homo sapiens GN=HUWE1 PE=1 SV=3	3	3	5	0.885
	P48444	COPD_HUMAN Coatomer subunit delta OS=Homo sapiens GN=ARCN1 PE=1 SV=1	3	4	32	0.876
	P30153	2AAA_HUMAN Serine/threonine_protein phosphatase 2A 65 kDa regulatory subunit A alpha isoform OS=Homo sapiens GN=PPP2R1A PE=1 SV=4	3	4	21	0.865
	Q9BYT3	STK33_HUMAN Serine/threonine_protein kinase 33 OS=Homo sapiens GN=STK33 PE=1 SV=1	3	3	4	0.862
	P62081	RS7_HUMAN 40S ribosomal protein S7 OS=Homo sapiens GN=RPS7 PE=1 SV=1	3	3	26	0.856
	O60664	PLIN3_HUMAN Perilipin_3 OS=Homo sapiens GN=PLIN3 PE=1 SV=3	3	4	31	0.853
	P46926	GNPI1_HUMAN Glucosamine_6_phosphate isomerase 1 OS=Homo sapiens GN=GNPDA1 PE=1 SV=1	3	4	15	0.846
	P62899	RL31_HUMAN 60S ribosomal protein L31 OS=Homo sapiens GN=RPL31 PE=1 SV=1	3	4	26	0.824
	Q2VIR3	IF2GL_HUMAN Putative eukaryotic translation initiation factor 2 subunit 3_like protein OS=Homo sapiens GN=EIF2S3L PE=5 SV=2	3	5	48	0.786
	P16989	DBPA_HUMAN DNA_binding protein A OS=Homo sapiens GN=CSDA PE=1 SV=4	3	6	54	0.778
	Q9BXX3	AN30A_HUMAN Ankyrin repeat domain_containing protein 30A OS=Homo sapiens GN=ANKRD30A PE=1 SV=3	3	3	5	0.777
	Q96LP6	CL042_HUMAN Uncharacterized protein C12orf42 OS=Homo sapiens GN=C12orf42 PE=2 SV=2	3	2	8	0.763
	P35241	RADI_HUMAN Radixin OS=Homo sapiens GN=RDX PE=1 SV=1	3	3	7	0.76
	P67809	YBOX1_HUMAN Nuclease_sensitive element_binding protein 1 OS=Homo sapiens GN=YBX1 PE=1 SV=3	3	7	87	0.758
	Q15393	SF3B3_HUMAN Splicing factor 3B subunit 3 OS=Homo sapiens GN=SF3B3 PE=1 SV=4	3	3	38	0.622
	P60900	PSA6_HUMAN Proteasome subunit alpha type_6 OS=Homo sapiens GN=PSMA6 PE=1 SV=1	3	5	12	0.547
	P22392	NDKB_HUMAN Nucleoside diphosphate kinase B OS=Homo sapiens GN=NME2 PE=1 SV=1	3	8	89	0.485
	P07205	PGK2_HUMAN Phosphoglycerate kinase 2 OS=Homo sapiens GN=PGK2 PE=1 SV=3	3	6	92	0.439
	P62318	SMD3_HUMAN Small nuclear ribonucleoprotein Sm D3 OS=Homo sapiens GN=SNRPD3 PE=1 SV=1	3	3	19	0.22
	P49721	PSB2_HUMAN Proteasome subunit beta type_2 OS=Homo sapiens GN=PSMB2 PE=1 SV=1	3	4	17	0.135
	P00505	AATM_HUMAN Aspartate aminotransferase_ mitochondrial OS=Homo sapiens GN=GOT2 PE=1 SV=3	2	3	9	2.531
	P0C0S8	H2A1_HUMAN Histone H2A type 1 OS=Homo sapiens GN=HIST1H2AG PE=1 SV=2	2	2	8	2.474
	P20671	H2A1D_HUMAN Histone H2A type 1_D OS=Homo sapiens GN=HIST1H2AD PE=1 SV=2	2	2	8	2.474
	Q16777	H2A2C_HUMAN Histone H2A type 2_C OS=Homo sapiens GN=HIST2H2AC PE=1 SV=4	2	2	8	2.474
	Q6FI13	H2A2A_HUMAN Histone H2A type 2_A OS=Homo sapiens GN=HIST2H2AA3 PE=1 SV=3	2	2	8	2.474
	Q96KK5	H2A1H_HUMAN Histone H2A type 1_H OS=Homo sapiens GN=HIST1H2AH PE=1 SV=3	2	2	8	2.474
	Q99878	H2A1J_HUMAN Histone H2A type 1_J OS=Homo sapiens GN=HIST1H2AJ PE=1 SV=3	2	2	8	2.474
	Q9BTM1	H2AJ_HUMAN Histone H2A.J OS=Homo sapiens GN=H2AFJ PE=1 SV=1	2	2	8	2.474
	P78364	PHC1_HUMAN Polyhomeotic_like protein 1 OS=Homo sapiens GN=PHC1 PE=1 SV=3	2	1	2	2.452
	Q96AA8	JKIP2_HUMAN Janus kinase and microtubule_interacting protein 2 OS=Homo sapiens GN=JAKMIP2 PE=2 SV=1	2	1	12	2.158
	Q04917	1433F_HUMAN 14_3_3 protein eta OS=Homo sapiens GN=YWHAH PE=1 SV=4	2	2	14	2.026
	P13693	TCTP_HUMAN Translationally_controlled tumor protein OS=Homo sapiens GN=TPT1 PE=1 SV=1	2	2	17	1.904
	Q99729	ROAA_HUMAN Heterogeneous nuclear ribonucleoprotein A/B OS=Homo sapiens GN=HNRNPAB PE=1 SV=2	2	4	22	1.897
	Q5M9N0	CD158_HUMAN Coiled_coil domain_containing protein 158 OS=Homo sapiens GN=CCDC158 PE=2 SV=2	2	3	6	1.872
	P62910	RL32_HUMAN 60S ribosomal protein L32 OS=Homo sapiens GN=RPL32 PE=1 SV=2	2	2	33	1.813
	Q9NR30	DDX21_HUMAN Nucleolar RNA helicase 2 OS=Homo sapiens GN=DDX21 PE=1 SV=5	2	2	6	1.813
	P46783	RS10_HUMAN 40S ribosomal protein S10 OS=Homo sapiens GN=RPS10 PE=1 SV=1	2	5	22	1.797
	Q9NQ39	RS10L_HUMAN Putative 40S ribosomal protein S10_like OS=Homo sapiens GN=RPS10P5 PE=5 SV=1	2	5	22	1.797
	O60812	HNRCL_HUMAN Heterogeneous nuclear ribonucleoprotein C_like 1 OS=Homo sapiens GN=HNRNPCL1 PE=1 SV=1	2	3	21	1.775
	P09382	LEG1_HUMAN Galectin_1 OS=Homo sapiens GN=LGALS1 PE=1 SV=2	2	3	79	1.73
	O14979	HNRDL_HUMAN Heterogeneous nuclear ribonucleoprotein D_like OS=Homo sapiens GN=HNRPDL PE=1 SV=3	2	2	2	1.692
	Q9UL46	PSME2_HUMAN Proteasome activator complex subunit 2 OS=Homo sapiens GN=PSME2 PE=1 SV=4	2	3	26	1.666
	Q9Y2X3	NOP58_HUMAN Nucleolar protein 58 OS=Homo sapiens GN=NOP58 PE=1 SV=1	2	2	2	1.658
	P39023	RL3_HUMAN 60S ribosomal protein L3 OS=Homo sapiens GN=RPL3 PE=1 SV=2	2	4	16	1.65
	P23378	GCSP_HUMAN Glycine dehydrogenase [decarboxylating]_ mitochondrial OS=Homo sapiens GN=GLDC PE=1 SV=2	2	1	2	1.632
	Q96T17	MA7D2_HUMAN MAP7 domain_containing protein 2 OS=Homo sapiens GN=MAP7D2 PE=1 SV=2	2	2	28	1.619
	Q14677	EPN4_HUMAN Clathrin interactor 1 OS=Homo sapiens GN=CLINT1 PE=1 SV=1	2	2	3	1.612
	P52292	IMA2_HUMAN Importin subunit alpha_2 OS=Homo sapiens GN=KPNA2 PE=1 SV=1	2	2	14	1.597
	P11413	G6PD_HUMAN Glucose_6_phosphate 1_dehydrogenase OS=Homo sapiens GN=G6PD PE=1 SV=4	2	2	3	1.594
	Q07666	KHDR1_HUMAN KH domain_containing_ RNA_binding_ signal transduction_associated protein 1 OS=Homo sapiens GN=KHDRBS1 PE=1 SV=1	2	3	8	1.588
	P12270	TPR_HUMAN Nucleoprotein TPR OS=Homo sapiens GN=TPR PE=1 SV=3	2	2	2	1.566
	Q9NYQ6	CELR1_HUMAN Cadherin EGF LAG seven_pass G_type receptor 1 OS=Homo sapiens GN=CELSR1 PE=1 SV=1	2	2	3	1.565
	P55036	PSMD4_HUMAN 26S proteasome non_ATPase regulatory subunit 4 OS=Homo sapiens GN=PSMD4 PE=1 SV=1	2	2	20	1.547
	Q92859	NEO1_HUMAN Neogenin OS=Homo sapiens GN=NEO1 PE=1 SV=2	2	3	8	1.525
	Q16629	SRSF7_HUMAN Serine/arginine_rich splicing factor 7 OS=Homo sapiens GN=SRSF7 PE=1 SV=1	2	2	26	1.518
	P62269	RS18_HUMAN 40S ribosomal protein S18 OS=Homo sapiens GN=RPS18 PE=1 SV=3	2	2	34	1.491
	Q8IZP2	ST134_HUMAN Putative protein FAM10A4 OS=Homo sapiens GN=ST13P4 PE=5 SV=1	2	3	32	1.482
	Q8TE57	ATS16_HUMAN A disintegrin and metalloproteinase with thrombospondin motifs 16 OS=Homo sapiens GN=ADAMTS16 PE=1 SV=3	2	2	7	1.428
	O75116	ROCK2_HUMAN Rho_associated protein kinase 2 OS=Homo sapiens GN=ROCK2 PE=1 SV=4	2	2	4	1.426
	Q9Y263	PLAP_HUMAN Phospholipase A_2_activating protein OS=Homo sapiens GN=PLAA PE=1 SV=2	2	2	15	1.414
	Q5VUA4	ZN318_HUMAN Zinc finger protein 318 OS=Homo sapiens GN=ZNF318 PE=1 SV=2	2	2	6	1.414
	O43684	BUB3_HUMAN Mitotic checkpoint protein BUB3 OS=Homo sapiens GN=BUB3 PE=1 SV=1	2	2	7	1.395
	Q6NZI2	PTRF_HUMAN Polymerase I and transcript release factor OS=Homo sapiens GN=PTRF PE=1 SV=1	2	2	10	1.382
	O14920	IKKB_HUMAN Inhibitor of nuclear factor kappa_B kinase subunit beta OS=Homo sapiens GN=IKBKB PE=1 SV=1	2	2	2	1.378
	Q2TAY7	SMU1_HUMAN WD40 repeat_containing protein SMU1 OS=Homo sapiens GN=SMU1 PE=1 SV=2	2	3	9	1.375
	Q9BZF9	UACA_HUMAN Uveal autoantigen with coiled_coil domains and ankyrin repeats OS=Homo sapiens GN=UACA PE=1 SV=2	2	2	5	1.363
	Q9Y2V7	COG6_HUMAN Conserved oligomeric Golgi complex subunit 6 OS=Homo sapiens GN=COG6 PE=2 SV=2	2	2	2	1.361
	Q71UM5	RS27L_HUMAN 40S ribosomal protein S27_like OS=Homo sapiens GN=RPS27L PE=1 SV=3	2	2	30	1.359
	Q8WXX0	DYH7_HUMAN Dynein heavy chain 7_ axonemal OS=Homo sapiens GN=DNAH7 PE=1 SV=2	2	2	8	1.357
	P32119	PRDX2_HUMAN Peroxiredoxin_2 OS=Homo sapiens GN=PRDX2 PE=1 SV=5	2	2	7	1.357
	Q12767	K0195_HUMAN Uncharacterized protein KIAA0195 OS=Homo sapiens GN=KIAA0195 PE=1 SV=1	2	2	3	1.342
	Q7Z3E2	CJ118_HUMAN Uncharacterized protein C10orf118 OS=Homo sapiens GN=C10orf118 PE=2 SV=2	2	2	4	1.339
	Q5VT06	CE350_HUMAN Centrosome_associated protein 350 OS=Homo sapiens GN=CEP350 PE=1 SV=1	2	2	2	1.339
	Q96CN4	EVI5L_HUMAN EVI5_like protein OS=Homo sapiens GN=EVI5L PE=1 SV=1	2	2	2	1.339
	Q15431	SYCP1_HUMAN Synaptonemal complex protein 1 OS=Homo sapiens GN=SYCP1 PE=1 SV=2	2	1	5	1.324
	P60660	MYL6_HUMAN Myosin light polypeptide 6 OS=Homo sapiens GN=MYL6 PE=1 SV=2	2	2	43	1.322
	Q96QU8	XPO6_HUMAN Exportin_6 OS=Homo sapiens GN=XPO6 PE=1 SV=1	2	2	2	1.322
	Q99996	AKAP9_HUMAN A_kinase anchor protein 9 OS=Homo sapiens GN=AKAP9 PE=1 SV=3	2	2	8	1.318
	Q9Y2F5	K0947_HUMAN Uncharacterized protein KIAA0947 OS=Homo sapiens GN=KIAA0947 PE=1 SV=5	2	2	2	1.312
	P27348	1433T_HUMAN 14_3_3 protein theta OS=Homo sapiens GN=YWHAQ PE=1 SV=1	2	2	14	1.309
	P26583	HMGB2_HUMAN High mobility group protein B2 OS=Homo sapiens GN=HMGB2 PE=1 SV=2	2	3	12	1.309
	Q8TCB7	METL6_HUMAN Methyltransferase_like protein 6 OS=Homo sapiens GN=METTL6 PE=2 SV=2	2	2	5	1.306
	Q9H269	VPS16_HUMAN Vacuolar protein sorting_associated protein 16 homolog OS=Homo sapiens GN=VPS16 PE=1 SV=2	2	2	9	1.302
	O94762	RECQ5_HUMAN ATP_dependent DNA helicase Q5 OS=Homo sapiens GN=RECQL5 PE=1 SV=2	2	2	6	1.288
	P43246	MSH2_HUMAN DNA mismatch repair protein Msh2 OS=Homo sapiens GN=MSH2 PE=1 SV=1	2	2	5	1.286
	Q5JQF8	PAP1M_HUMAN Polyadenylate_binding protein 1_like 2 OS=Homo sapiens GN=PABPC1L2A PE=1 SV=1	2	2	3	1.282
	P35268	RL22_HUMAN 60S ribosomal protein L22 OS=Homo sapiens GN=RPL22 PE=1 SV=2	2	2	37	1.281
	O60284	ST18_HUMAN Suppression of tumorigenicity 18 protein OS=Homo sapiens GN=ST18 PE=1 SV=1	2	2	2	1.278
	Q99715	COCA1_HUMAN Collagen alpha_1(XII) chain OS=Homo sapiens GN=COL12A1 PE=1 SV=2	2	2	15	1.275
	Q9NYL9	TMOD3_HUMAN Tropomodulin_3 OS=Homo sapiens GN=TMOD3 PE=1 SV=1	2	2	3	1.269
	O75592	MYCB2_HUMAN Probable E3 ubiquitin_protein ligase MYCBP2 OS=Homo sapiens GN=MYCBP2 PE=1 SV=3	2	2	4	1.265
	O94956	SO2B1_HUMAN Solute carrier organic anion transporter family member 2B1 OS=Homo sapiens GN=SLCO2B1 PE=1 SV=2	2	2	2	1.262
	Q9BX26	SYCP2_HUMAN Synaptonemal complex protein 2 OS=Homo sapiens GN=SYCP2 PE=2 SV=2	2	2	5	1.251
	P08621	RU17_HUMAN U1 small nuclear ribonucleoprotein 70 kDa OS=Homo sapiens GN=SNRNP70 PE=1 SV=2	2	2	19	1.235
	Q9GZT3	SLIRP_HUMAN SRA stem_loop_interacting RNA_binding protein_ mitochondrial OS=Homo sapiens GN=SLIRP PE=1 SV=1	2	2	3	1.234
	Q8IZD9	DOCK3_HUMAN Dedicator of cytokinesis protein 3 OS=Homo sapiens GN=DOCK3 PE=1 SV=1	2	2	2	1.232
	P62263	RS14_HUMAN 40S ribosomal protein S14 OS=Homo sapiens GN=RPS14 PE=1 SV=3	2	4	48	1.228
	Q14008	CKAP5_HUMAN Cytoskeleton_associated protein 5 OS=Homo sapiens GN=CKAP5 PE=1 SV=3	2	2	2	1.226
	Q99832	TCPH_HUMAN T_complex protein 1 subunit eta OS=Homo sapiens GN=CCT7 PE=1 SV=2	2	4	62	1.223
	P27986	P85A_HUMAN Phosphatidylinositol 3_kinase regulatory subunit alpha OS=Homo sapiens GN=PIK3R1 PE=1 SV=2	2	2	2	1.22
	P0CG38	POTEI_HUMAN POTE ankyrin domain family member I OS=Homo sapiens GN=POTEI PE=3 SV=1	2	4	77	1.219
	P0CG39	POTEJ_HUMAN POTE ankyrin domain family member J OS=Homo sapiens GN=POTEJ PE=3 SV=1	2	4	77	1.219
	Q5JXB2	UE2NL_HUMAN Putative ubiquitin_conjugating enzyme E2 N_like OS=Homo sapiens GN=UBE2NL PE=5 SV=1	2	2	17	1.215
	Q99471	PFD5_HUMAN Prefoldin subunit 5 OS=Homo sapiens GN=PFDN5 PE=1 SV=2	2	2	31	1.212
	P56537	IF6_HUMAN Eukaryotic translation initiation factor 6 OS=Homo sapiens GN=EIF6 PE=1 SV=1	2	3	71	1.206
	P78527	PRKDC_HUMAN DNA_dependent protein kinase catalytic subunit OS=Homo sapiens GN=PRKDC PE=1 SV=3	2	2	5	1.203
	Q6EEV6	SUMO4_HUMAN Small ubiquitin_related modifier 4 OS=Homo sapiens GN=SUMO4 PE=1 SV=2	2	2	37	1.201
	Q7Z7B0	FLIP1_HUMAN Filamin_A_interacting protein 1 OS=Homo sapiens GN=FILIP1 PE=1 SV=1	2	2	6	1.2
	P21817	RYR1_HUMAN Ryanodine receptor 1 OS=Homo sapiens GN=RYR1 PE=1 SV=3	2	2	7	1.198
	Q8IYD1	ERF3B_HUMAN Eukaryotic peptide chain release factor GTP_binding subunit ERF3B OS=Homo sapiens GN=GSPT2 PE=1 SV=2	2	2	20	1.196
	Q92945	FUBP2_HUMAN Far upstream element_binding protein 2 OS=Homo sapiens GN=KHSRP PE=1 SV=4	2	2	16	1.196
	Q9UBQ5	EIF3K_HUMAN Eukaryotic translation initiation factor 3 subunit K OS=Homo sapiens GN=EIF3K PE=1 SV=1	2	3	21	1.189
	P51665	PSD7_HUMAN 26S proteasome non_ATPase regulatory subunit 7 OS=Homo sapiens GN=PSMD7 PE=1 SV=2	2	2	11	1.186
	P05198	IF2A_HUMAN Eukaryotic translation initiation factor 2 subunit 1 OS=Homo sapiens GN=EIF2S1 PE=1 SV=3	2	2	27	1.185
	Q14103	HNRPD_HUMAN Heterogeneous nuclear ribonucleoprotein D0 OS=Homo sapiens GN=HNRNPD PE=1 SV=1	2	5	45	1.184
	P22090	RS4Y1_HUMAN 40S ribosomal protein S4_ Y isoform 1 OS=Homo sapiens GN=RPS4Y1 PE=2 SV=2	2	2	7	1.182
	Q8TD47	RS4Y2_HUMAN 40S ribosomal protein S4_ Y isoform 2 OS=Homo sapiens GN=RPS4Y2 PE=1 SV=3	2	2	7	1.182
	P19320	VCAM1_HUMAN Vascular cell adhesion protein 1 OS=Homo sapiens GN=VCAM1 PE=1 SV=1	2	3	5	1.18
	P63220	RS21_HUMAN 40S ribosomal protein S21 OS=Homo sapiens GN=RPS21 PE=1 SV=1	2	5	54	1.177
	P62750	RL23A_HUMAN 60S ribosomal protein L23a OS=Homo sapiens GN=RPL23A PE=1 SV=1	2	3	28	1.175
	P84098	RL19_HUMAN 60S ribosomal protein L19 OS=Homo sapiens GN=RPL19 PE=1 SV=1	2	4	48	1.169
	Q9BXT6	M10L1_HUMAN Putative helicase Mov10l1 OS=Homo sapiens GN=MOV10L1 PE=1 SV=1	2	2	2	1.169
	P53667	LIMK1_HUMAN LIM domain kinase 1 OS=Homo sapiens GN=LIMK1 PE=1 SV=3	2	3	4	1.167
	P23284	PPIB_HUMAN Peptidyl_prolyl cis_trans isomerase B OS=Homo sapiens GN=PPIB PE=1 SV=2	2	3	9	1.164
	P20929	NEBU_HUMAN Nebulin OS=Homo sapiens GN=NEB PE=1 SV=4	2	3	8	1.162
	Q08378	GOGA3_HUMAN Golgin subfamily A member 3 OS=Homo sapiens GN=GOLGA3 PE=1 SV=2	2	2	6	1.156
	O60684	IMA7_HUMAN Importin subunit alpha_7 OS=Homo sapiens GN=KPNA6 PE=1 SV=1	2	2	7	1.151
	P52294	IMA1_HUMAN Importin subunit alpha_1 OS=Homo sapiens GN=KPNA1 PE=1 SV=3	2	2	7	1.151
	Q9Y266	NUDC_HUMAN Nuclear migration protein nudC OS=Homo sapiens GN=NUDC PE=1 SV=1	2	2	24	1.149
	Q14203	DCTN1_HUMAN Dynactin subunit 1 OS=Homo sapiens GN=DCTN1 PE=1 SV=3	2	2	2	1.147
	P42766	RL35_HUMAN 60S ribosomal protein L35 OS=Homo sapiens GN=RPL35 PE=1 SV=2	2	3	37	1.144
	Q9H6A9	PCX3_HUMAN Pecanex_like protein 3 OS=Homo sapiens GN=PCNXL3 PE=1 SV=2	2	3	6	1.141
	Q7L622	G2E3_HUMAN G2/M phase_specific E3 ubiquitin_protein ligase OS=Homo sapiens GN=G2E3 PE=1 SV=1	2	2	4	1.138
	Q12931	TRAP1_HUMAN Heat shock protein 75 kDa_ mitochondrial OS=Homo sapiens GN=TRAP1 PE=1 SV=3	2	4	77	1.134
	Q9Y4D8	K0614_HUMAN Probable E3 ubiquitin_protein ligase C12orf51 OS=Homo sapiens GN=C12orf51 PE=1 SV=5	2	2	6	1.131
	Q7RTX8	HIN1L_HUMAN Putative HIN1_like protein OS=Homo sapiens GN=HIN1L PE=5 SV=1	2	2	16	1.127
	P50570	DYN2_HUMAN Dynamin_2 OS=Homo sapiens GN=DNM2 PE=1 SV=2	2	2	14	1.125
	Q05193	DYN1_HUMAN Dynamin_1 OS=Homo sapiens GN=DNM1 PE=1 SV=2	2	2	14	1.125
	Q9UQ16	DYN3_HUMAN Dynamin_3 OS=Homo sapiens GN=DNM3 PE=1 SV=4	2	2	14	1.125
	P01133	EGF_HUMAN Pro_epidermal growth factor OS=Homo sapiens GN=EGF PE=1 SV=2	2	2	5	1.122
	P10412	H14_HUMAN Histone H1.4 OS=Homo sapiens GN=HIST1H1E PE=1 SV=2	2	2	26	1.12
	P16402	H13_HUMAN Histone H1.3 OS=Homo sapiens GN=HIST1H1D PE=1 SV=2	2	2	26	1.12
	P16403	H12_HUMAN Histone H1.2 OS=Homo sapiens GN=HIST1H1C PE=1 SV=2	2	2	26	1.12
	O75970	MPDZ_HUMAN Multiple PDZ domain protein OS=Homo sapiens GN=MPDZ PE=1 SV=2	2	2	3	1.12
	Q9Y618	NCOR2_HUMAN Nuclear receptor corepressor 2 OS=Homo sapiens GN=NCOR2 PE=1 SV=2	2	2	2	1.12
	P46063	RECQ1_HUMAN ATP_dependent DNA helicase Q1 OS=Homo sapiens GN=RECQL PE=1 SV=3	2	2	2	1.115
	O75153	K0664_HUMAN Protein KIAA0664 OS=Homo sapiens GN=KIAA0664 PE=1 SV=2	2	2	3	1.111
	Q9NQC3	RTN4_HUMAN Reticulon_4 OS=Homo sapiens GN=RTN4 PE=1 SV=2	2	2	23	1.103
	A8K8P3	SFI1_HUMAN Protein SFI1 homolog OS=Homo sapiens GN=SFI1 PE=1 SV=2	2	2	3	1.1
	P55265	DSRAD_HUMAN Double_stranded RNA_specific adenosine deaminase OS=Homo sapiens GN=ADAR PE=1 SV=4	2	2	2	1.094
	O00487	PSDE_HUMAN 26S proteasome non_ATPase regulatory subunit 14 OS=Homo sapiens GN=PSMD14 PE=1 SV=1	2	3	28	1.093
	Q96CW6	S7A6O_HUMAN Probable RNA polymerase II nuclear localization protein SLC7A6OS OS=Homo sapiens GN=SLC7A6OS PE=1 SV=2	2	2	6	1.09
	Q8NFA0	UBP32_HUMAN Ubiquitin carboxyl_terminal hydrolase 32 OS=Homo sapiens GN=USP32 PE=1 SV=1	2	1	2	1.09
	Q9Y4G6	TLN2_HUMAN Talin_2 OS=Homo sapiens GN=TLN2 PE=1 SV=4	2	3	4	1.084
	P62277	RS13_HUMAN 40S ribosomal protein S13 OS=Homo sapiens GN=RPS13 PE=1 SV=2	2	4	41	1.081
	O60336	MABP1_HUMAN Mitogen_activated protein kinase_binding protein 1 OS=Homo sapiens GN=MAPKBP1 PE=2 SV=4	2	2	3	1.08
	Q9UKX2	MYH2_HUMAN Myosin_2 OS=Homo sapiens GN=MYH2 PE=1 SV=1	2	2	9	1.078
	P84085	ARF5_HUMAN ADP_ribosylation factor 5 OS=Homo sapiens GN=ARF5 PE=1 SV=2	2	3	25	1.072
	P51148	RAB5C_HUMAN Ras_related protein Rab_5C OS=Homo sapiens GN=RAB5C PE=1 SV=2	2	2	2	1.069
	P25054	APC_HUMAN Adenomatous polyposis coli protein OS=Homo sapiens GN=APC PE=1 SV=2	2	2	4	1.066
	Q16281	CNGA3_HUMAN Cyclic nucleotide_gated cation channel alpha_3 OS=Homo sapiens GN=CNGA3 PE=1 SV=2	2	2	18	1.064
	Q9Y570	PPME1_HUMAN Protein phosphatase methylesterase 1 OS=Homo sapiens GN=PPME1 PE=1 SV=3	2	2	7	1.064
	Q9UPN3	MACF1_HUMAN Microtubule_actin cross_linking factor 1_ isoforms 1/2/3/5 OS=Homo sapiens GN=MACF1 PE=1 SV=4	2	2	4	1.064
	Q92503	S14L1_HUMAN SEC14_like protein 1 OS=Homo sapiens GN=SEC14L1 PE=1 SV=2	2	2	2	1.064
	O75083	WDR1_HUMAN WD repeat_containing protein 1 OS=Homo sapiens GN=WDR1 PE=1 SV=4	2	2	20	1.061
	P11055	MYH3_HUMAN Myosin_3 OS=Homo sapiens GN=MYH3 PE=1 SV=3	2	2	6	1.06
	P63173	RL38_HUMAN 60S ribosomal protein L38 OS=Homo sapiens GN=RPL38 PE=1 SV=2	2	3	32	1.059
	Q9P258	RCC2_HUMAN Protein RCC2 OS=Homo sapiens GN=RCC2 PE=1 SV=2	2	3	12	1.059
	Q9C093	SPEF2_HUMAN Sperm flagellar protein 2 OS=Homo sapiens GN=SPEF2 PE=1 SV=2	2	3	5	1.059
	Q9NTJ3	SMC4_HUMAN Structural maintenance of chromosomes protein 4 OS=Homo sapiens GN=SMC4 PE=1 SV=2	2	2	2	1.057
	Q01813	K6PP_HUMAN 6_phosphofructokinase type C OS=Homo sapiens GN=PFKP PE=1 SV=2	2	2	31	1.056
	P12036	NFH_HUMAN Neurofilament heavy polypeptide OS=Homo sapiens GN=NEFH PE=1 SV=4	2	3	46	1.055
	O75363	BCAS1_HUMAN Breast carcinoma_amplified sequence 1 OS=Homo sapiens GN=BCAS1 PE=1 SV=2	2	2	4	1.05
	Q9Y4D2	DGLA_HUMAN Sn1_specific diacylglycerol lipase alpha OS=Homo sapiens GN=DAGLA PE=1 SV=3	2	2	6	1.048
	Q5SW79	CE170_HUMAN Centrosomal protein of 170 kDa OS=Homo sapiens GN=CEP170 PE=1 SV=1	2	2	5	1.048
	P60228	EIF3E_HUMAN Eukaryotic translation initiation factor 3 subunit E OS=Homo sapiens GN=EIF3E PE=1 SV=1	2	2	3	1.047
	P27816	MAP4_HUMAN Microtubule_associated protein 4 OS=Homo sapiens GN=MAP4 PE=1 SV=3	2	2	7	1.044
	Q5CZC0	FSIP2_HUMAN Fibrous sheath_interacting protein 2 OS=Homo sapiens GN=FSIP2 PE=1 SV=4	2	2	2	1.042
	Q92614	MY18A_HUMAN Unconventional myosin_XVIIIa OS=Homo sapiens GN=MYO18A PE=1 SV=3	2	2	10	1.039
	Q9GZY0	NXF2_HUMAN Nuclear RNA export factor 2 OS=Homo sapiens GN=NXF2 PE=1 SV=1	2	3	3	1.039
	O00471	EXOC5_HUMAN Exocyst complex component 5 OS=Homo sapiens GN=EXOC5 PE=1 SV=1	2	1	4	1.032
	Q7KZF4	SND1_HUMAN Staphylococcal nuclease domain_containing protein 1 OS=Homo sapiens GN=SND1 PE=1 SV=1	2	2	2	1.029
	Q12955	ANK3_HUMAN Ankyrin_3 OS=Homo sapiens GN=ANK3 PE=1 SV=3	2	2	2	1.027
	Q9UNM6	PSD13_HUMAN 26S proteasome non_ATPase regulatory subunit 13 OS=Homo sapiens GN=PSMD13 PE=1 SV=2	2	2	55	1.026
	Q13630	FCL_HUMAN GDP_L_fucose synthase OS=Homo sapiens GN=TSTA3 PE=1 SV=1	2	2	15	1.026
	A8MWY0	K132L_HUMAN UPF0577 protein KIAA1324_like OS=Homo sapiens GN=KIAA1324L PE=2 SV=2	2	2	4	1.023
	P13797	PLST_HUMAN Plastin_3 OS=Homo sapiens GN=PLS3 PE=1 SV=4	2	2	2	1.023
	Q00975	CAC1B_HUMAN Voltage_dependent N_type calcium channel subunit alpha_1B OS=Homo sapiens GN=CACNA1B PE=1 SV=1	2	3	18	1.021
	Q15181	IPYR_HUMAN Inorganic pyrophosphatase OS=Homo sapiens GN=PPA1 PE=1 SV=2	2	3	11	1.021
	Q02880	TOP2B_HUMAN DNA topoisomerase 2_beta OS=Homo sapiens GN=TOP2B PE=1 SV=3	2	2	3	1.021
	Q8N6L0	CC155_HUMAN Coiled_coil domain_containing protein 155 OS=Homo sapiens GN=CCDC155 PE=2 SV=2	2	2	3	1.021
	P51857	AK1D1_HUMAN 3_oxo_5_beta_steroid 4_dehydrogenase OS=Homo sapiens GN=AKR1D1 PE=1 SV=1	2	2	3	1.017
	P62753	RS6_HUMAN 40S ribosomal protein S6 OS=Homo sapiens GN=RPS6 PE=1 SV=1	2	3	23	1.013
	P17661	DESM_HUMAN Desmin OS=Homo sapiens GN=DES PE=1 SV=3	2	6	138	1.011
	P15924	DESP_HUMAN Desmoplakin OS=Homo sapiens GN=DSP PE=1 SV=3	2	2	7	1.011
	P10809	CH60_HUMAN 60 kDa heat shock protein_ mitochondrial OS=Homo sapiens GN=HSPD1 PE=1 SV=2	2	3	20	1.01
	P17980	PRS6A_HUMAN 26S protease regulatory subunit 6A OS=Homo sapiens GN=PSMC3 PE=1 SV=3	2	3	31	1.005
	Q9NQW6	ANLN_HUMAN Actin_binding protein anillin OS=Homo sapiens GN=ANLN PE=1 SV=2	2	2	2	1.002
	O43933	PEX1_HUMAN Peroxisome biogenesis factor 1 OS=Homo sapiens GN=PEX1 PE=1 SV=1	2	2	4	0.997
	Q6ZT12	UBR3_HUMAN E3 ubiquitin_protein ligase UBR3 OS=Homo sapiens GN=UBR3 PE=2 SV=2	2	2	3	0.996
	O75821	EIF3G_HUMAN Eukaryotic translation initiation factor 3 subunit G OS=Homo sapiens GN=EIF3G PE=1 SV=2	2	2	11	0.994
	Q9NYU1	UGGG2_HUMAN UDP_glucose:glycoprotein glucosyltransferase 2 OS=Homo sapiens GN=UGGT2 PE=1 SV=4	2	2	4	0.992
	P07196	NFL_HUMAN Neurofilament light polypeptide OS=Homo sapiens GN=NEFL PE=1 SV=3	2	3	46	0.991
	P30613	KPYR_HUMAN Pyruvate kinase isozymes R/L OS=Homo sapiens GN=PKLR PE=1 SV=2	2	2	7	0.99
	Q8N841	TTLL6_HUMAN Tubulin polyglutamylase TTLL6 OS=Homo sapiens GN=TTLL6 PE=1 SV=2	2	3	7	0.986
	Q9BV20	MTNA_HUMAN Methylthioribose_1_phosphate isomerase OS=Homo sapiens GN=MRI1 PE=1 SV=1	2	2	27	0.984
	Q96FZ2	CC037_HUMAN UPF0361 protein C3orf37 OS=Homo sapiens GN=C3orf37 PE=1 SV=1	2	2	5	0.981
	Q9Y4C1	KDM3A_HUMAN Lysine_specific demethylase 3A OS=Homo sapiens GN=KDM3A PE=1 SV=4	2	2	4	0.981
	Q8IVF2	AHNK2_HUMAN Protein AHNAK2 OS=Homo sapiens GN=AHNAK2 PE=1 SV=2	2	2	5	0.976
	P26447	S10A4_HUMAN Protein S100_A4 OS=Homo sapiens GN=S100A4 PE=1 SV=1	2	2	26	0.975
	P14324	FPPS_HUMAN Farnesyl pyrophosphate synthase OS=Homo sapiens GN=FDPS PE=1 SV=4	2	4	22	0.967
	P61353	RL27_HUMAN 60S ribosomal protein L27 OS=Homo sapiens GN=RPL27 PE=1 SV=2	2	2	19	0.967
	P16949	STMN1_HUMAN Stathmin OS=Homo sapiens GN=STMN1 PE=1 SV=3	2	2	38	0.965
	Q7Z736	PKHH3_HUMAN Pleckstrin homology domain_containing family H member 3 OS=Homo sapiens GN=PLEKHH3 PE=1 SV=2	2	2	7	0.96
	Q9P225	DYH2_HUMAN Dynein heavy chain 2_ axonemal OS=Homo sapiens GN=DNAH2 PE=1 SV=3	2	3	5	0.96
	Q9H3K6	BOLA2_HUMAN BolA_like protein 2 OS=Homo sapiens GN=BOLA2 PE=1 SV=1	2	4	9	0.956
	O75533	SF3B1_HUMAN Splicing factor 3B subunit 1 OS=Homo sapiens GN=SF3B1 PE=1 SV=3	2	3	8	0.953
	Q13439	GOGA4_HUMAN Golgin subfamily A member 4 OS=Homo sapiens GN=GOLGA4 PE=1 SV=1	2	2	5	0.949
	Q14683	SMC1A_HUMAN Structural maintenance of chromosomes protein 1A OS=Homo sapiens GN=SMC1A PE=1 SV=2	2	3	5	0.948
	A6NDG6	PGP_HUMAN Phosphoglycolate phosphatase OS=Homo sapiens GN=PGP PE=1 SV=1	2	2	2	0.94
	P82094	TMF1_HUMAN TATA element modulatory factor OS=Homo sapiens GN=TMF1 PE=1 SV=2	2	2	25	0.935
	P46778	RL21_HUMAN 60S ribosomal protein L21 OS=Homo sapiens GN=RPL21 PE=1 SV=2	2	4	41	0.934
	Q15366	PCBP2_HUMAN Poly(rC)_binding protein 2 OS=Homo sapiens GN=PCBP2 PE=1 SV=1	2	2	57	0.932
	P06493	CDK1_HUMAN Cyclin_dependent kinase 1 OS=Homo sapiens GN=CDK1 PE=1 SV=3	2	3	32	0.927
	Q92915	FGF14_HUMAN Fibroblast growth factor 14 OS=Homo sapiens GN=FGF14 PE=1 SV=1	2	3	7	0.925
	Q9BUV0	CA063_HUMAN UPF0471 protein C1orf63 OS=Homo sapiens GN=C1orf63 PE=2 SV=2	2	2	2	0.923
	P24941	CDK2_HUMAN Cyclin_dependent kinase 2 OS=Homo sapiens GN=CDK2 PE=1 SV=2	2	2	12	0.922
	Q14055	CO9A2_HUMAN Collagen alpha_2(IX) chain OS=Homo sapiens GN=COL9A2 PE=1 SV=2	2	2	2	0.918
	P55884	EIF3B_HUMAN Eukaryotic translation initiation factor 3 subunit B OS=Homo sapiens GN=EIF3B PE=1 SV=3	2	3	20	0.913
	Q15369	ELOC_HUMAN Transcription elongation factor B polypeptide 1 OS=Homo sapiens GN=TCEB1 PE=1 SV=1	2	3	24	0.912
	Q14444	CAPR1_HUMAN Caprin_1 OS=Homo sapiens GN=CAPRIN1 PE=1 SV=2	2	2	40	0.911
	P50579	AMPM2_HUMAN Methionine aminopeptidase 2 OS=Homo sapiens GN=METAP2 PE=1 SV=1	2	3	8	0.911
	Q9HB71	CYBP_HUMAN Calcyclin_binding protein OS=Homo sapiens GN=CACYBP PE=1 SV=2	2	3	38	0.909
	Q16555	DPYL2_HUMAN Dihydropyrimidinase_related protein 2 OS=Homo sapiens GN=DPYSL2 PE=1 SV=1	2	3	34	0.909
	P62857	RS28_HUMAN 40S ribosomal protein S28 OS=Homo sapiens GN=RPS28 PE=1 SV=1	2	2	44	0.908
	P18124	RL7_HUMAN 60S ribosomal protein L7 OS=Homo sapiens GN=RPL7 PE=1 SV=1	2	2	21	0.908
	Q8WWV6	FCAMR_HUMAN High affinity immunoglobulin alpha and immunoglobulin mu Fc receptor OS=Homo sapiens GN=FCAMR PE=1 SV=1	2	2	2	0.905
	P20810	ICAL_HUMAN Calpastatin OS=Homo sapiens GN=CAST PE=1 SV=4	2	3	25	0.899
	Q8IYY4	DZI1L_HUMAN Zinc finger protein DZIP1L OS=Homo sapiens GN=DZIP1L PE=2 SV=2	2	2	2	0.893
	Q14019	COTL1_HUMAN Coactosin_like protein OS=Homo sapiens GN=COTL1 PE=1 SV=3	2	4	25	0.886
	A6NCL7	AN33B_HUMAN Ankyrin repeat domain_containing protein 33B OS=Homo sapiens GN=ANKRD33B PE=4 SV=1	2	2	2	0.883
	O15144	ARPC2_HUMAN Actin_related protein 2/3 complex subunit 2 OS=Homo sapiens GN=ARPC2 PE=1 SV=1	2	2	27	0.88
	Q8WXU2	DYXC1_HUMAN Dyslexia susceptibility 1 candidate gene 1 protein OS=Homo sapiens GN=DYX1C1 PE=1 SV=2	2	2	2	0.874
	Q8WWK9	CKAP2_HUMAN Cytoskeleton_associated protein 2 OS=Homo sapiens GN=CKAP2 PE=1 SV=1	2	2	12	0.871
	Q15046	SYK_HUMAN Lysine__tRNA ligase OS=Homo sapiens GN=KARS PE=1 SV=3	2	3	12	0.867
	Q8TC59	PIWL2_HUMAN Piwi_like protein 2 OS=Homo sapiens GN=PIWIL2 PE=1 SV=1	2	2	2	0.867
	P62913	RL11_HUMAN 60S ribosomal protein L11 OS=Homo sapiens GN=RPL11 PE=1 SV=2	2	2	35	0.866
	P07741	APT_HUMAN Adenine phosphoribosyltransferase OS=Homo sapiens GN=APRT PE=1 SV=2	2	2	12	0.863
	Q5JSZ5	PRC2B_HUMAN Protein PRRC2B OS=Homo sapiens GN=PRRC2B PE=1 SV=2	2	2	2	0.861
	Q14315	FLNC_HUMAN Filamin_C OS=Homo sapiens GN=FLNC PE=1 SV=3	2	2	46	0.858
	P46781	RS9_HUMAN 40S ribosomal protein S9 OS=Homo sapiens GN=RPS9 PE=1 SV=3	2	2	20	0.856
	Q9UHV9	PFD2_HUMAN Prefoldin subunit 2 OS=Homo sapiens GN=PFDN2 PE=1 SV=1	2	3	48	0.855
	Q08752	PPID_HUMAN Peptidyl_prolyl cis_trans isomerase D OS=Homo sapiens GN=PPID PE=1 SV=3	2	2	3	0.854
	Q8IZ41	RASEF_HUMAN Ras and EF_hand domain_containing protein OS=Homo sapiens GN=RASEF PE=1 SV=1	2	2	2	0.853
	Q14232	EI2BA_HUMAN Translation initiation factor eIF_2B subunit alpha OS=Homo sapiens GN=EIF2B1 PE=1 SV=1	2	6	8	0.851
	P61088	UBE2N_HUMAN Ubiquitin_conjugating enzyme E2 N OS=Homo sapiens GN=UBE2N PE=1 SV=1	2	4	30	0.847
	P15559	NQO1_HUMAN NAD(P)H dehydrogenase [quinone] 1 OS=Homo sapiens GN=NQO1 PE=1 SV=1	2	3	9	0.847
	Q05BV3	EMAL5_HUMAN Echinoderm microtubule_associated protein_like 5 OS=Homo sapiens GN=EML5 PE=2 SV=3	2	2	2	0.846
	P62314	SMD1_HUMAN Small nuclear ribonucleoprotein Sm D1 OS=Homo sapiens GN=SNRPD1 PE=1 SV=1	2	2	23	0.845
	P49588	SYAC_HUMAN Alanine__tRNA ligase_ cytoplasmic OS=Homo sapiens GN=AARS PE=1 SV=2	2	3	18	0.844
	P20290	BTF3_HUMAN Transcription factor BTF3 OS=Homo sapiens GN=BTF3 PE=1 SV=1	2	3	35	0.843
	Q8N5C6	SRBD1_HUMAN S1 RNA_binding domain_containing protein 1 OS=Homo sapiens GN=SRBD1 PE=1 SV=2	2	2	14	0.839
	Q96Q42	ALS2_HUMAN Alsin OS=Homo sapiens GN=ALS2 PE=1 SV=2	2	2	5	0.834
	Q9BRA2	TXD17_HUMAN Thioredoxin domain_containing protein 17 OS=Homo sapiens GN=TXNDC17 PE=1 SV=1	2	2	22	0.828
	P09960	LKHA4_HUMAN Leukotriene A_4 hydrolase OS=Homo sapiens GN=LTA4H PE=1 SV=2	2	2	9	0.827
	Q9UHD2	TBK1_HUMAN Serine/threonine_protein kinase TBK1 OS=Homo sapiens GN=TBK1 PE=1 SV=1	2	2	2	0.826
	Q14684	RRP1B_HUMAN Ribosomal RNA processing protein 1 homolog B OS=Homo sapiens GN=RRP1B PE=1 SV=3	2	2	5	0.819
	Q9NTI2	AT8A2_HUMAN Probable phospholipid_transporting ATPase IB OS=Homo sapiens GN=ATP8A2 PE=2 SV=2	2	1	2	0.819
	Q9UHD1	CHRD1_HUMAN Cysteine and histidine_rich domain_containing protein 1 OS=Homo sapiens GN=CHORDC1 PE=1 SV=2	2	5	47	0.817
	O75822	EIF3J_HUMAN Eukaryotic translation initiation factor 3 subunit J OS=Homo sapiens GN=EIF3J PE=1 SV=2	2	2	23	0.81
	Q99613	EIF3C_HUMAN Eukaryotic translation initiation factor 3 subunit C OS=Homo sapiens GN=EIF3C PE=1 SV=1	2	3	24	0.808
	P35080	PROF2_HUMAN Profilin_2 OS=Homo sapiens GN=PFN2 PE=1 SV=3	2	3	26	0.802
	Q9Y2K3	MYH15_HUMAN Myosin_15 OS=Homo sapiens GN=MYH15 PE=1 SV=5	2	2	2	0.795
	Q96B97	SH3K1_HUMAN SH3 domain_containing kinase_binding protein 1 OS=Homo sapiens GN=SH3KBP1 PE=1 SV=2	2	2	7	0.787
	Q9BX97	PLVAP_HUMAN Plasmalemma vesicle_associated protein OS=Homo sapiens GN=PLVAP PE=2 SV=1	2	2	19	0.78
	O15372	EIF3H_HUMAN Eukaryotic translation initiation factor 3 subunit H OS=Homo sapiens GN=EIF3H PE=1 SV=1	2	3	14	0.777
	Q8TF64	GIPC3_HUMAN PDZ domain_containing protein GIPC3 OS=Homo sapiens GN=GIPC3 PE=1 SV=1	2	2	6	0.777
	Q15052	ARHG6_HUMAN Rho guanine nucleotide exchange factor 6 OS=Homo sapiens GN=ARHGEF6 PE=1 SV=2	2	2	6	0.77
	Q02790	FKBP4_HUMAN Peptidyl_prolyl cis_trans isomerase FKBP4 OS=Homo sapiens GN=FKBP4 PE=1 SV=3	2	2	26	0.769
	P08107	HSP71_HUMAN Heat shock 70 kDa protein 1A/1B OS=Homo sapiens GN=HSPA1A PE=1 SV=5	2	2	31	0.753
	P34931	HS71L_HUMAN Heat shock 70 kDa protein 1_like OS=Homo sapiens GN=HSPA1L PE=1 SV=2	2	2	31	0.753
	Q6VMQ6	MCAF1_HUMAN Activating transcription factor 7_interacting protein 1 OS=Homo sapiens GN=ATF7IP PE=1 SV=3	2	2	2	0.75
	Q07960	RHG01_HUMAN Rho GTPase_activating protein 1 OS=Homo sapiens GN=ARHGAP1 PE=1 SV=1	2	2	3	0.734
	Q6KC79	NIPBL_HUMAN Nipped_B_like protein OS=Homo sapiens GN=NIPBL PE=1 SV=2	2	3	8	0.725
	P08133	ANXA6_HUMAN Annexin A6 OS=Homo sapiens GN=ANXA6 PE=1 SV=3	2	2	24	0.724
	O15371	EIF3D_HUMAN Eukaryotic translation initiation factor 3 subunit D OS=Homo sapiens GN=EIF3D PE=1 SV=1	2	2	20	0.724
	Q9BZK3	NACP1_HUMAN Putative nascent polypeptide_associated complex subunit alpha_like protein OS=Homo sapiens GN=NACAP1 PE=5 SV=1	2	2	13	0.721
	Q96L73	NSD1_HUMAN Histone_lysine N_methyltransferase_ H3 lysine_36 and H4 lysine_20 specific OS=Homo sapiens GN=NSD1 PE=1 SV=1	2	3	9	0.721
	Q99798	ACON_HUMAN Aconitate hydratase_ mitochondrial OS=Homo sapiens GN=ACO2 PE=1 SV=2	2	2	3	0.716
	P52565	GDIR1_HUMAN Rho GDP_dissociation inhibitor 1 OS=Homo sapiens GN=ARHGDIA PE=1 SV=3	2	3	50	0.712
	Q92833	JARD2_HUMAN Protein Jumonji OS=Homo sapiens GN=JARID2 PE=1 SV=2	2	2	13	0.698
	O75534	CSDE1_HUMAN Cold shock domain_containing protein E1 OS=Homo sapiens GN=CSDE1 PE=1 SV=2	2	2	14	0.693
	Q5VVQ6	OTU1_HUMAN Ubiquitin thioesterase OTU1 OS=Homo sapiens GN=YOD1 PE=1 SV=1	2	4	31	0.69
	P43363	MAGAA_HUMAN Melanoma_associated antigen 10 OS=Homo sapiens GN=MAGEA10 PE=2 SV=2	2	3	31	0.688
	Q9ULL5	PRR12_HUMAN Proline_rich protein 12 OS=Homo sapiens GN=PRR12 PE=1 SV=2	2	2	3	0.683
	P15259	PGAM2_HUMAN Phosphoglycerate mutase 2 OS=Homo sapiens GN=PGAM2 PE=1 SV=3	2	4	47	0.674
	Q8N0Y7	PGAM4_HUMAN Probable phosphoglycerate mutase 4 OS=Homo sapiens GN=PGAM4 PE=1 SV=1	2	4	47	0.674
	Q01469	FABP5_HUMAN Fatty acid_binding protein_ epidermal OS=Homo sapiens GN=FABP5 PE=1 SV=3	2	2	24	0.672
	P28066	PSA5_HUMAN Proteasome subunit alpha type_5 OS=Homo sapiens GN=PSMA5 PE=1 SV=3	2	3	19	0.67
	Q13404	UB2V1_HUMAN Ubiquitin_conjugating enzyme E2 variant 1 OS=Homo sapiens GN=UBE2V1 PE=1 SV=2	2	3	37	0.668
	P26639	SYTC_HUMAN Threonine__tRNA ligase_ cytoplasmic OS=Homo sapiens GN=TARS PE=1 SV=3	2	2	4	0.668
	O60361	NDK8_HUMAN Putative nucleoside diphosphate kinase OS=Homo sapiens GN=NME2P1 PE=5 SV=1	2	6	57	0.664
	P10599	THIO_HUMAN Thioredoxin OS=Homo sapiens GN=TXN PE=1 SV=3	2	2	23	0.634
	Q9NTI5	PDS5B_HUMAN Sister chromatid cohesion protein PDS5 homolog B OS=Homo sapiens GN=PDS5B PE=1 SV=1	2	2	7	0.627
	Q01130	SRSF2_HUMAN Serine/arginine_rich splicing factor 2 OS=Homo sapiens GN=SRSF2 PE=1 SV=4	2	2	13	0.615
	Q9Y4J8	DTNA_HUMAN Dystrobrevin alpha OS=Homo sapiens GN=DTNA PE=1 SV=2	2	4	12	0.612
	P49736	MCM2_HUMAN DNA replication licensing factor MCM2 OS=Homo sapiens GN=MCM2 PE=1 SV=4	2	2	6	0.603
	Q9NX31	CT111_HUMAN Uncharacterized protein C20orf111 OS=Homo sapiens GN=C20orf111 PE=2 SV=2	2	1	2	0.538
	O75170	PP6R2_HUMAN Serine/threonine_protein phosphatase 6 regulatory subunit 2 OS=Homo sapiens GN=PPP6R2 PE=1 SV=2	2	3	21	0.482
	P38646	GRP75_HUMAN Stress_70 protein_ mitochondrial OS=Homo sapiens GN=HSPA9 PE=1 SV=2	2	2	7	0.439
	P23526	SAHH_HUMAN Adenosylhomocysteinase OS=Homo sapiens GN=AHCY PE=1 SV=4	2	3	15	0.398
	P15531	NDKA_HUMAN Nucleoside diphosphate kinase A OS=Homo sapiens GN=NME1 PE=1 SV=1	2	7	73	0.279
	P25788	PSA3_HUMAN Proteasome subunit alpha type_3 OS=Homo sapiens GN=PSMA3 PE=1 SV=2	2	2	17	0.129
	P40925	MDHC_HUMAN Malate dehydrogenase_ cytoplasmic OS=Homo sapiens GN=MDH1 PE=1 SV=4	2	2	18	0.058
	Q01850	CDR2_HUMAN Cerebellar degeneration_related protein 2 OS=Homo sapiens GN=CDR2 PE=1 SV=2	1	1	6	3.254
	O00567	NOP56_HUMAN Nucleolar protein 56 OS=Homo sapiens GN=NOP56 PE=1 SV=4	1	1	2	3.179
	Q16690	DUS5_HUMAN Dual specificity protein phosphatase 5 OS=Homo sapiens GN=DUSP5 PE=1 SV=2	1	1	12	2.801
	Q8TE73	DYH5_HUMAN Dynein heavy chain 5_ axonemal OS=Homo sapiens GN=DNAH5 PE=1 SV=3	1	1	6	2.729
	O60563	CCNT1_HUMAN Cyclin_T1 OS=Homo sapiens GN=CCNT1 PE=1 SV=1	1	1	2	2.729
	O94903	PROSC_HUMAN Proline synthase co_transcribed bacterial homolog protein OS=Homo sapiens GN=PROSC PE=1 SV=1	1	1	2	2.729
	Q9ULT8	HECD1_HUMAN E3 ubiquitin_protein ligase HECTD1 OS=Homo sapiens GN=HECTD1 PE=1 SV=3	1	1	3	2.547
	O60814	H2B1K_HUMAN Histone H2B type 1_K OS=Homo sapiens GN=HIST1H2BK PE=1 SV=3	1	1	7	2.472
	P57053	H2BFS_HUMAN Histone H2B type F_S OS=Homo sapiens GN=H2BFS PE=1 SV=2	1	1	7	2.472
	P58876	H2B1D_HUMAN Histone H2B type 1_D OS=Homo sapiens GN=HIST1H2BD PE=1 SV=2	1	1	7	2.472
	P62807	H2B1C_HUMAN Histone H2B type 1_C/E/F/G/I OS=Homo sapiens GN=HIST1H2BC PE=1 SV=4	1	1	7	2.472
	Q5QNW6	H2B2F_HUMAN Histone H2B type 2_F OS=Homo sapiens GN=HIST2H2BF PE=1 SV=3	1	1	7	2.472
	Q93079	H2B1H_HUMAN Histone H2B type 1_H OS=Homo sapiens GN=HIST1H2BH PE=1 SV=3	1	1	7	2.472
	Q99877	H2B1N_HUMAN Histone H2B type 1_N OS=Homo sapiens GN=HIST1H2BN PE=1 SV=3	1	1	7	2.472
	Q99879	H2B1M_HUMAN Histone H2B type 1_M OS=Homo sapiens GN=HIST1H2BM PE=1 SV=3	1	1	7	2.472
	Q99880	H2B1L_HUMAN Histone H2B type 1_L OS=Homo sapiens GN=HIST1H2BL PE=1 SV=3	1	1	7	2.472
	Q10570	CPSF1_HUMAN Cleavage and polyadenylation specificity factor subunit 1 OS=Homo sapiens GN=CPSF1 PE=1 SV=2	1	2	14	2.45
	Q9NRW1	RAB6B_HUMAN Ras_related protein Rab_6B OS=Homo sapiens GN=RAB6B PE=1 SV=1	1	2	14	2.45
	Q15834	CC85B_HUMAN Coiled_coil domain_containing protein 85B OS=Homo sapiens GN=CCDC85B PE=1 SV=2	1	2	4	2.45
	Q9UJW7	ZN229_HUMAN Zinc finger protein 229 OS=Homo sapiens GN=ZNF229 PE=2 SV=3	1	1	2	2.433
	O75526	RMXL2_HUMAN RNA_binding motif protein_ X_linked_like_2 OS=Homo sapiens GN=RBMXL2 PE=1 SV=3	1	1	20	2.362
	Q8N7X1	RMXL3_HUMAN RNA_binding motif protein_ X_linked_like_3 OS=Homo sapiens GN=RBMXL3 PE=2 SV=2	1	1	20	2.362
	Q01844	EWS_HUMAN RNA_binding protein EWS OS=Homo sapiens GN=EWSR1 PE=1 SV=1	1	1	9	2.326
	Q14566	MCM6_HUMAN DNA replication licensing factor MCM6 OS=Homo sapiens GN=MCM6 PE=1 SV=1	1	1	4	2.315
	Q92544	TM9S4_HUMAN Transmembrane 9 superfamily member 4 OS=Homo sapiens GN=TM9SF4 PE=1 SV=2	1	1	2	2.311
	Q96R30	OR2V2_HUMAN Olfactory receptor 2V2 OS=Homo sapiens GN=OR2V2 PE=2 SV=3	1	1	6	2.31
	P06748	NPM_HUMAN Nucleophosmin OS=Homo sapiens GN=NPM1 PE=1 SV=2	1	3	78	2.277
	Q8IVM7	CM029_HUMAN Putative uncharacterized protein encoded by LINC00346 OS=Homo sapiens GN=LINC00346 PE=5 SV=1	1	1	5	2.266
	Q9Y2C2	UST_HUMAN Uronyl 2_sulfotransferase OS=Homo sapiens GN=UST PE=2 SV=1	1	1	3	2.2
	P25398	RS12_HUMAN 40S ribosomal protein S12 OS=Homo sapiens GN=RPS12 PE=1 SV=3	1	1	21	2.197
	Q96G21	IMP4_HUMAN U3 small nucleolar ribonucleoprotein protein IMP4 OS=Homo sapiens GN=IMP4 PE=1 SV=1	1	1	2	2.173
	O60346	PHLP1_HUMAN PH domain leucine_rich repeat_containing protein phosphatase 1 OS=Homo sapiens GN=PHLPP1 PE=1 SV=3	1	1	4	2.171
	Q9P013	CWC15_HUMAN Protein CWC15 homolog OS=Homo sapiens GN=CWC15 PE=1 SV=2	1	1	2	2.171
	P20962	PTMS_HUMAN Parathymosin OS=Homo sapiens GN=PTMS PE=1 SV=2	1	1	22	2.101
	Q9HAW4	CLSPN_HUMAN Claspin OS=Homo sapiens GN=CLSPN PE=1 SV=3	1	1	4	2.044
	O14594	NCAN_HUMAN Neurocan core protein OS=Homo sapiens GN=NCAN PE=2 SV=3	1	1	2	2.044
	O43309	ZSC12_HUMAN Zinc finger and SCAN domain_containing protein 12 OS=Homo sapiens GN=ZSCAN12 PE=2 SV=1	1	1	2	2.032
	P84103	SRSF3_HUMAN Serine/arginine_rich splicing factor 3 OS=Homo sapiens GN=SRSF3 PE=1 SV=1	1	2	7	1.955
	Q7LBC6	KDM3B_HUMAN Lysine_specific demethylase 3B OS=Homo sapiens GN=KDM3B PE=1 SV=2	1	2	9	1.904
	Q09028	RBBP4_HUMAN Histone_binding protein RBBP4 OS=Homo sapiens GN=RBBP4 PE=1 SV=3	1	1	6	1.903
	Q16576	RBBP7_HUMAN Histone_binding protein RBBP7 OS=Homo sapiens GN=RBBP7 PE=1 SV=1	1	1	6	1.903
	Q13111	CAF1A_HUMAN Chromatin assembly factor 1 subunit A OS=Homo sapiens GN=CHAF1A PE=1 SV=2	1	1	4	1.886
	P04908	H2A1B_HUMAN Histone H2A type 1_B/E OS=Homo sapiens GN=HIST1H2AB PE=1 SV=2	1	1	5	1.87
	P0C0S5	H2AZ_HUMAN Histone H2A.Z OS=Homo sapiens GN=H2AFZ PE=1 SV=2	1	1	5	1.87
	P16104	H2AX_HUMAN Histone H2A.x OS=Homo sapiens GN=H2AFX PE=1 SV=2	1	1	5	1.87
	Q71UI9	H2AV_HUMAN Histone H2A.V OS=Homo sapiens GN=H2AFV PE=1 SV=3	1	1	5	1.87
	Q7L7L0	H2A3_HUMAN Histone H2A type 3 OS=Homo sapiens GN=HIST3H2A PE=1 SV=3	1	1	5	1.87
	Q8IUE6	H2A2B_HUMAN Histone H2A type 2_B OS=Homo sapiens GN=HIST2H2AB PE=1 SV=3	1	1	5	1.87
	Q93077	H2A1C_HUMAN Histone H2A type 1_C OS=Homo sapiens GN=HIST1H2AC PE=1 SV=3	1	1	5	1.87
	Q96QV6	H2A1A_HUMAN Histone H2A type 1_A OS=Homo sapiens GN=HIST1H2AA PE=1 SV=3	1	1	5	1.87
	Q86X76	NIT1_HUMAN Nitrilase homolog 1 OS=Homo sapiens GN=NIT1 PE=1 SV=2	1	1	3	1.863
	Q7Z3J2	CP062_HUMAN UPF0505 protein C16orf62 OS=Homo sapiens GN=C16orf62 PE=1 SV=2	1	1	5	1.85
	Q9Y2W1	TR150_HUMAN Thyroid hormone receptor_associated protein 3 OS=Homo sapiens GN=THRAP3 PE=1 SV=2	1	1	7	1.842
	O94910	LPHN1_HUMAN Latrophilin_1 OS=Homo sapiens GN=LPHN1 PE=1 SV=1	1	1	8	1.818
	Q9H0E3	SP130_HUMAN Histone deacetylase complex subunit SAP130 OS=Homo sapiens GN=SAP130 PE=1 SV=1	1	2	2	1.783
	P31314	TLX1_HUMAN T_cell leukemia homeobox protein 1 OS=Homo sapiens GN=TLX1 PE=1 SV=1	1	1	3	1.769
	P46782	RS5_HUMAN 40S ribosomal protein S5 OS=Homo sapiens GN=RPS5 PE=1 SV=4	1	1	4	1.768
	Q8N6Y2	LRC17_HUMAN Leucine_rich repeat_containing protein 17 OS=Homo sapiens GN=LRRC17 PE=2 SV=1	1	1	2	1.757
	Q96SI9	STRBP_HUMAN Spermatid perinuclear RNA_binding protein OS=Homo sapiens GN=STRBP PE=1 SV=1	1	1	11	1.75
	A8MT19	RHN2L_HUMAN Putative rhophilin_2_like protein OS=Homo sapiens PE=5 SV=2	1	2	4	1.748
	B2RV13	CQ105_HUMAN Uncharacterized protein C17orf105 OS=Homo sapiens GN=C17orf105 PE=2 SV=1	1	1	2	1.716
	Q8NFD5	ARI1B_HUMAN AT_rich interactive domain_containing protein 1B OS=Homo sapiens GN=ARID1B PE=1 SV=2	1	1	6	1.692
	Q96C03	MID49_HUMAN Mitochondrial dynamic protein MID49 OS=Homo sapiens GN=SMCR7 PE=1 SV=1	1	1	2	1.692
	Q15024	EXOS7_HUMAN Exosome complex component RRP42 OS=Homo sapiens GN=EXOSC7 PE=1 SV=3	1	1	5	1.682
	Q9C0J9	BHE41_HUMAN Class E basic helix_loop_helix protein 41 OS=Homo sapiens GN=BHLHE41 PE=2 SV=1	1	1	2	1.678
	Q96AE4	FUBP1_HUMAN Far upstream element_binding protein 1 OS=Homo sapiens GN=FUBP1 PE=1 SV=3	1	2	18	1.676
	Q9Y613	FHOD1_HUMAN FH1/FH2 domain_containing protein 1 OS=Homo sapiens GN=FHOD1 PE=1 SV=3	1	1	4	1.668
	P55769	NH2L1_HUMAN NHP2_like protein 1 OS=Homo sapiens GN=NHP2L1 PE=1 SV=3	1	1	22	1.66
	P18850	ATF6A_HUMAN Cyclic AMP_dependent transcription factor ATF_6 alpha OS=Homo sapiens GN=ATF6 PE=1 SV=3	1	1	4	1.659
	P09493	TPM1_HUMAN Tropomyosin alpha_1 chain OS=Homo sapiens GN=TPM1 PE=1 SV=2	1	2	23	1.638
	Q8IWX7	UN45B_HUMAN Protein unc_45 homolog B OS=Homo sapiens GN=UNC45B PE=2 SV=1	1	2	2	1.638
	Q9Y3C6	PPIL1_HUMAN Peptidyl_prolyl cis_trans isomerase_like 1 OS=Homo sapiens GN=PPIL1 PE=1 SV=1	1	1	3	1.624
	P29536	LMOD1_HUMAN Leiomodin_1 OS=Homo sapiens GN=LMOD1 PE=1 SV=3	1	1	2	1.624
	P01130	LDLR_HUMAN Low_density lipoprotein receptor OS=Homo sapiens GN=LDLR PE=1 SV=1	1	1	2	1.623
	Q8WWQ8	STAB2_HUMAN Stabilin_2 OS=Homo sapiens GN=STAB2 PE=1 SV=3	1	1	7	1.618
	Q9H254	SPTN4_HUMAN Spectrin beta chain_ brain 3 OS=Homo sapiens GN=SPTBN4 PE=1 SV=2	1	1	3	1.618
	O43447	PPIH_HUMAN Peptidyl_prolyl cis_trans isomerase H OS=Homo sapiens GN=PPIH PE=1 SV=1	1	1	13	1.617
	Q14324	MYPC2_HUMAN Myosin_binding protein C_ fast_type OS=Homo sapiens GN=MYBPC2 PE=1 SV=2	1	1	6	1.617
	Q5VTT5	MYOM3_HUMAN Myomesin_3 OS=Homo sapiens GN=MYOM3 PE=2 SV=1	1	1	4	1.616
	Q9H4H8	FA83D_HUMAN Protein FAM83D OS=Homo sapiens GN=FAM83D PE=1 SV=3	1	1	14	1.615
	Q13342	LY10_HUMAN Nuclear body protein SP140 OS=Homo sapiens GN=SP140 PE=2 SV=2	1	1	6	1.607
	Q9H930	LY10L_HUMAN Nuclear body protein SP140_like protein OS=Homo sapiens GN=SP140L PE=2 SV=3	1	1	6	1.607
	Q8NAG6	ANKL1_HUMAN Ankyrin repeat and LEM domain_containing protein 1 OS=Homo sapiens GN=ANKLE1 PE=2 SV=2	1	1	2	1.596
	P62304	RUXE_HUMAN Small nuclear ribonucleoprotein E OS=Homo sapiens GN=SNRPE PE=1 SV=1	1	2	22	1.576
	P35580	MYH10_HUMAN Myosin_10 OS=Homo sapiens GN=MYH10 PE=1 SV=3	1	2	7	1.571
	P25786	PSA1_HUMAN Proteasome subunit alpha type_1 OS=Homo sapiens GN=PSMA1 PE=1 SV=1	1	1	6	1.57
	P26599	PTBP1_HUMAN Polypyrimidine tract_binding protein 1 OS=Homo sapiens GN=PTBP1 PE=1 SV=1	1	1	6	1.57
	Q99550	MPP9_HUMAN M_phase phosphoprotein 9 OS=Homo sapiens GN=MPHOSPH9 PE=1 SV=3	1	1	3	1.564
	A6NJ88	SGE1L_HUMAN Putative SAGE1_like protein OS=Homo sapiens PE=5 SV=4	1	1	2	1.559
	P41162	ETV3_HUMAN ETS translocation variant 3 OS=Homo sapiens GN=ETV3 PE=1 SV=2	1	1	5	1.556
	P50548	ERF_HUMAN ETS domain_containing transcription factor ERF OS=Homo sapiens GN=ERF PE=1 SV=2	1	1	5	1.556
	Q6ZN32	ETV3L_HUMAN ETS translocation variant 3_like protein OS=Homo sapiens GN=ETV3L PE=2 SV=1	1	1	5	1.556
	Q12912	LRMP_HUMAN Lymphoid_restricted membrane protein OS=Homo sapiens GN=LRMP PE=1 SV=3	1	2	2	1.55
	O94810	RGS11_HUMAN Regulator of G_protein signaling 11 OS=Homo sapiens GN=RGS11 PE=1 SV=2	1	1	3	1.548
	O75146	HIP1R_HUMAN Huntingtin_interacting protein 1_related protein OS=Homo sapiens GN=HIP1R PE=1 SV=2	1	1	2	1.548
	O43847	NRDC_HUMAN Nardilysin OS=Homo sapiens GN=NRD1 PE=1 SV=2	1	1	3	1.545
	Q8N130	NPT2C_HUMAN Sodium_dependent phosphate transport protein 2C OS=Homo sapiens GN=SLC34A3 PE=1 SV=2	1	1	7	1.544
	Q6ZTA4	TRI67_HUMAN Tripartite motif_containing protein 67 OS=Homo sapiens GN=TRIM67 PE=2 SV=3	1	1	2	1.543
	P09874	PARP1_HUMAN Poly [ADP_ribose] polymerase 1 OS=Homo sapiens GN=PARP1 PE=1 SV=4	1	1	7	1.536
	Q9P244	LRFN1_HUMAN Leucine_rich repeat and fibronectin type III domain_containing protein 1 OS=Homo sapiens GN=LRFN1 PE=1 SV=2	1	1	4	1.532
	O00161	SNP23_HUMAN Synaptosomal_associated protein 23 OS=Homo sapiens GN=SNAP23 PE=1 SV=1	1	1	4	1.516
	Q9NW82	WDR70_HUMAN WD repeat_containing protein 70 OS=Homo sapiens GN=WDR70 PE=1 SV=1	1	1	6	1.515
	Q9HAQ2	KIF9_HUMAN Kinesin_like protein KIF9 OS=Homo sapiens GN=KIF9 PE=1 SV=4	1	1	2	1.503
	Q9H0W8	SMG9_HUMAN Protein SMG9 OS=Homo sapiens GN=SMG9 PE=1 SV=1	1	1	4	1.502
	Q9Y3R5	DOP2_HUMAN Protein dopey_2 OS=Homo sapiens GN=DOPEY2 PE=1 SV=5	1	2	2	1.499
	Q12982	BNIP2_HUMAN BCL2/adenovirus E1B 19 kDa protein_interacting protein 2 OS=Homo sapiens GN=BNIP2 PE=1 SV=1	1	1	3	1.496
	P28482	MK01_HUMAN Mitogen_activated protein kinase 1 OS=Homo sapiens GN=MAPK1 PE=1 SV=3	1	1	5	1.495
	P51149	RAB7A_HUMAN Ras_related protein Rab_7a OS=Homo sapiens GN=RAB7A PE=1 SV=1	1	1	7	1.49
	Q9NS39	RED2_HUMAN Double_stranded RNA_specific editase B2 OS=Homo sapiens GN=ADARB2 PE=1 SV=1	1	1	6	1.49
	P40429	RL13A_HUMAN 60S ribosomal protein L13a OS=Homo sapiens GN=RPL13A PE=1 SV=2	1	1	20	1.479
	Q6NVV1	R13AX_HUMAN Putative 60S ribosomal protein L13a_like MGC87657 OS=Homo sapiens PE=5 SV=1	1	1	20	1.479
	A6NC57	ANR62_HUMAN Ankyrin repeat domain_containing protein 62 OS=Homo sapiens GN=ANKRD62 PE=2 SV=4	1	1	2	1.476
	P35637	FUS_HUMAN RNA_binding protein FUS OS=Homo sapiens GN=FUS PE=1 SV=1	1	2	25	1.475
	Q76FK4	NOL8_HUMAN Nucleolar protein 8 OS=Homo sapiens GN=NOL8 PE=1 SV=1	1	2	5	1.473
	Q96B18	DACT3_HUMAN Dapper homolog 3 OS=Homo sapiens GN=DACT3 PE=2 SV=2	1	1	2	1.464
	Q6Y7W6	PERQ2_HUMAN PERQ amino acid_rich with GYF domain_containing protein 2 OS=Homo sapiens GN=GIGYF2 PE=1 SV=1	1	1	6	1.458
	Q9UD71	PPR1B_HUMAN Protein phosphatase 1 regulatory subunit 1B OS=Homo sapiens GN=PPP1R1B PE=1 SV=2	1	1	4	1.458
	Q9Y2L5	TPPC8_HUMAN Trafficking protein particle complex subunit 8 OS=Homo sapiens GN=TRAPPC8 PE=1 SV=2	1	1	2	1.456
	Q16763	UBE2S_HUMAN Ubiquitin_conjugating enzyme E2 S OS=Homo sapiens GN=UBE2S PE=1 SV=2	1	1	12	1.452
	Q496J9	SV2C_HUMAN Synaptic vesicle glycoprotein 2C OS=Homo sapiens GN=SV2C PE=2 SV=1	1	1	2	1.45
	O14618	CCS_HUMAN Copper chaperone for superoxide dismutase OS=Homo sapiens GN=CCS PE=1 SV=1	1	1	2	1.447
	P51991	ROA3_HUMAN Heterogeneous nuclear ribonucleoprotein A3 OS=Homo sapiens GN=HNRNPA3 PE=1 SV=2	1	2	10	1.442
	P61758	PFD3_HUMAN Prefoldin subunit 3 OS=Homo sapiens GN=VBP1 PE=1 SV=3	1	1	3	1.442
	P33991	MCM4_HUMAN DNA replication licensing factor MCM4 OS=Homo sapiens GN=MCM4 PE=1 SV=5	1	1	9	1.437
	O43166	SI1L1_HUMAN Signal_induced proliferation_associated 1_like protein 1 OS=Homo sapiens GN=SIPA1L1 PE=1 SV=4	1	1	4	1.435
	Q7Z3T8	ZFY16_HUMAN Zinc finger FYVE domain_containing protein 16 OS=Homo sapiens GN=ZFYVE16 PE=1 SV=3	1	2	6	1.43
	P38117	ETFB_HUMAN Electron transfer flavoprotein subunit beta OS=Homo sapiens GN=ETFB PE=1 SV=3	1	1	5	1.426
	A8MW92	P20L1_HUMAN PHD finger protein 20_like protein 1 OS=Homo sapiens GN=PHF20L1 PE=1 SV=2	1	1	7	1.425
	A8MWD9	RUXGL_HUMAN Small nuclear ribonucleoprotein G_like protein OS=Homo sapiens PE=3 SV=2	1	1	23	1.424
	P62308	RUXG_HUMAN Small nuclear ribonucleoprotein G OS=Homo sapiens GN=SNRPG PE=1 SV=1	1	1	23	1.424
	P54687	BCAT1_HUMAN Branched_chain_amino_acid aminotransferase_ cytosolic OS=Homo sapiens GN=BCAT1 PE=1 SV=3	1	1	20	1.424
	Q9NZL4	HPBP1_HUMAN Hsp70_binding protein 1 OS=Homo sapiens GN=HSPBP1 PE=1 SV=1	1	1	6	1.423
	P06730	IF4E_HUMAN Eukaryotic translation initiation factor 4E OS=Homo sapiens GN=EIF4E PE=1 SV=2	1	1	8	1.42
	O43396	TXNL1_HUMAN Thioredoxin_like protein 1 OS=Homo sapiens GN=TXNL1 PE=1 SV=3	1	1	6	1.42
	Q8IYE0	CC146_HUMAN Coiled_coil domain_containing protein 146 OS=Homo sapiens GN=CCDC146 PE=2 SV=2	1	1	5	1.42
	Q7L775	EPMIP_HUMAN EPM2A_interacting protein 1 OS=Homo sapiens GN=EPM2AIP1 PE=1 SV=1	1	1	2	1.419
	Q08493	PDE4C_HUMAN cAMP_specific 3__5__cyclic phosphodiesterase 4C OS=Homo sapiens GN=PDE4C PE=1 SV=2	1	1	2	1.412
	P61086	UBE2K_HUMAN Ubiquitin_conjugating enzyme E2 K OS=Homo sapiens GN=UBE2K PE=1 SV=3	1	1	10	1.4
	Q9BSU3	NAA11_HUMAN N_alpha_acetyltransferase 11 OS=Homo sapiens GN=NAA11 PE=1 SV=3	1	2	4	1.395
	P09936	UCHL1_HUMAN Ubiquitin carboxyl_terminal hydrolase isozyme L1 OS=Homo sapiens GN=UCHL1 PE=1 SV=2	1	1	5	1.389
	P51172	SCNND_HUMAN Amiloride_sensitive sodium channel subunit delta OS=Homo sapiens GN=SCNN1D PE=1 SV=2	1	1	3	1.389
	A8MT70	ZBBX_HUMAN Zinc finger B_box domain_containing protein 1 OS=Homo sapiens GN=ZBBX PE=2 SV=3	1	1	4	1.388
	P23468	PTPRD_HUMAN Receptor_type tyrosine_protein phosphatase delta OS=Homo sapiens GN=PTPRD PE=1 SV=2	1	1	2	1.388
	Q13332	PTPRS_HUMAN Receptor_type tyrosine_protein phosphatase S OS=Homo sapiens GN=PTPRS PE=1 SV=3	1	1	2	1.388
	Q9UKD2	MRT4_HUMAN mRNA turnover protein 4 homolog OS=Homo sapiens GN=MRTO4 PE=1 SV=2	1	1	2	1.387
	P98171	RHG04_HUMAN Rho GTPase_activating protein 4 OS=Homo sapiens GN=ARHGAP4 PE=1 SV=2	1	1	3	1.386
	Q5HYI8	RABL3_HUMAN Rab_like protein 3 OS=Homo sapiens GN=RABL3 PE=1 SV=1	1	1	3	1.381
	Q86WV6	TM173_HUMAN Transmembrane protein 173 OS=Homo sapiens GN=TMEM173 PE=1 SV=1	1	1	2	1.378
	P43487	RANG_HUMAN Ran_specific GTPase_activating protein OS=Homo sapiens GN=RANBP1 PE=1 SV=1	1	1	23	1.376
	Q52LJ0	FA98B_HUMAN Protein FAM98B OS=Homo sapiens GN=FAM98B PE=1 SV=1	1	1	10	1.376
	Q8NCA5	FA98A_HUMAN Protein FAM98A OS=Homo sapiens GN=FAM98A PE=1 SV=1	1	1	10	1.376
	Q8N7B9	EFCB3_HUMAN EF_hand calcium_binding domain_containing protein 3 OS=Homo sapiens GN=EFCAB3 PE=1 SV=1	1	1	6	1.373
	O60292	SI1L3_HUMAN Signal_induced proliferation_associated 1_like protein 3 OS=Homo sapiens GN=SIPA1L3 PE=1 SV=3	1	1	5	1.373
	A2A2Z9	AN18B_HUMAN Ankyrin repeat domain_containing protein 18B OS=Homo sapiens GN=ANKRD18B PE=2 SV=1	1	1	2	1.373
	Q92538	GBF1_HUMAN Golgi_specific brefeldin A_resistance guanine nucleotide exchange factor 1 OS=Homo sapiens GN=GBF1 PE=1 SV=2	1	1	27	1.37
	Q15691	MARE1_HUMAN Microtubule_associated protein RP/EB family member 1 OS=Homo sapiens GN=MAPRE1 PE=1 SV=3	1	1	3	1.367
	P55145	MANF_HUMAN Mesencephalic astrocyte_derived neurotrophic factor OS=Homo sapiens GN=MANF PE=1 SV=3	1	1	2	1.352
	O00327	BMAL1_HUMAN Aryl hydrocarbon receptor nuclear translocator_like protein 1 OS=Homo sapiens GN=ARNTL PE=1 SV=2	1	2	20	1.35
	P61313	RL15_HUMAN 60S ribosomal protein L15 OS=Homo sapiens GN=RPL15 PE=1 SV=2	1	2	23	1.346
	P62244	RS15A_HUMAN 40S ribosomal protein S15a OS=Homo sapiens GN=RPS15A PE=1 SV=2	1	2	32	1.344
	O14602	IF1AY_HUMAN Eukaryotic translation initiation factor 1A_ Y_chromosomal OS=Homo sapiens GN=EIF1AY PE=1 SV=4	1	1	2	1.343
	P47813	IF1AX_HUMAN Eukaryotic translation initiation factor 1A_ X_chromosomal OS=Homo sapiens GN=EIF1AX PE=1 SV=2	1	1	2	1.343
	Q8N9V7	TOPZ1_HUMAN Testis_ and ovary_specific PAZ domain_containing protein 1 OS=Homo sapiens GN=TOPAZ1 PE=2 SV=3	1	2	2	1.341
	O00425	IF2B3_HUMAN Insulin_like growth factor 2 mRNA_binding protein 3 OS=Homo sapiens GN=IGF2BP3 PE=1 SV=2	1	1	3	1.336
	Q9NZI8	IF2B1_HUMAN Insulin_like growth factor 2 mRNA_binding protein 1 OS=Homo sapiens GN=IGF2BP1 PE=1 SV=2	1	1	3	1.336
	Q9Y6M1	IF2B2_HUMAN Insulin_like growth factor 2 mRNA_binding protein 2 OS=Homo sapiens GN=IGF2BP2 PE=1 SV=2	1	1	3	1.336
	O75828	CBR3_HUMAN Carbonyl reductase [NADPH] 3 OS=Homo sapiens GN=CBR3 PE=1 SV=3	1	2	17	1.331
	P16152	CBR1_HUMAN Carbonyl reductase [NADPH] 1 OS=Homo sapiens GN=CBR1 PE=1 SV=3	1	2	17	1.331
	P68431	H31_HUMAN Histone H3.1 OS=Homo sapiens GN=HIST1H3A PE=1 SV=2	1	2	2	1.331
	P84243	H33_HUMAN Histone H3.3 OS=Homo sapiens GN=H3F3A PE=1 SV=2	1	2	2	1.331
	Q16695	H31T_HUMAN Histone H3.1t OS=Homo sapiens GN=HIST3H3 PE=1 SV=3	1	2	2	1.331
	Q6NXT2	H3C_HUMAN Histone H3.3C OS=Homo sapiens GN=H3F3C PE=1 SV=3	1	2	2	1.331
	Q71DI3	H32_HUMAN Histone H3.2 OS=Homo sapiens GN=HIST2H3A PE=1 SV=3	1	2	2	1.331
	P17480	UBF1_HUMAN Nucleolar transcription factor 1 OS=Homo sapiens GN=UBTF PE=1 SV=1	1	1	5	1.328
	Q8TAL5	CI043_HUMAN Uncharacterized protein C9orf43 OS=Homo sapiens GN=C9orf43 PE=1 SV=1	1	1	3	1.324
	P61158	ARP3_HUMAN Actin_related protein 3 OS=Homo sapiens GN=ACTR3 PE=1 SV=3	1	1	2	1.322
	Q6PCB5	RSBNL_HUMAN Round spermatid basic protein 1_like protein OS=Homo sapiens GN=RSBN1L PE=1 SV=2	1	1	3	1.318
	O95948	ONEC2_HUMAN One cut domain family member 2 OS=Homo sapiens GN=ONECUT2 PE=2 SV=2	1	1	6	1.317
	Q66K74	MAP1S_HUMAN Microtubule_associated protein 1S OS=Homo sapiens GN=MAP1S PE=1 SV=2	1	1	4	1.317
	Q7Z6J8	UBE3D_HUMAN E3 ubiquitin_protein ligase E3D OS=Homo sapiens GN=UBE3D PE=1 SV=2	1	1	3	1.317
	A8MTB9	CEA18_HUMAN Carcinoembryonic antigen_related cell adhesion molecule 18 OS=Homo sapiens GN=CEACAM18 PE=2 SV=3	1	2	10	1.306
	P17655	CAN2_HUMAN Calpain_2 catalytic subunit OS=Homo sapiens GN=CAPN2 PE=1 SV=6	1	1	10	1.306
	Q9NR09	BIRC6_HUMAN Baculoviral IAP repeat_containing protein 6 OS=Homo sapiens GN=BIRC6 PE=1 SV=2	1	1	2	1.301
	Q8N5R6	CCD33_HUMAN Coiled_coil domain_containing protein 33 OS=Homo sapiens GN=CCDC33 PE=1 SV=3	1	1	2	1.301
	Q9UBQ0	VPS29_HUMAN Vacuolar protein sorting_associated protein 29 OS=Homo sapiens GN=VPS29 PE=1 SV=1	1	1	16	1.297
	Q8IXS6	PALM2_HUMAN Paralemmin_2 OS=Homo sapiens GN=PALM2 PE=1 SV=3	1	1	2	1.297
	Q15084	PDIA6_HUMAN Protein disulfide_isomerase A6 OS=Homo sapiens GN=PDIA6 PE=1 SV=1	1	1	6	1.288
	Q8N0W3	FUK_HUMAN L_fucose kinase OS=Homo sapiens GN=FUK PE=2 SV=2	1	1	18	1.285
	Q9NY97	B3GN2_HUMAN UDP_GlcNAc:betaGal beta_1_3_N_acetylglucosaminyltransferase 2 OS=Homo sapiens GN=B3GNT2 PE=1 SV=2	1	1	6	1.285
	P56705	WNT4_HUMAN Protein Wnt_4 OS=Homo sapiens GN=WNT4 PE=1 SV=4	1	2	5	1.283
	Q6N069	NAA16_HUMAN N_alpha_acetyltransferase 16_ NatA auxiliary subunit OS=Homo sapiens GN=NAA16 PE=1 SV=2	1	1	9	1.282
	P20338	RAB4A_HUMAN Ras_related protein Rab_4A OS=Homo sapiens GN=RAB4A PE=1 SV=2	1	1	13	1.281
	Q6PGP7	TTC37_HUMAN Tetratricopeptide repeat protein 37 OS=Homo sapiens GN=TTC37 PE=1 SV=1	1	1	3	1.272
	A6NL28	TPM3L_HUMAN Putative tropomyosin alpha_3 chain_like protein OS=Homo sapiens PE=5 SV=2	1	1	24	1.271
	Q9Y267	S22AE_HUMAN Solute carrier family 22 member 14 OS=Homo sapiens GN=SLC22A14 PE=2 SV=4	1	1	3	1.271
	Q9BUJ2	HNRL1_HUMAN Heterogeneous nuclear ribonucleoprotein U_like protein 1 OS=Homo sapiens GN=HNRNPUL1 PE=1 SV=2	1	2	10	1.268
	Q9Y224	CN166_HUMAN UPF0568 protein C14orf166 OS=Homo sapiens GN=C14orf166 PE=1 SV=1	1	1	6	1.267
	A6H8M9	CDHR4_HUMAN Cadherin_related family member 4 OS=Homo sapiens GN=CDHR4 PE=2 SV=1	1	1	2	1.263
	P14866	HNRPL_HUMAN Heterogeneous nuclear ribonucleoprotein L OS=Homo sapiens GN=HNRNPL PE=1 SV=2	1	2	21	1.257
	Q14168	MPP2_HUMAN MAGUK p55 subfamily member 2 OS=Homo sapiens GN=MPP2 PE=1 SV=3	1	1	25	1.254
	Q8IYW4	ENTD1_HUMAN ENTH domain_containing protein 1 OS=Homo sapiens GN=ENTHD1 PE=2 SV=1	1	1	20	1.254
	Q16787	LAMA3_HUMAN Laminin subunit alpha_3 OS=Homo sapiens GN=LAMA3 PE=1 SV=2	1	1	9	1.254
	Q9UKX3	MYH13_HUMAN Myosin_13 OS=Homo sapiens GN=MYH13 PE=1 SV=2	1	1	5	1.254
	Q6ZTY8	CL063_HUMAN Putative uncharacterized protein C12orf63 OS=Homo sapiens GN=C12orf63 PE=2 SV=2	1	1	2	1.25
	Q969H8	CS010_HUMAN UPF0556 protein C19orf10 OS=Homo sapiens GN=C19orf10 PE=1 SV=1	1	2	11	1.249
	P14649	MYL6B_HUMAN Myosin light chain 6B OS=Homo sapiens GN=MYL6B PE=1 SV=1	1	1	20	1.247
	Q9BTA0	F167B_HUMAN Protein FAM167B OS=Homo sapiens GN=FAM167B PE=2 SV=2	1	1	2	1.243
	Q68EM7	RHG17_HUMAN Rho GTPase_activating protein 17 OS=Homo sapiens GN=ARHGAP17 PE=1 SV=1	1	1	3	1.242
	Q8IVL1	NAV2_HUMAN Neuron navigator 2 OS=Homo sapiens GN=NAV2 PE=1 SV=3	1	1	6	1.241
	O60573	IF4E2_HUMAN Eukaryotic translation initiation factor 4E type 2 OS=Homo sapiens GN=EIF4E2 PE=1 SV=1	1	1	2	1.241
	Q9NTX7	RN146_HUMAN E3 ubiquitin_protein ligase RNF146 OS=Homo sapiens GN=RNF146 PE=1 SV=1	1	1	3	1.237
	Q9NRF9	DPOE3_HUMAN DNA polymerase epsilon subunit 3 OS=Homo sapiens GN=POLE3 PE=1 SV=1	1	1	8	1.236
	Q9Y5K5	UCHL5_HUMAN Ubiquitin carboxyl_terminal hydrolase isozyme L5 OS=Homo sapiens GN=UCHL5 PE=1 SV=3	1	1	7	1.23
	Q6ZMU1	C3P1_HUMAN Putative protein C3P1 OS=Homo sapiens GN=C3P1 PE=5 SV=3	1	1	2	1.229
	P61326	MGN_HUMAN Protein mago nashi homolog OS=Homo sapiens GN=MAGOH PE=1 SV=1	1	1	11	1.227
	Q96A72	MGN2_HUMAN Protein mago nashi homolog 2 OS=Homo sapiens GN=MAGOHB PE=1 SV=1	1	1	11	1.227
	Q96D46	NMD3_HUMAN 60S ribosomal export protein NMD3 OS=Homo sapiens GN=NMD3 PE=1 SV=1	1	1	2	1.227
	P07858	CATB_HUMAN Cathepsin B OS=Homo sapiens GN=CTSB PE=1 SV=3	1	1	3	1.225
	Q9P2D7	DYH1_HUMAN Dynein heavy chain 1_ axonemal OS=Homo sapiens GN=DNAH1 PE=1 SV=4	1	1	5	1.222
	P63313	TYB10_HUMAN Thymosin beta_10 OS=Homo sapiens GN=TMSB10 PE=1 SV=2	1	1	16	1.219
	P0C091	FREM3_HUMAN FRAS1_related extracellular matrix protein 3 OS=Homo sapiens GN=FREM3 PE=2 SV=2	1	2	2	1.219
	P36543	VATE1_HUMAN V_type proton ATPase subunit E 1 OS=Homo sapiens GN=ATP6V1E1 PE=1 SV=1	1	1	8	1.215
	Q7Z4Q2	HEAT3_HUMAN HEAT repeat_containing protein 3 OS=Homo sapiens GN=HEATR3 PE=1 SV=2	1	1	4	1.214
	Q6UW60	PCSK4_HUMAN Proprotein convertase subtilisin/kexin type 4 OS=Homo sapiens GN=PCSK4 PE=2 SV=2	1	1	2	1.211
	Q8TEX9	IPO4_HUMAN Importin_4 OS=Homo sapiens GN=IPO4 PE=1 SV=2	1	1	3	1.207
	Q9H093	NUAK2_HUMAN NUAK family SNF1_like kinase 2 OS=Homo sapiens GN=NUAK2 PE=1 SV=1	1	1	4	1.202
	O43149	ZZEF1_HUMAN Zinc finger ZZ_type and EF_hand domain_containing protein 1 OS=Homo sapiens GN=ZZEF1 PE=1 SV=6	1	1	2	1.202
	O75943	RAD17_HUMAN Cell cycle checkpoint protein RAD17 OS=Homo sapiens GN=RAD17 PE=1 SV=2	1	1	2	1.202
	O75376	NCOR1_HUMAN Nuclear receptor corepressor 1 OS=Homo sapiens GN=NCOR1 PE=1 SV=2	1	1	2	1.201
	Q9NQI0	DDX4_HUMAN Probable ATP_dependent RNA helicase DDX4 OS=Homo sapiens GN=DDX4 PE=2 SV=2	1	1	21	1.199
	P62829	RL23_HUMAN 60S ribosomal protein L23 OS=Homo sapiens GN=RPL23 PE=1 SV=1	1	4	45	1.193
	O94985	CSTN1_HUMAN Calsyntenin_1 OS=Homo sapiens GN=CLSTN1 PE=1 SV=1	1	1	4	1.193
	Q9Y237	PIN4_HUMAN Peptidyl_prolyl cis_trans isomerase NIMA_interacting 4 OS=Homo sapiens GN=PIN4 PE=1 SV=1	1	3	11	1.191
	O95359	TACC2_HUMAN Transforming acidic coiled_coil_containing protein 2 OS=Homo sapiens GN=TACC2 PE=1 SV=3	1	2	2	1.191
	Q2TB90	HKDC1_HUMAN Putative hexokinase HKDC1 OS=Homo sapiens GN=HKDC1 PE=2 SV=3	1	1	2	1.189
	Q2V2M9	FHOD3_HUMAN FH1/FH2 domain_containing protein 3 OS=Homo sapiens GN=FHOD3 PE=1 SV=2	1	1	15	1.188
	Q9H9L3	I20L2_HUMAN Interferon_stimulated 20 kDa exonuclease_like 2 OS=Homo sapiens GN=ISG20L2 PE=1 SV=1	1	1	4	1.185
	Q86XJ1	GA2L3_HUMAN GAS2_like protein 3 OS=Homo sapiens GN=GAS2L3 PE=1 SV=1	1	1	2	1.185
	P27635	RL10_HUMAN 60S ribosomal protein L10 OS=Homo sapiens GN=RPL10 PE=1 SV=4	1	3	35	1.184
	P78333	GPC5_HUMAN Glypican_5 OS=Homo sapiens GN=GPC5 PE=1 SV=1	1	1	3	1.182
	P18206	VINC_HUMAN Vinculin OS=Homo sapiens GN=VCL PE=1 SV=4	1	1	2	1.182
	P78332	RBM6_HUMAN RNA_binding protein 6 OS=Homo sapiens GN=RBM6 PE=1 SV=5	1	2	39	1.181
	Q9H246	CA021_HUMAN Uncharacterized protein C1orf21 OS=Homo sapiens GN=C1orf21 PE=1 SV=1	1	3	13	1.181
	P62805	H4_HUMAN Histone H4 OS=Homo sapiens GN=HIST1H4A PE=1 SV=2	1	1	10	1.181
	P62491	RB11A_HUMAN Ras_related protein Rab_11A OS=Homo sapiens GN=RAB11A PE=1 SV=3	1	2	12	1.18
	Q15907	RB11B_HUMAN Ras_related protein Rab_11B OS=Homo sapiens GN=RAB11B PE=1 SV=4	1	2	12	1.18
	Q8N122	RPTOR_HUMAN Regulatory_associated protein of mTOR OS=Homo sapiens GN=RPTOR PE=1 SV=1	1	2	16	1.178
	Q13469	NFAC2_HUMAN Nuclear factor of activated T_cells_ cytoplasmic 2 OS=Homo sapiens GN=NFATC2 PE=1 SV=2	1	1	27	1.177
	P78508	IRK10_HUMAN ATP_sensitive inward rectifier potassium channel 10 OS=Homo sapiens GN=KCNJ10 PE=1 SV=1	1	1	6	1.177
	P07992	ERCC1_HUMAN DNA excision repair protein ERCC_1 OS=Homo sapiens GN=ERCC1 PE=1 SV=1	1	1	2	1.177
	Q15742	NAB2_HUMAN NGFI_A_binding protein 2 OS=Homo sapiens GN=NAB2 PE=1 SV=1	1	1	2	1.176
	P0DJD4	RBY1C_HUMAN RNA_binding motif protein_ Y chromosome_ family 1 member C OS=Homo sapiens GN=RBMY1C PE=1 SV=1	1	1	31	1.175
	O60504	VINEX_HUMAN Vinexin OS=Homo sapiens GN=SORBS3 PE=1 SV=2	1	2	18	1.175
	P63279	UBC9_HUMAN SUMO_conjugating enzyme UBC9 OS=Homo sapiens GN=UBE2I PE=1 SV=1	1	1	10	1.175
	Q9Y4L1	HYOU1_HUMAN Hypoxia up_regulated protein 1 OS=Homo sapiens GN=HYOU1 PE=1 SV=1	1	1	5	1.175
	Q5THK1	PR14L_HUMAN Protein PRR14L OS=Homo sapiens GN=PRR14L PE=1 SV=1	1	2	5	1.172
	Q9Y2L1	RRP44_HUMAN Exosome complex exonuclease RRP44 OS=Homo sapiens GN=DIS3 PE=1 SV=2	1	1	5	1.168
	O75140	DEPD5_HUMAN DEP domain_containing protein 5 OS=Homo sapiens GN=DEPDC5 PE=2 SV=1	1	1	3	1.165
	Q9NS62	THSD1_HUMAN Thrombospondin type_1 domain_containing protein 1 OS=Homo sapiens GN=THSD1 PE=1 SV=1	1	1	2	1.165
	P62316	SMD2_HUMAN Small nuclear ribonucleoprotein Sm D2 OS=Homo sapiens GN=SNRPD2 PE=1 SV=1	1	2	12	1.164
	P31947	1433S_HUMAN 14_3_3 protein sigma OS=Homo sapiens GN=SFN PE=1 SV=1	1	1	13	1.161
	Q8N7M2	ZN283_HUMAN Zinc finger protein 283 OS=Homo sapiens GN=ZNF283 PE=2 SV=4	1	2	8	1.161
	Q14155	ARHG7_HUMAN Rho guanine nucleotide exchange factor 7 OS=Homo sapiens GN=ARHGEF7 PE=1 SV=2	1	1	4	1.159
	Q9H1P3	OSBL2_HUMAN Oxysterol_binding protein_related protein 2 OS=Homo sapiens GN=OSBPL2 PE=1 SV=1	1	1	2	1.154
	Q9UG22	GIMA2_HUMAN GTPase IMAP family member 2 OS=Homo sapiens GN=GIMAP2 PE=1 SV=2	1	1	2	1.152
	P32969	RL9_HUMAN 60S ribosomal protein L9 OS=Homo sapiens GN=RPL9 PE=1 SV=1	1	1	16	1.151
	P08651	NFIC_HUMAN Nuclear factor 1 C_type OS=Homo sapiens GN=NFIC PE=1 SV=2	1	1	4	1.15
	Q13443	ADAM9_HUMAN Disintegrin and metalloproteinase domain_containing protein 9 OS=Homo sapiens GN=ADAM9 PE=1 SV=1	1	1	3	1.15
	Q7Z4L5	TT21B_HUMAN Tetratricopeptide repeat protein 21B OS=Homo sapiens GN=TTC21B PE=1 SV=2	1	1	2	1.15
	P33993	MCM7_HUMAN DNA replication licensing factor MCM7 OS=Homo sapiens GN=MCM7 PE=1 SV=4	1	1	12	1.149
	Q04637	IF4G1_HUMAN Eukaryotic translation initiation factor 4 gamma 1 OS=Homo sapiens GN=EIF4G1 PE=1 SV=4	1	1	11	1.148
	Q9BYN7	ZN341_HUMAN Zinc finger protein 341 OS=Homo sapiens GN=ZNF341 PE=2 SV=2	1	1	6	1.148
	O00534	VMA5A_HUMAN von Willebrand factor A domain_containing protein 5A OS=Homo sapiens GN=VWA5A PE=2 SV=2	1	1	2	1.148
	Q5QJ74	TBCEL_HUMAN Tubulin_specific chaperone cofactor E_like protein OS=Homo sapiens GN=TBCEL PE=2 SV=2	1	1	2	1.148
	Q9H2B2	SYT4_HUMAN Synaptotagmin_4 OS=Homo sapiens GN=SYT4 PE=1 SV=1	1	1	2	1.148
	Q13394	MB211_HUMAN Protein mab_21_like 1 OS=Homo sapiens GN=MAB21L1 PE=2 SV=1	1	3	25	1.147
	Q9Y586	MB212_HUMAN Protein mab_21_like 2 OS=Homo sapiens GN=MAB21L2 PE=2 SV=1	1	3	25	1.147
	Q9NSB8	HOME2_HUMAN Homer protein homolog 2 OS=Homo sapiens GN=HOMER2 PE=1 SV=1	1	2	26	1.145
	Q86V81	THOC4_HUMAN THO complex subunit 4 OS=Homo sapiens GN=ALYREF PE=1 SV=3	1	2	25	1.144
	Q9H7R0	ZN442_HUMAN Zinc finger protein 442 OS=Homo sapiens GN=ZNF442 PE=2 SV=1	1	1	8	1.142
	Q9P2D0	IBTK_HUMAN Inhibitor of Bruton tyrosine kinase OS=Homo sapiens GN=IBTK PE=1 SV=3	1	1	8	1.141
	Q9C0F0	ASXL3_HUMAN Putative Polycomb group protein ASXL3 OS=Homo sapiens GN=ASXL3 PE=2 SV=3	1	1	3	1.141
	P35498	SCN1A_HUMAN Sodium channel protein type 1 subunit alpha OS=Homo sapiens GN=SCN1A PE=1 SV=2	1	1	9	1.14
	Q86SM8	MRGRE_HUMAN Mas_related G_protein coupled receptor member E OS=Homo sapiens GN=MRGPRE PE=2 SV=2	1	1	2	1.14
	Q9GZS1	RPA49_HUMAN DNA_directed RNA polymerase I subunit RPA49 OS=Homo sapiens GN=POLR1E PE=1 SV=2	1	1	2	1.14
	A7MD48	SRRM4_HUMAN Serine/arginine repetitive matrix protein 4 OS=Homo sapiens GN=SRRM4 PE=1 SV=2	1	1	2	1.139
	Q9NZW5	MPP6_HUMAN MAGUK p55 subfamily member 6 OS=Homo sapiens GN=MPP6 PE=1 SV=2	1	1	4	1.138
	A6XGL0	YJEN3_HUMAN YjeF N_terminal domain_containing protein 3 OS=Homo sapiens GN=YJEFN3 PE=1 SV=1	1	1	2	1.138
	Q8TD22	SFXN5_HUMAN Sideroflexin_5 OS=Homo sapiens GN=SFXN5 PE=2 SV=1	1	1	2	1.137
	P49590	SYHM_HUMAN Probable histidine__tRNA ligase_ mitochondrial OS=Homo sapiens GN=HARS2 PE=1 SV=1	1	1	7	1.136
	Q02410	APBA1_HUMAN Amyloid beta A4 precursor protein_binding family A member 1 OS=Homo sapiens GN=APBA1 PE=1 SV=3	1	2	2	1.134
	Q14123	PDE1C_HUMAN Calcium/calmodulin_dependent 3__5__cyclic nucleotide phosphodiesterase 1C OS=Homo sapiens GN=PDE1C PE=1 SV=1	1	1	3	1.133
	P10243	MYBA_HUMAN Myb_related protein A OS=Homo sapiens GN=MYBL1 PE=1 SV=2	1	1	3	1.133
	P61077	UB2D3_HUMAN Ubiquitin_conjugating enzyme E2 D3 OS=Homo sapiens GN=UBE2D3 PE=1 SV=1	1	1	3	1.133
	P62837	UB2D2_HUMAN Ubiquitin_conjugating enzyme E2 D2 OS=Homo sapiens GN=UBE2D2 PE=1 SV=1	1	1	3	1.133
	Q13489	BIRC3_HUMAN Baculoviral IAP repeat_containing protein 3 OS=Homo sapiens GN=BIRC3 PE=1 SV=2	1	1	2	1.133
	Q13490	BIRC2_HUMAN Baculoviral IAP repeat_containing protein 2 OS=Homo sapiens GN=BIRC2 PE=1 SV=2	1	1	2	1.133
	Q9BQG0	MBB1A_HUMAN Myb_binding protein 1A OS=Homo sapiens GN=MYBBP1A PE=1 SV=2	1	1	2	1.133
	O94911	ABCA8_HUMAN ATP_binding cassette sub_family A member 8 OS=Homo sapiens GN=ABCA8 PE=1 SV=3	1	1	7	1.131
	O15355	PPM1G_HUMAN Protein phosphatase 1G OS=Homo sapiens GN=PPM1G PE=1 SV=1	1	1	24	1.126
	Q5BKZ1	ZN326_HUMAN DBIRD complex subunit ZNF326 OS=Homo sapiens GN=ZNF326 PE=1 SV=2	1	1	6	1.126
	P57059	SIK1_HUMAN Serine/threonine_protein kinase SIK1 OS=Homo sapiens GN=SIK1 PE=1 SV=2	1	1	3	1.126
	P43362	MAGA9_HUMAN Melanoma_associated antigen 9 OS=Homo sapiens GN=MAGEA9 PE=2 SV=1	1	2	30	1.125
	Q9UPP1	PHF8_HUMAN Histone lysine demethylase PHF8 OS=Homo sapiens GN=PHF8 PE=1 SV=3	1	2	5	1.124
	P38606	VATA_HUMAN V_type proton ATPase catalytic subunit A OS=Homo sapiens GN=ATP6V1A PE=1 SV=2	1	1	2	1.124
	Q9UQ05	KCNH4_HUMAN Potassium voltage_gated channel subfamily H member 4 OS=Homo sapiens GN=KCNH4 PE=2 SV=1	1	3	19	1.118
	Q92556	ELMO1_HUMAN Engulfment and cell motility protein 1 OS=Homo sapiens GN=ELMO1 PE=1 SV=2	1	1	8	1.118
	Q13561	DCTN2_HUMAN Dynactin subunit 2 OS=Homo sapiens GN=DCTN2 PE=1 SV=4	1	1	4	1.118
	P23588	IF4B_HUMAN Eukaryotic translation initiation factor 4B OS=Homo sapiens GN=EIF4B PE=1 SV=2	1	1	5	1.114
	Q9UHJ3	SMBT1_HUMAN Scm_like with four MBT domains protein 1 OS=Homo sapiens GN=SFMBT1 PE=1 SV=2	1	1	10	1.113
	Q15843	NEDD8_HUMAN NEDD8 OS=Homo sapiens GN=NEDD8 PE=1 SV=1	1	1	11	1.111
	P55854	SUMO3_HUMAN Small ubiquitin_related modifier 3 OS=Homo sapiens GN=SUMO3 PE=1 SV=2	1	1	35	1.11
	P61956	SUMO2_HUMAN Small ubiquitin_related modifier 2 OS=Homo sapiens GN=SUMO2 PE=1 SV=3	1	1	35	1.11
	P62333	PRS10_HUMAN 26S protease regulatory subunit 10B OS=Homo sapiens GN=PSMC6 PE=1 SV=1	1	1	9	1.11
	O60231	DHX16_HUMAN Putative pre_mRNA_splicing factor ATP_dependent RNA helicase DHX16 OS=Homo sapiens GN=DHX16 PE=1 SV=2	1	1	3	1.11
	Q9UL59	ZN214_HUMAN Zinc finger protein 214 OS=Homo sapiens GN=ZNF214 PE=2 SV=2	1	1	2	1.11
	Q4KWH8	PLCH1_HUMAN 1_phosphatidylinositol 4_5_bisphosphate phosphodiesterase eta_1 OS=Homo sapiens GN=PLCH1 PE=1 SV=1	1	1	2	1.11
	Q96RU2	UBP28_HUMAN Ubiquitin carboxyl_terminal hydrolase 28 OS=Homo sapiens GN=USP28 PE=1 SV=1	1	1	2	1.11
	Q9BXU7	UBP26_HUMAN Ubiquitin carboxyl_terminal hydrolase 26 OS=Homo sapiens GN=USP26 PE=1 SV=1	1	1	2	1.11
	Q8NA03	FSIP1_HUMAN Fibrous sheath_interacting protein 1 OS=Homo sapiens GN=FSIP1 PE=2 SV=1	1	1	2	1.109
	P00492	HPRT_HUMAN Hypoxanthine_guanine phosphoribosyltransferase OS=Homo sapiens GN=HPRT1 PE=1 SV=2	1	1	2	1.108
	Q9BXI3	5NT1A_HUMAN Cytosolic 5__nucleotidase 1A OS=Homo sapiens GN=NT5C1A PE=2 SV=1	1	1	8	1.107
	A8MZA4	GG6L6_HUMAN Putative golgin subfamily A member 6_like protein 6 OS=Homo sapiens GN=GOLGA6L6 PE=5 SV=3	1	1	3	1.107
	Q8N7Z2	GG6L1_HUMAN Golgin subfamily A member 6_like protein 1 OS=Homo sapiens GN=GOLGA6L1 PE=2 SV=2	1	1	3	1.107
	Q8N6K4	YP021_HUMAN Putative uncharacterized protein MGC34800 OS=Homo sapiens PE=2 SV=1	1	1	3	1.107
	O15131	IMA5_HUMAN Importin subunit alpha_6 OS=Homo sapiens GN=KPNA5 PE=1 SV=2	1	1	4	1.106
	P09234	RU1C_HUMAN U1 small nuclear ribonucleoprotein C OS=Homo sapiens GN=SNRPC PE=1 SV=1	1	1	17	1.105
	Q8TAQ2	SMRC2_HUMAN SWI/SNF complex subunit SMARCC2 OS=Homo sapiens GN=SMARCC2 PE=1 SV=1	1	2	10	1.104
	Q6IMN6	CAPR2_HUMAN Caprin_2 OS=Homo sapiens GN=CAPRIN2 PE=1 SV=1	1	2	10	1.104
	Q93045	STMN2_HUMAN Stathmin_2 OS=Homo sapiens GN=STMN2 PE=1 SV=3	1	1	7	1.104
	Q3SXZ3	ZN718_HUMAN Zinc finger protein 718 OS=Homo sapiens GN=ZNF718 PE=2 SV=1	1	2	2	1.104
	Q5T1R4	ZEP3_HUMAN Transcription factor HIVEP3 OS=Homo sapiens GN=HIVEP3 PE=1 SV=1	1	1	3	1.103
	Q9NQT8	KI13B_HUMAN Kinesin_like protein KIF13B OS=Homo sapiens GN=KIF13B PE=1 SV=1	1	1	3	1.103
	Q92973	TNPO1_HUMAN Transportin_1 OS=Homo sapiens GN=TNPO1 PE=1 SV=2	1	1	10	1.102
	Q9UPQ7	PZRN3_HUMAN E3 ubiquitin_protein ligase PDZRN3 OS=Homo sapiens GN=PDZRN3 PE=1 SV=2	1	1	3	1.102
	Q9NP79	VTA1_HUMAN Vacuolar protein sorting_associated protein VTA1 homolog OS=Homo sapiens GN=VTA1 PE=1 SV=1	1	1	3	1.101
	Q9NP73	ALG13_HUMAN UDP_N_acetylglucosamine transferase subunit ALG13 homolog OS=Homo sapiens GN=ALG13 PE=1 SV=2	1	1	7	1.099
	Q9Y6G9	DC1L1_HUMAN Cytoplasmic dynein 1 light intermediate chain 1 OS=Homo sapiens GN=DYNC1LI1 PE=1 SV=3	1	1	10	1.097
	Q9UMX0	UBQL1_HUMAN Ubiquilin_1 OS=Homo sapiens GN=UBQLN1 PE=1 SV=2	1	1	3	1.095
	O60437	PEPL_HUMAN Periplakin OS=Homo sapiens GN=PPL PE=1 SV=4	1	1	8	1.094
	O76003	GLRX3_HUMAN Glutaredoxin_3 OS=Homo sapiens GN=GLRX3 PE=1 SV=2	1	1	11	1.093
	Q15056	IF4H_HUMAN Eukaryotic translation initiation factor 4H OS=Homo sapiens GN=EIF4H PE=1 SV=5	1	1	2	1.093
	Q00526	CDK3_HUMAN Cyclin_dependent kinase 3 OS=Homo sapiens GN=CDK3 PE=1 SV=1	1	1	11	1.09
	B1AL88	F155A_HUMAN Transmembrane protein FAM155A OS=Homo sapiens GN=FAM155A PE=2 SV=1	1	1	5	1.09
	Q9P241	AT10D_HUMAN Probable phospholipid_transporting ATPase VD OS=Homo sapiens GN=ATP10D PE=2 SV=3	1	1	3	1.09
	Q9NYF0	DACT1_HUMAN Dapper homolog 1 OS=Homo sapiens GN=DACT1 PE=2 SV=2	1	1	2	1.09
	Q3SXY8	AR13B_HUMAN ADP_ribosylation factor_like protein 13B OS=Homo sapiens GN=ARL13B PE=1 SV=1	1	1	16	1.089
	Q8WUG5	S22AH_HUMAN Solute carrier family 22 member 17 OS=Homo sapiens GN=SLC22A17 PE=2 SV=1	1	2	12	1.089
	Q96P44	COLA1_HUMAN Collagen alpha_1(XXI) chain OS=Homo sapiens GN=COL21A1 PE=2 SV=1	1	1	9	1.089
	Q9NP80	PLPL8_HUMAN Calcium_independent phospholipase A2_gamma OS=Homo sapiens GN=PNPLA8 PE=1 SV=1	1	1	6	1.089
	O75923	DYSF_HUMAN Dysferlin OS=Homo sapiens GN=DYSF PE=1 SV=1	1	1	5	1.089
	P20248	CCNA2_HUMAN Cyclin_A2 OS=Homo sapiens GN=CCNA2 PE=1 SV=2	1	1	2	1.089
	Q6ZQV5	ZN788_HUMAN Zinc finger protein 788 OS=Homo sapiens GN=ZNF788 PE=2 SV=2	1	1	2	1.089
	Q9H1Y3	OPN3_HUMAN Opsin_3 OS=Homo sapiens GN=OPN3 PE=1 SV=1	1	1	2	1.089
	P40926	MDHM_HUMAN Malate dehydrogenase_ mitochondrial OS=Homo sapiens GN=MDH2 PE=1 SV=3	1	1	12	1.088
	Q9P2R6	RERE_HUMAN Arginine_glutamic acid dipeptide repeats protein OS=Homo sapiens GN=RERE PE=1 SV=2	1	2	11	1.088
	Q8N907	DAND5_HUMAN DAN domain family member 5 OS=Homo sapiens GN=DAND5 PE=2 SV=1	1	2	8	1.088
	O43776	SYNC_HUMAN Asparagine__tRNA ligase_ cytoplasmic OS=Homo sapiens GN=NARS PE=1 SV=1	1	1	3	1.085
	P24666	PPAC_HUMAN Low molecular weight phosphotyrosine protein phosphatase OS=Homo sapiens GN=ACP1 PE=1 SV=3	1	1	2	1.085
	Q9UL25	RAB21_HUMAN Ras_related protein Rab_21 OS=Homo sapiens GN=RAB21 PE=1 SV=3	1	1	2	1.082
	Q8N142	PURA1_HUMAN Adenylosuccinate synthetase isozyme 1 OS=Homo sapiens GN=ADSSL1 PE=1 SV=1	1	1	5	1.081
	Q8NER1	TRPV1_HUMAN Transient receptor potential cation channel subfamily V member 1 OS=Homo sapiens GN=TRPV1 PE=1 SV=2	1	1	2	1.081
	P09496	CLCA_HUMAN Clathrin light chain A OS=Homo sapiens GN=CLTA PE=1 SV=1	1	1	5	1.08
	Q2KJ03	ZRAS1_HUMAN Putative uncharacterized protein ZNRD1_AS1 OS=Homo sapiens GN=ZNRD1_AS1 PE=5 SV=1	1	1	7	1.079
	Q9BZW7	TSG10_HUMAN Testis_specific gene 10 protein OS=Homo sapiens GN=TSGA10 PE=1 SV=1	1	1	2	1.078
	Q9Y281	COF2_HUMAN Cofilin_2 OS=Homo sapiens GN=CFL2 PE=1 SV=1	1	2	9	1.077
	Q5VSP4	LC1L1_HUMAN Putative lipocalin 1_like protein 1 OS=Homo sapiens GN=LCN1P1 PE=5 SV=1	1	1	2	1.077
	Q8NE71	ABCF1_HUMAN ATP_binding cassette sub_family F member 1 OS=Homo sapiens GN=ABCF1 PE=1 SV=2	1	1	5	1.075
	Q9NTJ4	MA2C1_HUMAN Alpha_mannosidase 2C1 OS=Homo sapiens GN=MAN2C1 PE=1 SV=1	1	1	4	1.075
	P16401	H15_HUMAN Histone H1.5 OS=Homo sapiens GN=HIST1H1B PE=1 SV=3	1	1	11	1.073
	P61204	ARF3_HUMAN ADP_ribosylation factor 3 OS=Homo sapiens GN=ARF3 PE=1 SV=2	1	3	24	1.072
	P84077	ARF1_HUMAN ADP_ribosylation factor 1 OS=Homo sapiens GN=ARF1 PE=1 SV=2	1	3	24	1.072
	P49454	CENPF_HUMAN Centromere protein F OS=Homo sapiens GN=CENPF PE=1 SV=2	1	1	2	1.072
	Q9UJV9	DDX41_HUMAN Probable ATP_dependent RNA helicase DDX41 OS=Homo sapiens GN=DDX41 PE=1 SV=2	1	1	15	1.064
	Q8NG66	NEK11_HUMAN Serine/threonine_protein kinase Nek11 OS=Homo sapiens GN=NEK11 PE=1 SV=2	1	2	9	1.064
	Q14722	KCAB1_HUMAN Voltage_gated potassium channel subunit beta_1 OS=Homo sapiens GN=KCNAB1 PE=2 SV=1	1	2	4	1.064
	Q96M63	CC114_HUMAN Coiled_coil domain_containing protein 114 OS=Homo sapiens GN=CCDC114 PE=2 SV=3	1	1	2	1.062
	Q8N0X4	CLYBL_HUMAN Citrate lyase subunit beta_like protein_ mitochondrial OS=Homo sapiens GN=CLYBL PE=2 SV=2	1	2	11	1.061
	Q8N1I0	DOCK4_HUMAN Dedicator of cytokinesis protein 4 OS=Homo sapiens GN=DOCK4 PE=1 SV=3	1	1	4	1.061
	P06737	PYGL_HUMAN Glycogen phosphorylase_ liver form OS=Homo sapiens GN=PYGL PE=1 SV=4	1	1	4	1.061
	Q6V0I7	FAT4_HUMAN Protocadherin Fat 4 OS=Homo sapiens GN=FAT4 PE=1 SV=2	1	1	3	1.061
	Q68DQ2	CRBG3_HUMAN Beta/gamma crystallin domain_containing protein 3 OS=Homo sapiens GN=CRYBG3 PE=2 SV=2	1	2	9	1.06
	Q9H9G7	AGO3_HUMAN Protein argonaute_3 OS=Homo sapiens GN=EIF2C3 PE=1 SV=2	1	1	2	1.06
	Q9HCK5	AGO4_HUMAN Protein argonaute_4 OS=Homo sapiens GN=EIF2C4 PE=1 SV=2	1	1	2	1.06
	Q9UL18	AGO1_HUMAN Protein argonaute_1 OS=Homo sapiens GN=EIF2C1 PE=1 SV=3	1	1	2	1.06
	O43423	AN32C_HUMAN Acidic leucine_rich nuclear phosphoprotein 32 family member C OS=Homo sapiens GN=ANP32C PE=2 SV=1	1	1	23	1.059
	P13674	P4HA1_HUMAN Prolyl 4_hydroxylase subunit alpha_1 OS=Homo sapiens GN=P4HA1 PE=1 SV=2	1	1	2	1.059
	Q96EZ4	MYEOV_HUMAN Myeloma_overexpressed gene protein OS=Homo sapiens GN=MYEOV PE=2 SV=2	1	1	3	1.058
	Q14498	RBM39_HUMAN RNA_binding protein 39 OS=Homo sapiens GN=RBM39 PE=1 SV=2	1	1	17	1.057
	P56470	LEG4_HUMAN Galectin_4 OS=Homo sapiens GN=LGALS4 PE=1 SV=1	1	1	14	1.057
	Q9BY15	EMR3_HUMAN EGF_like module_containing mucin_like hormone receptor_like 3 OS=Homo sapiens GN=EMR3 PE=1 SV=2	1	1	10	1.057
	Q9H582	ZN644_HUMAN Zinc finger protein 644 OS=Homo sapiens GN=ZNF644 PE=1 SV=2	1	1	7	1.057
	Q7Z3D4	LYSM3_HUMAN LysM and putative peptidoglycan_binding domain_containing protein 3 OS=Homo sapiens GN=LYSMD3 PE=2 SV=2	1	1	5	1.057
	Q9C0B2	K1751_HUMAN Uncharacterized protein KIAA1751 OS=Homo sapiens GN=KIAA1751 PE=2 SV=2	1	1	5	1.057
	Q9BRP4	PAAF1_HUMAN Proteasomal ATPase_associated factor 1 OS=Homo sapiens GN=PAAF1 PE=1 SV=2	1	1	4	1.057
	Q9Y4X0	AMMR1_HUMAN AMME syndrome candidate gene 1 protein OS=Homo sapiens GN=AMMECR1 PE=2 SV=1	1	1	3	1.057
	P49643	PRI2_HUMAN DNA primase large subunit OS=Homo sapiens GN=PRIM2 PE=1 SV=2	1	1	2	1.057
	Q9BQI6	ANR32_HUMAN Ankyrin repeat domain_containing protein 32 OS=Homo sapiens GN=ANKRD32 PE=1 SV=2	1	1	2	1.057
	P62847	RS24_HUMAN 40S ribosomal protein S24 OS=Homo sapiens GN=RPS24 PE=1 SV=1	1	2	36	1.055
	O60256	KPRB_HUMAN Phosphoribosyl pyrophosphate synthase_associated protein 2 OS=Homo sapiens GN=PRPSAP2 PE=1 SV=1	1	1	10	1.055
	Q14558	KPRA_HUMAN Phosphoribosyl pyrophosphate synthase_associated protein 1 OS=Homo sapiens GN=PRPSAP1 PE=1 SV=2	1	1	10	1.055
	Q86VI3	IQGA3_HUMAN Ras GTPase_activating_like protein IQGAP3 OS=Homo sapiens GN=IQGAP3 PE=1 SV=2	1	1	6	1.055
	P48595	SPB10_HUMAN Serpin B10 OS=Homo sapiens GN=SERPINB10 PE=1 SV=1	1	1	3	1.055
	P47211	GALR1_HUMAN Galanin receptor type 1 OS=Homo sapiens GN=GALR1 PE=2 SV=3	1	2	3	1.055
	Q99615	DNJC7_HUMAN DnaJ homolog subfamily C member 7 OS=Homo sapiens GN=DNAJC7 PE=1 SV=2	1	1	3	1.055
	Q9H0B6	KLC2_HUMAN Kinesin light chain 2 OS=Homo sapiens GN=KLC2 PE=1 SV=1	1	2	2	1.052
	P07197	NFM_HUMAN Neurofilament medium polypeptide OS=Homo sapiens GN=NEFM PE=1 SV=3	1	2	45	1.051
	Q16352	AINX_HUMAN Alpha_internexin OS=Homo sapiens GN=INA PE=1 SV=2	1	2	45	1.051
	Q8IX95	CTGE3_HUMAN Putative cutaneous T_cell lymphoma_associated antigen 3 OS=Homo sapiens GN=CTAGE3P PE=5 SV=1	1	1	6	1.051
	O15033	K0317_HUMAN Protein KIAA0317 OS=Homo sapiens GN=KIAA0317 PE=2 SV=3	1	1	3	1.05
	Q9GZV8	PRD14_HUMAN PR domain zinc finger protein 14 OS=Homo sapiens GN=PRDM14 PE=1 SV=1	1	1	2	1.049
	Q00534	CDK6_HUMAN Cyclin_dependent kinase 6 OS=Homo sapiens GN=CDK6 PE=1 SV=1	1	1	8	1.047
	Q9P2E3	ZNFX1_HUMAN NFX1_type zinc finger_containing protein 1 OS=Homo sapiens GN=ZNFX1 PE=1 SV=2	1	1	3	1.046
	Q6UB35	C1TM_HUMAN Monofunctional C1_tetrahydrofolate synthase_ mitochondrial OS=Homo sapiens GN=MTHFD1L PE=1 SV=1	1	1	2	1.046
	Q9Y4F5	K0284_HUMAN Protein KIAA0284 OS=Homo sapiens GN=KIAA0284 PE=1 SV=4	1	2	13	1.045
	P35240	MERL_HUMAN Merlin OS=Homo sapiens GN=NF2 PE=1 SV=1	1	1	8	1.044
	Q8IWA6	CCD60_HUMAN Coiled_coil domain_containing protein 60 OS=Homo sapiens GN=CCDC60 PE=2 SV=2	1	1	4	1.044
	O15047	SET1A_HUMAN Histone_lysine N_methyltransferase SETD1A OS=Homo sapiens GN=SETD1A PE=1 SV=3	1	2	6	1.043
	Q8N1F7	NUP93_HUMAN Nuclear pore complex protein Nup93 OS=Homo sapiens GN=NUP93 PE=1 SV=2	1	2	4	1.043
	P01266	THYG_HUMAN Thyroglobulin OS=Homo sapiens GN=TG PE=1 SV=5	1	2	11	1.041
	O94941	RNF37_HUMAN RING finger protein 37 OS=Homo sapiens GN=UBOX5 PE=2 SV=1	1	1	4	1.041
	Q13796	SHRM2_HUMAN Protein Shroom2 OS=Homo sapiens GN=SHROOM2 PE=1 SV=1	1	2	2	1.041
	P04275	VWF_HUMAN von Willebrand factor OS=Homo sapiens GN=VWF PE=1 SV=4	1	1	2	1.04
	P57721	PCBP3_HUMAN Poly(rC)_binding protein 3 OS=Homo sapiens GN=PCBP3 PE=1 SV=2	1	1	31	1.039
	Q9H777	RNZ1_HUMAN Zinc phosphodiesterase ELAC protein 1 OS=Homo sapiens GN=ELAC1 PE=1 SV=2	1	1	2	1.038
	Q6ZW05	PTHD4_HUMAN Patched domain_containing protein 4 OS=Homo sapiens GN=PTCHD4 PE=2 SV=3	1	2	2	1.036
	Q9BWJ5	SF3B5_HUMAN Splicing factor 3B subunit 5 OS=Homo sapiens GN=SF3B5 PE=1 SV=1	1	2	14	1.035
	O00533	CHL1_HUMAN Neural cell adhesion molecule L1_like protein OS=Homo sapiens GN=CHL1 PE=1 SV=4	1	1	2	1.035
	O95817	BAG3_HUMAN BAG family molecular chaperone regulator 3 OS=Homo sapiens GN=BAG3 PE=1 SV=3	1	1	13	1.033
	Q13268	DHRS2_HUMAN Dehydrogenase/reductase SDR family member 2 OS=Homo sapiens GN=DHRS2 PE=1 SV=3	1	1	6	1.032
	P26358	DNMT1_HUMAN DNA (cytosine_5)_methyltransferase 1 OS=Homo sapiens GN=DNMT1 PE=1 SV=2	1	1	5	1.031
	Q7L2H7	EIF3M_HUMAN Eukaryotic translation initiation factor 3 subunit M OS=Homo sapiens GN=EIF3M PE=1 SV=1	1	2	16	1.029
	O95199	RCBT2_HUMAN RCC1 and BTB domain_containing protein 2 OS=Homo sapiens GN=RCBTB2 PE=2 SV=1	1	2	4	1.029
	P14314	GLU2B_HUMAN Glucosidase 2 subunit beta OS=Homo sapiens GN=PRKCSH PE=1 SV=2	1	1	18	1.027
	Q685J3	MUC17_HUMAN Mucin_17 OS=Homo sapiens GN=MUC17 PE=1 SV=2	1	1	6	1.026
	Q4VCS5	AMOT_HUMAN Angiomotin OS=Homo sapiens GN=AMOT PE=1 SV=1	1	1	2	1.026
	P01595	KV103_HUMAN Ig kappa chain V_I region Bi OS=Homo sapiens PE=1 SV=1	1	1	2	1.025
	O14782	KIF3C_HUMAN Kinesin_like protein KIF3C OS=Homo sapiens GN=KIF3C PE=1 SV=3	1	1	10	1.024
	O14556	G3PT_HUMAN Glyceraldehyde_3_phosphate dehydrogenase_ testis_specific OS=Homo sapiens GN=GAPDHS PE=1 SV=2	1	1	7	1.023
	Q9HB07	MYG1_HUMAN UPF0160 protein MYG1_ mitochondrial OS=Homo sapiens GN=C12orf10 PE=1 SV=2	1	1	4	1.023
	Q2M218	ZN630_HUMAN Zinc finger protein 630 OS=Homo sapiens GN=ZNF630 PE=2 SV=1	1	1	2	1.023
	Q92526	TCPW_HUMAN T_complex protein 1 subunit zeta_2 OS=Homo sapiens GN=CCT6B PE=1 SV=5	1	2	34	1.022
	P11586	C1TC_HUMAN C_1_tetrahydrofolate synthase_ cytoplasmic OS=Homo sapiens GN=MTHFD1 PE=1 SV=3	1	1	9	1.022
	Q8N883	ZN614_HUMAN Zinc finger protein 614 OS=Homo sapiens GN=ZNF614 PE=2 SV=2	1	1	4	1.022
	Q9UKW4	VAV3_HUMAN Guanine nucleotide exchange factor VAV3 OS=Homo sapiens GN=VAV3 PE=1 SV=1	1	2	2	1.02
	Q9H223	EHD4_HUMAN EH domain_containing protein 4 OS=Homo sapiens GN=EHD4 PE=1 SV=1	1	1	14	1.018
	Q5U5X8	CL034_HUMAN Uncharacterized protein C12orf34 OS=Homo sapiens GN=C12orf34 PE=2 SV=1	1	1	7	1.018
	O43861	ATP9B_HUMAN Probable phospholipid_transporting ATPase IIB OS=Homo sapiens GN=ATP9B PE=2 SV=4	1	1	3	1.018
	Q9Y6D5	BIG2_HUMAN Brefeldin A_inhibited guanine nucleotide_exchange protein 2 OS=Homo sapiens GN=ARFGEF2 PE=1 SV=3	1	1	3	1.018
	P40763	STAT3_HUMAN Signal transducer and activator of transcription 3 OS=Homo sapiens GN=STAT3 PE=1 SV=2	1	1	2	1.018
	P49763	PLGF_HUMAN Placenta growth factor OS=Homo sapiens GN=PGF PE=1 SV=2	1	1	2	1.018
	Q9BY43	CHM4A_HUMAN Charged multivesicular body protein 4a OS=Homo sapiens GN=CHMP4A PE=1 SV=3	1	1	2	1.018
	P54727	RD23B_HUMAN UV excision repair protein RAD23 homolog B OS=Homo sapiens GN=RAD23B PE=1 SV=1	1	1	9	1.017
	P00751	CFAB_HUMAN Complement factor B OS=Homo sapiens GN=CFB PE=1 SV=2	1	1	4	1.016
	Q9Y223	GLCNE_HUMAN Bifunctional UDP_N_acetylglucosamine 2_epimerase/N_acetylmannosamine kinase OS=Homo sapiens GN=GNE PE=1 SV=1	1	1	8	1.015
	O14746	TERT_HUMAN Telomerase reverse transcriptase OS=Homo sapiens GN=TERT PE=1 SV=1	1	1	5	1.015
	O00194	RB27B_HUMAN Ras_related protein Rab_27B OS=Homo sapiens GN=RAB27B PE=1 SV=4	1	1	3	1.015
	Q6ZRQ5	MMS22_HUMAN Protein MMS22_like OS=Homo sapiens GN=MMS22L PE=1 SV=3	1	1	2	1.014
	Q8N3P4	VPS8_HUMAN Vacuolar protein sorting_associated protein 8 homolog OS=Homo sapiens GN=VPS8 PE=1 SV=3	1	1	2	1.014
	Q9NRD8	DUOX2_HUMAN Dual oxidase 2 OS=Homo sapiens GN=DUOX2 PE=1 SV=2	1	1	2	1.014
	Q9NRD9	DUOX1_HUMAN Dual oxidase 1 OS=Homo sapiens GN=DUOX1 PE=1 SV=1	1	1	2	1.014
	Q9UMS5	PHTF1_HUMAN Putative homeodomain transcription factor 1 OS=Homo sapiens GN=PHTF1 PE=2 SV=2	1	1	2	1.014
	Q9HB40	RISC_HUMAN Retinoid_inducible serine carboxypeptidase OS=Homo sapiens GN=SCPEP1 PE=1 SV=1	1	1	3	1.013
	Q8ND61	CC020_HUMAN Uncharacterized protein C3orf20 OS=Homo sapiens GN=C3orf20 PE=1 SV=2	1	1	2	1.013
	Q9NPD8	UBE2T_HUMAN Ubiquitin_conjugating enzyme E2 T OS=Homo sapiens GN=UBE2T PE=1 SV=1	1	1	11	1.012
	P30740	ILEU_HUMAN Leukocyte elastase inhibitor OS=Homo sapiens GN=SERPINB1 PE=1 SV=1	1	1	2	1.012
	Q7Z5L9	I2BP2_HUMAN Interferon regulatory factor 2_binding protein 2 OS=Homo sapiens GN=IRF2BP2 PE=1 SV=2	1	1	2	1.01
	Q9H244	P2Y12_HUMAN P2Y purinoceptor 12 OS=Homo sapiens GN=P2RY12 PE=1 SV=1	1	1	4	1.008
	Q86YQ8	CPNE8_HUMAN Copine_8 OS=Homo sapiens GN=CPNE8 PE=1 SV=2	1	2	16	1.007
	Q6P996	PDXD1_HUMAN Pyridoxal_dependent decarboxylase domain_containing protein 1 OS=Homo sapiens GN=PDXDC1 PE=1 SV=2	1	1	8	1.005
	Q8N4B1	SESQ1_HUMAN Sesquipedalian_1 OS=Homo sapiens GN=FAM109A PE=1 SV=1	1	1	2	1.005
	P49662	CASP4_HUMAN Caspase_4 OS=Homo sapiens GN=CASP4 PE=1 SV=1	1	2	8	1.004
	O95793	STAU1_HUMAN Double_stranded RNA_binding protein Staufen homolog 1 OS=Homo sapiens GN=STAU1 PE=1 SV=2	1	1	3	1.004
	P20783	NTF3_HUMAN Neurotrophin_3 OS=Homo sapiens GN=NTF3 PE=1 SV=1	1	1	3	1.003
	Q9BWD1	THIC_HUMAN Acetyl_CoA acetyltransferase_ cytosolic OS=Homo sapiens GN=ACAT2 PE=1 SV=2	1	1	2	1.003
	P23528	COF1_HUMAN Cofilin_1 OS=Homo sapiens GN=CFL1 PE=1 SV=3	1	2	65	1.002
	Q96JS3	PGBD1_HUMAN PiggyBac transposable element_derived protein 1 OS=Homo sapiens GN=PGBD1 PE=1 SV=1	1	2	15	1.002
	P35609	ACTN2_HUMAN Alpha_actinin_2 OS=Homo sapiens GN=ACTN2 PE=1 SV=1	1	1	7	1.001
	O75593	FOXH1_HUMAN Forkhead box protein H1 OS=Homo sapiens GN=FOXH1 PE=1 SV=1	1	1	3	1.001
	Q9NQP4	PFD4_HUMAN Prefoldin subunit 4 OS=Homo sapiens GN=PFDN4 PE=1 SV=1	1	1	10	0.999
	O43306	ADCY6_HUMAN Adenylate cyclase type 6 OS=Homo sapiens GN=ADCY6 PE=1 SV=2	1	1	4	0.996
	Q99417	MYCBP_HUMAN C_Myc_binding protein OS=Homo sapiens GN=MYCBP PE=1 SV=3	1	1	9	0.994
	P13611	CSPG2_HUMAN Versican core protein OS=Homo sapiens GN=VCAN PE=1 SV=3	1	1	2	0.994
	Q9H910	HN1L_HUMAN Hematological and neurological expressed 1_like protein OS=Homo sapiens GN=HN1L PE=1 SV=1	1	1	18	0.993
	Q06210	GFPT1_HUMAN Glucosamine__fructose_6_phosphate aminotransferase [isomerizing] 1 OS=Homo sapiens GN=GFPT1 PE=1 SV=3	1	1	4	0.993
	O60739	EIF1B_HUMAN Eukaryotic translation initiation factor 1b OS=Homo sapiens GN=EIF1B PE=1 SV=2	1	1	2	0.991
	Q8IVV2	LOXH1_HUMAN Lipoxygenase homology domain_containing protein 1 OS=Homo sapiens GN=LOXHD1 PE=2 SV=3	1	1	2	0.991
	P49189	AL9A1_HUMAN 4_trimethylaminobutyraldehyde dehydrogenase OS=Homo sapiens GN=ALDH9A1 PE=1 SV=3	1	1	9	0.989
	P15144	AMPN_HUMAN Aminopeptidase N OS=Homo sapiens GN=ANPEP PE=1 SV=4	1	1	5	0.989
	Q86UE4	LYRIC_HUMAN Protein LYRIC OS=Homo sapiens GN=MTDH PE=1 SV=2	1	1	5	0.989
	Q9UIF9	BAZ2A_HUMAN Bromodomain adjacent to zinc finger domain protein 2A OS=Homo sapiens GN=BAZ2A PE=1 SV=4	1	1	3	0.989
	P17858	K6PL_HUMAN 6_phosphofructokinase_ liver type OS=Homo sapiens GN=PFKL PE=1 SV=6	1	2	27	0.985
	Q8NC51	PAIRB_HUMAN Plasminogen activator inhibitor 1 RNA_binding protein OS=Homo sapiens GN=SERBP1 PE=1 SV=2	1	2	36	0.983
	Q15370	ELOB_HUMAN Transcription elongation factor B polypeptide 2 OS=Homo sapiens GN=TCEB2 PE=1 SV=1	1	1	2	0.983
	O43809	CPSF5_HUMAN Cleavage and polyadenylation specificity factor subunit 5 OS=Homo sapiens GN=NUDT21 PE=1 SV=1	1	2	11	0.982
	P61201	CSN2_HUMAN COP9 signalosome complex subunit 2 OS=Homo sapiens GN=COPS2 PE=1 SV=1	1	1	10	0.982
	P78396	CCNA1_HUMAN Cyclin_A1 OS=Homo sapiens GN=CCNA1 PE=1 SV=1	1	1	3	0.982
	Q9Y5B9	SP16H_HUMAN FACT complex subunit SPT16 OS=Homo sapiens GN=SUPT16H PE=1 SV=1	1	1	3	0.98
	Q59EK9	RUN3A_HUMAN RUN domain_containing protein 3A OS=Homo sapiens GN=RUNDC3A PE=2 SV=2	1	3	43	0.977
	Q00722	PLCB2_HUMAN 1_phosphatidylinositol 4_5_bisphosphate phosphodiesterase beta_2 OS=Homo sapiens GN=PLCB2 PE=1 SV=2	1	2	3	0.975
	Q9BRQ4	CK070_HUMAN Uncharacterized protein C11orf70 OS=Homo sapiens GN=C11orf70 PE=2 SV=3	1	1	2	0.974
	P29692	EF1D_HUMAN Elongation factor 1_delta OS=Homo sapiens GN=EEF1D PE=1 SV=5	1	1	24	0.973
	Q6ZRM9	YG024_HUMAN Putative uncharacterized protein FLJ46235 OS=Homo sapiens PE=1 SV=1	1	2	15	0.973
	Q5CZ79	AN20B_HUMAN Ankyrin repeat domain_containing protein 20B OS=Homo sapiens GN=ANKRD20A8P PE=2 SV=2	1	1	2	0.973
	Q5TAT6	CODA1_HUMAN Collagen alpha_1(XIII) chain OS=Homo sapiens GN=COL13A1 PE=1 SV=1	1	1	2	0.973
	Q63HK5	TSH3_HUMAN Teashirt homolog 3 OS=Homo sapiens GN=TSHZ3 PE=1 SV=2	1	2	35	0.972
	P08579	RU2B_HUMAN U2 small nuclear ribonucleoprotein B__ OS=Homo sapiens GN=SNRPB2 PE=1 SV=1	1	1	12	0.972
	Q9Y697	NFS1_HUMAN Cysteine desulfurase_ mitochondrial OS=Homo sapiens GN=NFS1 PE=1 SV=3	1	1	6	0.972
	Q9BZZ5	API5_HUMAN Apoptosis inhibitor 5 OS=Homo sapiens GN=API5 PE=1 SV=3	1	1	2	0.972
	Q8N1G4	LRC47_HUMAN Leucine_rich repeat_containing protein 47 OS=Homo sapiens GN=LRRC47 PE=1 SV=1	1	1	12	0.97
	Q7Z589	EMSY_HUMAN Protein EMSY OS=Homo sapiens GN=EMSY PE=1 SV=2	1	1	2	0.97
	Q93100	KPBB_HUMAN Phosphorylase b kinase regulatory subunit beta OS=Homo sapiens GN=PHKB PE=1 SV=3	1	1	2	0.968
	Q99708	COM1_HUMAN DNA endonuclease RBBP8 OS=Homo sapiens GN=RBBP8 PE=1 SV=2	1	1	2	0.966
	P43686	PRS6B_HUMAN 26S protease regulatory subunit 6B OS=Homo sapiens GN=PSMC4 PE=1 SV=2	1	1	10	0.964
	P49902	5NTC_HUMAN Cytosolic purine 5__nucleotidase OS=Homo sapiens GN=NT5C2 PE=1 SV=1	1	1	3	0.964
	Q15738	NSDHL_HUMAN Sterol_4_alpha_carboxylate 3_dehydrogenase_ decarboxylating OS=Homo sapiens GN=NSDHL PE=1 SV=2	1	1	2	0.964
	Q14527	HLTF_HUMAN Helicase_like transcription factor OS=Homo sapiens GN=HLTF PE=1 SV=2	1	2	2	0.964
	Q53H82	LACB2_HUMAN Beta_lactamase_like protein 2 OS=Homo sapiens GN=LACTB2 PE=1 SV=2	1	1	6	0.963
	P0CG20	CP011_HUMAN Uncharacterized protein C16orf11 OS=Homo sapiens GN=C16orf11 PE=2 SV=1	1	1	2	0.96
	P18505	GBRB1_HUMAN Gamma_aminobutyric acid receptor subunit beta_1 OS=Homo sapiens GN=GABRB1 PE=1 SV=2	1	1	2	0.96
	Q14194	DPYL1_HUMAN Dihydropyrimidinase_related protein 1 OS=Homo sapiens GN=CRMP1 PE=1 SV=1	1	2	22	0.959
	Q14195	DPYL3_HUMAN Dihydropyrimidinase_related protein 3 OS=Homo sapiens GN=DPYSL3 PE=1 SV=1	1	2	22	0.959
	Q9H0B8	CRLD2_HUMAN Cysteine_rich secretory protein LCCL domain_containing 2 OS=Homo sapiens GN=CRISPLD2 PE=1 SV=1	1	1	5	0.957
	Q15649	ZNHI3_HUMAN Zinc finger HIT domain_containing protein 3 OS=Homo sapiens GN=ZNHIT3 PE=1 SV=2	1	1	2	0.957
	Q96LT4	SAMD8_HUMAN Sphingomyelin synthase_related protein 1 OS=Homo sapiens GN=SAMD8 PE=2 SV=2	1	1	2	0.957
	Q96Q04	LMTK3_HUMAN Serine/threonine_protein kinase LMTK3 OS=Homo sapiens GN=LMTK3 PE=2 SV=2	1	1	2	0.957
	O94964	K0889_HUMAN Uncharacterized protein KIAA0889 OS=Homo sapiens GN=KIAA0889 PE=1 SV=2	1	1	4	0.955
	Q96GU1	GGEE1_HUMAN G antigen family E member 1 OS=Homo sapiens GN=PAGE5 PE=2 SV=2	1	1	20	0.954
	P54277	PMS1_HUMAN PMS1 protein homolog 1 OS=Homo sapiens GN=PMS1 PE=1 SV=1	1	1	3	0.954
	O15212	PFD6_HUMAN Prefoldin subunit 6 OS=Homo sapiens GN=PFDN6 PE=1 SV=1	1	1	8	0.952
	Q9Y2S0	RPAC2_HUMAN DNA_directed RNA polymerases I and III subunit RPAC2 OS=Homo sapiens GN=POLR1D PE=1 SV=1	1	1	3	0.952
	O75764	TCEA3_HUMAN Transcription elongation factor A protein 3 OS=Homo sapiens GN=TCEA3 PE=2 SV=2	1	1	2	0.95
	Q92917	GPKOW_HUMAN G patch domain and KOW motifs_containing protein OS=Homo sapiens GN=GPKOW PE=1 SV=2	1	1	2	0.949
	Q6P3X8	PGBD2_HUMAN PiggyBac transposable element_derived protein 2 OS=Homo sapiens GN=PGBD2 PE=2 SV=1	1	2	2	0.948
	Q9Y6W5	WASF2_HUMAN Wiskott_Aldrich syndrome protein family member 2 OS=Homo sapiens GN=WASF2 PE=1 SV=3	1	2	6	0.945
	Q13523	PRP4B_HUMAN Serine/threonine_protein kinase PRP4 homolog OS=Homo sapiens GN=PRPF4B PE=1 SV=3	1	1	3	0.942
	Q8TEW8	PAR3L_HUMAN Partitioning defective 3 homolog B OS=Homo sapiens GN=PARD3B PE=1 SV=2	1	1	2	0.942
	P00738	HPT_HUMAN Haptoglobin OS=Homo sapiens GN=HP PE=1 SV=1	1	2	5	0.941
	P00739	HPTR_HUMAN Haptoglobin_related protein OS=Homo sapiens GN=HPR PE=1 SV=2	1	2	5	0.941
	P55010	IF5_HUMAN Eukaryotic translation initiation factor 5 OS=Homo sapiens GN=EIF5 PE=1 SV=2	1	1	18	0.94
	Q8NFH4	NUP37_HUMAN Nucleoporin Nup37 OS=Homo sapiens GN=NUP37 PE=1 SV=1	1	1	5	0.936
	P61970	NTF2_HUMAN Nuclear transport factor 2 OS=Homo sapiens GN=NUTF2 PE=1 SV=1	1	2	9	0.935
	Q96AV8	E2F7_HUMAN Transcription factor E2F7 OS=Homo sapiens GN=E2F7 PE=1 SV=3	1	1	5	0.935
	Q5VWN6	F208B_HUMAN Protein FAM208B OS=Homo sapiens GN=FAM208B PE=1 SV=1	1	1	2	0.935
	Q8TDD5	MCLN3_HUMAN Mucolipin_3 OS=Homo sapiens GN=MCOLN3 PE=2 SV=1	1	1	2	0.935
	Q9Y2A7	NCKP1_HUMAN Nck_associated protein 1 OS=Homo sapiens GN=NCKAP1 PE=1 SV=1	1	1	2	0.935
	Q16658	FSCN1_HUMAN Fascin OS=Homo sapiens GN=FSCN1 PE=1 SV=3	1	1	10	0.934
	P60953	CDC42_HUMAN Cell division control protein 42 homolog OS=Homo sapiens GN=CDC42 PE=1 SV=2	1	2	2	0.934
	P23229	ITA6_HUMAN Integrin alpha_6 OS=Homo sapiens GN=ITGA6 PE=1 SV=4	1	1	2	0.933
	Q32MZ4	LRRF1_HUMAN Leucine_rich repeat flightless_interacting protein 1 OS=Homo sapiens GN=LRRFIP1 PE=1 SV=2	1	1	2	0.933
	Q7Z5M5	TMC3_HUMAN Transmembrane channel_like protein 3 OS=Homo sapiens GN=TMC3 PE=1 SV=3	1	1	2	0.931
	Q16650	TBR1_HUMAN T_box brain protein 1 OS=Homo sapiens GN=TBR1 PE=1 SV=1	1	1	9	0.93
	A6NM62	LRC53_HUMAN Leucine_rich repeat_containing protein 53 OS=Homo sapiens GN=LRRC53 PE=4 SV=2	1	1	7	0.93
	Q8WZA0	LZIC_HUMAN Protein LZIC OS=Homo sapiens GN=LZIC PE=1 SV=1	1	1	3	0.93
	O43670	ZN207_HUMAN Zinc finger protein 207 OS=Homo sapiens GN=ZNF207 PE=1 SV=1	1	1	11	0.928
	Q8N8A2	ANR44_HUMAN Serine/threonine_protein phosphatase 6 regulatory ankyrin repeat subunit B OS=Homo sapiens GN=ANKRD44 PE=1 SV=3	1	2	6	0.924
	A8MQ27	NEU1B_HUMAN E3 ubiquitin_protein ligase NEURL1B OS=Homo sapiens GN=NEURL1B PE=3 SV=1	1	1	6	0.923
	P35247	SFTPD_HUMAN Pulmonary surfactant_associated protein D OS=Homo sapiens GN=SFTPD PE=1 SV=3	1	1	3	0.923
	O95626	AN32D_HUMAN Acidic leucine_rich nuclear phosphoprotein 32 family member D OS=Homo sapiens GN=ANP32D PE=1 SV=2	1	2	9	0.922
	Q9BQA1	MEP50_HUMAN Methylosome protein 50 OS=Homo sapiens GN=WDR77 PE=1 SV=1	1	1	4	0.922
	P47914	RL29_HUMAN 60S ribosomal protein L29 OS=Homo sapiens GN=RPL29 PE=1 SV=2	1	1	28	0.921
	P05455	LA_HUMAN Lupus La protein OS=Homo sapiens GN=SSB PE=1 SV=2	1	1	12	0.918
	Q7Z601	GP142_HUMAN Probable G_protein coupled receptor 142 OS=Homo sapiens GN=GPR142 PE=2 SV=1	1	2	8	0.918
	Q9UQE7	SMC3_HUMAN Structural maintenance of chromosomes protein 3 OS=Homo sapiens GN=SMC3 PE=1 SV=2	1	1	3	0.917
	Q07955	SRSF1_HUMAN Serine/arginine_rich splicing factor 1 OS=Homo sapiens GN=SRSF1 PE=1 SV=2	1	1	10	0.916
	Q8N0S2	SYCE1_HUMAN Synaptonemal complex central element protein 1 OS=Homo sapiens GN=SYCE1 PE=2 SV=2	1	1	6	0.914
	Q9UQ35	SRRM2_HUMAN Serine/arginine repetitive matrix protein 2 OS=Homo sapiens GN=SRRM2 PE=1 SV=2	1	1	14	0.911
	Q96LB3	IFT74_HUMAN Intraflagellar transport protein 74 homolog OS=Homo sapiens GN=IFT74 PE=2 SV=1	1	1	4	0.911
	P53814	SMTN_HUMAN Smoothelin OS=Homo sapiens GN=SMTN PE=1 SV=7	1	1	3	0.911
	Q33E94	RFX4_HUMAN Transcription factor RFX4 OS=Homo sapiens GN=RFX4 PE=1 SV=2	1	1	3	0.91
	O43909	EXTL3_HUMAN Exostosin_like 3 OS=Homo sapiens GN=EXTL3 PE=2 SV=1	1	2	16	0.909
	P62714	PP2AB_HUMAN Serine/threonine_protein phosphatase 2A catalytic subunit beta isoform OS=Homo sapiens GN=PPP2CB PE=1 SV=1	1	2	17	0.908
	P67775	PP2AA_HUMAN Serine/threonine_protein phosphatase 2A catalytic subunit alpha isoform OS=Homo sapiens GN=PPP2CA PE=1 SV=1	1	2	17	0.908
	Q9NVV0	TM38B_HUMAN Trimeric intracellular cation channel type B OS=Homo sapiens GN=TMEM38B PE=1 SV=1	1	1	2	0.908
	Q8IZD0	SAM14_HUMAN Sterile alpha motif domain_containing protein 14 OS=Homo sapiens GN=SAMD14 PE=2 SV=2	1	1	2	0.907
	Q14697	GANAB_HUMAN Neutral alpha_glucosidase AB OS=Homo sapiens GN=GANAB PE=1 SV=3	1	2	11	0.906
	P49792	RBP2_HUMAN E3 SUMO_protein ligase RanBP2 OS=Homo sapiens GN=RANBP2 PE=1 SV=2	1	2	4	0.906
	Q9H853	TBA4B_HUMAN Putative tubulin_like protein alpha_4B OS=Homo sapiens GN=TUBA4B PE=5 SV=2	1	1	33	0.905
	P0C862	C1T9A_HUMAN Complement C1q and tumor necrosis factor_related protein 9A OS=Homo sapiens GN=C1QTNF9 PE=1 SV=1	1	1	23	0.904
	Q15397	K0020_HUMAN Pumilio domain_containing protein KIAA0020 OS=Homo sapiens GN=KIAA0020 PE=1 SV=3	1	1	15	0.904
	Q9Y5N6	ORC6_HUMAN Origin recognition complex subunit 6 OS=Homo sapiens GN=ORC6 PE=1 SV=1	1	1	6	0.904
	Q7Z460	CLAP1_HUMAN CLIP_associating protein 1 OS=Homo sapiens GN=CLASP1 PE=1 SV=1	1	1	3	0.904
	P24385	CCND1_HUMAN G1/S_specific cyclin_D1 OS=Homo sapiens GN=CCND1 PE=1 SV=1	1	1	2	0.904
	Q14667	K0100_HUMAN UPF0378 protein KIAA0100 OS=Homo sapiens GN=KIAA0100 PE=1 SV=3	1	1	2	0.904
	Q9NWU5	RM22_HUMAN 39S ribosomal protein L22_ mitochondrial OS=Homo sapiens GN=MRPL22 PE=1 SV=1	1	2	2	0.904
	P62841	RS15_HUMAN 40S ribosomal protein S15 OS=Homo sapiens GN=RPS15 PE=1 SV=2	1	1	26	0.903
	P48378	RFX2_HUMAN DNA_binding protein RFX2 OS=Homo sapiens GN=RFX2 PE=2 SV=2	1	1	3	0.903
	A6NNZ2	TBB8B_HUMAN Tubulin beta_8 chain B OS=Homo sapiens PE=1 SV=1	1	6	119	0.901
	Q3ZCM7	TBB8_HUMAN Tubulin beta_8 chain OS=Homo sapiens GN=TUBB8 PE=1 SV=2	1	6	119	0.901
	Q6P2D8	XRRA1_HUMAN X_ray radiation resistance_associated protein 1 OS=Homo sapiens GN=XRRA1 PE=2 SV=2	1	1	27	0.901
	P09211	GSTP1_HUMAN Glutathione S_transferase P OS=Homo sapiens GN=GSTP1 PE=1 SV=2	1	3	63	0.9
	Q5T6S3	PHF19_HUMAN PHD finger protein 19 OS=Homo sapiens GN=PHF19 PE=1 SV=1	1	1	4	0.9
	P51858	HDGF_HUMAN Hepatoma_derived growth factor OS=Homo sapiens GN=HDGF PE=1 SV=1	1	1	13	0.899
	A4D1S0	KLRG2_HUMAN Killer cell lectin_like receptor subfamily G member 2 OS=Homo sapiens GN=KLRG2 PE=1 SV=3	1	1	16	0.898
	Q96GD3	SCMH1_HUMAN Polycomb protein SCMH1 OS=Homo sapiens GN=SCMH1 PE=1 SV=1	1	1	2	0.898
	P11177	ODPB_HUMAN Pyruvate dehydrogenase E1 component subunit beta_ mitochondrial OS=Homo sapiens GN=PDHB PE=1 SV=3	1	1	3	0.897
	P14678	RSMB_HUMAN Small nuclear ribonucleoprotein_associated proteins B and B_ OS=Homo sapiens GN=SNRPB PE=1 SV=2	1	1	3	0.896
	P63162	RSMN_HUMAN Small nuclear ribonucleoprotein_associated protein N OS=Homo sapiens GN=SNRPN PE=1 SV=1	1	1	3	0.896
	Q99590	SCAFB_HUMAN Protein SCAF11 OS=Homo sapiens GN=SCAF11 PE=1 SV=2	1	1	2	0.896
	O94788	AL1A2_HUMAN Retinal dehydrogenase 2 OS=Homo sapiens GN=ALDH1A2 PE=1 SV=3	1	1	20	0.895
	P02008	HBAZ_HUMAN Hemoglobin subunit zeta OS=Homo sapiens GN=HBZ PE=1 SV=2	1	1	6	0.893
	Q9NQW7	XPP1_HUMAN Xaa_Pro aminopeptidase 1 OS=Homo sapiens GN=XPNPEP1 PE=1 SV=3	1	1	7	0.891
	Q9C0A1	ZFHX2_HUMAN Zinc finger homeobox protein 2 OS=Homo sapiens GN=ZFHX2 PE=2 SV=3	1	1	3	0.891
	Q15459	SF3A1_HUMAN Splicing factor 3A subunit 1 OS=Homo sapiens GN=SF3A1 PE=1 SV=1	1	2	14	0.89
	Q8TF66	LRC15_HUMAN Leucine_rich repeat_containing protein 15 OS=Homo sapiens GN=LRRC15 PE=1 SV=2	1	2	9	0.89
	Q6NWY9	PR40B_HUMAN Pre_mRNA_processing factor 40 homolog B OS=Homo sapiens GN=PRPF40B PE=1 SV=1	1	1	3	0.89
	O43488	ARK72_HUMAN Aflatoxin B1 aldehyde reductase member 2 OS=Homo sapiens GN=AKR7A2 PE=1 SV=3	1	2	3	0.89
	Q15428	SF3A2_HUMAN Splicing factor 3A subunit 2 OS=Homo sapiens GN=SF3A2 PE=1 SV=2	1	2	18	0.886
	Q8NFW8	NEUA_HUMAN N_acylneuraminate cytidylyltransferase OS=Homo sapiens GN=CMAS PE=1 SV=2	1	1	2	0.886
	Q96PB1	CASD1_HUMAN CAS1 domain_containing protein 1 OS=Homo sapiens GN=CASD1 PE=2 SV=1	1	2	2	0.886
	Q9BY32	ITPA_HUMAN Inosine triphosphate pyrophosphatase OS=Homo sapiens GN=ITPA PE=1 SV=2	1	2	9	0.885
	P35900	K1C20_HUMAN Keratin_ type I cytoskeletal 20 OS=Homo sapiens GN=KRT20 PE=1 SV=1	1	3	7	0.885
	Q6PRD1	GP179_HUMAN Probable G_protein coupled receptor 179 OS=Homo sapiens GN=GPR179 PE=2 SV=2	1	3	5	0.885
	P58107	EPIPL_HUMAN Epiplakin OS=Homo sapiens GN=EPPK1 PE=1 SV=2	1	1	2	0.884
	Q92698	RAD54_HUMAN DNA repair and recombination protein RAD54_like OS=Homo sapiens GN=RAD54L PE=1 SV=2	1	1	6	0.883
	Q86YS3	RFIP4_HUMAN Rab11 family_interacting protein 4 OS=Homo sapiens GN=RAB11FIP4 PE=1 SV=1	1	1	6	0.882
	Q13126	MTAP_HUMAN S_methyl_5__thioadenosine phosphorylase OS=Homo sapiens GN=MTAP PE=1 SV=2	1	1	5	0.882
	Q5T890	RAD26_HUMAN Putative DNA repair and recombination protein RAD26_like OS=Homo sapiens GN=RAD26L PE=1 SV=1	1	1	2	0.882
	Q9BVK2	ALG8_HUMAN Probable dolichyl pyrophosphate Glc1Man9GlcNAc2 alpha_1_3_glucosyltransferase OS=Homo sapiens GN=ALG8 PE=1 SV=2	1	1	2	0.882
	Q96PX6	CC85A_HUMAN Coiled_coil domain_containing protein 85A OS=Homo sapiens GN=CCDC85A PE=2 SV=3	1	1	4	0.88
	O95466	FMNL_HUMAN Formin_like protein 1 OS=Homo sapiens GN=FMNL1 PE=1 SV=3	1	1	10	0.879
	Q8NCG5	CHST4_HUMAN Carbohydrate sulfotransferase 4 OS=Homo sapiens GN=CHST4 PE=1 SV=2	1	1	3	0.879
	P46952	3HAO_HUMAN 3_hydroxyanthranilate 3_4_dioxygenase OS=Homo sapiens GN=HAAO PE=1 SV=2	1	1	2	0.879
	Q8N4T4	CI100_HUMAN Vav_like protein C9orf100 OS=Homo sapiens GN=C9orf100 PE=2 SV=1	1	1	2	0.879
	Q8N7P1	PLD5_HUMAN Inactive phospholipase D5 OS=Homo sapiens GN=PLD5 PE=2 SV=2	1	1	2	0.878
	P68036	UB2L3_HUMAN Ubiquitin_conjugating enzyme E2 L3 OS=Homo sapiens GN=UBE2L3 PE=1 SV=1	1	3	24	0.877
	P84090	ERH_HUMAN Enhancer of rudimentary homolog OS=Homo sapiens GN=ERH PE=1 SV=1	1	1	4	0.877
	Q04759	KPCT_HUMAN Protein kinase C theta type OS=Homo sapiens GN=PRKCQ PE=1 SV=3	1	1	2	0.876
	Q8WXA3	RUFY2_HUMAN RUN and FYVE domain_containing protein 2 OS=Homo sapiens GN=RUFY2 PE=1 SV=2	1	1	4	0.875
	Q6IQ32	ADNP2_HUMAN ADNP homeobox protein 2 OS=Homo sapiens GN=ADNP2 PE=1 SV=1	1	1	3	0.875
	Q96ST8	CEP89_HUMAN Centrosomal protein of 89 kDa OS=Homo sapiens GN=CEP89 PE=1 SV=3	1	2	2	0.874
	P62310	LSM3_HUMAN U6 snRNA_associated Sm_like protein LSm3 OS=Homo sapiens GN=LSM3 PE=1 SV=2	1	1	6	0.873
	Q8IVF5	TIAM2_HUMAN T_lymphoma invasion and metastasis_inducing protein 2 OS=Homo sapiens GN=TIAM2 PE=2 SV=4	1	2	3	0.872
	Q5U5Z8	CBPC2_HUMAN Cytosolic carboxypeptidase 2 OS=Homo sapiens GN=AGBL2 PE=2 SV=2	1	1	9	0.87
	Q63HN8	RN213_HUMAN E3 ubiquitin_protein ligase RNF213 OS=Homo sapiens GN=RNF213 PE=1 SV=3	1	2	2	0.87
	Q69YN4	VIR_HUMAN Protein virilizer homolog OS=Homo sapiens GN=KIAA1429 PE=1 SV=2	1	2	32	0.869
	C9JLR9	CK095_HUMAN Uncharacterized protein C11orf95 OS=Homo sapiens GN=C11orf95 PE=2 SV=1	1	1	2	0.868
	Q7Z407	CSMD3_HUMAN CUB and sushi domain_containing protein 3 OS=Homo sapiens GN=CSMD3 PE=2 SV=3	1	1	2	0.868
	Q8NF50	DOCK8_HUMAN Dedicator of cytokinesis protein 8 OS=Homo sapiens GN=DOCK8 PE=1 SV=3	1	1	2	0.865
	Q99801	NKX31_HUMAN Homeobox protein Nkx_3.1 OS=Homo sapiens GN=NKX3_1 PE=1 SV=2	1	1	2	0.865
	P33992	MCM5_HUMAN DNA replication licensing factor MCM5 OS=Homo sapiens GN=MCM5 PE=1 SV=5	1	1	13	0.863
	Q9H6L5	F134B_HUMAN Protein FAM134B OS=Homo sapiens GN=FAM134B PE=2 SV=1	1	1	6	0.863
	Q01959	SC6A3_HUMAN Sodium_dependent dopamine transporter OS=Homo sapiens GN=SLC6A3 PE=1 SV=1	1	1	3	0.863
	B2RXH2	KDM4E_HUMAN Lysine_specific demethylase 4E OS=Homo sapiens GN=KDM4E PE=1 SV=1	1	1	2	0.863
	Q9UBS9	OSPT_HUMAN Protein osteopotentia homolog OS=Homo sapiens GN=C1orf9 PE=2 SV=1	1	1	2	0.862
	P26373	RL13_HUMAN 60S ribosomal protein L13 OS=Homo sapiens GN=RPL13 PE=1 SV=4	1	1	41	0.861
	Q6P5R6	RL22L_HUMAN 60S ribosomal protein L22_like 1 OS=Homo sapiens GN=RPL22L1 PE=1 SV=2	1	1	8	0.859
	O75506	HSBP1_HUMAN Heat shock factor_binding protein 1 OS=Homo sapiens GN=HSBP1 PE=1 SV=1	1	1	7	0.858
	P16157	ANK1_HUMAN Ankyrin_1 OS=Homo sapiens GN=ANK1 PE=1 SV=3	1	1	2	0.858
	Q63ZY3	KANK2_HUMAN KN motif and ankyrin repeat domain_containing protein 2 OS=Homo sapiens GN=KANK2 PE=1 SV=1	1	1	2	0.858
	Q13501	SQSTM_HUMAN Sequestosome_1 OS=Homo sapiens GN=SQSTM1 PE=1 SV=1	1	1	21	0.855
	Q08043	ACTN3_HUMAN Alpha_actinin_3 OS=Homo sapiens GN=ACTN3 PE=1 SV=2	1	1	6	0.855
	Q04609	FOLH1_HUMAN Glutamate carboxypeptidase 2 OS=Homo sapiens GN=FOLH1 PE=1 SV=1	1	1	2	0.855
	P51572	BAP31_HUMAN B_cell receptor_associated protein 31 OS=Homo sapiens GN=BCAP31 PE=1 SV=3	1	1	14	0.853
	Q5M775	CYTSB_HUMAN Cytospin_B OS=Homo sapiens GN=SPECC1 PE=1 SV=1	1	1	4	0.853
	Q00341	VIGLN_HUMAN Vigilin OS=Homo sapiens GN=HDLBP PE=1 SV=2	1	1	3	0.853
	O60287	NPA1P_HUMAN Nucleolar pre_ribosomal_associated protein 1 OS=Homo sapiens GN=URB1 PE=1 SV=4	1	1	2	0.853
	Q8ND07	CN045_HUMAN Uncharacterized protein C14orf45 OS=Homo sapiens GN=C14orf45 PE=1 SV=3	1	1	2	0.853
	Q01538	MYT1_HUMAN Myelin transcription factor 1 OS=Homo sapiens GN=MYT1 PE=1 SV=2	1	1	2	0.853
	Q96LA5	FCRL2_HUMAN Fc receptor_like protein 2 OS=Homo sapiens GN=FCRL2 PE=1 SV=1	1	1	2	0.851
	Q9C099	LRCC1_HUMAN Leucine_rich repeat and coiled_coil domain_containing protein 1 OS=Homo sapiens GN=LRRCC1 PE=2 SV=2	1	1	7	0.85
	O75054	IGSF3_HUMAN Immunoglobulin superfamily member 3 OS=Homo sapiens GN=IGSF3 PE=1 SV=3	1	2	5	0.85
	O15247	CLIC2_HUMAN Chloride intracellular channel protein 2 OS=Homo sapiens GN=CLIC2 PE=1 SV=3	1	1	4	0.85
	Q92765	SFRP3_HUMAN Secreted frizzled_related protein 3 OS=Homo sapiens GN=FRZB PE=1 SV=2	1	1	4	0.85
	P09001	RM03_HUMAN 39S ribosomal protein L3_ mitochondrial OS=Homo sapiens GN=MRPL3 PE=1 SV=1	1	2	2	0.85
	Q8WWL2	SPIR2_HUMAN Protein spire homolog 2 OS=Homo sapiens GN=SPIRE2 PE=1 SV=3	1	1	2	0.85
	Q8NB90	SPAT5_HUMAN Spermatogenesis_associated protein 5 OS=Homo sapiens GN=SPATA5 PE=1 SV=3	1	1	12	0.848
	P62158	CALM_HUMAN Calmodulin OS=Homo sapiens GN=CALM1 PE=1 SV=2	1	1	6	0.844
	P48739	PIPNB_HUMAN Phosphatidylinositol transfer protein beta isoform OS=Homo sapiens GN=PITPNB PE=1 SV=2	1	1	7	0.843
	Q9C075	K1C23_HUMAN Keratin_ type I cytoskeletal 23 OS=Homo sapiens GN=KRT23 PE=1 SV=2	1	1	8	0.841
	Q9C0A0	CNTP4_HUMAN Contactin_associated protein_like 4 OS=Homo sapiens GN=CNTNAP4 PE=1 SV=3	1	1	3	0.841
	Q13621	S12A1_HUMAN Solute carrier family 12 member 1 OS=Homo sapiens GN=SLC12A1 PE=1 SV=2	1	1	3	0.833
	P51784	UBP11_HUMAN Ubiquitin carboxyl_terminal hydrolase 11 OS=Homo sapiens GN=USP11 PE=1 SV=3	1	1	2	0.83
	P35606	COPB2_HUMAN Coatomer subunit beta_ OS=Homo sapiens GN=COPB2 PE=1 SV=2	1	1	8	0.822
	Q8IZ69	TRM2A_HUMAN tRNA (uracil_5_)_methyltransferase homolog A OS=Homo sapiens GN=TRMT2A PE=1 SV=2	1	1	5	0.822
	Q9BX63	FANCJ_HUMAN Fanconi anemia group J protein OS=Homo sapiens GN=BRIP1 PE=1 SV=1	1	1	2	0.822
	Q9BY07	S4A5_HUMAN Electrogenic sodium bicarbonate cotransporter 4 OS=Homo sapiens GN=SLC4A5 PE=2 SV=2	1	1	2	0.822
	P20700	LMNB1_HUMAN Lamin_B1 OS=Homo sapiens GN=LMNB1 PE=1 SV=2	1	2	4	0.82
	O60841	IF2P_HUMAN Eukaryotic translation initiation factor 5B OS=Homo sapiens GN=EIF5B PE=1 SV=4	1	1	4	0.82
	Q8IZJ3	CPMD8_HUMAN C3 and PZP_like alpha_2_macroglobulin domain_containing protein 8 OS=Homo sapiens GN=CPAMD8 PE=1 SV=2	1	2	21	0.818
	P52788	SPSY_HUMAN Spermine synthase OS=Homo sapiens GN=SMS PE=1 SV=2	1	2	8	0.818
	Q6ZQR2	CI171_HUMAN Uncharacterized protein C9orf171 OS=Homo sapiens GN=C9orf171 PE=2 SV=1	1	1	6	0.816
	A8MTJ3	GNAT3_HUMAN Guanine nucleotide_binding protein G(t) subunit alpha_3 OS=Homo sapiens GN=GNAT3 PE=2 SV=2	1	1	3	0.815
	P43034	LIS1_HUMAN Platelet_activating factor acetylhydrolase IB subunit alpha OS=Homo sapiens GN=PAFAH1B1 PE=1 SV=2	1	2	11	0.814
	Q9UMS6	SYNP2_HUMAN Synaptopodin_2 OS=Homo sapiens GN=SYNPO2 PE=1 SV=2	1	1	2	0.812
	P00441	SODC_HUMAN Superoxide dismutase [Cu_Zn] OS=Homo sapiens GN=SOD1 PE=1 SV=2	1	1	24	0.81
	Q15819	UB2V2_HUMAN Ubiquitin_conjugating enzyme E2 variant 2 OS=Homo sapiens GN=UBE2V2 PE=1 SV=4	1	2	24	0.81
	P63241	IF5A1_HUMAN Eukaryotic translation initiation factor 5A_1 OS=Homo sapiens GN=EIF5A PE=1 SV=2	1	3	53	0.807
	P41743	KPCI_HUMAN Protein kinase C iota type OS=Homo sapiens GN=PRKCI PE=1 SV=2	1	1	3	0.806
	Q17RD7	SYT16_HUMAN Synaptotagmin_16 OS=Homo sapiens GN=SYT16 PE=2 SV=2	1	2	2	0.805
	Q9Y696	CLIC4_HUMAN Chloride intracellular channel protein 4 OS=Homo sapiens GN=CLIC4 PE=1 SV=4	1	1	2	0.804
	Q6ZN28	MACC1_HUMAN Metastasis_associated in colon cancer protein 1 OS=Homo sapiens GN=MACC1 PE=1 SV=2	1	1	6	0.801
	P52907	CAZA1_HUMAN F_actin_capping protein subunit alpha_1 OS=Homo sapiens GN=CAPZA1 PE=1 SV=3	1	2	25	0.799
	P06396	GELS_HUMAN Gelsolin OS=Homo sapiens GN=GSN PE=1 SV=1	1	2	14	0.799
	P62495	ERF1_HUMAN Eukaryotic peptide chain release factor subunit 1 OS=Homo sapiens GN=ETF1 PE=1 SV=3	1	2	10	0.799
	Q9UBC5	MYO1A_HUMAN Unconventional myosin_Ia OS=Homo sapiens GN=MYO1A PE=1 SV=1	1	1	5	0.798
	Q9BU76	MMTA2_HUMAN Multiple myeloma tumor_associated protein 2 OS=Homo sapiens GN=MMTAG2 PE=1 SV=1	1	1	4	0.798
	Q96JJ3	ELMO2_HUMAN Engulfment and cell motility protein 2 OS=Homo sapiens GN=ELMO2 PE=1 SV=2	1	1	2	0.798
	Q9GZU0	CF062_HUMAN Uncharacterized protein C6orf62 OS=Homo sapiens GN=C6orf62 PE=2 SV=1	1	1	2	0.798
	O75787	RENR_HUMAN Renin receptor OS=Homo sapiens GN=ATP6AP2 PE=1 SV=2	1	1	6	0.795
	Q8WWZ4	ABCAA_HUMAN ATP_binding cassette sub_family A member 10 OS=Homo sapiens GN=ABCA10 PE=1 SV=3	1	1	9	0.794
	Q14031	CO4A6_HUMAN Collagen alpha_6(IV) chain OS=Homo sapiens GN=COL4A6 PE=2 SV=3	1	2	4	0.793
	Q16851	UGPA_HUMAN UTP__glucose_1_phosphate uridylyltransferase OS=Homo sapiens GN=UGP2 PE=1 SV=5	1	1	9	0.791
	Q92766	RREB1_HUMAN Ras_responsive element_binding protein 1 OS=Homo sapiens GN=RREB1 PE=1 SV=3	1	2	8	0.79
	Q13520	AQP6_HUMAN Aquaporin_6 OS=Homo sapiens GN=AQP6 PE=2 SV=2	1	1	2	0.79
	P31689	DNJA1_HUMAN DnaJ homolog subfamily A member 1 OS=Homo sapiens GN=DNAJA1 PE=1 SV=2	1	2	31	0.781
	Q8NI35	INADL_HUMAN InaD_like protein OS=Homo sapiens GN=INADL PE=1 SV=3	1	1	2	0.777
	P62888	RL30_HUMAN 60S ribosomal protein L30 OS=Homo sapiens GN=RPL30 PE=1 SV=2	1	1	22	0.776
	Q02224	CENPE_HUMAN Centromere_associated protein E OS=Homo sapiens GN=CENPE PE=1 SV=2	1	1	5	0.776
	Q9ULI0	ATD2B_HUMAN ATPase family AAA domain_containing protein 2B OS=Homo sapiens GN=ATAD2B PE=1 SV=3	1	1	2	0.776
	Q8IWB6	TEX14_HUMAN Inactive serine/threonine_protein kinase TEX14 OS=Homo sapiens GN=TEX14 PE=1 SV=2	1	1	15	0.773
	Q96LB4	VATG3_HUMAN V_type proton ATPase subunit G 3 OS=Homo sapiens GN=ATP6V1G3 PE=2 SV=1	1	1	8	0.773
	Q9GZS0	DNAI2_HUMAN Dynein intermediate chain 2_ axonemal OS=Homo sapiens GN=DNAI2 PE=1 SV=2	1	1	8	0.773
	O75197	LRP5_HUMAN Low_density lipoprotein receptor_related protein 5 OS=Homo sapiens GN=LRP5 PE=1 SV=2	1	1	2	0.768
	Q9Y6F7	CDY2_HUMAN Testis_specific chromodomain protein Y 2 OS=Homo sapiens GN=CDY2A PE=1 SV=1	1	1	26	0.763
	Q9Y6F8	CDY1_HUMAN Testis_specific chromodomain protein Y 1 OS=Homo sapiens GN=CDY1 PE=1 SV=1	1	1	26	0.763
	P55198	AF17_HUMAN Protein AF_17 OS=Homo sapiens GN=MLLT6 PE=1 SV=2	1	1	14	0.763
	P29475	NOS1_HUMAN Nitric oxide synthase_ brain OS=Homo sapiens GN=NOS1 PE=1 SV=2	1	1	3	0.763
	O95163	ELP1_HUMAN Elongator complex protein 1 OS=Homo sapiens GN=IKBKAP PE=1 SV=3	1	1	2	0.761
	P61513	RL37A_HUMAN 60S ribosomal protein L37a OS=Homo sapiens GN=RPL37A PE=1 SV=2	1	1	7	0.758
	Q8NE63	HIPK4_HUMAN Homeodomain_interacting protein kinase 4 OS=Homo sapiens GN=HIPK4 PE=2 SV=1	1	1	2	0.758
	Q8IY92	SLX4_HUMAN Structure_specific endonuclease subunit SLX4 OS=Homo sapiens GN=SLX4 PE=1 SV=3	1	1	6	0.757
	O76094	SRP72_HUMAN Signal recognition particle 72 kDa protein OS=Homo sapiens GN=SRP72 PE=1 SV=3	1	1	12	0.756
	Q2M1Z3	RHG31_HUMAN Rho GTPase_activating protein 31 OS=Homo sapiens GN=ARHGAP31 PE=1 SV=2	1	1	2	0.754
	Q9GZS9	CHST5_HUMAN Carbohydrate sulfotransferase 5 OS=Homo sapiens GN=CHST5 PE=2 SV=3	1	1	3	0.748
	Q9NRE2	TSH2_HUMAN Teashirt homolog 2 OS=Homo sapiens GN=TSHZ2 PE=1 SV=3	1	1	3	0.743
	Q9Y2T7	YBOX2_HUMAN Y_box_binding protein 2 OS=Homo sapiens GN=YBX2 PE=1 SV=2	1	2	23	0.742
	Q5F1R6	DJC21_HUMAN DnaJ homolog subfamily C member 21 OS=Homo sapiens GN=DNAJC21 PE=1 SV=2	1	1	2	0.739
	Q8TDQ7	GNPI2_HUMAN Glucosamine_6_phosphate isomerase 2 OS=Homo sapiens GN=GNPDA2 PE=1 SV=1	1	1	5	0.737
	Q9Y2N7	HIF3A_HUMAN Hypoxia_inducible factor 3_alpha OS=Homo sapiens GN=HIF3A PE=1 SV=2	1	1	2	0.737
	Q96KK3	KCNS1_HUMAN Potassium voltage_gated channel subfamily S member 1 OS=Homo sapiens GN=KCNS1 PE=2 SV=2	1	1	11	0.732
	O15498	YKT6_HUMAN Synaptobrevin homolog YKT6 OS=Homo sapiens GN=YKT6 PE=1 SV=1	1	1	11	0.73
	Q9BQT9	CSTN3_HUMAN Calsyntenin_3 OS=Homo sapiens GN=CLSTN3 PE=1 SV=1	1	2	2	0.73
	Q12792	TWF1_HUMAN Twinfilin_1 OS=Homo sapiens GN=TWF1 PE=1 SV=3	1	2	11	0.727
	O43633	CHM2A_HUMAN Charged multivesicular body protein 2a OS=Homo sapiens GN=CHMP2A PE=1 SV=1	1	1	4	0.723
	Q9GZR7	DDX24_HUMAN ATP_dependent RNA helicase DDX24 OS=Homo sapiens GN=DDX24 PE=1 SV=1	1	1	3	0.723
	Q68CJ6	SLIP_HUMAN GTPase SLIP_GC OS=Homo sapiens GN=C8orf80 PE=1 SV=3	1	1	2	0.723
	Q96DU9	PABP5_HUMAN Polyadenylate_binding protein 5 OS=Homo sapiens GN=PABPC5 PE=1 SV=1	1	1	10	0.721
	O75400	PR40A_HUMAN Pre_mRNA_processing factor 40 homolog A OS=Homo sapiens GN=PRPF40A PE=1 SV=2	1	1	4	0.72
	Q9BTW9	TBCD_HUMAN Tubulin_specific chaperone D OS=Homo sapiens GN=TBCD PE=1 SV=2	1	1	4	0.717
	Q13191	CBLB_HUMAN E3 ubiquitin_protein ligase CBL_B OS=Homo sapiens GN=CBLB PE=1 SV=2	1	1	3	0.717
	Q6T310	RSLBA_HUMAN Ras_like protein family member 11A OS=Homo sapiens GN=RASL11A PE=2 SV=1	1	2	3	0.716
	P30086	PEBP1_HUMAN Phosphatidylethanolamine_binding protein 1 OS=Homo sapiens GN=PEBP1 PE=1 SV=3	1	1	10	0.714
	Q07812	BAX_HUMAN Apoptosis regulator BAX OS=Homo sapiens GN=BAX PE=1 SV=1	1	1	5	0.714
	Q9UQM7	KCC2A_HUMAN Calcium/calmodulin_dependent protein kinase type II subunit alpha OS=Homo sapiens GN=CAMK2A PE=1 SV=2	1	1	4	0.711
	P31949	S10AB_HUMAN Protein S100_A11 OS=Homo sapiens GN=S100A11 PE=1 SV=2	1	2	41	0.705
	Q96HJ3	CCD34_HUMAN Coiled_coil domain_containing protein 34 OS=Homo sapiens GN=CCDC34 PE=2 SV=2	1	1	3	0.705
	P50454	SERPH_HUMAN Serpin H1 OS=Homo sapiens GN=SERPINH1 PE=1 SV=2	1	1	4	0.703
	P13804	ETFA_HUMAN Electron transfer flavoprotein subunit alpha_ mitochondrial OS=Homo sapiens GN=ETFA PE=1 SV=1	1	1	2	0.69
	Q9NUQ6	SPS2L_HUMAN SPATS2_like protein OS=Homo sapiens GN=SPATS2L PE=1 SV=2	1	1	2	0.688
	Q15942	ZYX_HUMAN Zyxin OS=Homo sapiens GN=ZYX PE=1 SV=1	1	1	11	0.682
	Q8IWG1	WDR63_HUMAN WD repeat_containing protein 63 OS=Homo sapiens GN=WDR63 PE=2 SV=1	1	1	3	0.674
	Q9UK76	HN1_HUMAN Hematological and neurological expressed 1 protein OS=Homo sapiens GN=HN1 PE=1 SV=3	1	1	19	0.671
	Q0VF49	K2012_HUMAN Uncharacterized protein KIAA2012 OS=Homo sapiens GN=KIAA2012 PE=2 SV=1	1	1	4	0.671
	P51812	KS6A3_HUMAN Ribosomal protein S6 kinase alpha_3 OS=Homo sapiens GN=RPS6KA3 PE=1 SV=1	1	1	2	0.67
	Q9UK32	KS6A6_HUMAN Ribosomal protein S6 kinase alpha_6 OS=Homo sapiens GN=RPS6KA6 PE=1 SV=1	1	1	2	0.67
	Q96M86	DNHD1_HUMAN Dynein heavy chain domain_containing protein 1 OS=Homo sapiens GN=DNHD1 PE=1 SV=2	1	1	9	0.665
	O95294	RASL1_HUMAN RasGAP_activating_like protein 1 OS=Homo sapiens GN=RASAL1 PE=1 SV=3	1	1	5	0.663
	Q9BRL6	SRSF8_HUMAN Serine/arginine_rich splicing factor 8 OS=Homo sapiens GN=SRSF8 PE=1 SV=1	1	1	11	0.662
	P61081	UBC12_HUMAN NEDD8_conjugating enzyme Ubc12 OS=Homo sapiens GN=UBE2M PE=1 SV=1	1	1	3	0.661
	Q9NQS7	INCE_HUMAN Inner centromere protein OS=Homo sapiens GN=INCENP PE=1 SV=3	1	1	3	0.658
	Q99678	GPR20_HUMAN G_protein coupled receptor 20 OS=Homo sapiens GN=GPR20 PE=1 SV=2	1	2	7	0.657
	P55201	BRPF1_HUMAN Peregrin OS=Homo sapiens GN=BRPF1 PE=1 SV=2	1	1	5	0.654
	O15116	LSM1_HUMAN U6 snRNA_associated Sm_like protein LSm1 OS=Homo sapiens GN=LSM1 PE=1 SV=1	1	2	9	0.65
	O15069	NACAD_HUMAN NAC_alpha domain_containing protein 1 OS=Homo sapiens GN=NACAD PE=2 SV=3	1	1	24	0.647
	Q5SQI0	ATAT_HUMAN Alpha_tubulin N_acetyltransferase OS=Homo sapiens GN=ATAT1 PE=1 SV=1	1	1	2	0.647
	P49023	PAXI_HUMAN Paxillin OS=Homo sapiens GN=PXN PE=1 SV=3	1	2	18	0.646
	P37108	SRP14_HUMAN Signal recognition particle 14 kDa protein OS=Homo sapiens GN=SRP14 PE=1 SV=2	1	2	10	0.646
	Q14202	ZMYM3_HUMAN Zinc finger MYM_type protein 3 OS=Homo sapiens GN=ZMYM3 PE=1 SV=2	1	2	5	0.646
	O14639	ABLM1_HUMAN Actin_binding LIM protein 1 OS=Homo sapiens GN=ABLIM1 PE=1 SV=3	1	1	10	0.643
	Q5TCY1	TTBK1_HUMAN Tau_tubulin kinase 1 OS=Homo sapiens GN=TTBK1 PE=1 SV=2	1	1	2	0.643
	Q4G0J3	LARP7_HUMAN La_related protein 7 OS=Homo sapiens GN=LARP7 PE=1 SV=1	1	1	6	0.642
	P52789	HXK2_HUMAN Hexokinase_2 OS=Homo sapiens GN=HK2 PE=1 SV=2	1	1	2	0.641
	Q9GZZ9	UBA5_HUMAN Ubiquitin_like modifier_activating enzyme 5 OS=Homo sapiens GN=UBA5 PE=1 SV=1	1	1	5	0.637
	P31040	DHSA_HUMAN Succinate dehydrogenase [ubiquinone] flavoprotein subunit_ mitochondrial OS=Homo sapiens GN=SDHA PE=1 SV=2	1	1	3	0.637
	P54707	AT12A_HUMAN Potassium_transporting ATPase alpha chain 2 OS=Homo sapiens GN=ATP12A PE=2 SV=3	1	1	11	0.63
	Q8TEQ0	SNX29_HUMAN Sorting nexin_29 OS=Homo sapiens GN=SNX29 PE=1 SV=3	1	2	10	0.629
	Q9H094	NBPF3_HUMAN Neuroblastoma breakpoint family member 3 OS=Homo sapiens GN=NBPF3 PE=2 SV=1	1	1	3	0.629
	O75570	RF1M_HUMAN Peptide chain release factor 1_ mitochondrial OS=Homo sapiens GN=MTRF1 PE=1 SV=2	1	1	2	0.629
	P17066	HSP76_HUMAN Heat shock 70 kDa protein 6 OS=Homo sapiens GN=HSPA6 PE=1 SV=2	1	1	7	0.628
	P48741	HSP77_HUMAN Putative heat shock 70 kDa protein 7 OS=Homo sapiens GN=HSPA7 PE=5 SV=2	1	1	7	0.628
	Q8NC96	NECP1_HUMAN Adaptin ear_binding coat_associated protein 1 OS=Homo sapiens GN=NECAP1 PE=1 SV=2	1	1	2	0.628
	P08218	CEL2B_HUMAN Chymotrypsin_like elastase family member 2B OS=Homo sapiens GN=CELA2B PE=2 SV=2	1	1	3	0.622
	P05386	RLA1_HUMAN 60S acidic ribosomal protein P1 OS=Homo sapiens GN=RPLP1 PE=1 SV=1	1	4	38	0.613
	Q1MX18	INSC_HUMAN Protein inscuteable homolog OS=Homo sapiens GN=INSC PE=1 SV=1	1	2	27	0.608
	Q8N6W0	CELF5_HUMAN CUGBP Elav_like family member 5 OS=Homo sapiens GN=CELF5 PE=1 SV=1	1	2	11	0.608
	P28070	PSB4_HUMAN Proteasome subunit beta type_4 OS=Homo sapiens GN=PSMB4 PE=1 SV=4	1	1	5	0.603
	O00299	CLIC1_HUMAN Chloride intracellular channel protein 1 OS=Homo sapiens GN=CLIC1 PE=1 SV=4	1	1	30	0.6
	Q9NPZ5	B3GA2_HUMAN Galactosylgalactosylxylosylprotein 3_beta_glucuronosyltransferase 2 OS=Homo sapiens GN=B3GAT2 PE=1 SV=2	1	1	7	0.593
	Q9NSC7	SIA7A_HUMAN Alpha_N_acetylgalactosaminide alpha_2_6_sialyltransferase 1 OS=Homo sapiens GN=ST6GALNAC1 PE=1 SV=1	1	1	12	0.583
	P31321	KAP1_HUMAN cAMP_dependent protein kinase type I_beta regulatory subunit OS=Homo sapiens GN=PRKAR1B PE=1 SV=4	1	1	2	0.583
	Q9NRC8	SIR7_HUMAN NAD_dependent protein deacetylase sirtuin_7 OS=Homo sapiens GN=SIRT7 PE=1 SV=1	1	1	2	0.58
	Q13131	AAPK1_HUMAN 5__AMP_activated protein kinase catalytic subunit alpha_1 OS=Homo sapiens GN=PRKAA1 PE=1 SV=4	1	1	6	0.577
	Q6UXH9	PAMR1_HUMAN Inactive serine protease PAMR1 OS=Homo sapiens GN=PAMR1 PE=1 SV=1	1	1	10	0.574
	Q8TEA1	NSUN6_HUMAN Putative methyltransferase NSUN6 OS=Homo sapiens GN=NSUN6 PE=1 SV=1	1	1	2	0.565
	O75608	LYPA1_HUMAN Acyl_protein thioesterase 1 OS=Homo sapiens GN=LYPLA1 PE=1 SV=1	1	1	5	0.558
	Q9BV73	CP250_HUMAN Centrosome_associated protein CEP250 OS=Homo sapiens GN=CEP250 PE=1 SV=2	1	1	3	0.54
	Q12929	EPS8_HUMAN Epidermal growth factor receptor kinase substrate 8 OS=Homo sapiens GN=EPS8 PE=1 SV=1	1	1	2	0.54
	Q96QK1	VPS35_HUMAN Vacuolar protein sorting_associated protein 35 OS=Homo sapiens GN=VPS35 PE=1 SV=2	1	1	3	0.535
	Q5DJT8	CT452_HUMAN Cancer/testis antigen family 45 member A2 OS=Homo sapiens GN=CT45A2 PE=2 SV=2	1	1	3	0.534
	Q5HYN5	CT451_HUMAN Cancer/testis antigen family 45 member A1 OS=Homo sapiens GN=CT45A1 PE=2 SV=1	1	1	3	0.534
	Q6NSH3	CT455_HUMAN Cancer/testis antigen family 45 member A5 OS=Homo sapiens GN=CT45A5 PE=2 SV=1	1	1	3	0.534
	Q8N7B7	CT454_HUMAN Cancer/testis antigen family 45 member A4/A6 OS=Homo sapiens GN=CT45A4 PE=2 SV=1	1	1	3	0.534
	Q8NHU0	CT453_HUMAN Cancer/testis antigen family 45 member A3 OS=Homo sapiens GN=CT45A3 PE=2 SV=1	1	1	3	0.534
	Q9GZU5	NYX_HUMAN Nyctalopin OS=Homo sapiens GN=NYX PE=1 SV=1	1	1	2	0.532
	Q9UHK0	NUFP1_HUMAN Nuclear fragile X mental retardation_interacting protein 1 OS=Homo sapiens GN=NUFIP1 PE=1 SV=2	1	1	2	0.532
	Q9UGU0	TCF20_HUMAN Transcription factor 20 OS=Homo sapiens GN=TCF20 PE=1 SV=3	1	2	2	0.528
	Q7Z570	Z804A_HUMAN Zinc finger protein 804A OS=Homo sapiens GN=ZNF804A PE=1 SV=3	1	1	4	0.525
	A8K855	EFCB7_HUMAN EF_hand calcium_binding domain_containing protein 7 OS=Homo sapiens GN=EFCAB7 PE=2 SV=1	1	1	3	0.517
	Q05397	FAK1_HUMAN Focal adhesion kinase 1 OS=Homo sapiens GN=PTK2 PE=1 SV=2	1	1	6	0.514
	P36551	HEM6_HUMAN Coproporphyrinogen_III oxidase_ mitochondrial OS=Homo sapiens GN=CPOX PE=1 SV=3	1	1	4	0.514
	O60241	BAI2_HUMAN Brain_specific angiogenesis inhibitor 2 OS=Homo sapiens GN=BAI2 PE=2 SV=2	1	2	2	0.514
	Q9NS93	TM7S3_HUMAN Transmembrane 7 superfamily member 3 OS=Homo sapiens GN=TM7SF3 PE=2 SV=1	1	1	2	0.514
	Q9NQA5	TRPV5_HUMAN Transient receptor potential cation channel subfamily V member 5 OS=Homo sapiens GN=TRPV5 PE=1 SV=2	1	1	8	0.506
	Q9NPH3	IL1AP_HUMAN Interleukin_1 receptor accessory protein OS=Homo sapiens GN=IL1RAP PE=1 SV=2	1	1	4	0.5
	Q00266	METK1_HUMAN S_adenosylmethionine synthase isoform type_1 OS=Homo sapiens GN=MAT1A PE=1 SV=2	1	2	7	0.496
	P07203	GPX1_HUMAN Glutathione peroxidase 1 OS=Homo sapiens GN=GPX1 PE=1 SV=4	1	1	10	0.49
	Q9NZ08	ERAP1_HUMAN Endoplasmic reticulum aminopeptidase 1 OS=Homo sapiens GN=ERAP1 PE=1 SV=3	1	1	2	0.481
	P27216	ANX13_HUMAN Annexin A13 OS=Homo sapiens GN=ANXA13 PE=1 SV=3	1	1	4	0.478
	P49748	ACADV_HUMAN Very long_chain specific acyl_CoA dehydrogenase_ mitochondrial OS=Homo sapiens GN=ACADVL PE=1 SV=1	1	1	10	0.474
	Q96MG7	MAGG1_HUMAN Melanoma_associated antigen G1 OS=Homo sapiens GN=NDNL2 PE=1 SV=1	1	2	3	0.457
	Q14254	FLOT2_HUMAN Flotillin_2 OS=Homo sapiens GN=FLOT2 PE=1 SV=2	1	1	12	0.452
	Q9Y2J4	AMOL2_HUMAN Angiomotin_like protein 2 OS=Homo sapiens GN=AMOTL2 PE=1 SV=3	1	1	3	0.446
	Q8IZF2	GP116_HUMAN Probable G_protein coupled receptor 116 OS=Homo sapiens GN=GPR116 PE=1 SV=3	1	1	2	0.446
	Q9BZV1	UBXN6_HUMAN UBX domain_containing protein 6 OS=Homo sapiens GN=UBXN6 PE=1 SV=1	1	1	2	0.446
	Q460N3	PAR15_HUMAN Poly [ADP_ribose] polymerase 15 OS=Homo sapiens GN=PARP15 PE=1 SV=1	1	1	3	0.437
	O00159	MYO1C_HUMAN Unconventional myosin_Ic OS=Homo sapiens GN=MYO1C PE=1 SV=4	1	1	5	0.432
	P12277	KCRB_HUMAN Creatine kinase B_type OS=Homo sapiens GN=CKB PE=1 SV=1	1	1	5	0.423
	O14818	PSA7_HUMAN Proteasome subunit alpha type_7 OS=Homo sapiens GN=PSMA7 PE=1 SV=1	1	3	8	0.406
	Q8IVB5	LIX1L_HUMAN LIX1_like protein OS=Homo sapiens GN=LIX1L PE=2 SV=1	1	1	4	0.38
	P31350	RIR2_HUMAN Ribonucleoside_diphosphate reductase subunit M2 OS=Homo sapiens GN=RRM2 PE=1 SV=1	1	1	4	0.371
	Q8NFC6	BD1L1_HUMAN Biorientation of chromosomes in cell division protein 1_like 1 OS=Homo sapiens GN=BOD1L1 PE=1 SV=2	1	1	2	0.371
	P23458	JAK1_HUMAN Tyrosine_protein kinase JAK1 OS=Homo sapiens GN=JAK1 PE=1 SV=2	1	1	4	0.344
	Q99814	EPAS1_HUMAN Endothelial PAS domain_containing protein 1 OS=Homo sapiens GN=EPAS1 PE=1 SV=3	1	2	21	0.325
	Q9Y279	VSIG4_HUMAN V_set and immunoglobulin domain_containing protein 4 OS=Homo sapiens GN=VSIG4 PE=1 SV=1	1	2	2	0.321
	Q9NQX6	ZN331_HUMAN Zinc finger protein 331 OS=Homo sapiens GN=ZNF331 PE=2 SV=1	1	1	2	0.317
	Q8N8S7	ENAH_HUMAN Protein enabled homolog OS=Homo sapiens GN=ENAH PE=1 SV=2	1	1	5	0.295
	Q9ULN7	PNML2_HUMAN PNMA_like protein 2 OS=Homo sapiens GN=PNMAL2 PE=2 SV=2	1	2	2	0.295
	P0C875	U638B_HUMAN UPF0638 protein B OS=Homo sapiens PE=2 SV=1	1	2	2	0.29
	Q14BN4	SLMAP_HUMAN Sarcolemmal membrane_associated protein OS=Homo sapiens GN=SLMAP PE=1 SV=1	1	1	2	0.261
	Q8TBN0	R3GEF_HUMAN Guanine nucleotide exchange factor for Rab_3A OS=Homo sapiens GN=RAB3IL1 PE=1 SV=1	1	2	7	0.26
	Q15031	SYLM_HUMAN Probable leucine__tRNA ligase_ mitochondrial OS=Homo sapiens GN=LARS2 PE=1 SV=2	1	1	4	0.251
	Q9UKT8	FBXW2_HUMAN F_box/WD repeat_containing protein 2 OS=Homo sapiens GN=FBXW2 PE=1 SV=2	1	1	3	0.243
	Q15349	KS6A2_HUMAN Ribosomal protein S6 kinase alpha_2 OS=Homo sapiens GN=RPS6KA2 PE=1 SV=2	1	1	2	0.231
	Q8N239	KLH34_HUMAN Kelch_like protein 34 OS=Homo sapiens GN=KLHL34 PE=2 SV=1	1	1	2	0.227
	P11766	ADHX_HUMAN Alcohol dehydrogenase class_3 OS=Homo sapiens GN=ADH5 PE=1 SV=4	1	1	6	0.215
	Q9Y388	RBMX2_HUMAN RNA_binding motif protein_ X_linked 2 OS=Homo sapiens GN=RBMX2 PE=1 SV=2	1	1	3	0.201
	O15265	ATX7_HUMAN Ataxin_7 OS=Homo sapiens GN=ATXN7 PE=1 SV=1	1	1	3	0.183
	P28072	PSB6_HUMAN Proteasome subunit beta type_6 OS=Homo sapiens GN=PSMB6 PE=1 SV=4	1	1	7	0.18
	Q9H7Z3	CN102_HUMAN UPF0614 protein C14orf102 OS=Homo sapiens GN=C14orf102 PE=1 SV=3	1	1	11	0.173
	P57678	GEMI4_HUMAN Gem_associated protein 4 OS=Homo sapiens GN=GEMIN4 PE=1 SV=2	1	2	17	0.137
	Q2M3G0	ABCB5_HUMAN ATP_binding cassette sub_family B member 5 OS=Homo sapiens GN=ABCB5 PE=1 SV=3	1	2	2	0.131
	Q86Y91	KI18B_HUMAN Kinesin_like protein KIF18B OS=Homo sapiens GN=KIF18B PE=1 SV=3	1	1	2	0.125
	Q14003	KCNC3_HUMAN Potassium voltage_gated channel subfamily C member 3 OS=Homo sapiens GN=KCNC3 PE=1 SV=3	1	3	13	0.101
	P20618	PSB1_HUMAN Proteasome subunit beta type_1 OS=Homo sapiens GN=PSMB1 PE=1 SV=2	1	2	2	0.089
	Q9BYK8	PR285_HUMAN Peroxisomal proliferator_activated receptor A_interacting complex 285 kDa protein OS=Homo sapiens GN=PRIC285 PE=1 SV=6	1	1	3	0.037
	Q86T90	K1328_HUMAN Uncharacterized protein KIAA1328 OS=Homo sapiens GN=KIAA1328 PE=1 SV=2	1	1	2	0.037

## Sheet: Sheet2
	Protein ID	Description	Peptides	Frames	Hits	Normalized Ratio		Ratio	<0.5	.5-.67	.67-.9	0.9-1.2	1.2-1.6	1.6-2	>2
	SP://Q15149	PLEC_HUMAN Plectin OS=Homo sapiens GN=PLEC PE=1 SV=3	27	34	246	1.11		1455	58	79	270	657	273	70	51
	SP://P49327	FAS_HUMAN Fatty acid synthase OS=Homo sapiens GN=FASN PE=1 SV=3	21	29	287	0.988		Peptides	1	2	3	4	5	6	7-27
	SP://P08238	HS90B_HUMAN Heat shock protein HSP 90_beta OS=Homo sapiens GN=HSP90AB1 PE=1 SV=4	20	50	973	0.983			857	294	111	71	41	17	64
	SP://P07900	HS90A_HUMAN Heat shock protein HSP 90_alpha OS=Homo sapiens GN=HSP90AA1 PE=1 SV=5	20	52	964	0.95
	SP://Q00610	CLH1_HUMAN Clathrin heavy chain 1 OS=Homo sapiens GN=CLTC PE=1 SV=5	18	28	274	1.082
	SP://P06733	ENOA_HUMAN Alpha_enolase OS=Homo sapiens GN=ENO1 PE=1 SV=2	17	28	473	0.858
	SP://P21333	FLNA_HUMAN Filamin_A OS=Homo sapiens GN=FLNA PE=1 SV=4	15	29	336	0.926
	SP://P02545	LMNA_HUMAN Prelamin_A/C OS=Homo sapiens GN=LMNA PE=1 SV=1	14	22	275	1.616
	SP://P13639	EF2_HUMAN Elongation factor 2 OS=Homo sapiens GN=EEF2 PE=1 SV=4	14	19	269	0.953
	SP://P14618	KPYM_HUMAN Pyruvate kinase isozymes M1/M2 OS=Homo sapiens GN=PKM2 PE=1 SV=4	13	21	236	1.424
	SP://P35579	MYH9_HUMAN Myosin_9 OS=Homo sapiens GN=MYH9 PE=1 SV=4	13	16	117	1.27
	SP://P08670	VIME_HUMAN Vimentin OS=Homo sapiens GN=VIM PE=1 SV=4	13	25	453	1.163
	SP://Q92598	HS105_HUMAN Heat shock protein 105 kDa OS=Homo sapiens GN=HSPH1 PE=1 SV=1	13	22	247	1.122
	SP://P00558	PGK1_HUMAN Phosphoglycerate kinase 1 OS=Homo sapiens GN=PGK1 PE=1 SV=3	13	21	273	0.431
	SP://O75369	FLNB_HUMAN Filamin_B OS=Homo sapiens GN=FLNB PE=1 SV=2	12	15	147	0.987
	SP://P04406	G3P_HUMAN Glyceraldehyde_3_phosphate dehydrogenase OS=Homo sapiens GN=GAPDH PE=1 SV=3	12	34	512	0.639
	SP://P29401	TKT_HUMAN Transketolase OS=Homo sapiens GN=TKT PE=1 SV=3	12	22	179	0.238
	SP://P48643	TCPE_HUMAN T_complex protein 1 subunit epsilon OS=Homo sapiens GN=CCT5 PE=1 SV=1	11	13	147	1.224
	SP://P34932	HSP74_HUMAN Heat shock 70 kDa protein 4 OS=Homo sapiens GN=HSPA4 PE=1 SV=4	11	17	183	1.162
	SP://P23396	RS3_HUMAN 40S ribosomal protein S3 OS=Homo sapiens GN=RPS3 PE=1 SV=2	11	13	173	1.036
	SP://Q14974	IMB1_HUMAN Importin subunit beta_1 OS=Homo sapiens GN=KPNB1 PE=1 SV=2	11	12	207	0.789
	SP://P22314	UBA1_HUMAN Ubiquitin_like modifier_activating enzyme 1 OS=Homo sapiens GN=UBA1 PE=1 SV=3	10	19	214	1.083
	SP://P11940	PABP1_HUMAN Polyadenylate_binding protein 1 OS=Homo sapiens GN=PABPC1 PE=1 SV=2	10	13	81	0.965
	SP://P60842	IF4A1_HUMAN Eukaryotic initiation factor 4A_I OS=Homo sapiens GN=EIF4A1 PE=1 SV=1	10	18	228	0.938
	SP://O43707	ACTN4_HUMAN Alpha_actinin_4 OS=Homo sapiens GN=ACTN4 PE=1 SV=2	10	14	135	0.861
	SP://P78371	TCPB_HUMAN T_complex protein 1 subunit beta OS=Homo sapiens GN=CCT2 PE=1 SV=4	9	11	161	1.43
	SP://P19338	NUCL_HUMAN Nucleolin OS=Homo sapiens GN=NCL PE=1 SV=3	9	13	163	1.287
	SP://Q12906	ILF3_HUMAN Interleukin enhancer_binding factor 3 OS=Homo sapiens GN=ILF3 PE=1 SV=3	9	12	87	1.197
	SP://P12956	XRCC6_HUMAN X_ray repair cross_complementing protein 6 OS=Homo sapiens GN=XRCC6 PE=1 SV=2	9	16	142	1.115
	SP://Q8WZ42	TITIN_HUMAN Titin OS=Homo sapiens GN=TTN PE=1 SV=4	9	8	73	1.071
	SP://P50395	GDIB_HUMAN Rab GDP dissociation inhibitor beta OS=Homo sapiens GN=GDI2 PE=1 SV=2	9	10	89	0.945
	SP://P55060	XPO2_HUMAN Exportin_2 OS=Homo sapiens GN=CSE1L PE=1 SV=3	9	11	117	0.893
	SP://P11142	HSP7C_HUMAN Heat shock cognate 71 kDa protein OS=Homo sapiens GN=HSPA8 PE=1 SV=1	9	12	80	0.774
	SP://P60174	TPIS_HUMAN Triosephosphate isomerase OS=Homo sapiens GN=TPI1 PE=1 SV=3	9	18	174	0.613
	SP://P22626	ROA2_HUMAN Heterogeneous nuclear ribonucleoproteins A2/B1 OS=Homo sapiens GN=HNRNPA2B1 PE=1 SV=2	8	13	147	1.393
	SP://P68371	TBB4B_HUMAN Tubulin beta_4B chain OS=Homo sapiens GN=TUBB4B PE=1 SV=1	8	29	468	1.255
	SP://P07437	TBB5_HUMAN Tubulin beta chain OS=Homo sapiens GN=TUBB PE=1 SV=2	8	30	487	1.205
	SP://P11216	PYGB_HUMAN Glycogen phosphorylase_ brain form OS=Homo sapiens GN=PYGB PE=1 SV=5	8	12	110	1.158
	SP://P62937	PPIA_HUMAN Peptidyl_prolyl cis_trans isomerase A OS=Homo sapiens GN=PPIA PE=1 SV=2	8	17	227	1.144
	SP://P50990	TCPQ_HUMAN T_complex protein 1 subunit theta OS=Homo sapiens GN=CCT8 PE=1 SV=4	8	9	137	1.098
	SP://Q15029	U5S1_HUMAN 116 kDa U5 small nuclear ribonucleoprotein component OS=Homo sapiens GN=EFTUD2 PE=1 SV=1	8	10	48	0.999
	SP://Q58FF7	H90B3_HUMAN Putative heat shock protein HSP 90_beta_3 OS=Homo sapiens GN=HSP90AB3P PE=5 SV=1	8	24	401	0.966
	SP://P12268	IMDH2_HUMAN Inosine_5__monophosphate dehydrogenase 2 OS=Homo sapiens GN=IMPDH2 PE=1 SV=2	8	13	113	0.841
	SP://O00410	IPO5_HUMAN Importin_5 OS=Homo sapiens GN=IPO5 PE=1 SV=4	8	10	79	0.827
	SP://Q86VP6	CAND1_HUMAN Cullin_associated NEDD8_dissociated protein 1 OS=Homo sapiens GN=CAND1 PE=1 SV=2	8	11	100	0.821
	SP://P07195	LDHB_HUMAN L_lactate dehydrogenase B chain OS=Homo sapiens GN=LDHB PE=1 SV=2	8	12	152	0.321
	SP://Q13509	TBB3_HUMAN Tubulin beta_3 chain OS=Homo sapiens GN=TUBB3 PE=1 SV=2	7	21	301	1.333
	SP://P68104	EF1A1_HUMAN Elongation factor 1_alpha 1 OS=Homo sapiens GN=EEF1A1 PE=1 SV=1	7	30	460	1.275
	SP://Q5VTE0	EF1A3_HUMAN Putative elongation factor 1_alpha_like 3 OS=Homo sapiens GN=EEF1A1P5 PE=5 SV=1	7	30	460	1.275
	SP://Q13885	TBB2A_HUMAN Tubulin beta_2A chain OS=Homo sapiens GN=TUBB2A PE=1 SV=1	7	25	369	1.275
	SP://Q9BVA1	TBB2B_HUMAN Tubulin beta_2B chain OS=Homo sapiens GN=TUBB2B PE=1 SV=1	7	25	369	1.275
	SP://Q06830	PRDX1_HUMAN Peroxiredoxin_1 OS=Homo sapiens GN=PRDX1 PE=1 SV=1	7	11	117	1.12
	SP://P05388	RLA0_HUMAN 60S acidic ribosomal protein P0 OS=Homo sapiens GN=RPLP0 PE=1 SV=1	7	9	62	1.104
	SP://P06753	TPM3_HUMAN Tropomyosin alpha_3 chain OS=Homo sapiens GN=TPM3 PE=1 SV=1	7	10	106	1.06
	SP://P17987	TCPA_HUMAN T_complex protein 1 subunit alpha OS=Homo sapiens GN=TCP1 PE=1 SV=1	7	9	103	1.056
	SP://P68363	TBA1B_HUMAN Tubulin alpha_1B chain OS=Homo sapiens GN=TUBA1B PE=1 SV=1	7	11	199	1.03
	SP://Q9BQE3	TBA1C_HUMAN Tubulin alpha_1C chain OS=Homo sapiens GN=TUBA1C PE=1 SV=1	7	11	199	1.03
	SP://O00231	PSD11_HUMAN 26S proteasome non_ATPase regulatory subunit 11 OS=Homo sapiens GN=PSMD11 PE=1 SV=3	7	10	59	1.017
	SP://P54136	SYRC_HUMAN Arginine__tRNA ligase_ cytoplasmic OS=Homo sapiens GN=RARS PE=1 SV=2	7	10	84	1.008
	SP://Q58FF8	H90B2_HUMAN Putative heat shock protein HSP 90_beta 2 OS=Homo sapiens GN=HSP90AB2P PE=1 SV=2	7	17	320	0.901
	SP://Q9Y490	TLN1_HUMAN Talin_1 OS=Homo sapiens GN=TLN1 PE=1 SV=3	7	9	65	0.883
	SP://P47895	AL1A3_HUMAN Aldehyde dehydrogenase family 1 member A3 OS=Homo sapiens GN=ALDH1A3 PE=1 SV=2	7	9	80	0.763
	SP://P08758	ANXA5_HUMAN Annexin A5 OS=Homo sapiens GN=ANXA5 PE=1 SV=2	7	14	134	0.549
	SP://P00338	LDHA_HUMAN L_lactate dehydrogenase A chain OS=Homo sapiens GN=LDHA PE=1 SV=2	7	11	68	0.407
	SP://Q05639	EF1A2_HUMAN Elongation factor 1_alpha 2 OS=Homo sapiens GN=EEF1A2 PE=1 SV=1	6	28	457	1.284
	SP://P04350	TBB4A_HUMAN Tubulin beta_4A chain OS=Homo sapiens GN=TUBB4A PE=1 SV=2	6	23	375	1.25
	SP://P17844	DDX5_HUMAN Probable ATP_dependent RNA helicase DDX5 OS=Homo sapiens GN=DDX5 PE=1 SV=1	6	7	64	1.211
	SP://P07814	SYEP_HUMAN Bifunctional glutamate/proline__tRNA ligase OS=Homo sapiens GN=EPRS PE=1 SV=5	6	8	62	1.162
	SP://P04075	ALDOA_HUMAN Fructose_bisphosphate aldolase A OS=Homo sapiens GN=ALDOA PE=1 SV=2	6	9	130	1.154
	SP://P60709	ACTB_HUMAN Actin_ cytoplasmic 1 OS=Homo sapiens GN=ACTB PE=1 SV=1	6	21	374	1.142
	SP://P63261	ACTG_HUMAN Actin_ cytoplasmic 2 OS=Homo sapiens GN=ACTG1 PE=1 SV=1	6	21	374	1.142
	SP://Q9Y230	RUVB2_HUMAN RuvB_like 2 OS=Homo sapiens GN=RUVBL2 PE=1 SV=3	6	6	61	1.088
	SP://Q71U36	TBA1A_HUMAN Tubulin alpha_1A chain OS=Homo sapiens GN=TUBA1A PE=1 SV=1	6	10	166	1.051
	SP://Q9H361	PABP3_HUMAN Polyadenylate_binding protein 3 OS=Homo sapiens GN=PABPC3 PE=1 SV=2	6	7	49	1.05
	SP://Q9Y3F4	STRAP_HUMAN Serine_threonine kinase receptor_associated protein OS=Homo sapiens GN=STRAP PE=1 SV=1	6	9	72	1.014
	SP://P55072	TERA_HUMAN Transitional endoplasmic reticulum ATPase OS=Homo sapiens GN=VCP PE=1 SV=4	6	8	108	1.009
	SP://P12081	SYHC_HUMAN Histidine__tRNA ligase_ cytoplasmic OS=Homo sapiens GN=HARS PE=1 SV=2	6	8	47	1.002
	SP://P50991	TCPD_HUMAN T_complex protein 1 subunit delta OS=Homo sapiens GN=CCT4 PE=1 SV=4	6	7	119	0.912
	SP://P12814	ACTN1_HUMAN Alpha_actinin_1 OS=Homo sapiens GN=ACTN1 PE=1 SV=2	6	7	52	0.814
	SP://Q13813	SPTA2_HUMAN Spectrin alpha chain_ brain OS=Homo sapiens GN=SPTAN1 PE=1 SV=3	6	6	27	0.736
	SP://P37802	TAGL2_HUMAN Transgelin_2 OS=Homo sapiens GN=TAGLN2 PE=1 SV=3	6	9	177	0.633
	SP://Q8NF91	SYNE1_HUMAN Nesprin_1 OS=Homo sapiens GN=SYNE1 PE=1 SV=3	5	4	11	1.838
	SP://Q00839	HNRPU_HUMAN Heterogeneous nuclear ribonucleoprotein U OS=Homo sapiens GN=HNRNPU PE=1 SV=6	5	8	84	1.389
	SP://P09651	ROA1_HUMAN Heterogeneous nuclear ribonucleoprotein A1 OS=Homo sapiens GN=HNRNPA1 PE=1 SV=5	5	11	135	1.385
	SP://Q32P51	RA1L2_HUMAN Heterogeneous nuclear ribonucleoprotein A1_like 2 OS=Homo sapiens GN=HNRNPA1L2 PE=2 SV=2	5	11	135	1.385
	SP://P12004	PCNA_HUMAN Proliferating cell nuclear antigen OS=Homo sapiens GN=PCNA PE=1 SV=1	5	6	53	1.353
	SP://Q08211	DHX9_HUMAN ATP_dependent RNA helicase A OS=Homo sapiens GN=DHX9 PE=1 SV=4	5	8	47	1.325
	SP://P53675	CLH2_HUMAN Clathrin heavy chain 2 OS=Homo sapiens GN=CLTCL1 PE=1 SV=2	5	6	67	1.261
	SP://O43175	SERA_HUMAN D_3_phosphoglycerate dehydrogenase OS=Homo sapiens GN=PHGDH PE=1 SV=4	5	5	49	1.215
	SP://P13010	XRCC5_HUMAN X_ray repair cross_complementing protein 5 OS=Homo sapiens GN=XRCC5 PE=1 SV=3	5	8	48	1.21
	SP://Q9BXJ9	NAA15_HUMAN N_alpha_acetyltransferase 15_ NatA auxiliary subunit OS=Homo sapiens GN=NAA15 PE=1 SV=1	5	6	18	1.208
	SP://P09429	HMGB1_HUMAN High mobility group protein B1 OS=Homo sapiens GN=HMGB1 PE=1 SV=3	5	5	38	1.181
	SP://P53396	ACLY_HUMAN ATP_citrate synthase OS=Homo sapiens GN=ACLY PE=1 SV=3	5	5	73	1.159
	SP://P26038	MOES_HUMAN Moesin OS=Homo sapiens GN=MSN PE=1 SV=3	5	6	24	1.158
	SP://P49915	GUAA_HUMAN GMP synthase [glutamine_hydrolyzing] OS=Homo sapiens GN=GMPS PE=1 SV=1	5	9	60	1.157
	SP://P14868	SYDC_HUMAN Aspartate__tRNA ligase_ cytoplasmic OS=Homo sapiens GN=DARS PE=1 SV=2	5	6	52	1.153
	SP://P62701	RS4X_HUMAN 40S ribosomal protein S4_ X isoform OS=Homo sapiens GN=RPS4X PE=1 SV=2	5	7	70	1.123
	SP://P38919	IF4A3_HUMAN Eukaryotic initiation factor 4A_III OS=Homo sapiens GN=EIF4A3 PE=1 SV=4	5	6	46	1.108
	SP://Q8NHW5	RLA0L_HUMAN 60S acidic ribosomal protein P0_like OS=Homo sapiens GN=RPLP0P6 PE=5 SV=1	5	6	47	1.103
	SP://O15523	DDX3Y_HUMAN ATP_dependent RNA helicase DDX3Y OS=Homo sapiens GN=DDX3Y PE=1 SV=2	5	5	63	1.086
	SP://O60506	HNRPQ_HUMAN Heterogeneous nuclear ribonucleoprotein Q OS=Homo sapiens GN=SYNCRIP PE=1 SV=2	5	6	68	1.075
	SP://P22234	PUR6_HUMAN Multifunctional protein ADE2 OS=Homo sapiens GN=PAICS PE=1 SV=3	5	7	69	1.072
	SP://Q14152	EIF3A_HUMAN Eukaryotic translation initiation factor 3 subunit A OS=Homo sapiens GN=EIF3A PE=1 SV=1	5	6	47	1.055
	SP://O00571	DDX3X_HUMAN ATP_dependent RNA helicase DDX3X OS=Homo sapiens GN=DDX3X PE=1 SV=3	5	5	82	1.044
	SP://P48681	NEST_HUMAN Nestin OS=Homo sapiens GN=NES PE=1 SV=2	5	6	21	1.04
	SP://O95347	SMC2_HUMAN Structural maintenance of chromosomes protein 2 OS=Homo sapiens GN=SMC2 PE=1 SV=2	5	5	25	1.038
	SP://P40227	TCPZ_HUMAN T_complex protein 1 subunit zeta OS=Homo sapiens GN=CCT6A PE=1 SV=3	5	8	100	1.028
	SP://Q8WUM4	PDC6I_HUMAN Programmed cell death 6_interacting protein OS=Homo sapiens GN=PDCD6IP PE=1 SV=1	5	5	48	1.028
	SP://P31153	METK2_HUMAN S_adenosylmethionine synthase isoform type_2 OS=Homo sapiens GN=MAT2A PE=1 SV=1	5	10	108	1.021
	SP://P63244	GBLP_HUMAN Guanine nucleotide_binding protein subunit beta_2_like 1 OS=Homo sapiens GN=GNB2L1 PE=1 SV=3	5	9	101	1.017
	SP://P27708	PYR1_HUMAN CAD protein OS=Homo sapiens GN=CAD PE=1 SV=3	5	7	67	0.993
	SP://P62241	RS8_HUMAN 40S ribosomal protein S8 OS=Homo sapiens GN=RPS8 PE=1 SV=2	5	8	115	0.991
	SP://Q07020	RL18_HUMAN 60S ribosomal protein L18 OS=Homo sapiens GN=RPL18 PE=1 SV=2	5	7	103	0.985
	SP://P04083	ANXA1_HUMAN Annexin A1 OS=Homo sapiens GN=ANXA1 PE=1 SV=2	5	14	217	0.944
	SP://Q13263	TIF1B_HUMAN Transcription intermediary factor 1_beta OS=Homo sapiens GN=TRIM28 PE=1 SV=5	5	8	114	0.935
	SP://P31939	PUR9_HUMAN Bifunctional purine biosynthesis protein PURH OS=Homo sapiens GN=ATIC PE=1 SV=3	5	7	64	0.929
	SP://Q14240	IF4A2_HUMAN Eukaryotic initiation factor 4A_II OS=Homo sapiens GN=EIF4A2 PE=1 SV=2	5	8	121	0.875
	SP://P35998	PRS7_HUMAN 26S protease regulatory subunit 7 OS=Homo sapiens GN=PSMC2 PE=1 SV=3	5	5	45	0.84
	SP://Q13765	NACA_HUMAN Nascent polypeptide_associated complex subunit alpha OS=Homo sapiens GN=NACA PE=1 SV=1	5	9	161	0.835
	SP://P41250	SYG_HUMAN Glycine__tRNA ligase OS=Homo sapiens GN=GARS PE=1 SV=3	5	5	43	0.77
	SP://P62195	PRS8_HUMAN 26S protease regulatory subunit 8 OS=Homo sapiens GN=PSMC5 PE=1 SV=1	5	6	23	0.656
	SP://P62906	RL10A_HUMAN 60S ribosomal protein L10a OS=Homo sapiens GN=RPL10A PE=1 SV=2	5	10	80	0.455
	SP://P07910	HNRPC_HUMAN Heterogeneous nuclear ribonucleoproteins C1/C2 OS=Homo sapiens GN=HNRNPC PE=1 SV=4	4	5	47	2.377
	SP://Q99497	PARK7_HUMAN Protein DJ_1 OS=Homo sapiens GN=PARK7 PE=1 SV=2	4	4	29	1.897
	SP://P30101	PDIA3_HUMAN Protein disulfide_isomerase A3 OS=Homo sapiens GN=PDIA3 PE=1 SV=4	4	4	17	1.743
	SP://P61247	RS3A_HUMAN 40S ribosomal protein S3a OS=Homo sapiens GN=RPS3A PE=1 SV=2	4	4	31	1.727
	SP://P31943	HNRH1_HUMAN Heterogeneous nuclear ribonucleoprotein H OS=Homo sapiens GN=HNRNPH1 PE=1 SV=4	4	6	63	1.52
	SP://Q96JM2	ZN462_HUMAN Zinc finger protein 462 OS=Homo sapiens GN=ZNF462 PE=1 SV=3	4	6	15	1.46
	SP://P30050	RL12_HUMAN 60S ribosomal protein L12 OS=Homo sapiens GN=RPL12 PE=1 SV=1	4	6	79	1.422
	SP://P63104	1433Z_HUMAN 14_3_3 protein zeta/delta OS=Homo sapiens GN=YWHAZ PE=1 SV=1	4	6	111	1.407
	SP://P15880	RS2_HUMAN 40S ribosomal protein S2 OS=Homo sapiens GN=RPS2 PE=1 SV=2	4	4	49	1.334
	SP://P41252	SYIC_HUMAN Isoleucine__tRNA ligase_ cytoplasmic OS=Homo sapiens GN=IARS PE=1 SV=2	4	5	35	1.317
	SP://P11021	GRP78_HUMAN 78 kDa glucose_regulated protein OS=Homo sapiens GN=HSPA5 PE=1 SV=2	4	5	35	1.313
	SP://Q14204	DYHC1_HUMAN Cytoplasmic dynein 1 heavy chain 1 OS=Homo sapiens GN=DYNC1H1 PE=1 SV=5	4	4	16	1.305
	SP://Q13347	EIF3I_HUMAN Eukaryotic translation initiation factor 3 subunit I OS=Homo sapiens GN=EIF3I PE=1 SV=1	4	4	43	1.267
	SP://P67936	TPM4_HUMAN Tropomyosin alpha_4 chain OS=Homo sapiens GN=TPM4 PE=1 SV=3	4	9	74	1.248
	SP://P56192	SYMC_HUMAN Methionine__tRNA ligase_ cytoplasmic OS=Homo sapiens GN=MARS PE=1 SV=2	4	4	16	1.243
	SP://P30041	PRDX6_HUMAN Peroxiredoxin_6 OS=Homo sapiens GN=PRDX6 PE=1 SV=3	4	6	71	1.237
	SP://Q99873	ANM1_HUMAN Protein arginine N_methyltransferase 1 OS=Homo sapiens GN=PRMT1 PE=1 SV=2	4	6	59	1.213
	SP://P07951	TPM2_HUMAN Tropomyosin beta chain OS=Homo sapiens GN=TPM2 PE=1 SV=1	4	8	61	1.204
	SP://O00148	DX39A_HUMAN ATP_dependent RNA helicase DDX39A OS=Homo sapiens GN=DDX39A PE=1 SV=2	4	4	36	1.196
	SP://P62736	ACTA_HUMAN Actin_ aortic smooth muscle OS=Homo sapiens GN=ACTA2 PE=1 SV=1	4	14	239	1.181
	SP://P63267	ACTH_HUMAN Actin_ gamma_enteric smooth muscle OS=Homo sapiens GN=ACTG2 PE=1 SV=1	4	14	239	1.181
	SP://P68032	ACTC_HUMAN Actin_ alpha cardiac muscle 1 OS=Homo sapiens GN=ACTC1 PE=1 SV=1	4	14	239	1.181
	SP://P68133	ACTS_HUMAN Actin_ alpha skeletal muscle OS=Homo sapiens GN=ACTA1 PE=1 SV=1	4	14	239	1.181
	SP://P50502	F10A1_HUMAN Hsc70_interacting protein OS=Homo sapiens GN=ST13 PE=1 SV=2	4	6	54	1.179
	SP://P31150	GDIA_HUMAN Rab GDP dissociation inhibitor alpha OS=Homo sapiens GN=GDI1 PE=1 SV=2	4	4	26	1.167
	SP://P62851	RS25_HUMAN 40S ribosomal protein S25 OS=Homo sapiens GN=RPS25 PE=1 SV=1	4	8	43	1.162
	SP://P61289	PSME3_HUMAN Proteasome activator complex subunit 3 OS=Homo sapiens GN=PSME3 PE=1 SV=1	4	6	54	1.151
	SP://P62258	1433E_HUMAN 14_3_3 protein epsilon OS=Homo sapiens GN=YWHAE PE=1 SV=1	4	5	41	1.125
	SP://Q562R1	ACTBL_HUMAN Beta_actin_like protein 2 OS=Homo sapiens GN=ACTBL2 PE=1 SV=2	4	17	293	1.104
	SP://Q92841	DDX17_HUMAN Probable ATP_dependent RNA helicase DDX17 OS=Homo sapiens GN=DDX17 PE=1 SV=2	4	5	45	1.09
	SP://P53621	COPA_HUMAN Coatomer subunit alpha OS=Homo sapiens GN=COPA PE=1 SV=2	4	5	39	1.087
	SP://Q9Y262	EIF3L_HUMAN Eukaryotic translation initiation factor 3 subunit L OS=Homo sapiens GN=EIF3L PE=1 SV=1	4	4	38	1.075
	SP://Q13748	TBA3C_HUMAN Tubulin alpha_3C/D chain OS=Homo sapiens GN=TUBA3C PE=1 SV=3	4	8	124	1.068
	SP://Q6PEY2	TBA3E_HUMAN Tubulin alpha_3E chain OS=Homo sapiens GN=TUBA3E PE=1 SV=2	4	8	124	1.068
	SP://P68366	TBA4A_HUMAN Tubulin alpha_4A chain OS=Homo sapiens GN=TUBA4A PE=1 SV=1	4	8	147	1.067
	SP://Q9NY65	TBA8_HUMAN Tubulin alpha_8 chain OS=Homo sapiens GN=TUBA8 PE=1 SV=1	4	8	147	1.067
	SP://O43242	PSMD3_HUMAN 26S proteasome non_ATPase regulatory subunit 3 OS=Homo sapiens GN=PSMD3 PE=1 SV=2	4	5	55	1.059
	SP://Q13310	PABP4_HUMAN Polyadenylate_binding protein 4 OS=Homo sapiens GN=PABPC4 PE=1 SV=1	4	5	24	1.037
	SP://Q15008	PSMD6_HUMAN 26S proteasome non_ATPase regulatory subunit 6 OS=Homo sapiens GN=PSMD6 PE=1 SV=1	4	8	67	1.032
	SP://P30520	PURA2_HUMAN Adenylosuccinate synthetase isozyme 2 OS=Homo sapiens GN=ADSS PE=1 SV=3	4	4	52	1.03
	SP://P53618	COPB_HUMAN Coatomer subunit beta OS=Homo sapiens GN=COPB1 PE=1 SV=3	4	6	17	1.021
	SP://P05387	RLA2_HUMAN 60S acidic ribosomal protein P2 OS=Homo sapiens GN=RPLP2 PE=1 SV=1	4	8	95	1.01
	SP://P46777	RL5_HUMAN 60S ribosomal protein L5 OS=Homo sapiens GN=RPL5 PE=1 SV=3	4	7	110	0.999
	SP://Q01105	SET_HUMAN Protein SET OS=Homo sapiens GN=SET PE=1 SV=3	4	4	81	0.986
	SP://Q12905	ILF2_HUMAN Interleukin enhancer_binding factor 2 OS=Homo sapiens GN=ILF2 PE=1 SV=2	4	6	29	0.985
	SP://Q02878	RL6_HUMAN 60S ribosomal protein L6 OS=Homo sapiens GN=RPL6 PE=1 SV=3	4	5	51	0.984
	SP://Q96TA1	NIBL1_HUMAN Niban_like protein 1 OS=Homo sapiens GN=FAM129B PE=1 SV=3	4	6	33	0.971
	SP://P61981	1433G_HUMAN 14_3_3 protein gamma OS=Homo sapiens GN=YWHAG PE=1 SV=2	4	6	59	0.952
	SP://P15311	EZRI_HUMAN Ezrin OS=Homo sapiens GN=EZR PE=1 SV=4	4	4	8	0.952
	SP://P62280	RS11_HUMAN 40S ribosomal protein S11 OS=Homo sapiens GN=RPS11 PE=1 SV=3	4	7	41	0.951
	SP://P31946	1433B_HUMAN 14_3_3 protein beta/alpha OS=Homo sapiens GN=YWHAB PE=1 SV=3	4	6	98	0.934
	SP://Q14568	HS902_HUMAN Putative heat shock protein HSP 90_alpha A2 OS=Homo sapiens GN=HSP90AA2 PE=1 SV=2	4	13	264	0.929
	SP://Q9Y617	SERC_HUMAN Phosphoserine aminotransferase OS=Homo sapiens GN=PSAT1 PE=1 SV=2	4	4	35	0.927
	SP://Q09666	AHNK_HUMAN Neuroblast differentiation_associated protein AHNAK OS=Homo sapiens GN=AHNAK PE=1 SV=2	4	5	6	0.922
	SP://Q16543	CDC37_HUMAN Hsp90 co_chaperone Cdc37 OS=Homo sapiens GN=CDC37 PE=1 SV=1	4	5	66	0.907
	SP://O00303	EIF3F_HUMAN Eukaryotic translation initiation factor 3 subunit F OS=Homo sapiens GN=EIF3F PE=1 SV=1	4	5	43	0.903
	SP://Q70CQ2	UBP34_HUMAN Ubiquitin carboxyl_terminal hydrolase 34 OS=Homo sapiens GN=USP34 PE=1 SV=2	4	4	5	0.901
	SP://P31948	STIP1_HUMAN Stress_induced_phosphoprotein 1 OS=Homo sapiens GN=STIP1 PE=1 SV=1	4	9	120	0.9
	SP://Q9P2J5	SYLC_HUMAN Leucine__tRNA ligase_ cytoplasmic OS=Homo sapiens GN=LARS PE=1 SV=2	4	4	33	0.892
	SP://P47756	CAPZB_HUMAN F_actin_capping protein subunit beta OS=Homo sapiens GN=CAPZB PE=1 SV=4	4	4	36	0.878
	SP://Q9UQ80	PA2G4_HUMAN Proliferation_associated protein 2G4 OS=Homo sapiens GN=PA2G4 PE=1 SV=3	4	6	83	0.857
	SP://P46940	IQGA1_HUMAN Ras GTPase_activating_like protein IQGAP1 OS=Homo sapiens GN=IQGAP1 PE=1 SV=1	4	4	46	0.856
	SP://Q6P2Q9	PRP8_HUMAN Pre_mRNA_processing_splicing factor 8 OS=Homo sapiens GN=PRPF8 PE=1 SV=2	4	3	11	0.842
	SP://P41091	IF2G_HUMAN Eukaryotic translation initiation factor 2 subunit 3 OS=Homo sapiens GN=EIF2S3 PE=1 SV=3	4	8	62	0.813
	SP://P23381	SYWC_HUMAN Tryptophan__tRNA ligase_ cytoplasmic OS=Homo sapiens GN=WARS PE=1 SV=2	4	5	24	0.806
	SP://Q15365	PCBP1_HUMAN Poly(rC)_binding protein 1 OS=Homo sapiens GN=PCBP1 PE=1 SV=2	4	5	83	0.797
	SP://P07737	PROF1_HUMAN Profilin_1 OS=Homo sapiens GN=PFN1 PE=1 SV=2	4	11	229	0.78
	SP://Q01082	SPTB2_HUMAN Spectrin beta chain_ brain 1 OS=Homo sapiens GN=SPTBN1 PE=1 SV=2	4	5	31	0.752
	SP://P18669	PGAM1_HUMAN Phosphoglycerate mutase 1 OS=Homo sapiens GN=PGAM1 PE=1 SV=2	4	8	83	0.735
	SP://P26641	EF1G_HUMAN Elongation factor 1_gamma OS=Homo sapiens GN=EEF1G PE=1 SV=3	4	6	49	0.648
	SP://P06744	G6PI_HUMAN Glucose_6_phosphate isomerase OS=Homo sapiens GN=GPI PE=1 SV=4	4	4	19	0.318
	SP://P22087	FBRL_HUMAN rRNA 2__O_methyltransferase fibrillarin OS=Homo sapiens GN=FBL PE=1 SV=2	3	4	21	4.862
	SP://P38159	RBMX_HUMAN RNA_binding motif protein_ X chromosome OS=Homo sapiens GN=RBMX PE=1 SV=3	3	3	39	2.614
	SP://Q96E39	RMXL1_HUMAN RNA binding motif protein_ X_linked_like_1 OS=Homo sapiens GN=RBMXL1 PE=1 SV=1	3	3	45	1.97
	SP://P50914	RL14_HUMAN 60S ribosomal protein L14 OS=Homo sapiens GN=RPL14 PE=1 SV=4	3	3	36	1.895
	SP://Q99733	NP1L4_HUMAN Nucleosome assembly protein 1_like 4 OS=Homo sapiens GN=NAP1L4 PE=1 SV=1	3	3	45	1.621
	SP://P13929	ENOB_HUMAN Beta_enolase OS=Homo sapiens GN=ENO3 PE=1 SV=4	3	6	161	1.609
	SP://P55209	NP1L1_HUMAN Nucleosome assembly protein 1_like 1 OS=Homo sapiens GN=NAP1L1 PE=1 SV=1	3	4	54	1.573
	SP://P61978	HNRPK_HUMAN Heterogeneous nuclear ribonucleoprotein K OS=Homo sapiens GN=HNRNPK PE=1 SV=1	3	4	85	1.561
	SP://P52272	HNRPM_HUMAN Heterogeneous nuclear ribonucleoprotein M OS=Homo sapiens GN=HNRNPM PE=1 SV=3	3	3	13	1.558
	SP://Q13185	CBX3_HUMAN Chromobox protein homolog 3 OS=Homo sapiens GN=CBX3 PE=1 SV=4	3	4	45	1.525
	SP://O43390	HNRPR_HUMAN Heterogeneous nuclear ribonucleoprotein R OS=Homo sapiens GN=HNRNPR PE=1 SV=1	3	3	32	1.525
	SP://P23246	SFPQ_HUMAN Splicing factor_ proline_ and glutamine_rich OS=Homo sapiens GN=SFPQ PE=1 SV=2	3	3	29	1.519
	SP://P53999	TCP4_HUMAN Activated RNA polymerase II transcriptional coactivator p15 OS=Homo sapiens GN=SUB1 PE=1 SV=3	3	3	28	1.482
	SP://Q9Y3I0	RTCB_HUMAN tRNA_splicing ligase RtcB homolog OS=Homo sapiens GN=C22orf28 PE=1 SV=1	3	3	4	1.445
	SP://O43143	DHX15_HUMAN Putative pre_mRNA_splicing factor ATP_dependent RNA helicase DHX15 OS=Homo sapiens GN=DHX15 PE=1 SV=2	3	3	31	1.429
	SP://Q96RW7	HMCN1_HUMAN Hemicentin_1 OS=Homo sapiens GN=HMCN1 PE=1 SV=2	3	4	12	1.418
	SP://P55795	HNRH2_HUMAN Heterogeneous nuclear ribonucleoprotein H2 OS=Homo sapiens GN=HNRNPH2 PE=1 SV=1	3	5	62	1.398
	SP://P36578	RL4_HUMAN 60S ribosomal protein L4 OS=Homo sapiens GN=RPL4 PE=1 SV=5	3	3	24	1.379
	SP://P46060	RAGP1_HUMAN Ran GTPase_activating protein 1 OS=Homo sapiens GN=RANGAP1 PE=1 SV=1	3	3	37	1.355
	SP://P62917	RL8_HUMAN 60S ribosomal protein L8 OS=Homo sapiens GN=RPL8 PE=1 SV=2	3	6	73	1.345
	SP://P13667	PDIA4_HUMAN Protein disulfide_isomerase A4 OS=Homo sapiens GN=PDIA4 PE=1 SV=2	3	2	14	1.321
	SP://Q8NFI4	F10A5_HUMAN Putative protein FAM10A5 OS=Homo sapiens GN=ST13P5 PE=5 SV=1	3	4	33	1.318
	SP://P62249	RS16_HUMAN 40S ribosomal protein S16 OS=Homo sapiens GN=RPS16 PE=1 SV=2	3	4	37	1.317
	SP://Q9NYF8	BCLF1_HUMAN Bcl_2_associated transcription factor 1 OS=Homo sapiens GN=BCLAF1 PE=1 SV=2	3	3	3	1.307
	SP://Q9C0D4	Z518B_HUMAN Zinc finger protein 518B OS=Homo sapiens GN=ZNF518B PE=2 SV=2	3	3	3	1.294
	SP://P62826	RAN_HUMAN GTP_binding nuclear protein Ran OS=Homo sapiens GN=RAN PE=1 SV=3	3	3	87	1.287
	SP://Q13838	DX39B_HUMAN Spliceosome RNA helicase DDX39B OS=Homo sapiens GN=DDX39B PE=1 SV=1	3	3	19	1.28
	SP://Q7Z5P9	MUC19_HUMAN Mucin_19 OS=Homo sapiens GN=MUC19 PE=1 SV=2	3	3	3	1.265
	SP://P07954	FUMH_HUMAN Fumarate hydratase_ mitochondrial OS=Homo sapiens GN=FH PE=1 SV=3	3	4	37	1.248
	SP://P42677	RS27_HUMAN 40S ribosomal protein S27 OS=Homo sapiens GN=RPS27 PE=1 SV=3	3	4	33	1.24
	SP://Q9Y265	RUVB1_HUMAN RuvB_like 1 OS=Homo sapiens GN=RUVBL1 PE=1 SV=1	3	3	37	1.225
	SP://Q9HCK8	CHD8_HUMAN Chromodomain_helicase_DNA_binding protein 8 OS=Homo sapiens GN=CHD8 PE=1 SV=5	3	3	3	1.218
	SP://Q13435	SF3B2_HUMAN Splicing factor 3B subunit 2 OS=Homo sapiens GN=SF3B2 PE=1 SV=2	3	5	18	1.191
	SP://A5A3E0	POTEF_HUMAN POTE ankyrin domain family member F OS=Homo sapiens GN=POTEF PE=1 SV=2	3	12	241	1.186
	SP://Q6S8J3	POTEE_HUMAN POTE ankyrin domain family member E OS=Homo sapiens GN=POTEE PE=1 SV=3	3	12	241	1.186
	SP://Q9BYX7	ACTBM_HUMAN Putative beta_actin_like protein 3 OS=Homo sapiens GN=POTEKP PE=5 SV=1	3	12	241	1.186
	SP://Q9UMS4	PRP19_HUMAN Pre_mRNA_processing factor 19 OS=Homo sapiens GN=PRPF19 PE=1 SV=1	3	4	57	1.182
	SP://O14737	PDCD5_HUMAN Programmed cell death protein 5 OS=Homo sapiens GN=PDCD5 PE=1 SV=3	3	3	29	1.182
	SP://P11217	PYGM_HUMAN Glycogen phosphorylase_ muscle form OS=Homo sapiens GN=PYGM PE=1 SV=6	3	3	10	1.168
	SP://P18621	RL17_HUMAN 60S ribosomal protein L17 OS=Homo sapiens GN=RPL17 PE=1 SV=3	3	4	48	1.149
	SP://P08865	RSSA_HUMAN 40S ribosomal protein SA OS=Homo sapiens GN=RPSA PE=1 SV=4	3	5	71	1.147
	SP://O75643	U520_HUMAN U5 small nuclear ribonucleoprotein 200 kDa helicase OS=Homo sapiens GN=SNRNP200 PE=1 SV=2	3	3	37	1.143
	SP://P68400	CSK21_HUMAN Casein kinase II subunit alpha OS=Homo sapiens GN=CSNK2A1 PE=1 SV=1	3	4	42	1.142
	SP://P35749	MYH11_HUMAN Myosin_11 OS=Homo sapiens GN=MYH11 PE=1 SV=3	3	3	28	1.136
	SP://P15170	ERF3A_HUMAN Eukaryotic peptide chain release factor GTP_binding subunit ERF3A OS=Homo sapiens GN=GSPT1 PE=1 SV=1	3	3	23	1.134
	SP://Q9NR45	SIAS_HUMAN Sialic acid synthase OS=Homo sapiens GN=NANS PE=1 SV=2	3	4	22	1.12
	SP://P37837	TALDO_HUMAN Transaldolase OS=Homo sapiens GN=TALDO1 PE=1 SV=2	3	3	8	1.118
	SP://O15143	ARC1B_HUMAN Actin_related protein 2/3 complex subunit 1B OS=Homo sapiens GN=ARPC1B PE=1 SV=3	3	3	23	1.113
	SP://B2RPK0	HGB1A_HUMAN Putative high mobility group protein B1_like 1 OS=Homo sapiens GN=HMGB1P1 PE=5 SV=1	3	4	15	1.104
	SP://O95831	AIFM1_HUMAN Apoptosis_inducing factor 1_ mitochondrial OS=Homo sapiens GN=AIFM1 PE=1 SV=1	3	3	11	1.099
	SP://O00154	BACH_HUMAN Cytosolic acyl coenzyme A thioester hydrolase OS=Homo sapiens GN=ACOT7 PE=1 SV=3	3	4	39	1.097
	SP://Q9BUF5	TBB6_HUMAN Tubulin beta_6 chain OS=Homo sapiens GN=TUBB6 PE=1 SV=1	3	5	65	1.093
	SP://P25205	MCM3_HUMAN DNA replication licensing factor MCM3 OS=Homo sapiens GN=MCM3 PE=1 SV=3	3	3	19	1.091
	SP://Q4VXU2	PAP1L_HUMAN Polyadenylate_binding protein 1_like OS=Homo sapiens GN=PABPC1L PE=2 SV=1	3	3	13	1.085
	SP://P18085	ARF4_HUMAN ADP_ribosylation factor 4 OS=Homo sapiens GN=ARF4 PE=1 SV=3	3	5	48	1.078
	SP://P30044	PRDX5_HUMAN Peroxiredoxin_5_ mitochondrial OS=Homo sapiens GN=PRDX5 PE=1 SV=4	3	4	33	1.074
	SP://Q15911	ZFHX3_HUMAN Zinc finger homeobox protein 3 OS=Homo sapiens GN=ZFHX3 PE=1 SV=2	3	3	5	1.074
	SP://P43358	MAGA4_HUMAN Melanoma_associated antigen 4 OS=Homo sapiens GN=MAGEA4 PE=1 SV=2	3	7	115	1.06
	SP://P49368	TCPG_HUMAN T_complex protein 1 subunit gamma OS=Homo sapiens GN=CCT3 PE=1 SV=4	3	3	79	1.056
	SP://Q9NTK5	OLA1_HUMAN Obg_like ATPase 1 OS=Homo sapiens GN=OLA1 PE=1 SV=2	3	3	25	1.055
	SP://P21980	TGM2_HUMAN Protein_glutamine gamma_glutamyltransferase 2 OS=Homo sapiens GN=TGM2 PE=1 SV=2	3	3	22	1.048
	SP://P14625	ENPL_HUMAN Endoplasmin OS=Homo sapiens GN=HSP90B1 PE=1 SV=1	3	5	46	1.04
	SP://P47897	SYQ_HUMAN Glutamine__tRNA ligase OS=Homo sapiens GN=QARS PE=1 SV=1	3	5	29	1.034
	SP://P49321	NASP_HUMAN Nuclear autoantigenic sperm protein OS=Homo sapiens GN=NASP PE=1 SV=2	3	4	41	1.027
	SP://P54577	SYYC_HUMAN Tyrosine__tRNA ligase_ cytoplasmic OS=Homo sapiens GN=YARS PE=1 SV=4	3	3	10	1.027
	SP://Q7Z406	MYH14_HUMAN Myosin_14 OS=Homo sapiens GN=MYH14 PE=1 SV=2	3	4	34	1.024
	SP://P22102	PUR2_HUMAN Trifunctional purine biosynthetic protein adenosine_3 OS=Homo sapiens GN=GART PE=1 SV=1	3	5	27	1.024
	SP://P60866	RS20_HUMAN 40S ribosomal protein S20 OS=Homo sapiens GN=RPS20 PE=1 SV=1	3	7	123	1.023
	SP://P62424	RL7A_HUMAN 60S ribosomal protein L7a OS=Homo sapiens GN=RPL7A PE=1 SV=2	3	4	17	1.018
	SP://Q58FG1	HS904_HUMAN Putative heat shock protein HSP 90_alpha A4 OS=Homo sapiens GN=HSP90AA4P PE=5 SV=1	3	14	281	1.013
	SP://P45974	UBP5_HUMAN Ubiquitin carboxyl_terminal hydrolase 5 OS=Homo sapiens GN=USP5 PE=1 SV=2	3	5	23	1.013
	SP://P09104	ENOG_HUMAN Gamma_enolase OS=Homo sapiens GN=ENO2 PE=1 SV=3	3	7	173	1.012
	SP://Q8NEV8	EXPH5_HUMAN Exophilin_5 OS=Homo sapiens GN=EXPH5 PE=1 SV=3	3	4	4	1.01
	SP://Q14247	SRC8_HUMAN Src substrate cortactin OS=Homo sapiens GN=CTTN PE=1 SV=2	3	3	25	1
	SP://Q9UDT6	CLIP2_HUMAN CAP_Gly domain_containing linker protein 2 OS=Homo sapiens GN=CLIP2 PE=1 SV=1	3	4	8	0.988
	SP://P61160	ARP2_HUMAN Actin_related protein 2 OS=Homo sapiens GN=ACTR2 PE=1 SV=1	3	4	27	0.985
	SP://P39687	AN32A_HUMAN Acidic leucine_rich nuclear phosphoprotein 32 family member A OS=Homo sapiens GN=ANP32A PE=1 SV=1	3	4	33	0.984
	SP://P52597	HNRPF_HUMAN Heterogeneous nuclear ribonucleoprotein F OS=Homo sapiens GN=HNRNPF PE=1 SV=3	3	3	30	0.977
	SP://Q92688	AN32B_HUMAN Acidic leucine_rich nuclear phosphoprotein 32 family member B OS=Homo sapiens GN=ANP32B PE=1 SV=1	3	4	21	0.977
	SP://P08237	K6PF_HUMAN 6_phosphofructokinase_ muscle type OS=Homo sapiens GN=PFKM PE=1 SV=2	3	4	33	0.972
	SP://O95373	IPO7_HUMAN Importin_7 OS=Homo sapiens GN=IPO7 PE=1 SV=1	3	4	48	0.971
	SP://Q01518	CAP1_HUMAN Adenylyl cyclase_associated protein 1 OS=Homo sapiens GN=CAP1 PE=1 SV=5	3	3	56	0.959
	SP://Q58FG0	HS905_HUMAN Putative heat shock protein HSP 90_alpha A5 OS=Homo sapiens GN=HSP90AA5P PE=1 SV=1	3	4	67	0.957
	SP://Q5TZA2	CROCC_HUMAN Rootletin OS=Homo sapiens GN=CROCC PE=1 SV=1	3	4	24	0.936
	SP://Q7L014	DDX46_HUMAN Probable ATP_dependent RNA helicase DDX46 OS=Homo sapiens GN=DDX46 PE=1 SV=2	3	2	22	0.934
	SP://O15078	CE290_HUMAN Centrosomal protein of 290 kDa OS=Homo sapiens GN=CEP290 PE=1 SV=2	3	3	3	0.928
	SP://Q9Y566	SHAN1_HUMAN SH3 and multiple ankyrin repeat domains protein 1 OS=Homo sapiens GN=SHANK1 PE=1 SV=2	3	3	5	0.916
	SP://P54652	HSP72_HUMAN Heat shock_related 70 kDa protein 2 OS=Homo sapiens GN=HSPA2 PE=1 SV=1	3	4	24	0.902
	SP://O95477	ABCA1_HUMAN ATP_binding cassette sub_family A member 1 OS=Homo sapiens GN=ABCA1 PE=1 SV=3	3	3	5	0.899
	SP://P62191	PRS4_HUMAN 26S protease regulatory subunit 4 OS=Homo sapiens GN=PSMC1 PE=1 SV=1	3	3	29	0.896
	SP://Q13200	PSMD2_HUMAN 26S proteasome non_ATPase regulatory subunit 2 OS=Homo sapiens GN=PSMD2 PE=1 SV=3	3	4	28	0.895
	SP://Q7Z6Z7	HUWE1_HUMAN E3 ubiquitin_protein ligase HUWE1 OS=Homo sapiens GN=HUWE1 PE=1 SV=3	3	3	5	0.885
	SP://P48444	COPD_HUMAN Coatomer subunit delta OS=Homo sapiens GN=ARCN1 PE=1 SV=1	3	4	32	0.876
	SP://P30153	2AAA_HUMAN Serine/threonine_protein phosphatase 2A 65 kDa regulatory subunit A alpha isoform OS=Homo sapiens GN=PPP2R1A PE=1 SV=4	3	4	21	0.865
	SP://Q9BYT3	STK33_HUMAN Serine/threonine_protein kinase 33 OS=Homo sapiens GN=STK33 PE=1 SV=1	3	3	4	0.862
	SP://P62081	RS7_HUMAN 40S ribosomal protein S7 OS=Homo sapiens GN=RPS7 PE=1 SV=1	3	3	26	0.856
	SP://O60664	PLIN3_HUMAN Perilipin_3 OS=Homo sapiens GN=PLIN3 PE=1 SV=3	3	4	31	0.853
	SP://P46926	GNPI1_HUMAN Glucosamine_6_phosphate isomerase 1 OS=Homo sapiens GN=GNPDA1 PE=1 SV=1	3	4	15	0.846
	SP://P62899	RL31_HUMAN 60S ribosomal protein L31 OS=Homo sapiens GN=RPL31 PE=1 SV=1	3	4	26	0.824
	SP://Q2VIR3	IF2GL_HUMAN Putative eukaryotic translation initiation factor 2 subunit 3_like protein OS=Homo sapiens GN=EIF2S3L PE=5 SV=2	3	5	48	0.786
	SP://P16989	DBPA_HUMAN DNA_binding protein A OS=Homo sapiens GN=CSDA PE=1 SV=4	3	6	54	0.778
	SP://Q9BXX3	AN30A_HUMAN Ankyrin repeat domain_containing protein 30A OS=Homo sapiens GN=ANKRD30A PE=1 SV=3	3	3	5	0.777
	SP://Q96LP6	CL042_HUMAN Uncharacterized protein C12orf42 OS=Homo sapiens GN=C12orf42 PE=2 SV=2	3	2	8	0.763
	SP://P35241	RADI_HUMAN Radixin OS=Homo sapiens GN=RDX PE=1 SV=1	3	3	7	0.76
	SP://P67809	YBOX1_HUMAN Nuclease_sensitive element_binding protein 1 OS=Homo sapiens GN=YBX1 PE=1 SV=3	3	7	87	0.758
	SP://Q15393	SF3B3_HUMAN Splicing factor 3B subunit 3 OS=Homo sapiens GN=SF3B3 PE=1 SV=4	3	3	38	0.622
	SP://P60900	PSA6_HUMAN Proteasome subunit alpha type_6 OS=Homo sapiens GN=PSMA6 PE=1 SV=1	3	5	12	0.547
	SP://P22392	NDKB_HUMAN Nucleoside diphosphate kinase B OS=Homo sapiens GN=NME2 PE=1 SV=1	3	8	89	0.485
	SP://P07205	PGK2_HUMAN Phosphoglycerate kinase 2 OS=Homo sapiens GN=PGK2 PE=1 SV=3	3	6	92	0.439
	SP://P62318	SMD3_HUMAN Small nuclear ribonucleoprotein Sm D3 OS=Homo sapiens GN=SNRPD3 PE=1 SV=1	3	3	19	0.22
	SP://P49721	PSB2_HUMAN Proteasome subunit beta type_2 OS=Homo sapiens GN=PSMB2 PE=1 SV=1	3	4	17	0.135
	SP://P00505	AATM_HUMAN Aspartate aminotransferase_ mitochondrial OS=Homo sapiens GN=GOT2 PE=1 SV=3	2	3	9	2.531
	SP://P0C0S8	H2A1_HUMAN Histone H2A type 1 OS=Homo sapiens GN=HIST1H2AG PE=1 SV=2	2	2	8	2.474
	SP://P20671	H2A1D_HUMAN Histone H2A type 1_D OS=Homo sapiens GN=HIST1H2AD PE=1 SV=2	2	2	8	2.474
	SP://Q16777	H2A2C_HUMAN Histone H2A type 2_C OS=Homo sapiens GN=HIST2H2AC PE=1 SV=4	2	2	8	2.474
	SP://Q6FI13	H2A2A_HUMAN Histone H2A type 2_A OS=Homo sapiens GN=HIST2H2AA3 PE=1 SV=3	2	2	8	2.474
	SP://Q96KK5	H2A1H_HUMAN Histone H2A type 1_H OS=Homo sapiens GN=HIST1H2AH PE=1 SV=3	2	2	8	2.474
	SP://Q99878	H2A1J_HUMAN Histone H2A type 1_J OS=Homo sapiens GN=HIST1H2AJ PE=1 SV=3	2	2	8	2.474
	SP://Q9BTM1	H2AJ_HUMAN Histone H2A.J OS=Homo sapiens GN=H2AFJ PE=1 SV=1	2	2	8	2.474
	SP://P78364	PHC1_HUMAN Polyhomeotic_like protein 1 OS=Homo sapiens GN=PHC1 PE=1 SV=3	2	1	2	2.452
	SP://Q96AA8	JKIP2_HUMAN Janus kinase and microtubule_interacting protein 2 OS=Homo sapiens GN=JAKMIP2 PE=2 SV=1	2	1	12	2.158
	SP://Q04917	1433F_HUMAN 14_3_3 protein eta OS=Homo sapiens GN=YWHAH PE=1 SV=4	2	2	14	2.026
	SP://P13693	TCTP_HUMAN Translationally_controlled tumor protein OS=Homo sapiens GN=TPT1 PE=1 SV=1	2	2	17	1.904
	SP://Q99729	ROAA_HUMAN Heterogeneous nuclear ribonucleoprotein A/B OS=Homo sapiens GN=HNRNPAB PE=1 SV=2	2	4	22	1.897
	SP://Q5M9N0	CD158_HUMAN Coiled_coil domain_containing protein 158 OS=Homo sapiens GN=CCDC158 PE=2 SV=2	2	3	6	1.872
	SP://P62910	RL32_HUMAN 60S ribosomal protein L32 OS=Homo sapiens GN=RPL32 PE=1 SV=2	2	2	33	1.813
	SP://Q9NR30	DDX21_HUMAN Nucleolar RNA helicase 2 OS=Homo sapiens GN=DDX21 PE=1 SV=5	2	2	6	1.813
	SP://P46783	RS10_HUMAN 40S ribosomal protein S10 OS=Homo sapiens GN=RPS10 PE=1 SV=1	2	5	22	1.797
	SP://Q9NQ39	RS10L_HUMAN Putative 40S ribosomal protein S10_like OS=Homo sapiens GN=RPS10P5 PE=5 SV=1	2	5	22	1.797
	SP://O60812	HNRCL_HUMAN Heterogeneous nuclear ribonucleoprotein C_like 1 OS=Homo sapiens GN=HNRNPCL1 PE=1 SV=1	2	3	21	1.775
	SP://P09382	LEG1_HUMAN Galectin_1 OS=Homo sapiens GN=LGALS1 PE=1 SV=2	2	3	79	1.73
	SP://O14979	HNRDL_HUMAN Heterogeneous nuclear ribonucleoprotein D_like OS=Homo sapiens GN=HNRPDL PE=1 SV=3	2	2	2	1.692
	SP://Q9UL46	PSME2_HUMAN Proteasome activator complex subunit 2 OS=Homo sapiens GN=PSME2 PE=1 SV=4	2	3	26	1.666
	SP://Q9Y2X3	NOP58_HUMAN Nucleolar protein 58 OS=Homo sapiens GN=NOP58 PE=1 SV=1	2	2	2	1.658
	SP://P39023	RL3_HUMAN 60S ribosomal protein L3 OS=Homo sapiens GN=RPL3 PE=1 SV=2	2	4	16	1.65
	SP://P23378	GCSP_HUMAN Glycine dehydrogenase [decarboxylating]_ mitochondrial OS=Homo sapiens GN=GLDC PE=1 SV=2	2	1	2	1.632
	SP://Q96T17	MA7D2_HUMAN MAP7 domain_containing protein 2 OS=Homo sapiens GN=MAP7D2 PE=1 SV=2	2	2	28	1.619
	SP://Q14677	EPN4_HUMAN Clathrin interactor 1 OS=Homo sapiens GN=CLINT1 PE=1 SV=1	2	2	3	1.612
	SP://P52292	IMA2_HUMAN Importin subunit alpha_2 OS=Homo sapiens GN=KPNA2 PE=1 SV=1	2	2	14	1.597
	SP://P11413	G6PD_HUMAN Glucose_6_phosphate 1_dehydrogenase OS=Homo sapiens GN=G6PD PE=1 SV=4	2	2	3	1.594
	SP://Q07666	KHDR1_HUMAN KH domain_containing_ RNA_binding_ signal transduction_associated protein 1 OS=Homo sapiens GN=KHDRBS1 PE=1 SV=1	2	3	8	1.588
	SP://P12270	TPR_HUMAN Nucleoprotein TPR OS=Homo sapiens GN=TPR PE=1 SV=3	2	2	2	1.566
	SP://Q9NYQ6	CELR1_HUMAN Cadherin EGF LAG seven_pass G_type receptor 1 OS=Homo sapiens GN=CELSR1 PE=1 SV=1	2	2	3	1.565
	SP://P55036	PSMD4_HUMAN 26S proteasome non_ATPase regulatory subunit 4 OS=Homo sapiens GN=PSMD4 PE=1 SV=1	2	2	20	1.547
	SP://Q92859	NEO1_HUMAN Neogenin OS=Homo sapiens GN=NEO1 PE=1 SV=2	2	3	8	1.525
	SP://Q16629	SRSF7_HUMAN Serine/arginine_rich splicing factor 7 OS=Homo sapiens GN=SRSF7 PE=1 SV=1	2	2	26	1.518
	SP://P62269	RS18_HUMAN 40S ribosomal protein S18 OS=Homo sapiens GN=RPS18 PE=1 SV=3	2	2	34	1.491
	SP://Q8IZP2	ST134_HUMAN Putative protein FAM10A4 OS=Homo sapiens GN=ST13P4 PE=5 SV=1	2	3	32	1.482
	SP://Q8TE57	ATS16_HUMAN A disintegrin and metalloproteinase with thrombospondin motifs 16 OS=Homo sapiens GN=ADAMTS16 PE=1 SV=3	2	2	7	1.428
	SP://O75116	ROCK2_HUMAN Rho_associated protein kinase 2 OS=Homo sapiens GN=ROCK2 PE=1 SV=4	2	2	4	1.426
	SP://Q9Y263	PLAP_HUMAN Phospholipase A_2_activating protein OS=Homo sapiens GN=PLAA PE=1 SV=2	2	2	15	1.414
	SP://Q5VUA4	ZN318_HUMAN Zinc finger protein 318 OS=Homo sapiens GN=ZNF318 PE=1 SV=2	2	2	6	1.414
	SP://O43684	BUB3_HUMAN Mitotic checkpoint protein BUB3 OS=Homo sapiens GN=BUB3 PE=1 SV=1	2	2	7	1.395
	SP://Q6NZI2	PTRF_HUMAN Polymerase I and transcript release factor OS=Homo sapiens GN=PTRF PE=1 SV=1	2	2	10	1.382
	SP://O14920	IKKB_HUMAN Inhibitor of nuclear factor kappa_B kinase subunit beta OS=Homo sapiens GN=IKBKB PE=1 SV=1	2	2	2	1.378
	SP://Q2TAY7	SMU1_HUMAN WD40 repeat_containing protein SMU1 OS=Homo sapiens GN=SMU1 PE=1 SV=2	2	3	9	1.375
	SP://Q9BZF9	UACA_HUMAN Uveal autoantigen with coiled_coil domains and ankyrin repeats OS=Homo sapiens GN=UACA PE=1 SV=2	2	2	5	1.363
	SP://Q9Y2V7	COG6_HUMAN Conserved oligomeric Golgi complex subunit 6 OS=Homo sapiens GN=COG6 PE=2 SV=2	2	2	2	1.361
	SP://Q71UM5	RS27L_HUMAN 40S ribosomal protein S27_like OS=Homo sapiens GN=RPS27L PE=1 SV=3	2	2	30	1.359
	SP://Q8WXX0	DYH7_HUMAN Dynein heavy chain 7_ axonemal OS=Homo sapiens GN=DNAH7 PE=1 SV=2	2	2	8	1.357
	SP://P32119	PRDX2_HUMAN Peroxiredoxin_2 OS=Homo sapiens GN=PRDX2 PE=1 SV=5	2	2	7	1.357
	SP://Q12767	K0195_HUMAN Uncharacterized protein KIAA0195 OS=Homo sapiens GN=KIAA0195 PE=1 SV=1	2	2	3	1.342
	SP://Q7Z3E2	CJ118_HUMAN Uncharacterized protein C10orf118 OS=Homo sapiens GN=C10orf118 PE=2 SV=2	2	2	4	1.339
	SP://Q5VT06	CE350_HUMAN Centrosome_associated protein 350 OS=Homo sapiens GN=CEP350 PE=1 SV=1	2	2	2	1.339
	SP://Q96CN4	EVI5L_HUMAN EVI5_like protein OS=Homo sapiens GN=EVI5L PE=1 SV=1	2	2	2	1.339
	SP://Q15431	SYCP1_HUMAN Synaptonemal complex protein 1 OS=Homo sapiens GN=SYCP1 PE=1 SV=2	2	1	5	1.324
	SP://P60660	MYL6_HUMAN Myosin light polypeptide 6 OS=Homo sapiens GN=MYL6 PE=1 SV=2	2	2	43	1.322
	SP://Q96QU8	XPO6_HUMAN Exportin_6 OS=Homo sapiens GN=XPO6 PE=1 SV=1	2	2	2	1.322
	SP://Q99996	AKAP9_HUMAN A_kinase anchor protein 9 OS=Homo sapiens GN=AKAP9 PE=1 SV=3	2	2	8	1.318
	SP://Q9Y2F5	K0947_HUMAN Uncharacterized protein KIAA0947 OS=Homo sapiens GN=KIAA0947 PE=1 SV=5	2	2	2	1.312
	SP://P27348	1433T_HUMAN 14_3_3 protein theta OS=Homo sapiens GN=YWHAQ PE=1 SV=1	2	2	14	1.309
	SP://P26583	HMGB2_HUMAN High mobility group protein B2 OS=Homo sapiens GN=HMGB2 PE=1 SV=2	2	3	12	1.309
	SP://Q8TCB7	METL6_HUMAN Methyltransferase_like protein 6 OS=Homo sapiens GN=METTL6 PE=2 SV=2	2	2	5	1.306
	SP://Q9H269	VPS16_HUMAN Vacuolar protein sorting_associated protein 16 homolog OS=Homo sapiens GN=VPS16 PE=1 SV=2	2	2	9	1.302
	SP://O94762	RECQ5_HUMAN ATP_dependent DNA helicase Q5 OS=Homo sapiens GN=RECQL5 PE=1 SV=2	2	2	6	1.288
	SP://P43246	MSH2_HUMAN DNA mismatch repair protein Msh2 OS=Homo sapiens GN=MSH2 PE=1 SV=1	2	2	5	1.286
	SP://Q5JQF8	PAP1M_HUMAN Polyadenylate_binding protein 1_like 2 OS=Homo sapiens GN=PABPC1L2A PE=1 SV=1	2	2	3	1.282
	SP://P35268	RL22_HUMAN 60S ribosomal protein L22 OS=Homo sapiens GN=RPL22 PE=1 SV=2	2	2	37	1.281
	SP://O60284	ST18_HUMAN Suppression of tumorigenicity 18 protein OS=Homo sapiens GN=ST18 PE=1 SV=1	2	2	2	1.278
	SP://Q99715	COCA1_HUMAN Collagen alpha_1(XII) chain OS=Homo sapiens GN=COL12A1 PE=1 SV=2	2	2	15	1.275
	SP://Q9NYL9	TMOD3_HUMAN Tropomodulin_3 OS=Homo sapiens GN=TMOD3 PE=1 SV=1	2	2	3	1.269
	SP://O75592	MYCB2_HUMAN Probable E3 ubiquitin_protein ligase MYCBP2 OS=Homo sapiens GN=MYCBP2 PE=1 SV=3	2	2	4	1.265
	SP://O94956	SO2B1_HUMAN Solute carrier organic anion transporter family member 2B1 OS=Homo sapiens GN=SLCO2B1 PE=1 SV=2	2	2	2	1.262
	SP://Q9BX26	SYCP2_HUMAN Synaptonemal complex protein 2 OS=Homo sapiens GN=SYCP2 PE=2 SV=2	2	2	5	1.251
	SP://P08621	RU17_HUMAN U1 small nuclear ribonucleoprotein 70 kDa OS=Homo sapiens GN=SNRNP70 PE=1 SV=2	2	2	19	1.235
	SP://Q9GZT3	SLIRP_HUMAN SRA stem_loop_interacting RNA_binding protein_ mitochondrial OS=Homo sapiens GN=SLIRP PE=1 SV=1	2	2	3	1.234
	SP://Q8IZD9	DOCK3_HUMAN Dedicator of cytokinesis protein 3 OS=Homo sapiens GN=DOCK3 PE=1 SV=1	2	2	2	1.232
	SP://P62263	RS14_HUMAN 40S ribosomal protein S14 OS=Homo sapiens GN=RPS14 PE=1 SV=3	2	4	48	1.228
	SP://Q14008	CKAP5_HUMAN Cytoskeleton_associated protein 5 OS=Homo sapiens GN=CKAP5 PE=1 SV=3	2	2	2	1.226
	SP://Q99832	TCPH_HUMAN T_complex protein 1 subunit eta OS=Homo sapiens GN=CCT7 PE=1 SV=2	2	4	62	1.223
	SP://P27986	P85A_HUMAN Phosphatidylinositol 3_kinase regulatory subunit alpha OS=Homo sapiens GN=PIK3R1 PE=1 SV=2	2	2	2	1.22
	SP://P0CG38	POTEI_HUMAN POTE ankyrin domain family member I OS=Homo sapiens GN=POTEI PE=3 SV=1	2	4	77	1.219
	SP://P0CG39	POTEJ_HUMAN POTE ankyrin domain family member J OS=Homo sapiens GN=POTEJ PE=3 SV=1	2	4	77	1.219
	SP://Q5JXB2	UE2NL_HUMAN Putative ubiquitin_conjugating enzyme E2 N_like OS=Homo sapiens GN=UBE2NL PE=5 SV=1	2	2	17	1.215
	SP://Q99471	PFD5_HUMAN Prefoldin subunit 5 OS=Homo sapiens GN=PFDN5 PE=1 SV=2	2	2	31	1.212
	SP://P56537	IF6_HUMAN Eukaryotic translation initiation factor 6 OS=Homo sapiens GN=EIF6 PE=1 SV=1	2	3	71	1.206
	SP://P78527	PRKDC_HUMAN DNA_dependent protein kinase catalytic subunit OS=Homo sapiens GN=PRKDC PE=1 SV=3	2	2	5	1.203
	SP://Q6EEV6	SUMO4_HUMAN Small ubiquitin_related modifier 4 OS=Homo sapiens GN=SUMO4 PE=1 SV=2	2	2	37	1.201
	SP://Q7Z7B0	FLIP1_HUMAN Filamin_A_interacting protein 1 OS=Homo sapiens GN=FILIP1 PE=1 SV=1	2	2	6	1.2
	SP://P21817	RYR1_HUMAN Ryanodine receptor 1 OS=Homo sapiens GN=RYR1 PE=1 SV=3	2	2	7	1.198
	SP://Q8IYD1	ERF3B_HUMAN Eukaryotic peptide chain release factor GTP_binding subunit ERF3B OS=Homo sapiens GN=GSPT2 PE=1 SV=2	2	2	20	1.196
	SP://Q92945	FUBP2_HUMAN Far upstream element_binding protein 2 OS=Homo sapiens GN=KHSRP PE=1 SV=4	2	2	16	1.196
	SP://Q9UBQ5	EIF3K_HUMAN Eukaryotic translation initiation factor 3 subunit K OS=Homo sapiens GN=EIF3K PE=1 SV=1	2	3	21	1.189
	SP://P51665	PSD7_HUMAN 26S proteasome non_ATPase regulatory subunit 7 OS=Homo sapiens GN=PSMD7 PE=1 SV=2	2	2	11	1.186
	SP://P05198	IF2A_HUMAN Eukaryotic translation initiation factor 2 subunit 1 OS=Homo sapiens GN=EIF2S1 PE=1 SV=3	2	2	27	1.185
	SP://Q14103	HNRPD_HUMAN Heterogeneous nuclear ribonucleoprotein D0 OS=Homo sapiens GN=HNRNPD PE=1 SV=1	2	5	45	1.184
	SP://P22090	RS4Y1_HUMAN 40S ribosomal protein S4_ Y isoform 1 OS=Homo sapiens GN=RPS4Y1 PE=2 SV=2	2	2	7	1.182
	SP://Q8TD47	RS4Y2_HUMAN 40S ribosomal protein S4_ Y isoform 2 OS=Homo sapiens GN=RPS4Y2 PE=1 SV=3	2	2	7	1.182
	SP://P19320	VCAM1_HUMAN Vascular cell adhesion protein 1 OS=Homo sapiens GN=VCAM1 PE=1 SV=1	2	3	5	1.18
	SP://P63220	RS21_HUMAN 40S ribosomal protein S21 OS=Homo sapiens GN=RPS21 PE=1 SV=1	2	5	54	1.177
	SP://P62750	RL23A_HUMAN 60S ribosomal protein L23a OS=Homo sapiens GN=RPL23A PE=1 SV=1	2	3	28	1.175
	SP://P84098	RL19_HUMAN 60S ribosomal protein L19 OS=Homo sapiens GN=RPL19 PE=1 SV=1	2	4	48	1.169
	SP://Q9BXT6	M10L1_HUMAN Putative helicase Mov10l1 OS=Homo sapiens GN=MOV10L1 PE=1 SV=1	2	2	2	1.169
	SP://P53667	LIMK1_HUMAN LIM domain kinase 1 OS=Homo sapiens GN=LIMK1 PE=1 SV=3	2	3	4	1.167
	SP://P23284	PPIB_HUMAN Peptidyl_prolyl cis_trans isomerase B OS=Homo sapiens GN=PPIB PE=1 SV=2	2	3	9	1.164
	SP://P20929	NEBU_HUMAN Nebulin OS=Homo sapiens GN=NEB PE=1 SV=4	2	3	8	1.162
	SP://Q08378	GOGA3_HUMAN Golgin subfamily A member 3 OS=Homo sapiens GN=GOLGA3 PE=1 SV=2	2	2	6	1.156
	SP://O60684	IMA7_HUMAN Importin subunit alpha_7 OS=Homo sapiens GN=KPNA6 PE=1 SV=1	2	2	7	1.151
	SP://P52294	IMA1_HUMAN Importin subunit alpha_1 OS=Homo sapiens GN=KPNA1 PE=1 SV=3	2	2	7	1.151
	SP://Q9Y266	NUDC_HUMAN Nuclear migration protein nudC OS=Homo sapiens GN=NUDC PE=1 SV=1	2	2	24	1.149
	SP://Q14203	DCTN1_HUMAN Dynactin subunit 1 OS=Homo sapiens GN=DCTN1 PE=1 SV=3	2	2	2	1.147
	SP://P42766	RL35_HUMAN 60S ribosomal protein L35 OS=Homo sapiens GN=RPL35 PE=1 SV=2	2	3	37	1.144
	SP://Q9H6A9	PCX3_HUMAN Pecanex_like protein 3 OS=Homo sapiens GN=PCNXL3 PE=1 SV=2	2	3	6	1.141
	SP://Q7L622	G2E3_HUMAN G2/M phase_specific E3 ubiquitin_protein ligase OS=Homo sapiens GN=G2E3 PE=1 SV=1	2	2	4	1.138
	SP://Q12931	TRAP1_HUMAN Heat shock protein 75 kDa_ mitochondrial OS=Homo sapiens GN=TRAP1 PE=1 SV=3	2	4	77	1.134
	SP://Q9Y4D8	K0614_HUMAN Probable E3 ubiquitin_protein ligase C12orf51 OS=Homo sapiens GN=C12orf51 PE=1 SV=5	2	2	6	1.131
	SP://Q7RTX8	HIN1L_HUMAN Putative HIN1_like protein OS=Homo sapiens GN=HIN1L PE=5 SV=1	2	2	16	1.127
	SP://P50570	DYN2_HUMAN Dynamin_2 OS=Homo sapiens GN=DNM2 PE=1 SV=2	2	2	14	1.125
	SP://Q05193	DYN1_HUMAN Dynamin_1 OS=Homo sapiens GN=DNM1 PE=1 SV=2	2	2	14	1.125
	SP://Q9UQ16	DYN3_HUMAN Dynamin_3 OS=Homo sapiens GN=DNM3 PE=1 SV=4	2	2	14	1.125
	SP://P01133	EGF_HUMAN Pro_epidermal growth factor OS=Homo sapiens GN=EGF PE=1 SV=2	2	2	5	1.122
	SP://P10412	H14_HUMAN Histone H1.4 OS=Homo sapiens GN=HIST1H1E PE=1 SV=2	2	2	26	1.12
	SP://P16402	H13_HUMAN Histone H1.3 OS=Homo sapiens GN=HIST1H1D PE=1 SV=2	2	2	26	1.12
	SP://P16403	H12_HUMAN Histone H1.2 OS=Homo sapiens GN=HIST1H1C PE=1 SV=2	2	2	26	1.12
	SP://O75970	MPDZ_HUMAN Multiple PDZ domain protein OS=Homo sapiens GN=MPDZ PE=1 SV=2	2	2	3	1.12
	SP://Q9Y618	NCOR2_HUMAN Nuclear receptor corepressor 2 OS=Homo sapiens GN=NCOR2 PE=1 SV=2	2	2	2	1.12
	SP://P46063	RECQ1_HUMAN ATP_dependent DNA helicase Q1 OS=Homo sapiens GN=RECQL PE=1 SV=3	2	2	2	1.115
	SP://O75153	K0664_HUMAN Protein KIAA0664 OS=Homo sapiens GN=KIAA0664 PE=1 SV=2	2	2	3	1.111
	SP://Q9NQC3	RTN4_HUMAN Reticulon_4 OS=Homo sapiens GN=RTN4 PE=1 SV=2	2	2	23	1.103
	SP://A8K8P3	SFI1_HUMAN Protein SFI1 homolog OS=Homo sapiens GN=SFI1 PE=1 SV=2	2	2	3	1.1
	SP://P55265	DSRAD_HUMAN Double_stranded RNA_specific adenosine deaminase OS=Homo sapiens GN=ADAR PE=1 SV=4	2	2	2	1.094
	SP://O00487	PSDE_HUMAN 26S proteasome non_ATPase regulatory subunit 14 OS=Homo sapiens GN=PSMD14 PE=1 SV=1	2	3	28	1.093
	SP://Q96CW6	S7A6O_HUMAN Probable RNA polymerase II nuclear localization protein SLC7A6OS OS=Homo sapiens GN=SLC7A6OS PE=1 SV=2	2	2	6	1.09
	SP://Q8NFA0	UBP32_HUMAN Ubiquitin carboxyl_terminal hydrolase 32 OS=Homo sapiens GN=USP32 PE=1 SV=1	2	1	2	1.09
	SP://Q9Y4G6	TLN2_HUMAN Talin_2 OS=Homo sapiens GN=TLN2 PE=1 SV=4	2	3	4	1.084
	SP://P62277	RS13_HUMAN 40S ribosomal protein S13 OS=Homo sapiens GN=RPS13 PE=1 SV=2	2	4	41	1.081
	SP://O60336	MABP1_HUMAN Mitogen_activated protein kinase_binding protein 1 OS=Homo sapiens GN=MAPKBP1 PE=2 SV=4	2	2	3	1.08
	SP://Q9UKX2	MYH2_HUMAN Myosin_2 OS=Homo sapiens GN=MYH2 PE=1 SV=1	2	2	9	1.078
	SP://P84085	ARF5_HUMAN ADP_ribosylation factor 5 OS=Homo sapiens GN=ARF5 PE=1 SV=2	2	3	25	1.072
	SP://P51148	RAB5C_HUMAN Ras_related protein Rab_5C OS=Homo sapiens GN=RAB5C PE=1 SV=2	2	2	2	1.069
	SP://P25054	APC_HUMAN Adenomatous polyposis coli protein OS=Homo sapiens GN=APC PE=1 SV=2	2	2	4	1.066
	SP://Q16281	CNGA3_HUMAN Cyclic nucleotide_gated cation channel alpha_3 OS=Homo sapiens GN=CNGA3 PE=1 SV=2	2	2	18	1.064
	SP://Q9Y570	PPME1_HUMAN Protein phosphatase methylesterase 1 OS=Homo sapiens GN=PPME1 PE=1 SV=3	2	2	7	1.064
	SP://Q9UPN3	MACF1_HUMAN Microtubule_actin cross_linking factor 1_ isoforms 1/2/3/5 OS=Homo sapiens GN=MACF1 PE=1 SV=4	2	2	4	1.064
	SP://Q92503	S14L1_HUMAN SEC14_like protein 1 OS=Homo sapiens GN=SEC14L1 PE=1 SV=2	2	2	2	1.064
	SP://O75083	WDR1_HUMAN WD repeat_containing protein 1 OS=Homo sapiens GN=WDR1 PE=1 SV=4	2	2	20	1.061
	SP://P11055	MYH3_HUMAN Myosin_3 OS=Homo sapiens GN=MYH3 PE=1 SV=3	2	2	6	1.06
	SP://P63173	RL38_HUMAN 60S ribosomal protein L38 OS=Homo sapiens GN=RPL38 PE=1 SV=2	2	3	32	1.059
	SP://Q9P258	RCC2_HUMAN Protein RCC2 OS=Homo sapiens GN=RCC2 PE=1 SV=2	2	3	12	1.059
	SP://Q9C093	SPEF2_HUMAN Sperm flagellar protein 2 OS=Homo sapiens GN=SPEF2 PE=1 SV=2	2	3	5	1.059
	SP://Q9NTJ3	SMC4_HUMAN Structural maintenance of chromosomes protein 4 OS=Homo sapiens GN=SMC4 PE=1 SV=2	2	2	2	1.057
	SP://Q01813	K6PP_HUMAN 6_phosphofructokinase type C OS=Homo sapiens GN=PFKP PE=1 SV=2	2	2	31	1.056
	SP://P12036	NFH_HUMAN Neurofilament heavy polypeptide OS=Homo sapiens GN=NEFH PE=1 SV=4	2	3	46	1.055
	SP://O75363	BCAS1_HUMAN Breast carcinoma_amplified sequence 1 OS=Homo sapiens GN=BCAS1 PE=1 SV=2	2	2	4	1.05
	SP://Q9Y4D2	DGLA_HUMAN Sn1_specific diacylglycerol lipase alpha OS=Homo sapiens GN=DAGLA PE=1 SV=3	2	2	6	1.048
	SP://Q5SW79	CE170_HUMAN Centrosomal protein of 170 kDa OS=Homo sapiens GN=CEP170 PE=1 SV=1	2	2	5	1.048
	SP://P60228	EIF3E_HUMAN Eukaryotic translation initiation factor 3 subunit E OS=Homo sapiens GN=EIF3E PE=1 SV=1	2	2	3	1.047
	SP://P27816	MAP4_HUMAN Microtubule_associated protein 4 OS=Homo sapiens GN=MAP4 PE=1 SV=3	2	2	7	1.044
	SP://Q5CZC0	FSIP2_HUMAN Fibrous sheath_interacting protein 2 OS=Homo sapiens GN=FSIP2 PE=1 SV=4	2	2	2	1.042
	SP://Q92614	MY18A_HUMAN Unconventional myosin_XVIIIa OS=Homo sapiens GN=MYO18A PE=1 SV=3	2	2	10	1.039
	SP://Q9GZY0	NXF2_HUMAN Nuclear RNA export factor 2 OS=Homo sapiens GN=NXF2 PE=1 SV=1	2	3	3	1.039
	SP://O00471	EXOC5_HUMAN Exocyst complex component 5 OS=Homo sapiens GN=EXOC5 PE=1 SV=1	2	1	4	1.032
	SP://Q7KZF4	SND1_HUMAN Staphylococcal nuclease domain_containing protein 1 OS=Homo sapiens GN=SND1 PE=1 SV=1	2	2	2	1.029
	SP://Q12955	ANK3_HUMAN Ankyrin_3 OS=Homo sapiens GN=ANK3 PE=1 SV=3	2	2	2	1.027
	SP://Q9UNM6	PSD13_HUMAN 26S proteasome non_ATPase regulatory subunit 13 OS=Homo sapiens GN=PSMD13 PE=1 SV=2	2	2	55	1.026
	SP://Q13630	FCL_HUMAN GDP_L_fucose synthase OS=Homo sapiens GN=TSTA3 PE=1 SV=1	2	2	15	1.026
	SP://A8MWY0	K132L_HUMAN UPF0577 protein KIAA1324_like OS=Homo sapiens GN=KIAA1324L PE=2 SV=2	2	2	4	1.023
	SP://P13797	PLST_HUMAN Plastin_3 OS=Homo sapiens GN=PLS3 PE=1 SV=4	2	2	2	1.023
	SP://Q00975	CAC1B_HUMAN Voltage_dependent N_type calcium channel subunit alpha_1B OS=Homo sapiens GN=CACNA1B PE=1 SV=1	2	3	18	1.021
	SP://Q15181	IPYR_HUMAN Inorganic pyrophosphatase OS=Homo sapiens GN=PPA1 PE=1 SV=2	2	3	11	1.021
	SP://Q02880	TOP2B_HUMAN DNA topoisomerase 2_beta OS=Homo sapiens GN=TOP2B PE=1 SV=3	2	2	3	1.021
	SP://Q8N6L0	CC155_HUMAN Coiled_coil domain_containing protein 155 OS=Homo sapiens GN=CCDC155 PE=2 SV=2	2	2	3	1.021
	SP://P51857	AK1D1_HUMAN 3_oxo_5_beta_steroid 4_dehydrogenase OS=Homo sapiens GN=AKR1D1 PE=1 SV=1	2	2	3	1.017
	SP://P62753	RS6_HUMAN 40S ribosomal protein S6 OS=Homo sapiens GN=RPS6 PE=1 SV=1	2	3	23	1.013
	SP://P17661	DESM_HUMAN Desmin OS=Homo sapiens GN=DES PE=1 SV=3	2	6	138	1.011
	SP://P15924	DESP_HUMAN Desmoplakin OS=Homo sapiens GN=DSP PE=1 SV=3	2	2	7	1.011
	SP://P10809	CH60_HUMAN 60 kDa heat shock protein_ mitochondrial OS=Homo sapiens GN=HSPD1 PE=1 SV=2	2	3	20	1.01
	SP://P17980	PRS6A_HUMAN 26S protease regulatory subunit 6A OS=Homo sapiens GN=PSMC3 PE=1 SV=3	2	3	31	1.005
	SP://Q9NQW6	ANLN_HUMAN Actin_binding protein anillin OS=Homo sapiens GN=ANLN PE=1 SV=2	2	2	2	1.002
	SP://O43933	PEX1_HUMAN Peroxisome biogenesis factor 1 OS=Homo sapiens GN=PEX1 PE=1 SV=1	2	2	4	0.997
	SP://Q6ZT12	UBR3_HUMAN E3 ubiquitin_protein ligase UBR3 OS=Homo sapiens GN=UBR3 PE=2 SV=2	2	2	3	0.996
	SP://O75821	EIF3G_HUMAN Eukaryotic translation initiation factor 3 subunit G OS=Homo sapiens GN=EIF3G PE=1 SV=2	2	2	11	0.994
	SP://Q9NYU1	UGGG2_HUMAN UDP_glucose:glycoprotein glucosyltransferase 2 OS=Homo sapiens GN=UGGT2 PE=1 SV=4	2	2	4	0.992
	SP://P07196	NFL_HUMAN Neurofilament light polypeptide OS=Homo sapiens GN=NEFL PE=1 SV=3	2	3	46	0.991
	SP://P30613	KPYR_HUMAN Pyruvate kinase isozymes R/L OS=Homo sapiens GN=PKLR PE=1 SV=2	2	2	7	0.99
	SP://Q8N841	TTLL6_HUMAN Tubulin polyglutamylase TTLL6 OS=Homo sapiens GN=TTLL6 PE=1 SV=2	2	3	7	0.986
	SP://Q9BV20	MTNA_HUMAN Methylthioribose_1_phosphate isomerase OS=Homo sapiens GN=MRI1 PE=1 SV=1	2	2	27	0.984
	SP://Q96FZ2	CC037_HUMAN UPF0361 protein C3orf37 OS=Homo sapiens GN=C3orf37 PE=1 SV=1	2	2	5	0.981
	SP://Q9Y4C1	KDM3A_HUMAN Lysine_specific demethylase 3A OS=Homo sapiens GN=KDM3A PE=1 SV=4	2	2	4	0.981
	SP://Q8IVF2	AHNK2_HUMAN Protein AHNAK2 OS=Homo sapiens GN=AHNAK2 PE=1 SV=2	2	2	5	0.976
	SP://P26447	S10A4_HUMAN Protein S100_A4 OS=Homo sapiens GN=S100A4 PE=1 SV=1	2	2	26	0.975
	SP://P14324	FPPS_HUMAN Farnesyl pyrophosphate synthase OS=Homo sapiens GN=FDPS PE=1 SV=4	2	4	22	0.967
	SP://P61353	RL27_HUMAN 60S ribosomal protein L27 OS=Homo sapiens GN=RPL27 PE=1 SV=2	2	2	19	0.967
	SP://P16949	STMN1_HUMAN Stathmin OS=Homo sapiens GN=STMN1 PE=1 SV=3	2	2	38	0.965
	SP://Q7Z736	PKHH3_HUMAN Pleckstrin homology domain_containing family H member 3 OS=Homo sapiens GN=PLEKHH3 PE=1 SV=2	2	2	7	0.96
	SP://Q9P225	DYH2_HUMAN Dynein heavy chain 2_ axonemal OS=Homo sapiens GN=DNAH2 PE=1 SV=3	2	3	5	0.96
	SP://Q9H3K6	BOLA2_HUMAN BolA_like protein 2 OS=Homo sapiens GN=BOLA2 PE=1 SV=1	2	4	9	0.956
	SP://O75533	SF3B1_HUMAN Splicing factor 3B subunit 1 OS=Homo sapiens GN=SF3B1 PE=1 SV=3	2	3	8	0.953
	SP://Q13439	GOGA4_HUMAN Golgin subfamily A member 4 OS=Homo sapiens GN=GOLGA4 PE=1 SV=1	2	2	5	0.949
	SP://Q14683	SMC1A_HUMAN Structural maintenance of chromosomes protein 1A OS=Homo sapiens GN=SMC1A PE=1 SV=2	2	3	5	0.948
	SP://A6NDG6	PGP_HUMAN Phosphoglycolate phosphatase OS=Homo sapiens GN=PGP PE=1 SV=1	2	2	2	0.94
	SP://P82094	TMF1_HUMAN TATA element modulatory factor OS=Homo sapiens GN=TMF1 PE=1 SV=2	2	2	25	0.935
	SP://P46778	RL21_HUMAN 60S ribosomal protein L21 OS=Homo sapiens GN=RPL21 PE=1 SV=2	2	4	41	0.934
	SP://Q15366	PCBP2_HUMAN Poly(rC)_binding protein 2 OS=Homo sapiens GN=PCBP2 PE=1 SV=1	2	2	57	0.932
	SP://P06493	CDK1_HUMAN Cyclin_dependent kinase 1 OS=Homo sapiens GN=CDK1 PE=1 SV=3	2	3	32	0.927
	SP://Q92915	FGF14_HUMAN Fibroblast growth factor 14 OS=Homo sapiens GN=FGF14 PE=1 SV=1	2	3	7	0.925
	SP://Q9BUV0	CA063_HUMAN UPF0471 protein C1orf63 OS=Homo sapiens GN=C1orf63 PE=2 SV=2	2	2	2	0.923
	SP://P24941	CDK2_HUMAN Cyclin_dependent kinase 2 OS=Homo sapiens GN=CDK2 PE=1 SV=2	2	2	12	0.922
	SP://Q14055	CO9A2_HUMAN Collagen alpha_2(IX) chain OS=Homo sapiens GN=COL9A2 PE=1 SV=2	2	2	2	0.918
	SP://P55884	EIF3B_HUMAN Eukaryotic translation initiation factor 3 subunit B OS=Homo sapiens GN=EIF3B PE=1 SV=3	2	3	20	0.913
	SP://Q15369	ELOC_HUMAN Transcription elongation factor B polypeptide 1 OS=Homo sapiens GN=TCEB1 PE=1 SV=1	2	3	24	0.912
	SP://Q14444	CAPR1_HUMAN Caprin_1 OS=Homo sapiens GN=CAPRIN1 PE=1 SV=2	2	2	40	0.911
	SP://P50579	AMPM2_HUMAN Methionine aminopeptidase 2 OS=Homo sapiens GN=METAP2 PE=1 SV=1	2	3	8	0.911
	SP://Q9HB71	CYBP_HUMAN Calcyclin_binding protein OS=Homo sapiens GN=CACYBP PE=1 SV=2	2	3	38	0.909
	SP://Q16555	DPYL2_HUMAN Dihydropyrimidinase_related protein 2 OS=Homo sapiens GN=DPYSL2 PE=1 SV=1	2	3	34	0.909
	SP://P62857	RS28_HUMAN 40S ribosomal protein S28 OS=Homo sapiens GN=RPS28 PE=1 SV=1	2	2	44	0.908
	SP://P18124	RL7_HUMAN 60S ribosomal protein L7 OS=Homo sapiens GN=RPL7 PE=1 SV=1	2	2	21	0.908
	SP://Q8WWV6	FCAMR_HUMAN High affinity immunoglobulin alpha and immunoglobulin mu Fc receptor OS=Homo sapiens GN=FCAMR PE=1 SV=1	2	2	2	0.905
	SP://P20810	ICAL_HUMAN Calpastatin OS=Homo sapiens GN=CAST PE=1 SV=4	2	3	25	0.899
	SP://Q8IYY4	DZI1L_HUMAN Zinc finger protein DZIP1L OS=Homo sapiens GN=DZIP1L PE=2 SV=2	2	2	2	0.893
	SP://Q14019	COTL1_HUMAN Coactosin_like protein OS=Homo sapiens GN=COTL1 PE=1 SV=3	2	4	25	0.886
	SP://A6NCL7	AN33B_HUMAN Ankyrin repeat domain_containing protein 33B OS=Homo sapiens GN=ANKRD33B PE=4 SV=1	2	2	2	0.883
	SP://O15144	ARPC2_HUMAN Actin_related protein 2/3 complex subunit 2 OS=Homo sapiens GN=ARPC2 PE=1 SV=1	2	2	27	0.88
	SP://Q8WXU2	DYXC1_HUMAN Dyslexia susceptibility 1 candidate gene 1 protein OS=Homo sapiens GN=DYX1C1 PE=1 SV=2	2	2	2	0.874
	SP://Q8WWK9	CKAP2_HUMAN Cytoskeleton_associated protein 2 OS=Homo sapiens GN=CKAP2 PE=1 SV=1	2	2	12	0.871
	SP://Q15046	SYK_HUMAN Lysine__tRNA ligase OS=Homo sapiens GN=KARS PE=1 SV=3	2	3	12	0.867
	SP://Q8TC59	PIWL2_HUMAN Piwi_like protein 2 OS=Homo sapiens GN=PIWIL2 PE=1 SV=1	2	2	2	0.867
	SP://P62913	RL11_HUMAN 60S ribosomal protein L11 OS=Homo sapiens GN=RPL11 PE=1 SV=2	2	2	35	0.866
	SP://P07741	APT_HUMAN Adenine phosphoribosyltransferase OS=Homo sapiens GN=APRT PE=1 SV=2	2	2	12	0.863
	SP://Q5JSZ5	PRC2B_HUMAN Protein PRRC2B OS=Homo sapiens GN=PRRC2B PE=1 SV=2	2	2	2	0.861
	SP://Q14315	FLNC_HUMAN Filamin_C OS=Homo sapiens GN=FLNC PE=1 SV=3	2	2	46	0.858
	SP://P46781	RS9_HUMAN 40S ribosomal protein S9 OS=Homo sapiens GN=RPS9 PE=1 SV=3	2	2	20	0.856
	SP://Q9UHV9	PFD2_HUMAN Prefoldin subunit 2 OS=Homo sapiens GN=PFDN2 PE=1 SV=1	2	3	48	0.855
	SP://Q08752	PPID_HUMAN Peptidyl_prolyl cis_trans isomerase D OS=Homo sapiens GN=PPID PE=1 SV=3	2	2	3	0.854
	SP://Q8IZ41	RASEF_HUMAN Ras and EF_hand domain_containing protein OS=Homo sapiens GN=RASEF PE=1 SV=1	2	2	2	0.853
	SP://Q14232	EI2BA_HUMAN Translation initiation factor eIF_2B subunit alpha OS=Homo sapiens GN=EIF2B1 PE=1 SV=1	2	6	8	0.851
	SP://P61088	UBE2N_HUMAN Ubiquitin_conjugating enzyme E2 N OS=Homo sapiens GN=UBE2N PE=1 SV=1	2	4	30	0.847
	SP://P15559	NQO1_HUMAN NAD(P)H dehydrogenase [quinone] 1 OS=Homo sapiens GN=NQO1 PE=1 SV=1	2	3	9	0.847
	SP://Q05BV3	EMAL5_HUMAN Echinoderm microtubule_associated protein_like 5 OS=Homo sapiens GN=EML5 PE=2 SV=3	2	2	2	0.846
	SP://P62314	SMD1_HUMAN Small nuclear ribonucleoprotein Sm D1 OS=Homo sapiens GN=SNRPD1 PE=1 SV=1	2	2	23	0.845
	SP://P49588	SYAC_HUMAN Alanine__tRNA ligase_ cytoplasmic OS=Homo sapiens GN=AARS PE=1 SV=2	2	3	18	0.844
	SP://P20290	BTF3_HUMAN Transcription factor BTF3 OS=Homo sapiens GN=BTF3 PE=1 SV=1	2	3	35	0.843
	SP://Q8N5C6	SRBD1_HUMAN S1 RNA_binding domain_containing protein 1 OS=Homo sapiens GN=SRBD1 PE=1 SV=2	2	2	14	0.839
	SP://Q96Q42	ALS2_HUMAN Alsin OS=Homo sapiens GN=ALS2 PE=1 SV=2	2	2	5	0.834
	SP://Q9BRA2	TXD17_HUMAN Thioredoxin domain_containing protein 17 OS=Homo sapiens GN=TXNDC17 PE=1 SV=1	2	2	22	0.828
	SP://P09960	LKHA4_HUMAN Leukotriene A_4 hydrolase OS=Homo sapiens GN=LTA4H PE=1 SV=2	2	2	9	0.827
	SP://Q9UHD2	TBK1_HUMAN Serine/threonine_protein kinase TBK1 OS=Homo sapiens GN=TBK1 PE=1 SV=1	2	2	2	0.826
	SP://Q14684	RRP1B_HUMAN Ribosomal RNA processing protein 1 homolog B OS=Homo sapiens GN=RRP1B PE=1 SV=3	2	2	5	0.819
	SP://Q9NTI2	AT8A2_HUMAN Probable phospholipid_transporting ATPase IB OS=Homo sapiens GN=ATP8A2 PE=2 SV=2	2	1	2	0.819
	SP://Q9UHD1	CHRD1_HUMAN Cysteine and histidine_rich domain_containing protein 1 OS=Homo sapiens GN=CHORDC1 PE=1 SV=2	2	5	47	0.817
	SP://O75822	EIF3J_HUMAN Eukaryotic translation initiation factor 3 subunit J OS=Homo sapiens GN=EIF3J PE=1 SV=2	2	2	23	0.81
	SP://Q99613	EIF3C_HUMAN Eukaryotic translation initiation factor 3 subunit C OS=Homo sapiens GN=EIF3C PE=1 SV=1	2	3	24	0.808
	SP://P35080	PROF2_HUMAN Profilin_2 OS=Homo sapiens GN=PFN2 PE=1 SV=3	2	3	26	0.802
	SP://Q9Y2K3	MYH15_HUMAN Myosin_15 OS=Homo sapiens GN=MYH15 PE=1 SV=5	2	2	2	0.795
	SP://Q96B97	SH3K1_HUMAN SH3 domain_containing kinase_binding protein 1 OS=Homo sapiens GN=SH3KBP1 PE=1 SV=2	2	2	7	0.787
	SP://Q9BX97	PLVAP_HUMAN Plasmalemma vesicle_associated protein OS=Homo sapiens GN=PLVAP PE=2 SV=1	2	2	19	0.78
	SP://O15372	EIF3H_HUMAN Eukaryotic translation initiation factor 3 subunit H OS=Homo sapiens GN=EIF3H PE=1 SV=1	2	3	14	0.777
	SP://Q8TF64	GIPC3_HUMAN PDZ domain_containing protein GIPC3 OS=Homo sapiens GN=GIPC3 PE=1 SV=1	2	2	6	0.777
	SP://Q15052	ARHG6_HUMAN Rho guanine nucleotide exchange factor 6 OS=Homo sapiens GN=ARHGEF6 PE=1 SV=2	2	2	6	0.77
	SP://Q02790	FKBP4_HUMAN Peptidyl_prolyl cis_trans isomerase FKBP4 OS=Homo sapiens GN=FKBP4 PE=1 SV=3	2	2	26	0.769
	SP://P08107	HSP71_HUMAN Heat shock 70 kDa protein 1A/1B OS=Homo sapiens GN=HSPA1A PE=1 SV=5	2	2	31	0.753
	SP://P34931	HS71L_HUMAN Heat shock 70 kDa protein 1_like OS=Homo sapiens GN=HSPA1L PE=1 SV=2	2	2	31	0.753
	SP://Q6VMQ6	MCAF1_HUMAN Activating transcription factor 7_interacting protein 1 OS=Homo sapiens GN=ATF7IP PE=1 SV=3	2	2	2	0.75
	SP://Q07960	RHG01_HUMAN Rho GTPase_activating protein 1 OS=Homo sapiens GN=ARHGAP1 PE=1 SV=1	2	2	3	0.734
	SP://Q6KC79	NIPBL_HUMAN Nipped_B_like protein OS=Homo sapiens GN=NIPBL PE=1 SV=2	2	3	8	0.725
	SP://P08133	ANXA6_HUMAN Annexin A6 OS=Homo sapiens GN=ANXA6 PE=1 SV=3	2	2	24	0.724
	SP://O15371	EIF3D_HUMAN Eukaryotic translation initiation factor 3 subunit D OS=Homo sapiens GN=EIF3D PE=1 SV=1	2	2	20	0.724
	SP://Q9BZK3	NACP1_HUMAN Putative nascent polypeptide_associated complex subunit alpha_like protein OS=Homo sapiens GN=NACAP1 PE=5 SV=1	2	2	13	0.721
	SP://Q96L73	NSD1_HUMAN Histone_lysine N_methyltransferase_ H3 lysine_36 and H4 lysine_20 specific OS=Homo sapiens GN=NSD1 PE=1 SV=1	2	3	9	0.721
	SP://Q99798	ACON_HUMAN Aconitate hydratase_ mitochondrial OS=Homo sapiens GN=ACO2 PE=1 SV=2	2	2	3	0.716
	SP://P52565	GDIR1_HUMAN Rho GDP_dissociation inhibitor 1 OS=Homo sapiens GN=ARHGDIA PE=1 SV=3	2	3	50	0.712
	SP://Q92833	JARD2_HUMAN Protein Jumonji OS=Homo sapiens GN=JARID2 PE=1 SV=2	2	2	13	0.698
	SP://O75534	CSDE1_HUMAN Cold shock domain_containing protein E1 OS=Homo sapiens GN=CSDE1 PE=1 SV=2	2	2	14	0.693
	SP://Q5VVQ6	OTU1_HUMAN Ubiquitin thioesterase OTU1 OS=Homo sapiens GN=YOD1 PE=1 SV=1	2	4	31	0.69
	SP://P43363	MAGAA_HUMAN Melanoma_associated antigen 10 OS=Homo sapiens GN=MAGEA10 PE=2 SV=2	2	3	31	0.688
	SP://Q9ULL5	PRR12_HUMAN Proline_rich protein 12 OS=Homo sapiens GN=PRR12 PE=1 SV=2	2	2	3	0.683
	SP://P15259	PGAM2_HUMAN Phosphoglycerate mutase 2 OS=Homo sapiens GN=PGAM2 PE=1 SV=3	2	4	47	0.674
	SP://Q8N0Y7	PGAM4_HUMAN Probable phosphoglycerate mutase 4 OS=Homo sapiens GN=PGAM4 PE=1 SV=1	2	4	47	0.674
	SP://Q01469	FABP5_HUMAN Fatty acid_binding protein_ epidermal OS=Homo sapiens GN=FABP5 PE=1 SV=3	2	2	24	0.672
	SP://P28066	PSA5_HUMAN Proteasome subunit alpha type_5 OS=Homo sapiens GN=PSMA5 PE=1 SV=3	2	3	19	0.67
	SP://Q13404	UB2V1_HUMAN Ubiquitin_conjugating enzyme E2 variant 1 OS=Homo sapiens GN=UBE2V1 PE=1 SV=2	2	3	37	0.668
	SP://P26639	SYTC_HUMAN Threonine__tRNA ligase_ cytoplasmic OS=Homo sapiens GN=TARS PE=1 SV=3	2	2	4	0.668
	SP://O60361	NDK8_HUMAN Putative nucleoside diphosphate kinase OS=Homo sapiens GN=NME2P1 PE=5 SV=1	2	6	57	0.664
	SP://P10599	THIO_HUMAN Thioredoxin OS=Homo sapiens GN=TXN PE=1 SV=3	2	2	23	0.634
	SP://Q9NTI5	PDS5B_HUMAN Sister chromatid cohesion protein PDS5 homolog B OS=Homo sapiens GN=PDS5B PE=1 SV=1	2	2	7	0.627
	SP://Q01130	SRSF2_HUMAN Serine/arginine_rich splicing factor 2 OS=Homo sapiens GN=SRSF2 PE=1 SV=4	2	2	13	0.615
	SP://Q9Y4J8	DTNA_HUMAN Dystrobrevin alpha OS=Homo sapiens GN=DTNA PE=1 SV=2	2	4	12	0.612
	SP://P49736	MCM2_HUMAN DNA replication licensing factor MCM2 OS=Homo sapiens GN=MCM2 PE=1 SV=4	2	2	6	0.603
	SP://Q9NX31	CT111_HUMAN Uncharacterized protein C20orf111 OS=Homo sapiens GN=C20orf111 PE=2 SV=2	2	1	2	0.538
	SP://O75170	PP6R2_HUMAN Serine/threonine_protein phosphatase 6 regulatory subunit 2 OS=Homo sapiens GN=PPP6R2 PE=1 SV=2	2	3	21	0.482
	SP://P38646	GRP75_HUMAN Stress_70 protein_ mitochondrial OS=Homo sapiens GN=HSPA9 PE=1 SV=2	2	2	7	0.439
	SP://P23526	SAHH_HUMAN Adenosylhomocysteinase OS=Homo sapiens GN=AHCY PE=1 SV=4	2	3	15	0.398
	SP://P15531	NDKA_HUMAN Nucleoside diphosphate kinase A OS=Homo sapiens GN=NME1 PE=1 SV=1	2	7	73	0.279
	SP://P25788	PSA3_HUMAN Proteasome subunit alpha type_3 OS=Homo sapiens GN=PSMA3 PE=1 SV=2	2	2	17	0.129
	SP://P40925	MDHC_HUMAN Malate dehydrogenase_ cytoplasmic OS=Homo sapiens GN=MDH1 PE=1 SV=4	2	2	18	0.058
	SP://Q01850	CDR2_HUMAN Cerebellar degeneration_related protein 2 OS=Homo sapiens GN=CDR2 PE=1 SV=2	1	1	6	3.254
	SP://O00567	NOP56_HUMAN Nucleolar protein 56 OS=Homo sapiens GN=NOP56 PE=1 SV=4	1	1	2	3.179
	SP://Q16690	DUS5_HUMAN Dual specificity protein phosphatase 5 OS=Homo sapiens GN=DUSP5 PE=1 SV=2	1	1	12	2.801
	SP://Q8TE73	DYH5_HUMAN Dynein heavy chain 5_ axonemal OS=Homo sapiens GN=DNAH5 PE=1 SV=3	1	1	6	2.729
	SP://O60563	CCNT1_HUMAN Cyclin_T1 OS=Homo sapiens GN=CCNT1 PE=1 SV=1	1	1	2	2.729
	SP://O94903	PROSC_HUMAN Proline synthase co_transcribed bacterial homolog protein OS=Homo sapiens GN=PROSC PE=1 SV=1	1	1	2	2.729
	SP://Q9ULT8	HECD1_HUMAN E3 ubiquitin_protein ligase HECTD1 OS=Homo sapiens GN=HECTD1 PE=1 SV=3	1	1	3	2.547
	SP://O60814	H2B1K_HUMAN Histone H2B type 1_K OS=Homo sapiens GN=HIST1H2BK PE=1 SV=3	1	1	7	2.472
	SP://P57053	H2BFS_HUMAN Histone H2B type F_S OS=Homo sapiens GN=H2BFS PE=1 SV=2	1	1	7	2.472
	SP://P58876	H2B1D_HUMAN Histone H2B type 1_D OS=Homo sapiens GN=HIST1H2BD PE=1 SV=2	1	1	7	2.472
	SP://P62807	H2B1C_HUMAN Histone H2B type 1_C/E/F/G/I OS=Homo sapiens GN=HIST1H2BC PE=1 SV=4	1	1	7	2.472
	SP://Q5QNW6	H2B2F_HUMAN Histone H2B type 2_F OS=Homo sapiens GN=HIST2H2BF PE=1 SV=3	1	1	7	2.472
	SP://Q93079	H2B1H_HUMAN Histone H2B type 1_H OS=Homo sapiens GN=HIST1H2BH PE=1 SV=3	1	1	7	2.472
	SP://Q99877	H2B1N_HUMAN Histone H2B type 1_N OS=Homo sapiens GN=HIST1H2BN PE=1 SV=3	1	1	7	2.472
	SP://Q99879	H2B1M_HUMAN Histone H2B type 1_M OS=Homo sapiens GN=HIST1H2BM PE=1 SV=3	1	1	7	2.472
	SP://Q99880	H2B1L_HUMAN Histone H2B type 1_L OS=Homo sapiens GN=HIST1H2BL PE=1 SV=3	1	1	7	2.472
	SP://Q10570	CPSF1_HUMAN Cleavage and polyadenylation specificity factor subunit 1 OS=Homo sapiens GN=CPSF1 PE=1 SV=2	1	2	14	2.45
	SP://Q9NRW1	RAB6B_HUMAN Ras_related protein Rab_6B OS=Homo sapiens GN=RAB6B PE=1 SV=1	1	2	14	2.45
	SP://Q15834	CC85B_HUMAN Coiled_coil domain_containing protein 85B OS=Homo sapiens GN=CCDC85B PE=1 SV=2	1	2	4	2.45
	SP://Q9UJW7	ZN229_HUMAN Zinc finger protein 229 OS=Homo sapiens GN=ZNF229 PE=2 SV=3	1	1	2	2.433
	SP://O75526	RMXL2_HUMAN RNA_binding motif protein_ X_linked_like_2 OS=Homo sapiens GN=RBMXL2 PE=1 SV=3	1	1	20	2.362
	SP://Q8N7X1	RMXL3_HUMAN RNA_binding motif protein_ X_linked_like_3 OS=Homo sapiens GN=RBMXL3 PE=2 SV=2	1	1	20	2.362
	SP://Q01844	EWS_HUMAN RNA_binding protein EWS OS=Homo sapiens GN=EWSR1 PE=1 SV=1	1	1	9	2.326
	SP://Q14566	MCM6_HUMAN DNA replication licensing factor MCM6 OS=Homo sapiens GN=MCM6 PE=1 SV=1	1	1	4	2.315
	SP://Q92544	TM9S4_HUMAN Transmembrane 9 superfamily member 4 OS=Homo sapiens GN=TM9SF4 PE=1 SV=2	1	1	2	2.311
	SP://Q96R30	OR2V2_HUMAN Olfactory receptor 2V2 OS=Homo sapiens GN=OR2V2 PE=2 SV=3	1	1	6	2.31
	SP://P06748	NPM_HUMAN Nucleophosmin OS=Homo sapiens GN=NPM1 PE=1 SV=2	1	3	78	2.277
	SP://Q8IVM7	CM029_HUMAN Putative uncharacterized protein encoded by LINC00346 OS=Homo sapiens GN=LINC00346 PE=5 SV=1	1	1	5	2.266
	SP://Q9Y2C2	UST_HUMAN Uronyl 2_sulfotransferase OS=Homo sapiens GN=UST PE=2 SV=1	1	1	3	2.2
	SP://P25398	RS12_HUMAN 40S ribosomal protein S12 OS=Homo sapiens GN=RPS12 PE=1 SV=3	1	1	21	2.197
	SP://Q96G21	IMP4_HUMAN U3 small nucleolar ribonucleoprotein protein IMP4 OS=Homo sapiens GN=IMP4 PE=1 SV=1	1	1	2	2.173
	SP://O60346	PHLP1_HUMAN PH domain leucine_rich repeat_containing protein phosphatase 1 OS=Homo sapiens GN=PHLPP1 PE=1 SV=3	1	1	4	2.171
	SP://Q9P013	CWC15_HUMAN Protein CWC15 homolog OS=Homo sapiens GN=CWC15 PE=1 SV=2	1	1	2	2.171
	SP://P20962	PTMS_HUMAN Parathymosin OS=Homo sapiens GN=PTMS PE=1 SV=2	1	1	22	2.101
	SP://Q9HAW4	CLSPN_HUMAN Claspin OS=Homo sapiens GN=CLSPN PE=1 SV=3	1	1	4	2.044
	SP://O14594	NCAN_HUMAN Neurocan core protein OS=Homo sapiens GN=NCAN PE=2 SV=3	1	1	2	2.044
	SP://O43309	ZSC12_HUMAN Zinc finger and SCAN domain_containing protein 12 OS=Homo sapiens GN=ZSCAN12 PE=2 SV=1	1	1	2	2.032
	SP://P84103	SRSF3_HUMAN Serine/arginine_rich splicing factor 3 OS=Homo sapiens GN=SRSF3 PE=1 SV=1	1	2	7	1.955
	SP://Q7LBC6	KDM3B_HUMAN Lysine_specific demethylase 3B OS=Homo sapiens GN=KDM3B PE=1 SV=2	1	2	9	1.904
	SP://Q09028	RBBP4_HUMAN Histone_binding protein RBBP4 OS=Homo sapiens GN=RBBP4 PE=1 SV=3	1	1	6	1.903
	SP://Q16576	RBBP7_HUMAN Histone_binding protein RBBP7 OS=Homo sapiens GN=RBBP7 PE=1 SV=1	1	1	6	1.903
	SP://Q13111	CAF1A_HUMAN Chromatin assembly factor 1 subunit A OS=Homo sapiens GN=CHAF1A PE=1 SV=2	1	1	4	1.886
	SP://P04908	H2A1B_HUMAN Histone H2A type 1_B/E OS=Homo sapiens GN=HIST1H2AB PE=1 SV=2	1	1	5	1.87
	SP://P0C0S5	H2AZ_HUMAN Histone H2A.Z OS=Homo sapiens GN=H2AFZ PE=1 SV=2	1	1	5	1.87
	SP://P16104	H2AX_HUMAN Histone H2A.x OS=Homo sapiens GN=H2AFX PE=1 SV=2	1	1	5	1.87
	SP://Q71UI9	H2AV_HUMAN Histone H2A.V OS=Homo sapiens GN=H2AFV PE=1 SV=3	1	1	5	1.87
	SP://Q7L7L0	H2A3_HUMAN Histone H2A type 3 OS=Homo sapiens GN=HIST3H2A PE=1 SV=3	1	1	5	1.87
	SP://Q8IUE6	H2A2B_HUMAN Histone H2A type 2_B OS=Homo sapiens GN=HIST2H2AB PE=1 SV=3	1	1	5	1.87
	SP://Q93077	H2A1C_HUMAN Histone H2A type 1_C OS=Homo sapiens GN=HIST1H2AC PE=1 SV=3	1	1	5	1.87
	SP://Q96QV6	H2A1A_HUMAN Histone H2A type 1_A OS=Homo sapiens GN=HIST1H2AA PE=1 SV=3	1	1	5	1.87
	SP://Q86X76	NIT1_HUMAN Nitrilase homolog 1 OS=Homo sapiens GN=NIT1 PE=1 SV=2	1	1	3	1.863
	SP://Q7Z3J2	CP062_HUMAN UPF0505 protein C16orf62 OS=Homo sapiens GN=C16orf62 PE=1 SV=2	1	1	5	1.85
	SP://Q9Y2W1	TR150_HUMAN Thyroid hormone receptor_associated protein 3 OS=Homo sapiens GN=THRAP3 PE=1 SV=2	1	1	7	1.842
	SP://O94910	LPHN1_HUMAN Latrophilin_1 OS=Homo sapiens GN=LPHN1 PE=1 SV=1	1	1	8	1.818
	SP://Q9H0E3	SP130_HUMAN Histone deacetylase complex subunit SAP130 OS=Homo sapiens GN=SAP130 PE=1 SV=1	1	2	2	1.783
	SP://P31314	TLX1_HUMAN T_cell leukemia homeobox protein 1 OS=Homo sapiens GN=TLX1 PE=1 SV=1	1	1	3	1.769
	SP://P46782	RS5_HUMAN 40S ribosomal protein S5 OS=Homo sapiens GN=RPS5 PE=1 SV=4	1	1	4	1.768
	SP://Q8N6Y2	LRC17_HUMAN Leucine_rich repeat_containing protein 17 OS=Homo sapiens GN=LRRC17 PE=2 SV=1	1	1	2	1.757
	SP://Q96SI9	STRBP_HUMAN Spermatid perinuclear RNA_binding protein OS=Homo sapiens GN=STRBP PE=1 SV=1	1	1	11	1.75
	SP://A8MT19	RHN2L_HUMAN Putative rhophilin_2_like protein OS=Homo sapiens PE=5 SV=2	1	2	4	1.748
	SP://B2RV13	CQ105_HUMAN Uncharacterized protein C17orf105 OS=Homo sapiens GN=C17orf105 PE=2 SV=1	1	1	2	1.716
	SP://Q8NFD5	ARI1B_HUMAN AT_rich interactive domain_containing protein 1B OS=Homo sapiens GN=ARID1B PE=1 SV=2	1	1	6	1.692
	SP://Q96C03	MID49_HUMAN Mitochondrial dynamic protein MID49 OS=Homo sapiens GN=SMCR7 PE=1 SV=1	1	1	2	1.692
	SP://Q15024	EXOS7_HUMAN Exosome complex component RRP42 OS=Homo sapiens GN=EXOSC7 PE=1 SV=3	1	1	5	1.682
	SP://Q9C0J9	BHE41_HUMAN Class E basic helix_loop_helix protein 41 OS=Homo sapiens GN=BHLHE41 PE=2 SV=1	1	1	2	1.678
	SP://Q96AE4	FUBP1_HUMAN Far upstream element_binding protein 1 OS=Homo sapiens GN=FUBP1 PE=1 SV=3	1	2	18	1.676
	SP://Q9Y613	FHOD1_HUMAN FH1/FH2 domain_containing protein 1 OS=Homo sapiens GN=FHOD1 PE=1 SV=3	1	1	4	1.668
	SP://P55769	NH2L1_HUMAN NHP2_like protein 1 OS=Homo sapiens GN=NHP2L1 PE=1 SV=3	1	1	22	1.66
	SP://P18850	ATF6A_HUMAN Cyclic AMP_dependent transcription factor ATF_6 alpha OS=Homo sapiens GN=ATF6 PE=1 SV=3	1	1	4	1.659
	SP://P09493	TPM1_HUMAN Tropomyosin alpha_1 chain OS=Homo sapiens GN=TPM1 PE=1 SV=2	1	2	23	1.638
	SP://Q8IWX7	UN45B_HUMAN Protein unc_45 homolog B OS=Homo sapiens GN=UNC45B PE=2 SV=1	1	2	2	1.638
	SP://Q9Y3C6	PPIL1_HUMAN Peptidyl_prolyl cis_trans isomerase_like 1 OS=Homo sapiens GN=PPIL1 PE=1 SV=1	1	1	3	1.624
	SP://P29536	LMOD1_HUMAN Leiomodin_1 OS=Homo sapiens GN=LMOD1 PE=1 SV=3	1	1	2	1.624
	SP://P01130	LDLR_HUMAN Low_density lipoprotein receptor OS=Homo sapiens GN=LDLR PE=1 SV=1	1	1	2	1.623
	SP://Q8WWQ8	STAB2_HUMAN Stabilin_2 OS=Homo sapiens GN=STAB2 PE=1 SV=3	1	1	7	1.618
	SP://Q9H254	SPTN4_HUMAN Spectrin beta chain_ brain 3 OS=Homo sapiens GN=SPTBN4 PE=1 SV=2	1	1	3	1.618
	SP://O43447	PPIH_HUMAN Peptidyl_prolyl cis_trans isomerase H OS=Homo sapiens GN=PPIH PE=1 SV=1	1	1	13	1.617
	SP://Q14324	MYPC2_HUMAN Myosin_binding protein C_ fast_type OS=Homo sapiens GN=MYBPC2 PE=1 SV=2	1	1	6	1.617
	SP://Q5VTT5	MYOM3_HUMAN Myomesin_3 OS=Homo sapiens GN=MYOM3 PE=2 SV=1	1	1	4	1.616
	SP://Q9H4H8	FA83D_HUMAN Protein FAM83D OS=Homo sapiens GN=FAM83D PE=1 SV=3	1	1	14	1.615
	SP://Q13342	LY10_HUMAN Nuclear body protein SP140 OS=Homo sapiens GN=SP140 PE=2 SV=2	1	1	6	1.607
	SP://Q9H930	LY10L_HUMAN Nuclear body protein SP140_like protein OS=Homo sapiens GN=SP140L PE=2 SV=3	1	1	6	1.607
	SP://Q8NAG6	ANKL1_HUMAN Ankyrin repeat and LEM domain_containing protein 1 OS=Homo sapiens GN=ANKLE1 PE=2 SV=2	1	1	2	1.596
	SP://P62304	RUXE_HUMAN Small nuclear ribonucleoprotein E OS=Homo sapiens GN=SNRPE PE=1 SV=1	1	2	22	1.576
	SP://P35580	MYH10_HUMAN Myosin_10 OS=Homo sapiens GN=MYH10 PE=1 SV=3	1	2	7	1.571
	SP://P25786	PSA1_HUMAN Proteasome subunit alpha type_1 OS=Homo sapiens GN=PSMA1 PE=1 SV=1	1	1	6	1.57
	SP://P26599	PTBP1_HUMAN Polypyrimidine tract_binding protein 1 OS=Homo sapiens GN=PTBP1 PE=1 SV=1	1	1	6	1.57
	SP://Q99550	MPP9_HUMAN M_phase phosphoprotein 9 OS=Homo sapiens GN=MPHOSPH9 PE=1 SV=3	1	1	3	1.564
	SP://A6NJ88	SGE1L_HUMAN Putative SAGE1_like protein OS=Homo sapiens PE=5 SV=4	1	1	2	1.559
	SP://P41162	ETV3_HUMAN ETS translocation variant 3 OS=Homo sapiens GN=ETV3 PE=1 SV=2	1	1	5	1.556
	SP://P50548	ERF_HUMAN ETS domain_containing transcription factor ERF OS=Homo sapiens GN=ERF PE=1 SV=2	1	1	5	1.556
	SP://Q6ZN32	ETV3L_HUMAN ETS translocation variant 3_like protein OS=Homo sapiens GN=ETV3L PE=2 SV=1	1	1	5	1.556
	SP://Q12912	LRMP_HUMAN Lymphoid_restricted membrane protein OS=Homo sapiens GN=LRMP PE=1 SV=3	1	2	2	1.55
	SP://O94810	RGS11_HUMAN Regulator of G_protein signaling 11 OS=Homo sapiens GN=RGS11 PE=1 SV=2	1	1	3	1.548
	SP://O75146	HIP1R_HUMAN Huntingtin_interacting protein 1_related protein OS=Homo sapiens GN=HIP1R PE=1 SV=2	1	1	2	1.548
	SP://O43847	NRDC_HUMAN Nardilysin OS=Homo sapiens GN=NRD1 PE=1 SV=2	1	1	3	1.545
	SP://Q8N130	NPT2C_HUMAN Sodium_dependent phosphate transport protein 2C OS=Homo sapiens GN=SLC34A3 PE=1 SV=2	1	1	7	1.544
	SP://Q6ZTA4	TRI67_HUMAN Tripartite motif_containing protein 67 OS=Homo sapiens GN=TRIM67 PE=2 SV=3	1	1	2	1.543
	SP://P09874	PARP1_HUMAN Poly [ADP_ribose] polymerase 1 OS=Homo sapiens GN=PARP1 PE=1 SV=4	1	1	7	1.536
	SP://Q9P244	LRFN1_HUMAN Leucine_rich repeat and fibronectin type III domain_containing protein 1 OS=Homo sapiens GN=LRFN1 PE=1 SV=2	1	1	4	1.532
	SP://O00161	SNP23_HUMAN Synaptosomal_associated protein 23 OS=Homo sapiens GN=SNAP23 PE=1 SV=1	1	1	4	1.516
	SP://Q9NW82	WDR70_HUMAN WD repeat_containing protein 70 OS=Homo sapiens GN=WDR70 PE=1 SV=1	1	1	6	1.515
	SP://Q9HAQ2	KIF9_HUMAN Kinesin_like protein KIF9 OS=Homo sapiens GN=KIF9 PE=1 SV=4	1	1	2	1.503
	SP://Q9H0W8	SMG9_HUMAN Protein SMG9 OS=Homo sapiens GN=SMG9 PE=1 SV=1	1	1	4	1.502
	SP://Q9Y3R5	DOP2_HUMAN Protein dopey_2 OS=Homo sapiens GN=DOPEY2 PE=1 SV=5	1	2	2	1.499
	SP://Q12982	BNIP2_HUMAN BCL2/adenovirus E1B 19 kDa protein_interacting protein 2 OS=Homo sapiens GN=BNIP2 PE=1 SV=1	1	1	3	1.496
	SP://P28482	MK01_HUMAN Mitogen_activated protein kinase 1 OS=Homo sapiens GN=MAPK1 PE=1 SV=3	1	1	5	1.495
	SP://P51149	RAB7A_HUMAN Ras_related protein Rab_7a OS=Homo sapiens GN=RAB7A PE=1 SV=1	1	1	7	1.49
	SP://Q9NS39	RED2_HUMAN Double_stranded RNA_specific editase B2 OS=Homo sapiens GN=ADARB2 PE=1 SV=1	1	1	6	1.49
	SP://P40429	RL13A_HUMAN 60S ribosomal protein L13a OS=Homo sapiens GN=RPL13A PE=1 SV=2	1	1	20	1.479
	SP://Q6NVV1	R13AX_HUMAN Putative 60S ribosomal protein L13a_like MGC87657 OS=Homo sapiens PE=5 SV=1	1	1	20	1.479
	SP://A6NC57	ANR62_HUMAN Ankyrin repeat domain_containing protein 62 OS=Homo sapiens GN=ANKRD62 PE=2 SV=4	1	1	2	1.476
	SP://P35637	FUS_HUMAN RNA_binding protein FUS OS=Homo sapiens GN=FUS PE=1 SV=1	1	2	25	1.475
	SP://Q76FK4	NOL8_HUMAN Nucleolar protein 8 OS=Homo sapiens GN=NOL8 PE=1 SV=1	1	2	5	1.473
	SP://Q96B18	DACT3_HUMAN Dapper homolog 3 OS=Homo sapiens GN=DACT3 PE=2 SV=2	1	1	2	1.464
	SP://Q6Y7W6	PERQ2_HUMAN PERQ amino acid_rich with GYF domain_containing protein 2 OS=Homo sapiens GN=GIGYF2 PE=1 SV=1	1	1	6	1.458
	SP://Q9UD71	PPR1B_HUMAN Protein phosphatase 1 regulatory subunit 1B OS=Homo sapiens GN=PPP1R1B PE=1 SV=2	1	1	4	1.458
	SP://Q9Y2L5	TPPC8_HUMAN Trafficking protein particle complex subunit 8 OS=Homo sapiens GN=TRAPPC8 PE=1 SV=2	1	1	2	1.456
	SP://Q16763	UBE2S_HUMAN Ubiquitin_conjugating enzyme E2 S OS=Homo sapiens GN=UBE2S PE=1 SV=2	1	1	12	1.452
	SP://Q496J9	SV2C_HUMAN Synaptic vesicle glycoprotein 2C OS=Homo sapiens GN=SV2C PE=2 SV=1	1	1	2	1.45
	SP://O14618	CCS_HUMAN Copper chaperone for superoxide dismutase OS=Homo sapiens GN=CCS PE=1 SV=1	1	1	2	1.447
	SP://P51991	ROA3_HUMAN Heterogeneous nuclear ribonucleoprotein A3 OS=Homo sapiens GN=HNRNPA3 PE=1 SV=2	1	2	10	1.442
	SP://P61758	PFD3_HUMAN Prefoldin subunit 3 OS=Homo sapiens GN=VBP1 PE=1 SV=3	1	1	3	1.442
	SP://P33991	MCM4_HUMAN DNA replication licensing factor MCM4 OS=Homo sapiens GN=MCM4 PE=1 SV=5	1	1	9	1.437
	SP://O43166	SI1L1_HUMAN Signal_induced proliferation_associated 1_like protein 1 OS=Homo sapiens GN=SIPA1L1 PE=1 SV=4	1	1	4	1.435
	SP://Q7Z3T8	ZFY16_HUMAN Zinc finger FYVE domain_containing protein 16 OS=Homo sapiens GN=ZFYVE16 PE=1 SV=3	1	2	6	1.43
	SP://P38117	ETFB_HUMAN Electron transfer flavoprotein subunit beta OS=Homo sapiens GN=ETFB PE=1 SV=3	1	1	5	1.426
	SP://A8MW92	P20L1_HUMAN PHD finger protein 20_like protein 1 OS=Homo sapiens GN=PHF20L1 PE=1 SV=2	1	1	7	1.425
	SP://A8MWD9	RUXGL_HUMAN Small nuclear ribonucleoprotein G_like protein OS=Homo sapiens PE=3 SV=2	1	1	23	1.424
	SP://P62308	RUXG_HUMAN Small nuclear ribonucleoprotein G OS=Homo sapiens GN=SNRPG PE=1 SV=1	1	1	23	1.424
	SP://P54687	BCAT1_HUMAN Branched_chain_amino_acid aminotransferase_ cytosolic OS=Homo sapiens GN=BCAT1 PE=1 SV=3	1	1	20	1.424
	SP://Q9NZL4	HPBP1_HUMAN Hsp70_binding protein 1 OS=Homo sapiens GN=HSPBP1 PE=1 SV=1	1	1	6	1.423
	SP://P06730	IF4E_HUMAN Eukaryotic translation initiation factor 4E OS=Homo sapiens GN=EIF4E PE=1 SV=2	1	1	8	1.42
	SP://O43396	TXNL1_HUMAN Thioredoxin_like protein 1 OS=Homo sapiens GN=TXNL1 PE=1 SV=3	1	1	6	1.42
	SP://Q8IYE0	CC146_HUMAN Coiled_coil domain_containing protein 146 OS=Homo sapiens GN=CCDC146 PE=2 SV=2	1	1	5	1.42
	SP://Q7L775	EPMIP_HUMAN EPM2A_interacting protein 1 OS=Homo sapiens GN=EPM2AIP1 PE=1 SV=1	1	1	2	1.419
	SP://Q08493	PDE4C_HUMAN cAMP_specific 3__5__cyclic phosphodiesterase 4C OS=Homo sapiens GN=PDE4C PE=1 SV=2	1	1	2	1.412
	SP://P61086	UBE2K_HUMAN Ubiquitin_conjugating enzyme E2 K OS=Homo sapiens GN=UBE2K PE=1 SV=3	1	1	10	1.4
	SP://Q9BSU3	NAA11_HUMAN N_alpha_acetyltransferase 11 OS=Homo sapiens GN=NAA11 PE=1 SV=3	1	2	4	1.395
	SP://P09936	UCHL1_HUMAN Ubiquitin carboxyl_terminal hydrolase isozyme L1 OS=Homo sapiens GN=UCHL1 PE=1 SV=2	1	1	5	1.389
	SP://P51172	SCNND_HUMAN Amiloride_sensitive sodium channel subunit delta OS=Homo sapiens GN=SCNN1D PE=1 SV=2	1	1	3	1.389
	SP://A8MT70	ZBBX_HUMAN Zinc finger B_box domain_containing protein 1 OS=Homo sapiens GN=ZBBX PE=2 SV=3	1	1	4	1.388
	SP://P23468	PTPRD_HUMAN Receptor_type tyrosine_protein phosphatase delta OS=Homo sapiens GN=PTPRD PE=1 SV=2	1	1	2	1.388
	SP://Q13332	PTPRS_HUMAN Receptor_type tyrosine_protein phosphatase S OS=Homo sapiens GN=PTPRS PE=1 SV=3	1	1	2	1.388
	SP://Q9UKD2	MRT4_HUMAN mRNA turnover protein 4 homolog OS=Homo sapiens GN=MRTO4 PE=1 SV=2	1	1	2	1.387
	SP://P98171	RHG04_HUMAN Rho GTPase_activating protein 4 OS=Homo sapiens GN=ARHGAP4 PE=1 SV=2	1	1	3	1.386
	SP://Q5HYI8	RABL3_HUMAN Rab_like protein 3 OS=Homo sapiens GN=RABL3 PE=1 SV=1	1	1	3	1.381
	SP://Q86WV6	TM173_HUMAN Transmembrane protein 173 OS=Homo sapiens GN=TMEM173 PE=1 SV=1	1	1	2	1.378
	SP://P43487	RANG_HUMAN Ran_specific GTPase_activating protein OS=Homo sapiens GN=RANBP1 PE=1 SV=1	1	1	23	1.376
	SP://Q52LJ0	FA98B_HUMAN Protein FAM98B OS=Homo sapiens GN=FAM98B PE=1 SV=1	1	1	10	1.376
	SP://Q8NCA5	FA98A_HUMAN Protein FAM98A OS=Homo sapiens GN=FAM98A PE=1 SV=1	1	1	10	1.376
	SP://Q8N7B9	EFCB3_HUMAN EF_hand calcium_binding domain_containing protein 3 OS=Homo sapiens GN=EFCAB3 PE=1 SV=1	1	1	6	1.373
	SP://O60292	SI1L3_HUMAN Signal_induced proliferation_associated 1_like protein 3 OS=Homo sapiens GN=SIPA1L3 PE=1 SV=3	1	1	5	1.373
	SP://A2A2Z9	AN18B_HUMAN Ankyrin repeat domain_containing protein 18B OS=Homo sapiens GN=ANKRD18B PE=2 SV=1	1	1	2	1.373
	SP://Q92538	GBF1_HUMAN Golgi_specific brefeldin A_resistance guanine nucleotide exchange factor 1 OS=Homo sapiens GN=GBF1 PE=1 SV=2	1	1	27	1.37
	SP://Q15691	MARE1_HUMAN Microtubule_associated protein RP/EB family member 1 OS=Homo sapiens GN=MAPRE1 PE=1 SV=3	1	1	3	1.367
	SP://P55145	MANF_HUMAN Mesencephalic astrocyte_derived neurotrophic factor OS=Homo sapiens GN=MANF PE=1 SV=3	1	1	2	1.352
	SP://O00327	BMAL1_HUMAN Aryl hydrocarbon receptor nuclear translocator_like protein 1 OS=Homo sapiens GN=ARNTL PE=1 SV=2	1	2	20	1.35
	SP://P61313	RL15_HUMAN 60S ribosomal protein L15 OS=Homo sapiens GN=RPL15 PE=1 SV=2	1	2	23	1.346
	SP://P62244	RS15A_HUMAN 40S ribosomal protein S15a OS=Homo sapiens GN=RPS15A PE=1 SV=2	1	2	32	1.344
	SP://O14602	IF1AY_HUMAN Eukaryotic translation initiation factor 1A_ Y_chromosomal OS=Homo sapiens GN=EIF1AY PE=1 SV=4	1	1	2	1.343
	SP://P47813	IF1AX_HUMAN Eukaryotic translation initiation factor 1A_ X_chromosomal OS=Homo sapiens GN=EIF1AX PE=1 SV=2	1	1	2	1.343
	SP://Q8N9V7	TOPZ1_HUMAN Testis_ and ovary_specific PAZ domain_containing protein 1 OS=Homo sapiens GN=TOPAZ1 PE=2 SV=3	1	2	2	1.341
	SP://O00425	IF2B3_HUMAN Insulin_like growth factor 2 mRNA_binding protein 3 OS=Homo sapiens GN=IGF2BP3 PE=1 SV=2	1	1	3	1.336
	SP://Q9NZI8	IF2B1_HUMAN Insulin_like growth factor 2 mRNA_binding protein 1 OS=Homo sapiens GN=IGF2BP1 PE=1 SV=2	1	1	3	1.336
	SP://Q9Y6M1	IF2B2_HUMAN Insulin_like growth factor 2 mRNA_binding protein 2 OS=Homo sapiens GN=IGF2BP2 PE=1 SV=2	1	1	3	1.336
	SP://O75828	CBR3_HUMAN Carbonyl reductase [NADPH] 3 OS=Homo sapiens GN=CBR3 PE=1 SV=3	1	2	17	1.331
	SP://P16152	CBR1_HUMAN Carbonyl reductase [NADPH] 1 OS=Homo sapiens GN=CBR1 PE=1 SV=3	1	2	17	1.331
	SP://P68431	H31_HUMAN Histone H3.1 OS=Homo sapiens GN=HIST1H3A PE=1 SV=2	1	2	2	1.331
	SP://P84243	H33_HUMAN Histone H3.3 OS=Homo sapiens GN=H3F3A PE=1 SV=2	1	2	2	1.331
	SP://Q16695	H31T_HUMAN Histone H3.1t OS=Homo sapiens GN=HIST3H3 PE=1 SV=3	1	2	2	1.331
	SP://Q6NXT2	H3C_HUMAN Histone H3.3C OS=Homo sapiens GN=H3F3C PE=1 SV=3	1	2	2	1.331
	SP://Q71DI3	H32_HUMAN Histone H3.2 OS=Homo sapiens GN=HIST2H3A PE=1 SV=3	1	2	2	1.331
	SP://P17480	UBF1_HUMAN Nucleolar transcription factor 1 OS=Homo sapiens GN=UBTF PE=1 SV=1	1	1	5	1.328
	SP://Q8TAL5	CI043_HUMAN Uncharacterized protein C9orf43 OS=Homo sapiens GN=C9orf43 PE=1 SV=1	1	1	3	1.324
	SP://P61158	ARP3_HUMAN Actin_related protein 3 OS=Homo sapiens GN=ACTR3 PE=1 SV=3	1	1	2	1.322
	SP://Q6PCB5	RSBNL_HUMAN Round spermatid basic protein 1_like protein OS=Homo sapiens GN=RSBN1L PE=1 SV=2	1	1	3	1.318
	SP://O95948	ONEC2_HUMAN One cut domain family member 2 OS=Homo sapiens GN=ONECUT2 PE=2 SV=2	1	1	6	1.317
	SP://Q66K74	MAP1S_HUMAN Microtubule_associated protein 1S OS=Homo sapiens GN=MAP1S PE=1 SV=2	1	1	4	1.317
	SP://Q7Z6J8	UBE3D_HUMAN E3 ubiquitin_protein ligase E3D OS=Homo sapiens GN=UBE3D PE=1 SV=2	1	1	3	1.317
	SP://A8MTB9	CEA18_HUMAN Carcinoembryonic antigen_related cell adhesion molecule 18 OS=Homo sapiens GN=CEACAM18 PE=2 SV=3	1	2	10	1.306
	SP://P17655	CAN2_HUMAN Calpain_2 catalytic subunit OS=Homo sapiens GN=CAPN2 PE=1 SV=6	1	1	10	1.306
	SP://Q9NR09	BIRC6_HUMAN Baculoviral IAP repeat_containing protein 6 OS=Homo sapiens GN=BIRC6 PE=1 SV=2	1	1	2	1.301
	SP://Q8N5R6	CCD33_HUMAN Coiled_coil domain_containing protein 33 OS=Homo sapiens GN=CCDC33 PE=1 SV=3	1	1	2	1.301
	SP://Q9UBQ0	VPS29_HUMAN Vacuolar protein sorting_associated protein 29 OS=Homo sapiens GN=VPS29 PE=1 SV=1	1	1	16	1.297
	SP://Q8IXS6	PALM2_HUMAN Paralemmin_2 OS=Homo sapiens GN=PALM2 PE=1 SV=3	1	1	2	1.297
	SP://Q15084	PDIA6_HUMAN Protein disulfide_isomerase A6 OS=Homo sapiens GN=PDIA6 PE=1 SV=1	1	1	6	1.288
	SP://Q8N0W3	FUK_HUMAN L_fucose kinase OS=Homo sapiens GN=FUK PE=2 SV=2	1	1	18	1.285
	SP://Q9NY97	B3GN2_HUMAN UDP_GlcNAc:betaGal beta_1_3_N_acetylglucosaminyltransferase 2 OS=Homo sapiens GN=B3GNT2 PE=1 SV=2	1	1	6	1.285
	SP://P56705	WNT4_HUMAN Protein Wnt_4 OS=Homo sapiens GN=WNT4 PE=1 SV=4	1	2	5	1.283
	SP://Q6N069	NAA16_HUMAN N_alpha_acetyltransferase 16_ NatA auxiliary subunit OS=Homo sapiens GN=NAA16 PE=1 SV=2	1	1	9	1.282
	SP://P20338	RAB4A_HUMAN Ras_related protein Rab_4A OS=Homo sapiens GN=RAB4A PE=1 SV=2	1	1	13	1.281
	SP://Q6PGP7	TTC37_HUMAN Tetratricopeptide repeat protein 37 OS=Homo sapiens GN=TTC37 PE=1 SV=1	1	1	3	1.272
	SP://A6NL28	TPM3L_HUMAN Putative tropomyosin alpha_3 chain_like protein OS=Homo sapiens PE=5 SV=2	1	1	24	1.271
	SP://Q9Y267	S22AE_HUMAN Solute carrier family 22 member 14 OS=Homo sapiens GN=SLC22A14 PE=2 SV=4	1	1	3	1.271
	SP://Q9BUJ2	HNRL1_HUMAN Heterogeneous nuclear ribonucleoprotein U_like protein 1 OS=Homo sapiens GN=HNRNPUL1 PE=1 SV=2	1	2	10	1.268
	SP://Q9Y224	CN166_HUMAN UPF0568 protein C14orf166 OS=Homo sapiens GN=C14orf166 PE=1 SV=1	1	1	6	1.267
	SP://A6H8M9	CDHR4_HUMAN Cadherin_related family member 4 OS=Homo sapiens GN=CDHR4 PE=2 SV=1	1	1	2	1.263
	SP://P14866	HNRPL_HUMAN Heterogeneous nuclear ribonucleoprotein L OS=Homo sapiens GN=HNRNPL PE=1 SV=2	1	2	21	1.257
	SP://Q14168	MPP2_HUMAN MAGUK p55 subfamily member 2 OS=Homo sapiens GN=MPP2 PE=1 SV=3	1	1	25	1.254
	SP://Q8IYW4	ENTD1_HUMAN ENTH domain_containing protein 1 OS=Homo sapiens GN=ENTHD1 PE=2 SV=1	1	1	20	1.254
	SP://Q16787	LAMA3_HUMAN Laminin subunit alpha_3 OS=Homo sapiens GN=LAMA3 PE=1 SV=2	1	1	9	1.254
	SP://Q9UKX3	MYH13_HUMAN Myosin_13 OS=Homo sapiens GN=MYH13 PE=1 SV=2	1	1	5	1.254
	SP://Q6ZTY8	CL063_HUMAN Putative uncharacterized protein C12orf63 OS=Homo sapiens GN=C12orf63 PE=2 SV=2	1	1	2	1.25
	SP://Q969H8	CS010_HUMAN UPF0556 protein C19orf10 OS=Homo sapiens GN=C19orf10 PE=1 SV=1	1	2	11	1.249
	SP://P14649	MYL6B_HUMAN Myosin light chain 6B OS=Homo sapiens GN=MYL6B PE=1 SV=1	1	1	20	1.247
	SP://Q9BTA0	F167B_HUMAN Protein FAM167B OS=Homo sapiens GN=FAM167B PE=2 SV=2	1	1	2	1.243
	SP://Q68EM7	RHG17_HUMAN Rho GTPase_activating protein 17 OS=Homo sapiens GN=ARHGAP17 PE=1 SV=1	1	1	3	1.242
	SP://Q8IVL1	NAV2_HUMAN Neuron navigator 2 OS=Homo sapiens GN=NAV2 PE=1 SV=3	1	1	6	1.241
	SP://O60573	IF4E2_HUMAN Eukaryotic translation initiation factor 4E type 2 OS=Homo sapiens GN=EIF4E2 PE=1 SV=1	1	1	2	1.241
	SP://Q9NTX7	RN146_HUMAN E3 ubiquitin_protein ligase RNF146 OS=Homo sapiens GN=RNF146 PE=1 SV=1	1	1	3	1.237
	SP://Q9NRF9	DPOE3_HUMAN DNA polymerase epsilon subunit 3 OS=Homo sapiens GN=POLE3 PE=1 SV=1	1	1	8	1.236
	SP://Q9Y5K5	UCHL5_HUMAN Ubiquitin carboxyl_terminal hydrolase isozyme L5 OS=Homo sapiens GN=UCHL5 PE=1 SV=3	1	1	7	1.23
	SP://Q6ZMU1	C3P1_HUMAN Putative protein C3P1 OS=Homo sapiens GN=C3P1 PE=5 SV=3	1	1	2	1.229
	SP://P61326	MGN_HUMAN Protein mago nashi homolog OS=Homo sapiens GN=MAGOH PE=1 SV=1	1	1	11	1.227
	SP://Q96A72	MGN2_HUMAN Protein mago nashi homolog 2 OS=Homo sapiens GN=MAGOHB PE=1 SV=1	1	1	11	1.227
	SP://Q96D46	NMD3_HUMAN 60S ribosomal export protein NMD3 OS=Homo sapiens GN=NMD3 PE=1 SV=1	1	1	2	1.227
	SP://P07858	CATB_HUMAN Cathepsin B OS=Homo sapiens GN=CTSB PE=1 SV=3	1	1	3	1.225
	SP://Q9P2D7	DYH1_HUMAN Dynein heavy chain 1_ axonemal OS=Homo sapiens GN=DNAH1 PE=1 SV=4	1	1	5	1.222
	SP://P63313	TYB10_HUMAN Thymosin beta_10 OS=Homo sapiens GN=TMSB10 PE=1 SV=2	1	1	16	1.219
	SP://P0C091	FREM3_HUMAN FRAS1_related extracellular matrix protein 3 OS=Homo sapiens GN=FREM3 PE=2 SV=2	1	2	2	1.219
	SP://P36543	VATE1_HUMAN V_type proton ATPase subunit E 1 OS=Homo sapiens GN=ATP6V1E1 PE=1 SV=1	1	1	8	1.215
	SP://Q7Z4Q2	HEAT3_HUMAN HEAT repeat_containing protein 3 OS=Homo sapiens GN=HEATR3 PE=1 SV=2	1	1	4	1.214
	SP://Q6UW60	PCSK4_HUMAN Proprotein convertase subtilisin/kexin type 4 OS=Homo sapiens GN=PCSK4 PE=2 SV=2	1	1	2	1.211
	SP://Q8TEX9	IPO4_HUMAN Importin_4 OS=Homo sapiens GN=IPO4 PE=1 SV=2	1	1	3	1.207
	SP://Q9H093	NUAK2_HUMAN NUAK family SNF1_like kinase 2 OS=Homo sapiens GN=NUAK2 PE=1 SV=1	1	1	4	1.202
	SP://O43149	ZZEF1_HUMAN Zinc finger ZZ_type and EF_hand domain_containing protein 1 OS=Homo sapiens GN=ZZEF1 PE=1 SV=6	1	1	2	1.202
	SP://O75943	RAD17_HUMAN Cell cycle checkpoint protein RAD17 OS=Homo sapiens GN=RAD17 PE=1 SV=2	1	1	2	1.202
	SP://O75376	NCOR1_HUMAN Nuclear receptor corepressor 1 OS=Homo sapiens GN=NCOR1 PE=1 SV=2	1	1	2	1.201
	SP://Q9NQI0	DDX4_HUMAN Probable ATP_dependent RNA helicase DDX4 OS=Homo sapiens GN=DDX4 PE=2 SV=2	1	1	21	1.199
	SP://P62829	RL23_HUMAN 60S ribosomal protein L23 OS=Homo sapiens GN=RPL23 PE=1 SV=1	1	4	45	1.193
	SP://O94985	CSTN1_HUMAN Calsyntenin_1 OS=Homo sapiens GN=CLSTN1 PE=1 SV=1	1	1	4	1.193
	SP://Q9Y237	PIN4_HUMAN Peptidyl_prolyl cis_trans isomerase NIMA_interacting 4 OS=Homo sapiens GN=PIN4 PE=1 SV=1	1	3	11	1.191
	SP://O95359	TACC2_HUMAN Transforming acidic coiled_coil_containing protein 2 OS=Homo sapiens GN=TACC2 PE=1 SV=3	1	2	2	1.191
	SP://Q2TB90	HKDC1_HUMAN Putative hexokinase HKDC1 OS=Homo sapiens GN=HKDC1 PE=2 SV=3	1	1	2	1.189
	SP://Q2V2M9	FHOD3_HUMAN FH1/FH2 domain_containing protein 3 OS=Homo sapiens GN=FHOD3 PE=1 SV=2	1	1	15	1.188
	SP://Q9H9L3	I20L2_HUMAN Interferon_stimulated 20 kDa exonuclease_like 2 OS=Homo sapiens GN=ISG20L2 PE=1 SV=1	1	1	4	1.185
	SP://Q86XJ1	GA2L3_HUMAN GAS2_like protein 3 OS=Homo sapiens GN=GAS2L3 PE=1 SV=1	1	1	2	1.185
	SP://P27635	RL10_HUMAN 60S ribosomal protein L10 OS=Homo sapiens GN=RPL10 PE=1 SV=4	1	3	35	1.184
	SP://P78333	GPC5_HUMAN Glypican_5 OS=Homo sapiens GN=GPC5 PE=1 SV=1	1	1	3	1.182
	SP://P18206	VINC_HUMAN Vinculin OS=Homo sapiens GN=VCL PE=1 SV=4	1	1	2	1.182
	SP://P78332	RBM6_HUMAN RNA_binding protein 6 OS=Homo sapiens GN=RBM6 PE=1 SV=5	1	2	39	1.181
	SP://Q9H246	CA021_HUMAN Uncharacterized protein C1orf21 OS=Homo sapiens GN=C1orf21 PE=1 SV=1	1	3	13	1.181
	SP://P62805	H4_HUMAN Histone H4 OS=Homo sapiens GN=HIST1H4A PE=1 SV=2	1	1	10	1.181
	SP://P62491	RB11A_HUMAN Ras_related protein Rab_11A OS=Homo sapiens GN=RAB11A PE=1 SV=3	1	2	12	1.18
	SP://Q15907	RB11B_HUMAN Ras_related protein Rab_11B OS=Homo sapiens GN=RAB11B PE=1 SV=4	1	2	12	1.18
	SP://Q8N122	RPTOR_HUMAN Regulatory_associated protein of mTOR OS=Homo sapiens GN=RPTOR PE=1 SV=1	1	2	16	1.178
	SP://Q13469	NFAC2_HUMAN Nuclear factor of activated T_cells_ cytoplasmic 2 OS=Homo sapiens GN=NFATC2 PE=1 SV=2	1	1	27	1.177
	SP://P78508	IRK10_HUMAN ATP_sensitive inward rectifier potassium channel 10 OS=Homo sapiens GN=KCNJ10 PE=1 SV=1	1	1	6	1.177
	SP://P07992	ERCC1_HUMAN DNA excision repair protein ERCC_1 OS=Homo sapiens GN=ERCC1 PE=1 SV=1	1	1	2	1.177
	SP://Q15742	NAB2_HUMAN NGFI_A_binding protein 2 OS=Homo sapiens GN=NAB2 PE=1 SV=1	1	1	2	1.176
	SP://P0DJD4	RBY1C_HUMAN RNA_binding motif protein_ Y chromosome_ family 1 member C OS=Homo sapiens GN=RBMY1C PE=1 SV=1	1	1	31	1.175
	SP://O60504	VINEX_HUMAN Vinexin OS=Homo sapiens GN=SORBS3 PE=1 SV=2	1	2	18	1.175
	SP://P63279	UBC9_HUMAN SUMO_conjugating enzyme UBC9 OS=Homo sapiens GN=UBE2I PE=1 SV=1	1	1	10	1.175
	SP://Q9Y4L1	HYOU1_HUMAN Hypoxia up_regulated protein 1 OS=Homo sapiens GN=HYOU1 PE=1 SV=1	1	1	5	1.175
	SP://Q5THK1	PR14L_HUMAN Protein PRR14L OS=Homo sapiens GN=PRR14L PE=1 SV=1	1	2	5	1.172
	SP://Q9Y2L1	RRP44_HUMAN Exosome complex exonuclease RRP44 OS=Homo sapiens GN=DIS3 PE=1 SV=2	1	1	5	1.168
	SP://O75140	DEPD5_HUMAN DEP domain_containing protein 5 OS=Homo sapiens GN=DEPDC5 PE=2 SV=1	1	1	3	1.165
	SP://Q9NS62	THSD1_HUMAN Thrombospondin type_1 domain_containing protein 1 OS=Homo sapiens GN=THSD1 PE=1 SV=1	1	1	2	1.165
	SP://P62316	SMD2_HUMAN Small nuclear ribonucleoprotein Sm D2 OS=Homo sapiens GN=SNRPD2 PE=1 SV=1	1	2	12	1.164
	SP://P31947	1433S_HUMAN 14_3_3 protein sigma OS=Homo sapiens GN=SFN PE=1 SV=1	1	1	13	1.161
	SP://Q8N7M2	ZN283_HUMAN Zinc finger protein 283 OS=Homo sapiens GN=ZNF283 PE=2 SV=4	1	2	8	1.161
	SP://Q14155	ARHG7_HUMAN Rho guanine nucleotide exchange factor 7 OS=Homo sapiens GN=ARHGEF7 PE=1 SV=2	1	1	4	1.159
	SP://Q9H1P3	OSBL2_HUMAN Oxysterol_binding protein_related protein 2 OS=Homo sapiens GN=OSBPL2 PE=1 SV=1	1	1	2	1.154
	SP://Q9UG22	GIMA2_HUMAN GTPase IMAP family member 2 OS=Homo sapiens GN=GIMAP2 PE=1 SV=2	1	1	2	1.152
	SP://P32969	RL9_HUMAN 60S ribosomal protein L9 OS=Homo sapiens GN=RPL9 PE=1 SV=1	1	1	16	1.151
	SP://P08651	NFIC_HUMAN Nuclear factor 1 C_type OS=Homo sapiens GN=NFIC PE=1 SV=2	1	1	4	1.15
	SP://Q13443	ADAM9_HUMAN Disintegrin and metalloproteinase domain_containing protein 9 OS=Homo sapiens GN=ADAM9 PE=1 SV=1	1	1	3	1.15
	SP://Q7Z4L5	TT21B_HUMAN Tetratricopeptide repeat protein 21B OS=Homo sapiens GN=TTC21B PE=1 SV=2	1	1	2	1.15
	SP://P33993	MCM7_HUMAN DNA replication licensing factor MCM7 OS=Homo sapiens GN=MCM7 PE=1 SV=4	1	1	12	1.149
	SP://Q04637	IF4G1_HUMAN Eukaryotic translation initiation factor 4 gamma 1 OS=Homo sapiens GN=EIF4G1 PE=1 SV=4	1	1	11	1.148
	SP://Q9BYN7	ZN341_HUMAN Zinc finger protein 341 OS=Homo sapiens GN=ZNF341 PE=2 SV=2	1	1	6	1.148
	SP://O00534	VMA5A_HUMAN von Willebrand factor A domain_containing protein 5A OS=Homo sapiens GN=VWA5A PE=2 SV=2	1	1	2	1.148
	SP://Q5QJ74	TBCEL_HUMAN Tubulin_specific chaperone cofactor E_like protein OS=Homo sapiens GN=TBCEL PE=2 SV=2	1	1	2	1.148
	SP://Q9H2B2	SYT4_HUMAN Synaptotagmin_4 OS=Homo sapiens GN=SYT4 PE=1 SV=1	1	1	2	1.148
	SP://Q13394	MB211_HUMAN Protein mab_21_like 1 OS=Homo sapiens GN=MAB21L1 PE=2 SV=1	1	3	25	1.147
	SP://Q9Y586	MB212_HUMAN Protein mab_21_like 2 OS=Homo sapiens GN=MAB21L2 PE=2 SV=1	1	3	25	1.147
	SP://Q9NSB8	HOME2_HUMAN Homer protein homolog 2 OS=Homo sapiens GN=HOMER2 PE=1 SV=1	1	2	26	1.145
	SP://Q86V81	THOC4_HUMAN THO complex subunit 4 OS=Homo sapiens GN=ALYREF PE=1 SV=3	1	2	25	1.144
	SP://Q9H7R0	ZN442_HUMAN Zinc finger protein 442 OS=Homo sapiens GN=ZNF442 PE=2 SV=1	1	1	8	1.142
	SP://Q9P2D0	IBTK_HUMAN Inhibitor of Bruton tyrosine kinase OS=Homo sapiens GN=IBTK PE=1 SV=3	1	1	8	1.141
	SP://Q9C0F0	ASXL3_HUMAN Putative Polycomb group protein ASXL3 OS=Homo sapiens GN=ASXL3 PE=2 SV=3	1	1	3	1.141
	SP://P35498	SCN1A_HUMAN Sodium channel protein type 1 subunit alpha OS=Homo sapiens GN=SCN1A PE=1 SV=2	1	1	9	1.14
	SP://Q86SM8	MRGRE_HUMAN Mas_related G_protein coupled receptor member E OS=Homo sapiens GN=MRGPRE PE=2 SV=2	1	1	2	1.14
	SP://Q9GZS1	RPA49_HUMAN DNA_directed RNA polymerase I subunit RPA49 OS=Homo sapiens GN=POLR1E PE=1 SV=2	1	1	2	1.14
	SP://A7MD48	SRRM4_HUMAN Serine/arginine repetitive matrix protein 4 OS=Homo sapiens GN=SRRM4 PE=1 SV=2	1	1	2	1.139
	SP://Q9NZW5	MPP6_HUMAN MAGUK p55 subfamily member 6 OS=Homo sapiens GN=MPP6 PE=1 SV=2	1	1	4	1.138
	SP://A6XGL0	YJEN3_HUMAN YjeF N_terminal domain_containing protein 3 OS=Homo sapiens GN=YJEFN3 PE=1 SV=1	1	1	2	1.138
	SP://Q8TD22	SFXN5_HUMAN Sideroflexin_5 OS=Homo sapiens GN=SFXN5 PE=2 SV=1	1	1	2	1.137
	SP://P49590	SYHM_HUMAN Probable histidine__tRNA ligase_ mitochondrial OS=Homo sapiens GN=HARS2 PE=1 SV=1	1	1	7	1.136
	SP://Q02410	APBA1_HUMAN Amyloid beta A4 precursor protein_binding family A member 1 OS=Homo sapiens GN=APBA1 PE=1 SV=3	1	2	2	1.134
	SP://Q14123	PDE1C_HUMAN Calcium/calmodulin_dependent 3__5__cyclic nucleotide phosphodiesterase 1C OS=Homo sapiens GN=PDE1C PE=1 SV=1	1	1	3	1.133
	SP://P10243	MYBA_HUMAN Myb_related protein A OS=Homo sapiens GN=MYBL1 PE=1 SV=2	1	1	3	1.133
	SP://P61077	UB2D3_HUMAN Ubiquitin_conjugating enzyme E2 D3 OS=Homo sapiens GN=UBE2D3 PE=1 SV=1	1	1	3	1.133
	SP://P62837	UB2D2_HUMAN Ubiquitin_conjugating enzyme E2 D2 OS=Homo sapiens GN=UBE2D2 PE=1 SV=1	1	1	3	1.133
	SP://Q13489	BIRC3_HUMAN Baculoviral IAP repeat_containing protein 3 OS=Homo sapiens GN=BIRC3 PE=1 SV=2	1	1	2	1.133
	SP://Q13490	BIRC2_HUMAN Baculoviral IAP repeat_containing protein 2 OS=Homo sapiens GN=BIRC2 PE=1 SV=2	1	1	2	1.133
	SP://Q9BQG0	MBB1A_HUMAN Myb_binding protein 1A OS=Homo sapiens GN=MYBBP1A PE=1 SV=2	1	1	2	1.133
	SP://O94911	ABCA8_HUMAN ATP_binding cassette sub_family A member 8 OS=Homo sapiens GN=ABCA8 PE=1 SV=3	1	1	7	1.131
	SP://O15355	PPM1G_HUMAN Protein phosphatase 1G OS=Homo sapiens GN=PPM1G PE=1 SV=1	1	1	24	1.126
	SP://Q5BKZ1	ZN326_HUMAN DBIRD complex subunit ZNF326 OS=Homo sapiens GN=ZNF326 PE=1 SV=2	1	1	6	1.126
	SP://P57059	SIK1_HUMAN Serine/threonine_protein kinase SIK1 OS=Homo sapiens GN=SIK1 PE=1 SV=2	1	1	3	1.126
	SP://P43362	MAGA9_HUMAN Melanoma_associated antigen 9 OS=Homo sapiens GN=MAGEA9 PE=2 SV=1	1	2	30	1.125
	SP://Q9UPP1	PHF8_HUMAN Histone lysine demethylase PHF8 OS=Homo sapiens GN=PHF8 PE=1 SV=3	1	2	5	1.124
	SP://P38606	VATA_HUMAN V_type proton ATPase catalytic subunit A OS=Homo sapiens GN=ATP6V1A PE=1 SV=2	1	1	2	1.124
	SP://Q9UQ05	KCNH4_HUMAN Potassium voltage_gated channel subfamily H member 4 OS=Homo sapiens GN=KCNH4 PE=2 SV=1	1	3	19	1.118
	SP://Q92556	ELMO1_HUMAN Engulfment and cell motility protein 1 OS=Homo sapiens GN=ELMO1 PE=1 SV=2	1	1	8	1.118
	SP://Q13561	DCTN2_HUMAN Dynactin subunit 2 OS=Homo sapiens GN=DCTN2 PE=1 SV=4	1	1	4	1.118
	SP://P23588	IF4B_HUMAN Eukaryotic translation initiation factor 4B OS=Homo sapiens GN=EIF4B PE=1 SV=2	1	1	5	1.114
	SP://Q9UHJ3	SMBT1_HUMAN Scm_like with four MBT domains protein 1 OS=Homo sapiens GN=SFMBT1 PE=1 SV=2	1	1	10	1.113
	SP://Q15843	NEDD8_HUMAN NEDD8 OS=Homo sapiens GN=NEDD8 PE=1 SV=1	1	1	11	1.111
	SP://P55854	SUMO3_HUMAN Small ubiquitin_related modifier 3 OS=Homo sapiens GN=SUMO3 PE=1 SV=2	1	1	35	1.11
	SP://P61956	SUMO2_HUMAN Small ubiquitin_related modifier 2 OS=Homo sapiens GN=SUMO2 PE=1 SV=3	1	1	35	1.11
	SP://P62333	PRS10_HUMAN 26S protease regulatory subunit 10B OS=Homo sapiens GN=PSMC6 PE=1 SV=1	1	1	9	1.11
	SP://O60231	DHX16_HUMAN Putative pre_mRNA_splicing factor ATP_dependent RNA helicase DHX16 OS=Homo sapiens GN=DHX16 PE=1 SV=2	1	1	3	1.11
	SP://Q9UL59	ZN214_HUMAN Zinc finger protein 214 OS=Homo sapiens GN=ZNF214 PE=2 SV=2	1	1	2	1.11
	SP://Q4KWH8	PLCH1_HUMAN 1_phosphatidylinositol 4_5_bisphosphate phosphodiesterase eta_1 OS=Homo sapiens GN=PLCH1 PE=1 SV=1	1	1	2	1.11
	SP://Q96RU2	UBP28_HUMAN Ubiquitin carboxyl_terminal hydrolase 28 OS=Homo sapiens GN=USP28 PE=1 SV=1	1	1	2	1.11
	SP://Q9BXU7	UBP26_HUMAN Ubiquitin carboxyl_terminal hydrolase 26 OS=Homo sapiens GN=USP26 PE=1 SV=1	1	1	2	1.11
	SP://Q8NA03	FSIP1_HUMAN Fibrous sheath_interacting protein 1 OS=Homo sapiens GN=FSIP1 PE=2 SV=1	1	1	2	1.109
	SP://P00492	HPRT_HUMAN Hypoxanthine_guanine phosphoribosyltransferase OS=Homo sapiens GN=HPRT1 PE=1 SV=2	1	1	2	1.108
	SP://Q9BXI3	5NT1A_HUMAN Cytosolic 5__nucleotidase 1A OS=Homo sapiens GN=NT5C1A PE=2 SV=1	1	1	8	1.107
	SP://A8MZA4	GG6L6_HUMAN Putative golgin subfamily A member 6_like protein 6 OS=Homo sapiens GN=GOLGA6L6 PE=5 SV=3	1	1	3	1.107
	SP://Q8N7Z2	GG6L1_HUMAN Golgin subfamily A member 6_like protein 1 OS=Homo sapiens GN=GOLGA6L1 PE=2 SV=2	1	1	3	1.107
	SP://Q8N6K4	YP021_HUMAN Putative uncharacterized protein MGC34800 OS=Homo sapiens PE=2 SV=1	1	1	3	1.107
	SP://O15131	IMA5_HUMAN Importin subunit alpha_6 OS=Homo sapiens GN=KPNA5 PE=1 SV=2	1	1	4	1.106
	SP://P09234	RU1C_HUMAN U1 small nuclear ribonucleoprotein C OS=Homo sapiens GN=SNRPC PE=1 SV=1	1	1	17	1.105
	SP://Q8TAQ2	SMRC2_HUMAN SWI/SNF complex subunit SMARCC2 OS=Homo sapiens GN=SMARCC2 PE=1 SV=1	1	2	10	1.104
	SP://Q6IMN6	CAPR2_HUMAN Caprin_2 OS=Homo sapiens GN=CAPRIN2 PE=1 SV=1	1	2	10	1.104
	SP://Q93045	STMN2_HUMAN Stathmin_2 OS=Homo sapiens GN=STMN2 PE=1 SV=3	1	1	7	1.104
	SP://Q3SXZ3	ZN718_HUMAN Zinc finger protein 718 OS=Homo sapiens GN=ZNF718 PE=2 SV=1	1	2	2	1.104
	SP://Q5T1R4	ZEP3_HUMAN Transcription factor HIVEP3 OS=Homo sapiens GN=HIVEP3 PE=1 SV=1	1	1	3	1.103
	SP://Q9NQT8	KI13B_HUMAN Kinesin_like protein KIF13B OS=Homo sapiens GN=KIF13B PE=1 SV=1	1	1	3	1.103
	SP://Q92973	TNPO1_HUMAN Transportin_1 OS=Homo sapiens GN=TNPO1 PE=1 SV=2	1	1	10	1.102
	SP://Q9UPQ7	PZRN3_HUMAN E3 ubiquitin_protein ligase PDZRN3 OS=Homo sapiens GN=PDZRN3 PE=1 SV=2	1	1	3	1.102
	SP://Q9NP79	VTA1_HUMAN Vacuolar protein sorting_associated protein VTA1 homolog OS=Homo sapiens GN=VTA1 PE=1 SV=1	1	1	3	1.101
	SP://Q9NP73	ALG13_HUMAN UDP_N_acetylglucosamine transferase subunit ALG13 homolog OS=Homo sapiens GN=ALG13 PE=1 SV=2	1	1	7	1.099
	SP://Q9Y6G9	DC1L1_HUMAN Cytoplasmic dynein 1 light intermediate chain 1 OS=Homo sapiens GN=DYNC1LI1 PE=1 SV=3	1	1	10	1.097
	SP://Q9UMX0	UBQL1_HUMAN Ubiquilin_1 OS=Homo sapiens GN=UBQLN1 PE=1 SV=2	1	1	3	1.095
	SP://O60437	PEPL_HUMAN Periplakin OS=Homo sapiens GN=PPL PE=1 SV=4	1	1	8	1.094
	SP://O76003	GLRX3_HUMAN Glutaredoxin_3 OS=Homo sapiens GN=GLRX3 PE=1 SV=2	1	1	11	1.093
	SP://Q15056	IF4H_HUMAN Eukaryotic translation initiation factor 4H OS=Homo sapiens GN=EIF4H PE=1 SV=5	1	1	2	1.093
	SP://Q00526	CDK3_HUMAN Cyclin_dependent kinase 3 OS=Homo sapiens GN=CDK3 PE=1 SV=1	1	1	11	1.09
	SP://B1AL88	F155A_HUMAN Transmembrane protein FAM155A OS=Homo sapiens GN=FAM155A PE=2 SV=1	1	1	5	1.09
	SP://Q9P241	AT10D_HUMAN Probable phospholipid_transporting ATPase VD OS=Homo sapiens GN=ATP10D PE=2 SV=3	1	1	3	1.09
	SP://Q9NYF0	DACT1_HUMAN Dapper homolog 1 OS=Homo sapiens GN=DACT1 PE=2 SV=2	1	1	2	1.09
	SP://Q3SXY8	AR13B_HUMAN ADP_ribosylation factor_like protein 13B OS=Homo sapiens GN=ARL13B PE=1 SV=1	1	1	16	1.089
	SP://Q8WUG5	S22AH_HUMAN Solute carrier family 22 member 17 OS=Homo sapiens GN=SLC22A17 PE=2 SV=1	1	2	12	1.089
	SP://Q96P44	COLA1_HUMAN Collagen alpha_1(XXI) chain OS=Homo sapiens GN=COL21A1 PE=2 SV=1	1	1	9	1.089
	SP://Q9NP80	PLPL8_HUMAN Calcium_independent phospholipase A2_gamma OS=Homo sapiens GN=PNPLA8 PE=1 SV=1	1	1	6	1.089
	SP://O75923	DYSF_HUMAN Dysferlin OS=Homo sapiens GN=DYSF PE=1 SV=1	1	1	5	1.089
	SP://P20248	CCNA2_HUMAN Cyclin_A2 OS=Homo sapiens GN=CCNA2 PE=1 SV=2	1	1	2	1.089
	SP://Q6ZQV5	ZN788_HUMAN Zinc finger protein 788 OS=Homo sapiens GN=ZNF788 PE=2 SV=2	1	1	2	1.089
	SP://Q9H1Y3	OPN3_HUMAN Opsin_3 OS=Homo sapiens GN=OPN3 PE=1 SV=1	1	1	2	1.089
	SP://P40926	MDHM_HUMAN Malate dehydrogenase_ mitochondrial OS=Homo sapiens GN=MDH2 PE=1 SV=3	1	1	12	1.088
	SP://Q9P2R6	RERE_HUMAN Arginine_glutamic acid dipeptide repeats protein OS=Homo sapiens GN=RERE PE=1 SV=2	1	2	11	1.088
	SP://Q8N907	DAND5_HUMAN DAN domain family member 5 OS=Homo sapiens GN=DAND5 PE=2 SV=1	1	2	8	1.088
	SP://O43776	SYNC_HUMAN Asparagine__tRNA ligase_ cytoplasmic OS=Homo sapiens GN=NARS PE=1 SV=1	1	1	3	1.085
	SP://P24666	PPAC_HUMAN Low molecular weight phosphotyrosine protein phosphatase OS=Homo sapiens GN=ACP1 PE=1 SV=3	1	1	2	1.085
	SP://Q9UL25	RAB21_HUMAN Ras_related protein Rab_21 OS=Homo sapiens GN=RAB21 PE=1 SV=3	1	1	2	1.082
	SP://Q8N142	PURA1_HUMAN Adenylosuccinate synthetase isozyme 1 OS=Homo sapiens GN=ADSSL1 PE=1 SV=1	1	1	5	1.081
	SP://Q8NER1	TRPV1_HUMAN Transient receptor potential cation channel subfamily V member 1 OS=Homo sapiens GN=TRPV1 PE=1 SV=2	1	1	2	1.081
	SP://P09496	CLCA_HUMAN Clathrin light chain A OS=Homo sapiens GN=CLTA PE=1 SV=1	1	1	5	1.08
	SP://Q2KJ03	ZRAS1_HUMAN Putative uncharacterized protein ZNRD1_AS1 OS=Homo sapiens GN=ZNRD1_AS1 PE=5 SV=1	1	1	7	1.079
	SP://Q9BZW7	TSG10_HUMAN Testis_specific gene 10 protein OS=Homo sapiens GN=TSGA10 PE=1 SV=1	1	1	2	1.078
	SP://Q9Y281	COF2_HUMAN Cofilin_2 OS=Homo sapiens GN=CFL2 PE=1 SV=1	1	2	9	1.077
	SP://Q5VSP4	LC1L1_HUMAN Putative lipocalin 1_like protein 1 OS=Homo sapiens GN=LCN1P1 PE=5 SV=1	1	1	2	1.077
	SP://Q8NE71	ABCF1_HUMAN ATP_binding cassette sub_family F member 1 OS=Homo sapiens GN=ABCF1 PE=1 SV=2	1	1	5	1.075
	SP://Q9NTJ4	MA2C1_HUMAN Alpha_mannosidase 2C1 OS=Homo sapiens GN=MAN2C1 PE=1 SV=1	1	1	4	1.075
	SP://P16401	H15_HUMAN Histone H1.5 OS=Homo sapiens GN=HIST1H1B PE=1 SV=3	1	1	11	1.073
	SP://P61204	ARF3_HUMAN ADP_ribosylation factor 3 OS=Homo sapiens GN=ARF3 PE=1 SV=2	1	3	24	1.072
	SP://P84077	ARF1_HUMAN ADP_ribosylation factor 1 OS=Homo sapiens GN=ARF1 PE=1 SV=2	1	3	24	1.072
	SP://P49454	CENPF_HUMAN Centromere protein F OS=Homo sapiens GN=CENPF PE=1 SV=2	1	1	2	1.072
	SP://Q9UJV9	DDX41_HUMAN Probable ATP_dependent RNA helicase DDX41 OS=Homo sapiens GN=DDX41 PE=1 SV=2	1	1	15	1.064
	SP://Q8NG66	NEK11_HUMAN Serine/threonine_protein kinase Nek11 OS=Homo sapiens GN=NEK11 PE=1 SV=2	1	2	9	1.064
	SP://Q14722	KCAB1_HUMAN Voltage_gated potassium channel subunit beta_1 OS=Homo sapiens GN=KCNAB1 PE=2 SV=1	1	2	4	1.064
	SP://Q96M63	CC114_HUMAN Coiled_coil domain_containing protein 114 OS=Homo sapiens GN=CCDC114 PE=2 SV=3	1	1	2	1.062
	SP://Q8N0X4	CLYBL_HUMAN Citrate lyase subunit beta_like protein_ mitochondrial OS=Homo sapiens GN=CLYBL PE=2 SV=2	1	2	11	1.061
	SP://Q8N1I0	DOCK4_HUMAN Dedicator of cytokinesis protein 4 OS=Homo sapiens GN=DOCK4 PE=1 SV=3	1	1	4	1.061
	SP://P06737	PYGL_HUMAN Glycogen phosphorylase_ liver form OS=Homo sapiens GN=PYGL PE=1 SV=4	1	1	4	1.061
	SP://Q6V0I7	FAT4_HUMAN Protocadherin Fat 4 OS=Homo sapiens GN=FAT4 PE=1 SV=2	1	1	3	1.061
	SP://Q68DQ2	CRBG3_HUMAN Beta/gamma crystallin domain_containing protein 3 OS=Homo sapiens GN=CRYBG3 PE=2 SV=2	1	2	9	1.06
	SP://Q9H9G7	AGO3_HUMAN Protein argonaute_3 OS=Homo sapiens GN=EIF2C3 PE=1 SV=2	1	1	2	1.06
	SP://Q9HCK5	AGO4_HUMAN Protein argonaute_4 OS=Homo sapiens GN=EIF2C4 PE=1 SV=2	1	1	2	1.06
	SP://Q9UL18	AGO1_HUMAN Protein argonaute_1 OS=Homo sapiens GN=EIF2C1 PE=1 SV=3	1	1	2	1.06
	SP://O43423	AN32C_HUMAN Acidic leucine_rich nuclear phosphoprotein 32 family member C OS=Homo sapiens GN=ANP32C PE=2 SV=1	1	1	23	1.059
	SP://P13674	P4HA1_HUMAN Prolyl 4_hydroxylase subunit alpha_1 OS=Homo sapiens GN=P4HA1 PE=1 SV=2	1	1	2	1.059
	SP://Q96EZ4	MYEOV_HUMAN Myeloma_overexpressed gene protein OS=Homo sapiens GN=MYEOV PE=2 SV=2	1	1	3	1.058
	SP://Q14498	RBM39_HUMAN RNA_binding protein 39 OS=Homo sapiens GN=RBM39 PE=1 SV=2	1	1	17	1.057
	SP://P56470	LEG4_HUMAN Galectin_4 OS=Homo sapiens GN=LGALS4 PE=1 SV=1	1	1	14	1.057
	SP://Q9BY15	EMR3_HUMAN EGF_like module_containing mucin_like hormone receptor_like 3 OS=Homo sapiens GN=EMR3 PE=1 SV=2	1	1	10	1.057
	SP://Q9H582	ZN644_HUMAN Zinc finger protein 644 OS=Homo sapiens GN=ZNF644 PE=1 SV=2	1	1	7	1.057
	SP://Q7Z3D4	LYSM3_HUMAN LysM and putative peptidoglycan_binding domain_containing protein 3 OS=Homo sapiens GN=LYSMD3 PE=2 SV=2	1	1	5	1.057
	SP://Q9C0B2	K1751_HUMAN Uncharacterized protein KIAA1751 OS=Homo sapiens GN=KIAA1751 PE=2 SV=2	1	1	5	1.057
	SP://Q9BRP4	PAAF1_HUMAN Proteasomal ATPase_associated factor 1 OS=Homo sapiens GN=PAAF1 PE=1 SV=2	1	1	4	1.057
	SP://Q9Y4X0	AMMR1_HUMAN AMME syndrome candidate gene 1 protein OS=Homo sapiens GN=AMMECR1 PE=2 SV=1	1	1	3	1.057
	SP://P49643	PRI2_HUMAN DNA primase large subunit OS=Homo sapiens GN=PRIM2 PE=1 SV=2	1	1	2	1.057
	SP://Q9BQI6	ANR32_HUMAN Ankyrin repeat domain_containing protein 32 OS=Homo sapiens GN=ANKRD32 PE=1 SV=2	1	1	2	1.057
	SP://P62847	RS24_HUMAN 40S ribosomal protein S24 OS=Homo sapiens GN=RPS24 PE=1 SV=1	1	2	36	1.055
	SP://O60256	KPRB_HUMAN Phosphoribosyl pyrophosphate synthase_associated protein 2 OS=Homo sapiens GN=PRPSAP2 PE=1 SV=1	1	1	10	1.055
	SP://Q14558	KPRA_HUMAN Phosphoribosyl pyrophosphate synthase_associated protein 1 OS=Homo sapiens GN=PRPSAP1 PE=1 SV=2	1	1	10	1.055
	SP://Q86VI3	IQGA3_HUMAN Ras GTPase_activating_like protein IQGAP3 OS=Homo sapiens GN=IQGAP3 PE=1 SV=2	1	1	6	1.055
	SP://P48595	SPB10_HUMAN Serpin B10 OS=Homo sapiens GN=SERPINB10 PE=1 SV=1	1	1	3	1.055
	SP://P47211	GALR1_HUMAN Galanin receptor type 1 OS=Homo sapiens GN=GALR1 PE=2 SV=3	1	2	3	1.055
	SP://Q99615	DNJC7_HUMAN DnaJ homolog subfamily C member 7 OS=Homo sapiens GN=DNAJC7 PE=1 SV=2	1	1	3	1.055
	SP://Q9H0B6	KLC2_HUMAN Kinesin light chain 2 OS=Homo sapiens GN=KLC2 PE=1 SV=1	1	2	2	1.052
	SP://P07197	NFM_HUMAN Neurofilament medium polypeptide OS=Homo sapiens GN=NEFM PE=1 SV=3	1	2	45	1.051
	SP://Q16352	AINX_HUMAN Alpha_internexin OS=Homo sapiens GN=INA PE=1 SV=2	1	2	45	1.051
	SP://Q8IX95	CTGE3_HUMAN Putative cutaneous T_cell lymphoma_associated antigen 3 OS=Homo sapiens GN=CTAGE3P PE=5 SV=1	1	1	6	1.051
	SP://O15033	K0317_HUMAN Protein KIAA0317 OS=Homo sapiens GN=KIAA0317 PE=2 SV=3	1	1	3	1.05
	SP://Q9GZV8	PRD14_HUMAN PR domain zinc finger protein 14 OS=Homo sapiens GN=PRDM14 PE=1 SV=1	1	1	2	1.049
	SP://Q00534	CDK6_HUMAN Cyclin_dependent kinase 6 OS=Homo sapiens GN=CDK6 PE=1 SV=1	1	1	8	1.047
	SP://Q9P2E3	ZNFX1_HUMAN NFX1_type zinc finger_containing protein 1 OS=Homo sapiens GN=ZNFX1 PE=1 SV=2	1	1	3	1.046
	SP://Q6UB35	C1TM_HUMAN Monofunctional C1_tetrahydrofolate synthase_ mitochondrial OS=Homo sapiens GN=MTHFD1L PE=1 SV=1	1	1	2	1.046
	SP://Q9Y4F5	K0284_HUMAN Protein KIAA0284 OS=Homo sapiens GN=KIAA0284 PE=1 SV=4	1	2	13	1.045
	SP://P35240	MERL_HUMAN Merlin OS=Homo sapiens GN=NF2 PE=1 SV=1	1	1	8	1.044
	SP://Q8IWA6	CCD60_HUMAN Coiled_coil domain_containing protein 60 OS=Homo sapiens GN=CCDC60 PE=2 SV=2	1	1	4	1.044
	SP://O15047	SET1A_HUMAN Histone_lysine N_methyltransferase SETD1A OS=Homo sapiens GN=SETD1A PE=1 SV=3	1	2	6	1.043
	SP://Q8N1F7	NUP93_HUMAN Nuclear pore complex protein Nup93 OS=Homo sapiens GN=NUP93 PE=1 SV=2	1	2	4	1.043
	SP://P01266	THYG_HUMAN Thyroglobulin OS=Homo sapiens GN=TG PE=1 SV=5	1	2	11	1.041
	SP://O94941	RNF37_HUMAN RING finger protein 37 OS=Homo sapiens GN=UBOX5 PE=2 SV=1	1	1	4	1.041
	SP://Q13796	SHRM2_HUMAN Protein Shroom2 OS=Homo sapiens GN=SHROOM2 PE=1 SV=1	1	2	2	1.041
	SP://P04275	VWF_HUMAN von Willebrand factor OS=Homo sapiens GN=VWF PE=1 SV=4	1	1	2	1.04
	SP://P57721	PCBP3_HUMAN Poly(rC)_binding protein 3 OS=Homo sapiens GN=PCBP3 PE=1 SV=2	1	1	31	1.039
	SP://Q9H777	RNZ1_HUMAN Zinc phosphodiesterase ELAC protein 1 OS=Homo sapiens GN=ELAC1 PE=1 SV=2	1	1	2	1.038
	SP://Q6ZW05	PTHD4_HUMAN Patched domain_containing protein 4 OS=Homo sapiens GN=PTCHD4 PE=2 SV=3	1	2	2	1.036
	SP://Q9BWJ5	SF3B5_HUMAN Splicing factor 3B subunit 5 OS=Homo sapiens GN=SF3B5 PE=1 SV=1	1	2	14	1.035
	SP://O00533	CHL1_HUMAN Neural cell adhesion molecule L1_like protein OS=Homo sapiens GN=CHL1 PE=1 SV=4	1	1	2	1.035
	SP://O95817	BAG3_HUMAN BAG family molecular chaperone regulator 3 OS=Homo sapiens GN=BAG3 PE=1 SV=3	1	1	13	1.033
	SP://Q13268	DHRS2_HUMAN Dehydrogenase/reductase SDR family member 2 OS=Homo sapiens GN=DHRS2 PE=1 SV=3	1	1	6	1.032
	SP://P26358	DNMT1_HUMAN DNA (cytosine_5)_methyltransferase 1 OS=Homo sapiens GN=DNMT1 PE=1 SV=2	1	1	5	1.031
	SP://Q7L2H7	EIF3M_HUMAN Eukaryotic translation initiation factor 3 subunit M OS=Homo sapiens GN=EIF3M PE=1 SV=1	1	2	16	1.029
	SP://O95199	RCBT2_HUMAN RCC1 and BTB domain_containing protein 2 OS=Homo sapiens GN=RCBTB2 PE=2 SV=1	1	2	4	1.029
	SP://P14314	GLU2B_HUMAN Glucosidase 2 subunit beta OS=Homo sapiens GN=PRKCSH PE=1 SV=2	1	1	18	1.027
	SP://Q685J3	MUC17_HUMAN Mucin_17 OS=Homo sapiens GN=MUC17 PE=1 SV=2	1	1	6	1.026
	SP://Q4VCS5	AMOT_HUMAN Angiomotin OS=Homo sapiens GN=AMOT PE=1 SV=1	1	1	2	1.026
	SP://P01595	KV103_HUMAN Ig kappa chain V_I region Bi OS=Homo sapiens PE=1 SV=1	1	1	2	1.025
	SP://O14782	KIF3C_HUMAN Kinesin_like protein KIF3C OS=Homo sapiens GN=KIF3C PE=1 SV=3	1	1	10	1.024
	SP://O14556	G3PT_HUMAN Glyceraldehyde_3_phosphate dehydrogenase_ testis_specific OS=Homo sapiens GN=GAPDHS PE=1 SV=2	1	1	7	1.023
	SP://Q9HB07	MYG1_HUMAN UPF0160 protein MYG1_ mitochondrial OS=Homo sapiens GN=C12orf10 PE=1 SV=2	1	1	4	1.023
	SP://Q2M218	ZN630_HUMAN Zinc finger protein 630 OS=Homo sapiens GN=ZNF630 PE=2 SV=1	1	1	2	1.023
	SP://Q92526	TCPW_HUMAN T_complex protein 1 subunit zeta_2 OS=Homo sapiens GN=CCT6B PE=1 SV=5	1	2	34	1.022
	SP://P11586	C1TC_HUMAN C_1_tetrahydrofolate synthase_ cytoplasmic OS=Homo sapiens GN=MTHFD1 PE=1 SV=3	1	1	9	1.022
	SP://Q8N883	ZN614_HUMAN Zinc finger protein 614 OS=Homo sapiens GN=ZNF614 PE=2 SV=2	1	1	4	1.022
	SP://Q9UKW4	VAV3_HUMAN Guanine nucleotide exchange factor VAV3 OS=Homo sapiens GN=VAV3 PE=1 SV=1	1	2	2	1.02
	SP://Q9H223	EHD4_HUMAN EH domain_containing protein 4 OS=Homo sapiens GN=EHD4 PE=1 SV=1	1	1	14	1.018
	SP://Q5U5X8	CL034_HUMAN Uncharacterized protein C12orf34 OS=Homo sapiens GN=C12orf34 PE=2 SV=1	1	1	7	1.018
	SP://O43861	ATP9B_HUMAN Probable phospholipid_transporting ATPase IIB OS=Homo sapiens GN=ATP9B PE=2 SV=4	1	1	3	1.018
	SP://Q9Y6D5	BIG2_HUMAN Brefeldin A_inhibited guanine nucleotide_exchange protein 2 OS=Homo sapiens GN=ARFGEF2 PE=1 SV=3	1	1	3	1.018
	SP://P40763	STAT3_HUMAN Signal transducer and activator of transcription 3 OS=Homo sapiens GN=STAT3 PE=1 SV=2	1	1	2	1.018
	SP://P49763	PLGF_HUMAN Placenta growth factor OS=Homo sapiens GN=PGF PE=1 SV=2	1	1	2	1.018
	SP://Q9BY43	CHM4A_HUMAN Charged multivesicular body protein 4a OS=Homo sapiens GN=CHMP4A PE=1 SV=3	1	1	2	1.018
	SP://P54727	RD23B_HUMAN UV excision repair protein RAD23 homolog B OS=Homo sapiens GN=RAD23B PE=1 SV=1	1	1	9	1.017
	SP://P00751	CFAB_HUMAN Complement factor B OS=Homo sapiens GN=CFB PE=1 SV=2	1	1	4	1.016
	SP://Q9Y223	GLCNE_HUMAN Bifunctional UDP_N_acetylglucosamine 2_epimerase/N_acetylmannosamine kinase OS=Homo sapiens GN=GNE PE=1 SV=1	1	1	8	1.015
	SP://O14746	TERT_HUMAN Telomerase reverse transcriptase OS=Homo sapiens GN=TERT PE=1 SV=1	1	1	5	1.015
	SP://O00194	RB27B_HUMAN Ras_related protein Rab_27B OS=Homo sapiens GN=RAB27B PE=1 SV=4	1	1	3	1.015
	SP://Q6ZRQ5	MMS22_HUMAN Protein MMS22_like OS=Homo sapiens GN=MMS22L PE=1 SV=3	1	1	2	1.014
	SP://Q8N3P4	VPS8_HUMAN Vacuolar protein sorting_associated protein 8 homolog OS=Homo sapiens GN=VPS8 PE=1 SV=3	1	1	2	1.014
	SP://Q9NRD8	DUOX2_HUMAN Dual oxidase 2 OS=Homo sapiens GN=DUOX2 PE=1 SV=2	1	1	2	1.014
	SP://Q9NRD9	DUOX1_HUMAN Dual oxidase 1 OS=Homo sapiens GN=DUOX1 PE=1 SV=1	1	1	2	1.014
	SP://Q9UMS5	PHTF1_HUMAN Putative homeodomain transcription factor 1 OS=Homo sapiens GN=PHTF1 PE=2 SV=2	1	1	2	1.014
	SP://Q9HB40	RISC_HUMAN Retinoid_inducible serine carboxypeptidase OS=Homo sapiens GN=SCPEP1 PE=1 SV=1	1	1	3	1.013
	SP://Q8ND61	CC020_HUMAN Uncharacterized protein C3orf20 OS=Homo sapiens GN=C3orf20 PE=1 SV=2	1	1	2	1.013
	SP://Q9NPD8	UBE2T_HUMAN Ubiquitin_conjugating enzyme E2 T OS=Homo sapiens GN=UBE2T PE=1 SV=1	1	1	11	1.012
	SP://P30740	ILEU_HUMAN Leukocyte elastase inhibitor OS=Homo sapiens GN=SERPINB1 PE=1 SV=1	1	1	2	1.012
	SP://Q7Z5L9	I2BP2_HUMAN Interferon regulatory factor 2_binding protein 2 OS=Homo sapiens GN=IRF2BP2 PE=1 SV=2	1	1	2	1.01
	SP://Q9H244	P2Y12_HUMAN P2Y purinoceptor 12 OS=Homo sapiens GN=P2RY12 PE=1 SV=1	1	1	4	1.008
	SP://Q86YQ8	CPNE8_HUMAN Copine_8 OS=Homo sapiens GN=CPNE8 PE=1 SV=2	1	2	16	1.007
	SP://Q6P996	PDXD1_HUMAN Pyridoxal_dependent decarboxylase domain_containing protein 1 OS=Homo sapiens GN=PDXDC1 PE=1 SV=2	1	1	8	1.005
	SP://Q8N4B1	SESQ1_HUMAN Sesquipedalian_1 OS=Homo sapiens GN=FAM109A PE=1 SV=1	1	1	2	1.005
	SP://P49662	CASP4_HUMAN Caspase_4 OS=Homo sapiens GN=CASP4 PE=1 SV=1	1	2	8	1.004
	SP://O95793	STAU1_HUMAN Double_stranded RNA_binding protein Staufen homolog 1 OS=Homo sapiens GN=STAU1 PE=1 SV=2	1	1	3	1.004
	SP://P20783	NTF3_HUMAN Neurotrophin_3 OS=Homo sapiens GN=NTF3 PE=1 SV=1	1	1	3	1.003
	SP://Q9BWD1	THIC_HUMAN Acetyl_CoA acetyltransferase_ cytosolic OS=Homo sapiens GN=ACAT2 PE=1 SV=2	1	1	2	1.003
	SP://P23528	COF1_HUMAN Cofilin_1 OS=Homo sapiens GN=CFL1 PE=1 SV=3	1	2	65	1.002
	SP://Q96JS3	PGBD1_HUMAN PiggyBac transposable element_derived protein 1 OS=Homo sapiens GN=PGBD1 PE=1 SV=1	1	2	15	1.002
	SP://P35609	ACTN2_HUMAN Alpha_actinin_2 OS=Homo sapiens GN=ACTN2 PE=1 SV=1	1	1	7	1.001
	SP://O75593	FOXH1_HUMAN Forkhead box protein H1 OS=Homo sapiens GN=FOXH1 PE=1 SV=1	1	1	3	1.001
	SP://Q9NQP4	PFD4_HUMAN Prefoldin subunit 4 OS=Homo sapiens GN=PFDN4 PE=1 SV=1	1	1	10	0.999
	SP://O43306	ADCY6_HUMAN Adenylate cyclase type 6 OS=Homo sapiens GN=ADCY6 PE=1 SV=2	1	1	4	0.996
	SP://Q99417	MYCBP_HUMAN C_Myc_binding protein OS=Homo sapiens GN=MYCBP PE=1 SV=3	1	1	9	0.994
	SP://P13611	CSPG2_HUMAN Versican core protein OS=Homo sapiens GN=VCAN PE=1 SV=3	1	1	2	0.994
	SP://Q9H910	HN1L_HUMAN Hematological and neurological expressed 1_like protein OS=Homo sapiens GN=HN1L PE=1 SV=1	1	1	18	0.993
	SP://Q06210	GFPT1_HUMAN Glucosamine__fructose_6_phosphate aminotransferase [isomerizing] 1 OS=Homo sapiens GN=GFPT1 PE=1 SV=3	1	1	4	0.993
	SP://O60739	EIF1B_HUMAN Eukaryotic translation initiation factor 1b OS=Homo sapiens GN=EIF1B PE=1 SV=2	1	1	2	0.991
	SP://Q8IVV2	LOXH1_HUMAN Lipoxygenase homology domain_containing protein 1 OS=Homo sapiens GN=LOXHD1 PE=2 SV=3	1	1	2	0.991
	SP://P49189	AL9A1_HUMAN 4_trimethylaminobutyraldehyde dehydrogenase OS=Homo sapiens GN=ALDH9A1 PE=1 SV=3	1	1	9	0.989
	SP://P15144	AMPN_HUMAN Aminopeptidase N OS=Homo sapiens GN=ANPEP PE=1 SV=4	1	1	5	0.989
	SP://Q86UE4	LYRIC_HUMAN Protein LYRIC OS=Homo sapiens GN=MTDH PE=1 SV=2	1	1	5	0.989
	SP://Q9UIF9	BAZ2A_HUMAN Bromodomain adjacent to zinc finger domain protein 2A OS=Homo sapiens GN=BAZ2A PE=1 SV=4	1	1	3	0.989
	SP://P17858	K6PL_HUMAN 6_phosphofructokinase_ liver type OS=Homo sapiens GN=PFKL PE=1 SV=6	1	2	27	0.985
	SP://Q8NC51	PAIRB_HUMAN Plasminogen activator inhibitor 1 RNA_binding protein OS=Homo sapiens GN=SERBP1 PE=1 SV=2	1	2	36	0.983
	SP://Q15370	ELOB_HUMAN Transcription elongation factor B polypeptide 2 OS=Homo sapiens GN=TCEB2 PE=1 SV=1	1	1	2	0.983
	SP://O43809	CPSF5_HUMAN Cleavage and polyadenylation specificity factor subunit 5 OS=Homo sapiens GN=NUDT21 PE=1 SV=1	1	2	11	0.982
	SP://P61201	CSN2_HUMAN COP9 signalosome complex subunit 2 OS=Homo sapiens GN=COPS2 PE=1 SV=1	1	1	10	0.982
	SP://P78396	CCNA1_HUMAN Cyclin_A1 OS=Homo sapiens GN=CCNA1 PE=1 SV=1	1	1	3	0.982
	SP://Q9Y5B9	SP16H_HUMAN FACT complex subunit SPT16 OS=Homo sapiens GN=SUPT16H PE=1 SV=1	1	1	3	0.98
	SP://Q59EK9	RUN3A_HUMAN RUN domain_containing protein 3A OS=Homo sapiens GN=RUNDC3A PE=2 SV=2	1	3	43	0.977
	SP://Q00722	PLCB2_HUMAN 1_phosphatidylinositol 4_5_bisphosphate phosphodiesterase beta_2 OS=Homo sapiens GN=PLCB2 PE=1 SV=2	1	2	3	0.975
	SP://Q9BRQ4	CK070_HUMAN Uncharacterized protein C11orf70 OS=Homo sapiens GN=C11orf70 PE=2 SV=3	1	1	2	0.974
	SP://P29692	EF1D_HUMAN Elongation factor 1_delta OS=Homo sapiens GN=EEF1D PE=1 SV=5	1	1	24	0.973
	SP://Q6ZRM9	YG024_HUMAN Putative uncharacterized protein FLJ46235 OS=Homo sapiens PE=1 SV=1	1	2	15	0.973
	SP://Q5CZ79	AN20B_HUMAN Ankyrin repeat domain_containing protein 20B OS=Homo sapiens GN=ANKRD20A8P PE=2 SV=2	1	1	2	0.973
	SP://Q5TAT6	CODA1_HUMAN Collagen alpha_1(XIII) chain OS=Homo sapiens GN=COL13A1 PE=1 SV=1	1	1	2	0.973
	SP://Q63HK5	TSH3_HUMAN Teashirt homolog 3 OS=Homo sapiens GN=TSHZ3 PE=1 SV=2	1	2	35	0.972
	SP://P08579	RU2B_HUMAN U2 small nuclear ribonucleoprotein B__ OS=Homo sapiens GN=SNRPB2 PE=1 SV=1	1	1	12	0.972
	SP://Q9Y697	NFS1_HUMAN Cysteine desulfurase_ mitochondrial OS=Homo sapiens GN=NFS1 PE=1 SV=3	1	1	6	0.972
	SP://Q9BZZ5	API5_HUMAN Apoptosis inhibitor 5 OS=Homo sapiens GN=API5 PE=1 SV=3	1	1	2	0.972
	SP://Q8N1G4	LRC47_HUMAN Leucine_rich repeat_containing protein 47 OS=Homo sapiens GN=LRRC47 PE=1 SV=1	1	1	12	0.97
	SP://Q7Z589	EMSY_HUMAN Protein EMSY OS=Homo sapiens GN=EMSY PE=1 SV=2	1	1	2	0.97
	SP://Q93100	KPBB_HUMAN Phosphorylase b kinase regulatory subunit beta OS=Homo sapiens GN=PHKB PE=1 SV=3	1	1	2	0.968
	SP://Q99708	COM1_HUMAN DNA endonuclease RBBP8 OS=Homo sapiens GN=RBBP8 PE=1 SV=2	1	1	2	0.966
	SP://P43686	PRS6B_HUMAN 26S protease regulatory subunit 6B OS=Homo sapiens GN=PSMC4 PE=1 SV=2	1	1	10	0.964
	SP://P49902	5NTC_HUMAN Cytosolic purine 5__nucleotidase OS=Homo sapiens GN=NT5C2 PE=1 SV=1	1	1	3	0.964
	SP://Q15738	NSDHL_HUMAN Sterol_4_alpha_carboxylate 3_dehydrogenase_ decarboxylating OS=Homo sapiens GN=NSDHL PE=1 SV=2	1	1	2	0.964
	SP://Q14527	HLTF_HUMAN Helicase_like transcription factor OS=Homo sapiens GN=HLTF PE=1 SV=2	1	2	2	0.964
	SP://Q53H82	LACB2_HUMAN Beta_lactamase_like protein 2 OS=Homo sapiens GN=LACTB2 PE=1 SV=2	1	1	6	0.963
	SP://P0CG20	CP011_HUMAN Uncharacterized protein C16orf11 OS=Homo sapiens GN=C16orf11 PE=2 SV=1	1	1	2	0.96
	SP://P18505	GBRB1_HUMAN Gamma_aminobutyric acid receptor subunit beta_1 OS=Homo sapiens GN=GABRB1 PE=1 SV=2	1	1	2	0.96
	SP://Q14194	DPYL1_HUMAN Dihydropyrimidinase_related protein 1 OS=Homo sapiens GN=CRMP1 PE=1 SV=1	1	2	22	0.959
	SP://Q14195	DPYL3_HUMAN Dihydropyrimidinase_related protein 3 OS=Homo sapiens GN=DPYSL3 PE=1 SV=1	1	2	22	0.959
	SP://Q9H0B8	CRLD2_HUMAN Cysteine_rich secretory protein LCCL domain_containing 2 OS=Homo sapiens GN=CRISPLD2 PE=1 SV=1	1	1	5	0.957
	SP://Q15649	ZNHI3_HUMAN Zinc finger HIT domain_containing protein 3 OS=Homo sapiens GN=ZNHIT3 PE=1 SV=2	1	1	2	0.957
	SP://Q96LT4	SAMD8_HUMAN Sphingomyelin synthase_related protein 1 OS=Homo sapiens GN=SAMD8 PE=2 SV=2	1	1	2	0.957
	SP://Q96Q04	LMTK3_HUMAN Serine/threonine_protein kinase LMTK3 OS=Homo sapiens GN=LMTK3 PE=2 SV=2	1	1	2	0.957
	SP://O94964	K0889_HUMAN Uncharacterized protein KIAA0889 OS=Homo sapiens GN=KIAA0889 PE=1 SV=2	1	1	4	0.955
	SP://Q96GU1	GGEE1_HUMAN G antigen family E member 1 OS=Homo sapiens GN=PAGE5 PE=2 SV=2	1	1	20	0.954
	SP://P54277	PMS1_HUMAN PMS1 protein homolog 1 OS=Homo sapiens GN=PMS1 PE=1 SV=1	1	1	3	0.954
	SP://O15212	PFD6_HUMAN Prefoldin subunit 6 OS=Homo sapiens GN=PFDN6 PE=1 SV=1	1	1	8	0.952
	SP://Q9Y2S0	RPAC2_HUMAN DNA_directed RNA polymerases I and III subunit RPAC2 OS=Homo sapiens GN=POLR1D PE=1 SV=1	1	1	3	0.952
	SP://O75764	TCEA3_HUMAN Transcription elongation factor A protein 3 OS=Homo sapiens GN=TCEA3 PE=2 SV=2	1	1	2	0.95
	SP://Q92917	GPKOW_HUMAN G patch domain and KOW motifs_containing protein OS=Homo sapiens GN=GPKOW PE=1 SV=2	1	1	2	0.949
	SP://Q6P3X8	PGBD2_HUMAN PiggyBac transposable element_derived protein 2 OS=Homo sapiens GN=PGBD2 PE=2 SV=1	1	2	2	0.948
	SP://Q9Y6W5	WASF2_HUMAN Wiskott_Aldrich syndrome protein family member 2 OS=Homo sapiens GN=WASF2 PE=1 SV=3	1	2	6	0.945
	SP://Q13523	PRP4B_HUMAN Serine/threonine_protein kinase PRP4 homolog OS=Homo sapiens GN=PRPF4B PE=1 SV=3	1	1	3	0.942
	SP://Q8TEW8	PAR3L_HUMAN Partitioning defective 3 homolog B OS=Homo sapiens GN=PARD3B PE=1 SV=2	1	1	2	0.942
	SP://P00738	HPT_HUMAN Haptoglobin OS=Homo sapiens GN=HP PE=1 SV=1	1	2	5	0.941
	SP://P00739	HPTR_HUMAN Haptoglobin_related protein OS=Homo sapiens GN=HPR PE=1 SV=2	1	2	5	0.941
	SP://P55010	IF5_HUMAN Eukaryotic translation initiation factor 5 OS=Homo sapiens GN=EIF5 PE=1 SV=2	1	1	18	0.94
	SP://Q8NFH4	NUP37_HUMAN Nucleoporin Nup37 OS=Homo sapiens GN=NUP37 PE=1 SV=1	1	1	5	0.936
	SP://P61970	NTF2_HUMAN Nuclear transport factor 2 OS=Homo sapiens GN=NUTF2 PE=1 SV=1	1	2	9	0.935
	SP://Q96AV8	E2F7_HUMAN Transcription factor E2F7 OS=Homo sapiens GN=E2F7 PE=1 SV=3	1	1	5	0.935
	SP://Q5VWN6	F208B_HUMAN Protein FAM208B OS=Homo sapiens GN=FAM208B PE=1 SV=1	1	1	2	0.935
	SP://Q8TDD5	MCLN3_HUMAN Mucolipin_3 OS=Homo sapiens GN=MCOLN3 PE=2 SV=1	1	1	2	0.935
	SP://Q9Y2A7	NCKP1_HUMAN Nck_associated protein 1 OS=Homo sapiens GN=NCKAP1 PE=1 SV=1	1	1	2	0.935
	SP://Q16658	FSCN1_HUMAN Fascin OS=Homo sapiens GN=FSCN1 PE=1 SV=3	1	1	10	0.934
	SP://P60953	CDC42_HUMAN Cell division control protein 42 homolog OS=Homo sapiens GN=CDC42 PE=1 SV=2	1	2	2	0.934
	SP://P23229	ITA6_HUMAN Integrin alpha_6 OS=Homo sapiens GN=ITGA6 PE=1 SV=4	1	1	2	0.933
	SP://Q32MZ4	LRRF1_HUMAN Leucine_rich repeat flightless_interacting protein 1 OS=Homo sapiens GN=LRRFIP1 PE=1 SV=2	1	1	2	0.933
	SP://Q7Z5M5	TMC3_HUMAN Transmembrane channel_like protein 3 OS=Homo sapiens GN=TMC3 PE=1 SV=3	1	1	2	0.931
	SP://Q16650	TBR1_HUMAN T_box brain protein 1 OS=Homo sapiens GN=TBR1 PE=1 SV=1	1	1	9	0.93
	SP://A6NM62	LRC53_HUMAN Leucine_rich repeat_containing protein 53 OS=Homo sapiens GN=LRRC53 PE=4 SV=2	1	1	7	0.93
	SP://Q8WZA0	LZIC_HUMAN Protein LZIC OS=Homo sapiens GN=LZIC PE=1 SV=1	1	1	3	0.93
	SP://O43670	ZN207_HUMAN Zinc finger protein 207 OS=Homo sapiens GN=ZNF207 PE=1 SV=1	1	1	11	0.928
	SP://Q8N8A2	ANR44_HUMAN Serine/threonine_protein phosphatase 6 regulatory ankyrin repeat subunit B OS=Homo sapiens GN=ANKRD44 PE=1 SV=3	1	2	6	0.924
	SP://A8MQ27	NEU1B_HUMAN E3 ubiquitin_protein ligase NEURL1B OS=Homo sapiens GN=NEURL1B PE=3 SV=1	1	1	6	0.923
	SP://P35247	SFTPD_HUMAN Pulmonary surfactant_associated protein D OS=Homo sapiens GN=SFTPD PE=1 SV=3	1	1	3	0.923
	SP://O95626	AN32D_HUMAN Acidic leucine_rich nuclear phosphoprotein 32 family member D OS=Homo sapiens GN=ANP32D PE=1 SV=2	1	2	9	0.922
	SP://Q9BQA1	MEP50_HUMAN Methylosome protein 50 OS=Homo sapiens GN=WDR77 PE=1 SV=1	1	1	4	0.922
	SP://P47914	RL29_HUMAN 60S ribosomal protein L29 OS=Homo sapiens GN=RPL29 PE=1 SV=2	1	1	28	0.921
	SP://P05455	LA_HUMAN Lupus La protein OS=Homo sapiens GN=SSB PE=1 SV=2	1	1	12	0.918
	SP://Q7Z601	GP142_HUMAN Probable G_protein coupled receptor 142 OS=Homo sapiens GN=GPR142 PE=2 SV=1	1	2	8	0.918
	SP://Q9UQE7	SMC3_HUMAN Structural maintenance of chromosomes protein 3 OS=Homo sapiens GN=SMC3 PE=1 SV=2	1	1	3	0.917
	SP://Q07955	SRSF1_HUMAN Serine/arginine_rich splicing factor 1 OS=Homo sapiens GN=SRSF1 PE=1 SV=2	1	1	10	0.916
	SP://Q8N0S2	SYCE1_HUMAN Synaptonemal complex central element protein 1 OS=Homo sapiens GN=SYCE1 PE=2 SV=2	1	1	6	0.914
	SP://Q9UQ35	SRRM2_HUMAN Serine/arginine repetitive matrix protein 2 OS=Homo sapiens GN=SRRM2 PE=1 SV=2	1	1	14	0.911
	SP://Q96LB3	IFT74_HUMAN Intraflagellar transport protein 74 homolog OS=Homo sapiens GN=IFT74 PE=2 SV=1	1	1	4	0.911
	SP://P53814	SMTN_HUMAN Smoothelin OS=Homo sapiens GN=SMTN PE=1 SV=7	1	1	3	0.911
	SP://Q33E94	RFX4_HUMAN Transcription factor RFX4 OS=Homo sapiens GN=RFX4 PE=1 SV=2	1	1	3	0.91
	SP://O43909	EXTL3_HUMAN Exostosin_like 3 OS=Homo sapiens GN=EXTL3 PE=2 SV=1	1	2	16	0.909
	SP://P62714	PP2AB_HUMAN Serine/threonine_protein phosphatase 2A catalytic subunit beta isoform OS=Homo sapiens GN=PPP2CB PE=1 SV=1	1	2	17	0.908
	SP://P67775	PP2AA_HUMAN Serine/threonine_protein phosphatase 2A catalytic subunit alpha isoform OS=Homo sapiens GN=PPP2CA PE=1 SV=1	1	2	17	0.908
	SP://Q9NVV0	TM38B_HUMAN Trimeric intracellular cation channel type B OS=Homo sapiens GN=TMEM38B PE=1 SV=1	1	1	2	0.908
	SP://Q8IZD0	SAM14_HUMAN Sterile alpha motif domain_containing protein 14 OS=Homo sapiens GN=SAMD14 PE=2 SV=2	1	1	2	0.907
	SP://Q14697	GANAB_HUMAN Neutral alpha_glucosidase AB OS=Homo sapiens GN=GANAB PE=1 SV=3	1	2	11	0.906
	SP://P49792	RBP2_HUMAN E3 SUMO_protein ligase RanBP2 OS=Homo sapiens GN=RANBP2 PE=1 SV=2	1	2	4	0.906
	SP://Q9H853	TBA4B_HUMAN Putative tubulin_like protein alpha_4B OS=Homo sapiens GN=TUBA4B PE=5 SV=2	1	1	33	0.905
	SP://P0C862	C1T9A_HUMAN Complement C1q and tumor necrosis factor_related protein 9A OS=Homo sapiens GN=C1QTNF9 PE=1 SV=1	1	1	23	0.904
	SP://Q15397	K0020_HUMAN Pumilio domain_containing protein KIAA0020 OS=Homo sapiens GN=KIAA0020 PE=1 SV=3	1	1	15	0.904
	SP://Q9Y5N6	ORC6_HUMAN Origin recognition complex subunit 6 OS=Homo sapiens GN=ORC6 PE=1 SV=1	1	1	6	0.904
	SP://Q7Z460	CLAP1_HUMAN CLIP_associating protein 1 OS=Homo sapiens GN=CLASP1 PE=1 SV=1	1	1	3	0.904
	SP://P24385	CCND1_HUMAN G1/S_specific cyclin_D1 OS=Homo sapiens GN=CCND1 PE=1 SV=1	1	1	2	0.904
	SP://Q14667	K0100_HUMAN UPF0378 protein KIAA0100 OS=Homo sapiens GN=KIAA0100 PE=1 SV=3	1	1	2	0.904
	SP://Q9NWU5	RM22_HUMAN 39S ribosomal protein L22_ mitochondrial OS=Homo sapiens GN=MRPL22 PE=1 SV=1	1	2	2	0.904
	SP://P62841	RS15_HUMAN 40S ribosomal protein S15 OS=Homo sapiens GN=RPS15 PE=1 SV=2	1	1	26	0.903
	SP://P48378	RFX2_HUMAN DNA_binding protein RFX2 OS=Homo sapiens GN=RFX2 PE=2 SV=2	1	1	3	0.903
	SP://A6NNZ2	TBB8B_HUMAN Tubulin beta_8 chain B OS=Homo sapiens PE=1 SV=1	1	6	119	0.901
	SP://Q3ZCM7	TBB8_HUMAN Tubulin beta_8 chain OS=Homo sapiens GN=TUBB8 PE=1 SV=2	1	6	119	0.901
	SP://Q6P2D8	XRRA1_HUMAN X_ray radiation resistance_associated protein 1 OS=Homo sapiens GN=XRRA1 PE=2 SV=2	1	1	27	0.901
	SP://P09211	GSTP1_HUMAN Glutathione S_transferase P OS=Homo sapiens GN=GSTP1 PE=1 SV=2	1	3	63	0.9
	SP://Q5T6S3	PHF19_HUMAN PHD finger protein 19 OS=Homo sapiens GN=PHF19 PE=1 SV=1	1	1	4	0.9
	SP://P51858	HDGF_HUMAN Hepatoma_derived growth factor OS=Homo sapiens GN=HDGF PE=1 SV=1	1	1	13	0.899
	SP://A4D1S0	KLRG2_HUMAN Killer cell lectin_like receptor subfamily G member 2 OS=Homo sapiens GN=KLRG2 PE=1 SV=3	1	1	16	0.898
	SP://Q96GD3	SCMH1_HUMAN Polycomb protein SCMH1 OS=Homo sapiens GN=SCMH1 PE=1 SV=1	1	1	2	0.898
	SP://P11177	ODPB_HUMAN Pyruvate dehydrogenase E1 component subunit beta_ mitochondrial OS=Homo sapiens GN=PDHB PE=1 SV=3	1	1	3	0.897
	SP://P14678	RSMB_HUMAN Small nuclear ribonucleoprotein_associated proteins B and B_ OS=Homo sapiens GN=SNRPB PE=1 SV=2	1	1	3	0.896
	SP://P63162	RSMN_HUMAN Small nuclear ribonucleoprotein_associated protein N OS=Homo sapiens GN=SNRPN PE=1 SV=1	1	1	3	0.896
	SP://Q99590	SCAFB_HUMAN Protein SCAF11 OS=Homo sapiens GN=SCAF11 PE=1 SV=2	1	1	2	0.896
	SP://O94788	AL1A2_HUMAN Retinal dehydrogenase 2 OS=Homo sapiens GN=ALDH1A2 PE=1 SV=3	1	1	20	0.895
	SP://P02008	HBAZ_HUMAN Hemoglobin subunit zeta OS=Homo sapiens GN=HBZ PE=1 SV=2	1	1	6	0.893
	SP://Q9NQW7	XPP1_HUMAN Xaa_Pro aminopeptidase 1 OS=Homo sapiens GN=XPNPEP1 PE=1 SV=3	1	1	7	0.891
	SP://Q9C0A1	ZFHX2_HUMAN Zinc finger homeobox protein 2 OS=Homo sapiens GN=ZFHX2 PE=2 SV=3	1	1	3	0.891
	SP://Q15459	SF3A1_HUMAN Splicing factor 3A subunit 1 OS=Homo sapiens GN=SF3A1 PE=1 SV=1	1	2	14	0.89
	SP://Q8TF66	LRC15_HUMAN Leucine_rich repeat_containing protein 15 OS=Homo sapiens GN=LRRC15 PE=1 SV=2	1	2	9	0.89
	SP://Q6NWY9	PR40B_HUMAN Pre_mRNA_processing factor 40 homolog B OS=Homo sapiens GN=PRPF40B PE=1 SV=1	1	1	3	0.89
	SP://O43488	ARK72_HUMAN Aflatoxin B1 aldehyde reductase member 2 OS=Homo sapiens GN=AKR7A2 PE=1 SV=3	1	2	3	0.89
	SP://Q15428	SF3A2_HUMAN Splicing factor 3A subunit 2 OS=Homo sapiens GN=SF3A2 PE=1 SV=2	1	2	18	0.886
	SP://Q8NFW8	NEUA_HUMAN N_acylneuraminate cytidylyltransferase OS=Homo sapiens GN=CMAS PE=1 SV=2	1	1	2	0.886
	SP://Q96PB1	CASD1_HUMAN CAS1 domain_containing protein 1 OS=Homo sapiens GN=CASD1 PE=2 SV=1	1	2	2	0.886
	SP://Q9BY32	ITPA_HUMAN Inosine triphosphate pyrophosphatase OS=Homo sapiens GN=ITPA PE=1 SV=2	1	2	9	0.885
	SP://P35900	K1C20_HUMAN Keratin_ type I cytoskeletal 20 OS=Homo sapiens GN=KRT20 PE=1 SV=1	1	3	7	0.885
	SP://Q6PRD1	GP179_HUMAN Probable G_protein coupled receptor 179 OS=Homo sapiens GN=GPR179 PE=2 SV=2	1	3	5	0.885
	SP://P58107	EPIPL_HUMAN Epiplakin OS=Homo sapiens GN=EPPK1 PE=1 SV=2	1	1	2	0.884
	SP://Q92698	RAD54_HUMAN DNA repair and recombination protein RAD54_like OS=Homo sapiens GN=RAD54L PE=1 SV=2	1	1	6	0.883
	SP://Q86YS3	RFIP4_HUMAN Rab11 family_interacting protein 4 OS=Homo sapiens GN=RAB11FIP4 PE=1 SV=1	1	1	6	0.882
	SP://Q13126	MTAP_HUMAN S_methyl_5__thioadenosine phosphorylase OS=Homo sapiens GN=MTAP PE=1 SV=2	1	1	5	0.882
	SP://Q5T890	RAD26_HUMAN Putative DNA repair and recombination protein RAD26_like OS=Homo sapiens GN=RAD26L PE=1 SV=1	1	1	2	0.882
	SP://Q9BVK2	ALG8_HUMAN Probable dolichyl pyrophosphate Glc1Man9GlcNAc2 alpha_1_3_glucosyltransferase OS=Homo sapiens GN=ALG8 PE=1 SV=2	1	1	2	0.882
	SP://Q96PX6	CC85A_HUMAN Coiled_coil domain_containing protein 85A OS=Homo sapiens GN=CCDC85A PE=2 SV=3	1	1	4	0.88
	SP://O95466	FMNL_HUMAN Formin_like protein 1 OS=Homo sapiens GN=FMNL1 PE=1 SV=3	1	1	10	0.879
	SP://Q8NCG5	CHST4_HUMAN Carbohydrate sulfotransferase 4 OS=Homo sapiens GN=CHST4 PE=1 SV=2	1	1	3	0.879
	SP://P46952	3HAO_HUMAN 3_hydroxyanthranilate 3_4_dioxygenase OS=Homo sapiens GN=HAAO PE=1 SV=2	1	1	2	0.879
	SP://Q8N4T4	CI100_HUMAN Vav_like protein C9orf100 OS=Homo sapiens GN=C9orf100 PE=2 SV=1	1	1	2	0.879
	SP://Q8N7P1	PLD5_HUMAN Inactive phospholipase D5 OS=Homo sapiens GN=PLD5 PE=2 SV=2	1	1	2	0.878
	SP://P68036	UB2L3_HUMAN Ubiquitin_conjugating enzyme E2 L3 OS=Homo sapiens GN=UBE2L3 PE=1 SV=1	1	3	24	0.877
	SP://P84090	ERH_HUMAN Enhancer of rudimentary homolog OS=Homo sapiens GN=ERH PE=1 SV=1	1	1	4	0.877
	SP://Q04759	KPCT_HUMAN Protein kinase C theta type OS=Homo sapiens GN=PRKCQ PE=1 SV=3	1	1	2	0.876
	SP://Q8WXA3	RUFY2_HUMAN RUN and FYVE domain_containing protein 2 OS=Homo sapiens GN=RUFY2 PE=1 SV=2	1	1	4	0.875
	SP://Q6IQ32	ADNP2_HUMAN ADNP homeobox protein 2 OS=Homo sapiens GN=ADNP2 PE=1 SV=1	1	1	3	0.875
	SP://Q96ST8	CEP89_HUMAN Centrosomal protein of 89 kDa OS=Homo sapiens GN=CEP89 PE=1 SV=3	1	2	2	0.874
	SP://P62310	LSM3_HUMAN U6 snRNA_associated Sm_like protein LSm3 OS=Homo sapiens GN=LSM3 PE=1 SV=2	1	1	6	0.873
	SP://Q8IVF5	TIAM2_HUMAN T_lymphoma invasion and metastasis_inducing protein 2 OS=Homo sapiens GN=TIAM2 PE=2 SV=4	1	2	3	0.872
	SP://Q5U5Z8	CBPC2_HUMAN Cytosolic carboxypeptidase 2 OS=Homo sapiens GN=AGBL2 PE=2 SV=2	1	1	9	0.87
	SP://Q63HN8	RN213_HUMAN E3 ubiquitin_protein ligase RNF213 OS=Homo sapiens GN=RNF213 PE=1 SV=3	1	2	2	0.87
	SP://Q69YN4	VIR_HUMAN Protein virilizer homolog OS=Homo sapiens GN=KIAA1429 PE=1 SV=2	1	2	32	0.869
	SP://C9JLR9	CK095_HUMAN Uncharacterized protein C11orf95 OS=Homo sapiens GN=C11orf95 PE=2 SV=1	1	1	2	0.868
	SP://Q7Z407	CSMD3_HUMAN CUB and sushi domain_containing protein 3 OS=Homo sapiens GN=CSMD3 PE=2 SV=3	1	1	2	0.868
	SP://Q8NF50	DOCK8_HUMAN Dedicator of cytokinesis protein 8 OS=Homo sapiens GN=DOCK8 PE=1 SV=3	1	1	2	0.865
	SP://Q99801	NKX31_HUMAN Homeobox protein Nkx_3.1 OS=Homo sapiens GN=NKX3_1 PE=1 SV=2	1	1	2	0.865
	SP://P33992	MCM5_HUMAN DNA replication licensing factor MCM5 OS=Homo sapiens GN=MCM5 PE=1 SV=5	1	1	13	0.863
	SP://Q9H6L5	F134B_HUMAN Protein FAM134B OS=Homo sapiens GN=FAM134B PE=2 SV=1	1	1	6	0.863
	SP://Q01959	SC6A3_HUMAN Sodium_dependent dopamine transporter OS=Homo sapiens GN=SLC6A3 PE=1 SV=1	1	1	3	0.863
	SP://B2RXH2	KDM4E_HUMAN Lysine_specific demethylase 4E OS=Homo sapiens GN=KDM4E PE=1 SV=1	1	1	2	0.863
	SP://Q9UBS9	OSPT_HUMAN Protein osteopotentia homolog OS=Homo sapiens GN=C1orf9 PE=2 SV=1	1	1	2	0.862
	SP://P26373	RL13_HUMAN 60S ribosomal protein L13 OS=Homo sapiens GN=RPL13 PE=1 SV=4	1	1	41	0.861
	SP://Q6P5R6	RL22L_HUMAN 60S ribosomal protein L22_like 1 OS=Homo sapiens GN=RPL22L1 PE=1 SV=2	1	1	8	0.859
	SP://O75506	HSBP1_HUMAN Heat shock factor_binding protein 1 OS=Homo sapiens GN=HSBP1 PE=1 SV=1	1	1	7	0.858
	SP://P16157	ANK1_HUMAN Ankyrin_1 OS=Homo sapiens GN=ANK1 PE=1 SV=3	1	1	2	0.858
	SP://Q63ZY3	KANK2_HUMAN KN motif and ankyrin repeat domain_containing protein 2 OS=Homo sapiens GN=KANK2 PE=1 SV=1	1	1	2	0.858
	SP://Q13501	SQSTM_HUMAN Sequestosome_1 OS=Homo sapiens GN=SQSTM1 PE=1 SV=1	1	1	21	0.855
	SP://Q08043	ACTN3_HUMAN Alpha_actinin_3 OS=Homo sapiens GN=ACTN3 PE=1 SV=2	1	1	6	0.855
	SP://Q04609	FOLH1_HUMAN Glutamate carboxypeptidase 2 OS=Homo sapiens GN=FOLH1 PE=1 SV=1	1	1	2	0.855
	SP://P51572	BAP31_HUMAN B_cell receptor_associated protein 31 OS=Homo sapiens GN=BCAP31 PE=1 SV=3	1	1	14	0.853
	SP://Q5M775	CYTSB_HUMAN Cytospin_B OS=Homo sapiens GN=SPECC1 PE=1 SV=1	1	1	4	0.853
	SP://Q00341	VIGLN_HUMAN Vigilin OS=Homo sapiens GN=HDLBP PE=1 SV=2	1	1	3	0.853
	SP://O60287	NPA1P_HUMAN Nucleolar pre_ribosomal_associated protein 1 OS=Homo sapiens GN=URB1 PE=1 SV=4	1	1	2	0.853
	SP://Q8ND07	CN045_HUMAN Uncharacterized protein C14orf45 OS=Homo sapiens GN=C14orf45 PE=1 SV=3	1	1	2	0.853
	SP://Q01538	MYT1_HUMAN Myelin transcription factor 1 OS=Homo sapiens GN=MYT1 PE=1 SV=2	1	1	2	0.853
	SP://Q96LA5	FCRL2_HUMAN Fc receptor_like protein 2 OS=Homo sapiens GN=FCRL2 PE=1 SV=1	1	1	2	0.851
	SP://Q9C099	LRCC1_HUMAN Leucine_rich repeat and coiled_coil domain_containing protein 1 OS=Homo sapiens GN=LRRCC1 PE=2 SV=2	1	1	7	0.85
	SP://O75054	IGSF3_HUMAN Immunoglobulin superfamily member 3 OS=Homo sapiens GN=IGSF3 PE=1 SV=3	1	2	5	0.85
	SP://O15247	CLIC2_HUMAN Chloride intracellular channel protein 2 OS=Homo sapiens GN=CLIC2 PE=1 SV=3	1	1	4	0.85
	SP://Q92765	SFRP3_HUMAN Secreted frizzled_related protein 3 OS=Homo sapiens GN=FRZB PE=1 SV=2	1	1	4	0.85
	SP://P09001	RM03_HUMAN 39S ribosomal protein L3_ mitochondrial OS=Homo sapiens GN=MRPL3 PE=1 SV=1	1	2	2	0.85
	SP://Q8WWL2	SPIR2_HUMAN Protein spire homolog 2 OS=Homo sapiens GN=SPIRE2 PE=1 SV=3	1	1	2	0.85
	SP://Q8NB90	SPAT5_HUMAN Spermatogenesis_associated protein 5 OS=Homo sapiens GN=SPATA5 PE=1 SV=3	1	1	12	0.848
	SP://P62158	CALM_HUMAN Calmodulin OS=Homo sapiens GN=CALM1 PE=1 SV=2	1	1	6	0.844
	SP://P48739	PIPNB_HUMAN Phosphatidylinositol transfer protein beta isoform OS=Homo sapiens GN=PITPNB PE=1 SV=2	1	1	7	0.843
	SP://Q9C075	K1C23_HUMAN Keratin_ type I cytoskeletal 23 OS=Homo sapiens GN=KRT23 PE=1 SV=2	1	1	8	0.841
	SP://Q9C0A0	CNTP4_HUMAN Contactin_associated protein_like 4 OS=Homo sapiens GN=CNTNAP4 PE=1 SV=3	1	1	3	0.841
	SP://Q13621	S12A1_HUMAN Solute carrier family 12 member 1 OS=Homo sapiens GN=SLC12A1 PE=1 SV=2	1	1	3	0.833
	SP://P51784	UBP11_HUMAN Ubiquitin carboxyl_terminal hydrolase 11 OS=Homo sapiens GN=USP11 PE=1 SV=3	1	1	2	0.83
	SP://P35606	COPB2_HUMAN Coatomer subunit beta_ OS=Homo sapiens GN=COPB2 PE=1 SV=2	1	1	8	0.822
	SP://Q8IZ69	TRM2A_HUMAN tRNA (uracil_5_)_methyltransferase homolog A OS=Homo sapiens GN=TRMT2A PE=1 SV=2	1	1	5	0.822
	SP://Q9BX63	FANCJ_HUMAN Fanconi anemia group J protein OS=Homo sapiens GN=BRIP1 PE=1 SV=1	1	1	2	0.822
	SP://Q9BY07	S4A5_HUMAN Electrogenic sodium bicarbonate cotransporter 4 OS=Homo sapiens GN=SLC4A5 PE=2 SV=2	1	1	2	0.822
	SP://P20700	LMNB1_HUMAN Lamin_B1 OS=Homo sapiens GN=LMNB1 PE=1 SV=2	1	2	4	0.82
	SP://O60841	IF2P_HUMAN Eukaryotic translation initiation factor 5B OS=Homo sapiens GN=EIF5B PE=1 SV=4	1	1	4	0.82
	SP://Q8IZJ3	CPMD8_HUMAN C3 and PZP_like alpha_2_macroglobulin domain_containing protein 8 OS=Homo sapiens GN=CPAMD8 PE=1 SV=2	1	2	21	0.818
	SP://P52788	SPSY_HUMAN Spermine synthase OS=Homo sapiens GN=SMS PE=1 SV=2	1	2	8	0.818
	SP://Q6ZQR2	CI171_HUMAN Uncharacterized protein C9orf171 OS=Homo sapiens GN=C9orf171 PE=2 SV=1	1	1	6	0.816
	SP://A8MTJ3	GNAT3_HUMAN Guanine nucleotide_binding protein G(t) subunit alpha_3 OS=Homo sapiens GN=GNAT3 PE=2 SV=2	1	1	3	0.815
	SP://P43034	LIS1_HUMAN Platelet_activating factor acetylhydrolase IB subunit alpha OS=Homo sapiens GN=PAFAH1B1 PE=1 SV=2	1	2	11	0.814
	SP://Q9UMS6	SYNP2_HUMAN Synaptopodin_2 OS=Homo sapiens GN=SYNPO2 PE=1 SV=2	1	1	2	0.812
	SP://P00441	SODC_HUMAN Superoxide dismutase [Cu_Zn] OS=Homo sapiens GN=SOD1 PE=1 SV=2	1	1	24	0.81
	SP://Q15819	UB2V2_HUMAN Ubiquitin_conjugating enzyme E2 variant 2 OS=Homo sapiens GN=UBE2V2 PE=1 SV=4	1	2	24	0.81
	SP://P63241	IF5A1_HUMAN Eukaryotic translation initiation factor 5A_1 OS=Homo sapiens GN=EIF5A PE=1 SV=2	1	3	53	0.807
	SP://P41743	KPCI_HUMAN Protein kinase C iota type OS=Homo sapiens GN=PRKCI PE=1 SV=2	1	1	3	0.806
	SP://Q17RD7	SYT16_HUMAN Synaptotagmin_16 OS=Homo sapiens GN=SYT16 PE=2 SV=2	1	2	2	0.805
	SP://Q9Y696	CLIC4_HUMAN Chloride intracellular channel protein 4 OS=Homo sapiens GN=CLIC4 PE=1 SV=4	1	1	2	0.804
	SP://Q6ZN28	MACC1_HUMAN Metastasis_associated in colon cancer protein 1 OS=Homo sapiens GN=MACC1 PE=1 SV=2	1	1	6	0.801
	SP://P52907	CAZA1_HUMAN F_actin_capping protein subunit alpha_1 OS=Homo sapiens GN=CAPZA1 PE=1 SV=3	1	2	25	0.799
	SP://P06396	GELS_HUMAN Gelsolin OS=Homo sapiens GN=GSN PE=1 SV=1	1	2	14	0.799
	SP://P62495	ERF1_HUMAN Eukaryotic peptide chain release factor subunit 1 OS=Homo sapiens GN=ETF1 PE=1 SV=3	1	2	10	0.799
	SP://Q9UBC5	MYO1A_HUMAN Unconventional myosin_Ia OS=Homo sapiens GN=MYO1A PE=1 SV=1	1	1	5	0.798
	SP://Q9BU76	MMTA2_HUMAN Multiple myeloma tumor_associated protein 2 OS=Homo sapiens GN=MMTAG2 PE=1 SV=1	1	1	4	0.798
	SP://Q96JJ3	ELMO2_HUMAN Engulfment and cell motility protein 2 OS=Homo sapiens GN=ELMO2 PE=1 SV=2	1	1	2	0.798
	SP://Q9GZU0	CF062_HUMAN Uncharacterized protein C6orf62 OS=Homo sapiens GN=C6orf62 PE=2 SV=1	1	1	2	0.798
	SP://O75787	RENR_HUMAN Renin receptor OS=Homo sapiens GN=ATP6AP2 PE=1 SV=2	1	1	6	0.795
	SP://Q8WWZ4	ABCAA_HUMAN ATP_binding cassette sub_family A member 10 OS=Homo sapiens GN=ABCA10 PE=1 SV=3	1	1	9	0.794
	SP://Q14031	CO4A6_HUMAN Collagen alpha_6(IV) chain OS=Homo sapiens GN=COL4A6 PE=2 SV=3	1	2	4	0.793
	SP://Q16851	UGPA_HUMAN UTP__glucose_1_phosphate uridylyltransferase OS=Homo sapiens GN=UGP2 PE=1 SV=5	1	1	9	0.791
	SP://Q92766	RREB1_HUMAN Ras_responsive element_binding protein 1 OS=Homo sapiens GN=RREB1 PE=1 SV=3	1	2	8	0.79
	SP://Q13520	AQP6_HUMAN Aquaporin_6 OS=Homo sapiens GN=AQP6 PE=2 SV=2	1	1	2	0.79
	SP://P31689	DNJA1_HUMAN DnaJ homolog subfamily A member 1 OS=Homo sapiens GN=DNAJA1 PE=1 SV=2	1	2	31	0.781
	SP://Q8NI35	INADL_HUMAN InaD_like protein OS=Homo sapiens GN=INADL PE=1 SV=3	1	1	2	0.777
	SP://P62888	RL30_HUMAN 60S ribosomal protein L30 OS=Homo sapiens GN=RPL30 PE=1 SV=2	1	1	22	0.776
	SP://Q02224	CENPE_HUMAN Centromere_associated protein E OS=Homo sapiens GN=CENPE PE=1 SV=2	1	1	5	0.776
	SP://Q9ULI0	ATD2B_HUMAN ATPase family AAA domain_containing protein 2B OS=Homo sapiens GN=ATAD2B PE=1 SV=3	1	1	2	0.776
	SP://Q8IWB6	TEX14_HUMAN Inactive serine/threonine_protein kinase TEX14 OS=Homo sapiens GN=TEX14 PE=1 SV=2	1	1	15	0.773
	SP://Q96LB4	VATG3_HUMAN V_type proton ATPase subunit G 3 OS=Homo sapiens GN=ATP6V1G3 PE=2 SV=1	1	1	8	0.773
	SP://Q9GZS0	DNAI2_HUMAN Dynein intermediate chain 2_ axonemal OS=Homo sapiens GN=DNAI2 PE=1 SV=2	1	1	8	0.773
	SP://O75197	LRP5_HUMAN Low_density lipoprotein receptor_related protein 5 OS=Homo sapiens GN=LRP5 PE=1 SV=2	1	1	2	0.768
	SP://Q9Y6F7	CDY2_HUMAN Testis_specific chromodomain protein Y 2 OS=Homo sapiens GN=CDY2A PE=1 SV=1	1	1	26	0.763
	SP://Q9Y6F8	CDY1_HUMAN Testis_specific chromodomain protein Y 1 OS=Homo sapiens GN=CDY1 PE=1 SV=1	1	1	26	0.763
	SP://P55198	AF17_HUMAN Protein AF_17 OS=Homo sapiens GN=MLLT6 PE=1 SV=2	1	1	14	0.763
	SP://P29475	NOS1_HUMAN Nitric oxide synthase_ brain OS=Homo sapiens GN=NOS1 PE=1 SV=2	1	1	3	0.763
	SP://O95163	ELP1_HUMAN Elongator complex protein 1 OS=Homo sapiens GN=IKBKAP PE=1 SV=3	1	1	2	0.761
	SP://P61513	RL37A_HUMAN 60S ribosomal protein L37a OS=Homo sapiens GN=RPL37A PE=1 SV=2	1	1	7	0.758
	SP://Q8NE63	HIPK4_HUMAN Homeodomain_interacting protein kinase 4 OS=Homo sapiens GN=HIPK4 PE=2 SV=1	1	1	2	0.758
	SP://Q8IY92	SLX4_HUMAN Structure_specific endonuclease subunit SLX4 OS=Homo sapiens GN=SLX4 PE=1 SV=3	1	1	6	0.757
	SP://O76094	SRP72_HUMAN Signal recognition particle 72 kDa protein OS=Homo sapiens GN=SRP72 PE=1 SV=3	1	1	12	0.756
	SP://Q2M1Z3	RHG31_HUMAN Rho GTPase_activating protein 31 OS=Homo sapiens GN=ARHGAP31 PE=1 SV=2	1	1	2	0.754
	SP://Q9GZS9	CHST5_HUMAN Carbohydrate sulfotransferase 5 OS=Homo sapiens GN=CHST5 PE=2 SV=3	1	1	3	0.748
	SP://Q9NRE2	TSH2_HUMAN Teashirt homolog 2 OS=Homo sapiens GN=TSHZ2 PE=1 SV=3	1	1	3	0.743
	SP://Q9Y2T7	YBOX2_HUMAN Y_box_binding protein 2 OS=Homo sapiens GN=YBX2 PE=1 SV=2	1	2	23	0.742
	SP://Q5F1R6	DJC21_HUMAN DnaJ homolog subfamily C member 21 OS=Homo sapiens GN=DNAJC21 PE=1 SV=2	1	1	2	0.739
	SP://Q8TDQ7	GNPI2_HUMAN Glucosamine_6_phosphate isomerase 2 OS=Homo sapiens GN=GNPDA2 PE=1 SV=1	1	1	5	0.737
	SP://Q9Y2N7	HIF3A_HUMAN Hypoxia_inducible factor 3_alpha OS=Homo sapiens GN=HIF3A PE=1 SV=2	1	1	2	0.737
	SP://Q96KK3	KCNS1_HUMAN Potassium voltage_gated channel subfamily S member 1 OS=Homo sapiens GN=KCNS1 PE=2 SV=2	1	1	11	0.732
	SP://O15498	YKT6_HUMAN Synaptobrevin homolog YKT6 OS=Homo sapiens GN=YKT6 PE=1 SV=1	1	1	11	0.73
	SP://Q9BQT9	CSTN3_HUMAN Calsyntenin_3 OS=Homo sapiens GN=CLSTN3 PE=1 SV=1	1	2	2	0.73
	SP://Q12792	TWF1_HUMAN Twinfilin_1 OS=Homo sapiens GN=TWF1 PE=1 SV=3	1	2	11	0.727
	SP://O43633	CHM2A_HUMAN Charged multivesicular body protein 2a OS=Homo sapiens GN=CHMP2A PE=1 SV=1	1	1	4	0.723
	SP://Q9GZR7	DDX24_HUMAN ATP_dependent RNA helicase DDX24 OS=Homo sapiens GN=DDX24 PE=1 SV=1	1	1	3	0.723
	SP://Q68CJ6	SLIP_HUMAN GTPase SLIP_GC OS=Homo sapiens GN=C8orf80 PE=1 SV=3	1	1	2	0.723
	SP://Q96DU9	PABP5_HUMAN Polyadenylate_binding protein 5 OS=Homo sapiens GN=PABPC5 PE=1 SV=1	1	1	10	0.721
	SP://O75400	PR40A_HUMAN Pre_mRNA_processing factor 40 homolog A OS=Homo sapiens GN=PRPF40A PE=1 SV=2	1	1	4	0.72
	SP://Q9BTW9	TBCD_HUMAN Tubulin_specific chaperone D OS=Homo sapiens GN=TBCD PE=1 SV=2	1	1	4	0.717
	SP://Q13191	CBLB_HUMAN E3 ubiquitin_protein ligase CBL_B OS=Homo sapiens GN=CBLB PE=1 SV=2	1	1	3	0.717
	SP://Q6T310	RSLBA_HUMAN Ras_like protein family member 11A OS=Homo sapiens GN=RASL11A PE=2 SV=1	1	2	3	0.716
	SP://P30086	PEBP1_HUMAN Phosphatidylethanolamine_binding protein 1 OS=Homo sapiens GN=PEBP1 PE=1 SV=3	1	1	10	0.714
	SP://Q07812	BAX_HUMAN Apoptosis regulator BAX OS=Homo sapiens GN=BAX PE=1 SV=1	1	1	5	0.714
	SP://Q9UQM7	KCC2A_HUMAN Calcium/calmodulin_dependent protein kinase type II subunit alpha OS=Homo sapiens GN=CAMK2A PE=1 SV=2	1	1	4	0.711
	SP://P31949	S10AB_HUMAN Protein S100_A11 OS=Homo sapiens GN=S100A11 PE=1 SV=2	1	2	41	0.705
	SP://Q96HJ3	CCD34_HUMAN Coiled_coil domain_containing protein 34 OS=Homo sapiens GN=CCDC34 PE=2 SV=2	1	1	3	0.705
	SP://P50454	SERPH_HUMAN Serpin H1 OS=Homo sapiens GN=SERPINH1 PE=1 SV=2	1	1	4	0.703
	SP://P13804	ETFA_HUMAN Electron transfer flavoprotein subunit alpha_ mitochondrial OS=Homo sapiens GN=ETFA PE=1 SV=1	1	1	2	0.69
	SP://Q9NUQ6	SPS2L_HUMAN SPATS2_like protein OS=Homo sapiens GN=SPATS2L PE=1 SV=2	1	1	2	0.688
	SP://Q15942	ZYX_HUMAN Zyxin OS=Homo sapiens GN=ZYX PE=1 SV=1	1	1	11	0.682
	SP://Q8IWG1	WDR63_HUMAN WD repeat_containing protein 63 OS=Homo sapiens GN=WDR63 PE=2 SV=1	1	1	3	0.674
	SP://Q9UK76	HN1_HUMAN Hematological and neurological expressed 1 protein OS=Homo sapiens GN=HN1 PE=1 SV=3	1	1	19	0.671
	SP://Q0VF49	K2012_HUMAN Uncharacterized protein KIAA2012 OS=Homo sapiens GN=KIAA2012 PE=2 SV=1	1	1	4	0.671
	SP://P51812	KS6A3_HUMAN Ribosomal protein S6 kinase alpha_3 OS=Homo sapiens GN=RPS6KA3 PE=1 SV=1	1	1	2	0.67
	SP://Q9UK32	KS6A6_HUMAN Ribosomal protein S6 kinase alpha_6 OS=Homo sapiens GN=RPS6KA6 PE=1 SV=1	1	1	2	0.67
	SP://Q96M86	DNHD1_HUMAN Dynein heavy chain domain_containing protein 1 OS=Homo sapiens GN=DNHD1 PE=1 SV=2	1	1	9	0.665
	SP://O95294	RASL1_HUMAN RasGAP_activating_like protein 1 OS=Homo sapiens GN=RASAL1 PE=1 SV=3	1	1	5	0.663
	SP://Q9BRL6	SRSF8_HUMAN Serine/arginine_rich splicing factor 8 OS=Homo sapiens GN=SRSF8 PE=1 SV=1	1	1	11	0.662
	SP://P61081	UBC12_HUMAN NEDD8_conjugating enzyme Ubc12 OS=Homo sapiens GN=UBE2M PE=1 SV=1	1	1	3	0.661
	SP://Q9NQS7	INCE_HUMAN Inner centromere protein OS=Homo sapiens GN=INCENP PE=1 SV=3	1	1	3	0.658
	SP://Q99678	GPR20_HUMAN G_protein coupled receptor 20 OS=Homo sapiens GN=GPR20 PE=1 SV=2	1	2	7	0.657
	SP://P55201	BRPF1_HUMAN Peregrin OS=Homo sapiens GN=BRPF1 PE=1 SV=2	1	1	5	0.654
	SP://O15116	LSM1_HUMAN U6 snRNA_associated Sm_like protein LSm1 OS=Homo sapiens GN=LSM1 PE=1 SV=1	1	2	9	0.65
	SP://O15069	NACAD_HUMAN NAC_alpha domain_containing protein 1 OS=Homo sapiens GN=NACAD PE=2 SV=3	1	1	24	0.647
	SP://Q5SQI0	ATAT_HUMAN Alpha_tubulin N_acetyltransferase OS=Homo sapiens GN=ATAT1 PE=1 SV=1	1	1	2	0.647
	SP://P49023	PAXI_HUMAN Paxillin OS=Homo sapiens GN=PXN PE=1 SV=3	1	2	18	0.646
	SP://P37108	SRP14_HUMAN Signal recognition particle 14 kDa protein OS=Homo sapiens GN=SRP14 PE=1 SV=2	1	2	10	0.646
	SP://Q14202	ZMYM3_HUMAN Zinc finger MYM_type protein 3 OS=Homo sapiens GN=ZMYM3 PE=1 SV=2	1	2	5	0.646
	SP://O14639	ABLM1_HUMAN Actin_binding LIM protein 1 OS=Homo sapiens GN=ABLIM1 PE=1 SV=3	1	1	10	0.643
	SP://Q5TCY1	TTBK1_HUMAN Tau_tubulin kinase 1 OS=Homo sapiens GN=TTBK1 PE=1 SV=2	1	1	2	0.643
	SP://Q4G0J3	LARP7_HUMAN La_related protein 7 OS=Homo sapiens GN=LARP7 PE=1 SV=1	1	1	6	0.642
	SP://P52789	HXK2_HUMAN Hexokinase_2 OS=Homo sapiens GN=HK2 PE=1 SV=2	1	1	2	0.641
	SP://Q9GZZ9	UBA5_HUMAN Ubiquitin_like modifier_activating enzyme 5 OS=Homo sapiens GN=UBA5 PE=1 SV=1	1	1	5	0.637
	SP://P31040	DHSA_HUMAN Succinate dehydrogenase [ubiquinone] flavoprotein subunit_ mitochondrial OS=Homo sapiens GN=SDHA PE=1 SV=2	1	1	3	0.637
	SP://P54707	AT12A_HUMAN Potassium_transporting ATPase alpha chain 2 OS=Homo sapiens GN=ATP12A PE=2 SV=3	1	1	11	0.63
	SP://Q8TEQ0	SNX29_HUMAN Sorting nexin_29 OS=Homo sapiens GN=SNX29 PE=1 SV=3	1	2	10	0.629
	SP://Q9H094	NBPF3_HUMAN Neuroblastoma breakpoint family member 3 OS=Homo sapiens GN=NBPF3 PE=2 SV=1	1	1	3	0.629
	SP://O75570	RF1M_HUMAN Peptide chain release factor 1_ mitochondrial OS=Homo sapiens GN=MTRF1 PE=1 SV=2	1	1	2	0.629
	SP://P17066	HSP76_HUMAN Heat shock 70 kDa protein 6 OS=Homo sapiens GN=HSPA6 PE=1 SV=2	1	1	7	0.628
	SP://P48741	HSP77_HUMAN Putative heat shock 70 kDa protein 7 OS=Homo sapiens GN=HSPA7 PE=5 SV=2	1	1	7	0.628
	SP://Q8NC96	NECP1_HUMAN Adaptin ear_binding coat_associated protein 1 OS=Homo sapiens GN=NECAP1 PE=1 SV=2	1	1	2	0.628
	SP://P08218	CEL2B_HUMAN Chymotrypsin_like elastase family member 2B OS=Homo sapiens GN=CELA2B PE=2 SV=2	1	1	3	0.622
	SP://P05386	RLA1_HUMAN 60S acidic ribosomal protein P1 OS=Homo sapiens GN=RPLP1 PE=1 SV=1	1	4	38	0.613
	SP://Q1MX18	INSC_HUMAN Protein inscuteable homolog OS=Homo sapiens GN=INSC PE=1 SV=1	1	2	27	0.608
	SP://Q8N6W0	CELF5_HUMAN CUGBP Elav_like family member 5 OS=Homo sapiens GN=CELF5 PE=1 SV=1	1	2	11	0.608
	SP://P28070	PSB4_HUMAN Proteasome subunit beta type_4 OS=Homo sapiens GN=PSMB4 PE=1 SV=4	1	1	5	0.603
	SP://O00299	CLIC1_HUMAN Chloride intracellular channel protein 1 OS=Homo sapiens GN=CLIC1 PE=1 SV=4	1	1	30	0.6
	SP://Q9NPZ5	B3GA2_HUMAN Galactosylgalactosylxylosylprotein 3_beta_glucuronosyltransferase 2 OS=Homo sapiens GN=B3GAT2 PE=1 SV=2	1	1	7	0.593
	SP://Q9NSC7	SIA7A_HUMAN Alpha_N_acetylgalactosaminide alpha_2_6_sialyltransferase 1 OS=Homo sapiens GN=ST6GALNAC1 PE=1 SV=1	1	1	12	0.583
	SP://P31321	KAP1_HUMAN cAMP_dependent protein kinase type I_beta regulatory subunit OS=Homo sapiens GN=PRKAR1B PE=1 SV=4	1	1	2	0.583
	SP://Q9NRC8	SIR7_HUMAN NAD_dependent protein deacetylase sirtuin_7 OS=Homo sapiens GN=SIRT7 PE=1 SV=1	1	1	2	0.58
	SP://Q13131	AAPK1_HUMAN 5__AMP_activated protein kinase catalytic subunit alpha_1 OS=Homo sapiens GN=PRKAA1 PE=1 SV=4	1	1	6	0.577
	SP://Q6UXH9	PAMR1_HUMAN Inactive serine protease PAMR1 OS=Homo sapiens GN=PAMR1 PE=1 SV=1	1	1	10	0.574
	SP://Q8TEA1	NSUN6_HUMAN Putative methyltransferase NSUN6 OS=Homo sapiens GN=NSUN6 PE=1 SV=1	1	1	2	0.565
	SP://O75608	LYPA1_HUMAN Acyl_protein thioesterase 1 OS=Homo sapiens GN=LYPLA1 PE=1 SV=1	1	1	5	0.558
	SP://Q9BV73	CP250_HUMAN Centrosome_associated protein CEP250 OS=Homo sapiens GN=CEP250 PE=1 SV=2	1	1	3	0.54
	SP://Q12929	EPS8_HUMAN Epidermal growth factor receptor kinase substrate 8 OS=Homo sapiens GN=EPS8 PE=1 SV=1	1	1	2	0.54
	SP://Q96QK1	VPS35_HUMAN Vacuolar protein sorting_associated protein 35 OS=Homo sapiens GN=VPS35 PE=1 SV=2	1	1	3	0.535
	SP://Q5DJT8	CT452_HUMAN Cancer/testis antigen family 45 member A2 OS=Homo sapiens GN=CT45A2 PE=2 SV=2	1	1	3	0.534
	SP://Q5HYN5	CT451_HUMAN Cancer/testis antigen family 45 member A1 OS=Homo sapiens GN=CT45A1 PE=2 SV=1	1	1	3	0.534
	SP://Q6NSH3	CT455_HUMAN Cancer/testis antigen family 45 member A5 OS=Homo sapiens GN=CT45A5 PE=2 SV=1	1	1	3	0.534
	SP://Q8N7B7	CT454_HUMAN Cancer/testis antigen family 45 member A4/A6 OS=Homo sapiens GN=CT45A4 PE=2 SV=1	1	1	3	0.534
	SP://Q8NHU0	CT453_HUMAN Cancer/testis antigen family 45 member A3 OS=Homo sapiens GN=CT45A3 PE=2 SV=1	1	1	3	0.534
	SP://Q9GZU5	NYX_HUMAN Nyctalopin OS=Homo sapiens GN=NYX PE=1 SV=1	1	1	2	0.532
	SP://Q9UHK0	NUFP1_HUMAN Nuclear fragile X mental retardation_interacting protein 1 OS=Homo sapiens GN=NUFIP1 PE=1 SV=2	1	1	2	0.532
	SP://Q9UGU0	TCF20_HUMAN Transcription factor 20 OS=Homo sapiens GN=TCF20 PE=1 SV=3	1	2	2	0.528
	SP://Q7Z570	Z804A_HUMAN Zinc finger protein 804A OS=Homo sapiens GN=ZNF804A PE=1 SV=3	1	1	4	0.525
	SP://A8K855	EFCB7_HUMAN EF_hand calcium_binding domain_containing protein 7 OS=Homo sapiens GN=EFCAB7 PE=2 SV=1	1	1	3	0.517
	SP://Q05397	FAK1_HUMAN Focal adhesion kinase 1 OS=Homo sapiens GN=PTK2 PE=1 SV=2	1	1	6	0.514
	SP://P36551	HEM6_HUMAN Coproporphyrinogen_III oxidase_ mitochondrial OS=Homo sapiens GN=CPOX PE=1 SV=3	1	1	4	0.514
	SP://O60241	BAI2_HUMAN Brain_specific angiogenesis inhibitor 2 OS=Homo sapiens GN=BAI2 PE=2 SV=2	1	2	2	0.514
	SP://Q9NS93	TM7S3_HUMAN Transmembrane 7 superfamily member 3 OS=Homo sapiens GN=TM7SF3 PE=2 SV=1	1	1	2	0.514
	SP://Q9NQA5	TRPV5_HUMAN Transient receptor potential cation channel subfamily V member 5 OS=Homo sapiens GN=TRPV5 PE=1 SV=2	1	1	8	0.506
	SP://Q9NPH3	IL1AP_HUMAN Interleukin_1 receptor accessory protein OS=Homo sapiens GN=IL1RAP PE=1 SV=2	1	1	4	0.5
	SP://Q00266	METK1_HUMAN S_adenosylmethionine synthase isoform type_1 OS=Homo sapiens GN=MAT1A PE=1 SV=2	1	2	7	0.496
	SP://P07203	GPX1_HUMAN Glutathione peroxidase 1 OS=Homo sapiens GN=GPX1 PE=1 SV=4	1	1	10	0.49
	SP://Q9NZ08	ERAP1_HUMAN Endoplasmic reticulum aminopeptidase 1 OS=Homo sapiens GN=ERAP1 PE=1 SV=3	1	1	2	0.481
	SP://P27216	ANX13_HUMAN Annexin A13 OS=Homo sapiens GN=ANXA13 PE=1 SV=3	1	1	4	0.478
	SP://P49748	ACADV_HUMAN Very long_chain specific acyl_CoA dehydrogenase_ mitochondrial OS=Homo sapiens GN=ACADVL PE=1 SV=1	1	1	10	0.474
	SP://Q96MG7	MAGG1_HUMAN Melanoma_associated antigen G1 OS=Homo sapiens GN=NDNL2 PE=1 SV=1	1	2	3	0.457
	SP://Q14254	FLOT2_HUMAN Flotillin_2 OS=Homo sapiens GN=FLOT2 PE=1 SV=2	1	1	12	0.452
	SP://Q9Y2J4	AMOL2_HUMAN Angiomotin_like protein 2 OS=Homo sapiens GN=AMOTL2 PE=1 SV=3	1	1	3	0.446
	SP://Q8IZF2	GP116_HUMAN Probable G_protein coupled receptor 116 OS=Homo sapiens GN=GPR116 PE=1 SV=3	1	1	2	0.446
	SP://Q9BZV1	UBXN6_HUMAN UBX domain_containing protein 6 OS=Homo sapiens GN=UBXN6 PE=1 SV=1	1	1	2	0.446
	SP://Q460N3	PAR15_HUMAN Poly [ADP_ribose] polymerase 15 OS=Homo sapiens GN=PARP15 PE=1 SV=1	1	1	3	0.437
	SP://O00159	MYO1C_HUMAN Unconventional myosin_Ic OS=Homo sapiens GN=MYO1C PE=1 SV=4	1	1	5	0.432
	SP://P12277	KCRB_HUMAN Creatine kinase B_type OS=Homo sapiens GN=CKB PE=1 SV=1	1	1	5	0.423
	SP://O14818	PSA7_HUMAN Proteasome subunit alpha type_7 OS=Homo sapiens GN=PSMA7 PE=1 SV=1	1	3	8	0.406
	SP://Q8IVB5	LIX1L_HUMAN LIX1_like protein OS=Homo sapiens GN=LIX1L PE=2 SV=1	1	1	4	0.38
	SP://P31350	RIR2_HUMAN Ribonucleoside_diphosphate reductase subunit M2 OS=Homo sapiens GN=RRM2 PE=1 SV=1	1	1	4	0.371
	SP://Q8NFC6	BD1L1_HUMAN Biorientation of chromosomes in cell division protein 1_like 1 OS=Homo sapiens GN=BOD1L1 PE=1 SV=2	1	1	2	0.371
	SP://P23458	JAK1_HUMAN Tyrosine_protein kinase JAK1 OS=Homo sapiens GN=JAK1 PE=1 SV=2	1	1	4	0.344
	SP://Q99814	EPAS1_HUMAN Endothelial PAS domain_containing protein 1 OS=Homo sapiens GN=EPAS1 PE=1 SV=3	1	2	21	0.325
	SP://Q9Y279	VSIG4_HUMAN V_set and immunoglobulin domain_containing protein 4 OS=Homo sapiens GN=VSIG4 PE=1 SV=1	1	2	2	0.321
	SP://Q9NQX6	ZN331_HUMAN Zinc finger protein 331 OS=Homo sapiens GN=ZNF331 PE=2 SV=1	1	1	2	0.317
	SP://Q8N8S7	ENAH_HUMAN Protein enabled homolog OS=Homo sapiens GN=ENAH PE=1 SV=2	1	1	5	0.295
	SP://Q9ULN7	PNML2_HUMAN PNMA_like protein 2 OS=Homo sapiens GN=PNMAL2 PE=2 SV=2	1	2	2	0.295
	SP://P0C875	U638B_HUMAN UPF0638 protein B OS=Homo sapiens PE=2 SV=1	1	2	2	0.29
	SP://Q14BN4	SLMAP_HUMAN Sarcolemmal membrane_associated protein OS=Homo sapiens GN=SLMAP PE=1 SV=1	1	1	2	0.261
	SP://Q8TBN0	R3GEF_HUMAN Guanine nucleotide exchange factor for Rab_3A OS=Homo sapiens GN=RAB3IL1 PE=1 SV=1	1	2	7	0.26
	SP://Q15031	SYLM_HUMAN Probable leucine__tRNA ligase_ mitochondrial OS=Homo sapiens GN=LARS2 PE=1 SV=2	1	1	4	0.251
	SP://Q9UKT8	FBXW2_HUMAN F_box/WD repeat_containing protein 2 OS=Homo sapiens GN=FBXW2 PE=1 SV=2	1	1	3	0.243
	SP://Q15349	KS6A2_HUMAN Ribosomal protein S6 kinase alpha_2 OS=Homo sapiens GN=RPS6KA2 PE=1 SV=2	1	1	2	0.231
	SP://Q8N239	KLH34_HUMAN Kelch_like protein 34 OS=Homo sapiens GN=KLHL34 PE=2 SV=1	1	1	2	0.227
	SP://P11766	ADHX_HUMAN Alcohol dehydrogenase class_3 OS=Homo sapiens GN=ADH5 PE=1 SV=4	1	1	6	0.215
	SP://Q9Y388	RBMX2_HUMAN RNA_binding motif protein_ X_linked 2 OS=Homo sapiens GN=RBMX2 PE=1 SV=2	1	1	3	0.201
	SP://O15265	ATX7_HUMAN Ataxin_7 OS=Homo sapiens GN=ATXN7 PE=1 SV=1	1	1	3	0.183
	SP://P28072	PSB6_HUMAN Proteasome subunit beta type_6 OS=Homo sapiens GN=PSMB6 PE=1 SV=4	1	1	7	0.18
	SP://Q9H7Z3	CN102_HUMAN UPF0614 protein C14orf102 OS=Homo sapiens GN=C14orf102 PE=1 SV=3	1	1	11	0.173
	SP://P57678	GEMI4_HUMAN Gem_associated protein 4 OS=Homo sapiens GN=GEMIN4 PE=1 SV=2	1	2	17	0.137
	SP://Q2M3G0	ABCB5_HUMAN ATP_binding cassette sub_family B member 5 OS=Homo sapiens GN=ABCB5 PE=1 SV=3	1	2	2	0.131
	SP://Q86Y91	KI18B_HUMAN Kinesin_like protein KIF18B OS=Homo sapiens GN=KIF18B PE=1 SV=3	1	1	2	0.125
	SP://Q14003	KCNC3_HUMAN Potassium voltage_gated channel subfamily C member 3 OS=Homo sapiens GN=KCNC3 PE=1 SV=3	1	3	13	0.101
	SP://P20618	PSB1_HUMAN Proteasome subunit beta type_1 OS=Homo sapiens GN=PSMB1 PE=1 SV=2	1	2	2	0.089
	SP://Q9BYK8	PR285_HUMAN Peroxisomal proliferator_activated receptor A_interacting complex 285 kDa protein OS=Homo sapiens GN=PRIC285 PE=1 SV=6	1	1	3	0.037
	SP://Q86T90	K1328_HUMAN Uncharacterized protein KIAA1328 OS=Homo sapiens GN=KIAA1328 PE=1 SV=2	1	1	2	0.037
